# Supplementary material for: TLE3 loss confers AR inhibitor resistance by facilitating GR-mediated human prostate cancer cell growth
Source: eLife. 2019 Dec 19;8:e47430. doi: 10.7554/eLife.47430 (PMC6968917; doi:10.7554/eLife.47430)
Supplement: Figure 1—source data 1. — Normalized readcounts obtained with massively parallel sequencing are shown for each condition of the CRISPR screen (with three replicates per condition): timepoint 0, untreated and ARN-treated cells. [file elife-47430-fig1-data1.xlsx]

## Sheet: Readcounts CRISPR screen
Figure 1-source data 1: Readcounts CRISPR screen for timepoint 0 (T0), untreated cells (UT) and apalutamide-treated cells (ARN_T2) using 3 replicates for each condition.
Tag	GeneSymbol	type	T0_R1	T0_R2	T0_R3	ARN_T2_R1	ARN_T2_R2	ARN_T2_R3	UT_R1	UT_R2	UT_R3
HGLibA_00001	A1BG	x	163	82	141	26	67	119	104	62	130
HGLibA_00002	A1BG	x	107	38	149	43	31	86	49	156	152
HGLibA_00003	A1BG	x	206	176	319	117	79	15	162	169	369
HGLibA_00004	A1CF	x	33	31	52	210	0	39	62	38	12
HGLibA_00005	A1CF	x	70	53	165	45	3	10	97	122	126
HGLibA_00006	A1CF	x	236	95	194	512	421	72	299	129	234
HGLibA_00007	A2M	x	154	75	83	17	86	7	138	213	135
HGLibA_00008	A2M	x	80	65	144	15	20	30	113	51	101
HGLibA_00009	A2M	x	156	66	184	1170	141	0	273	139	81
HGLibA_00010	A2ML1	x	43	45	61	20	22	73	202	106	32
HGLibA_00011	A2ML1	x	233	165	234	159	43	205	442	186	191
HGLibA_00012	A2ML1	x	103	56	119	63	191	43	138	135	51
HGLibA_00013	A3GALT2	x	68	38	98	10	0	48	83	25	39
HGLibA_00014	A3GALT2	x	120	95	222	96	51	57	273	118	132
HGLibA_00015	A3GALT2	x	6	7	13	0	18	0	39	15	6
HGLibA_00016	A4GALT	x	148	109	268	8	246	93	170	271	104
HGLibA_00017	A4GALT	x	151	112	171	472	346	66	161	170	265
HGLibA_00018	A4GALT	x	167	128	182	1161	150	66	391	179	190
HGLibA_00019	A4GNT	x	129	108	116	35	183	19	126	115	105
HGLibA_00020	A4GNT	x	26	12	36	0	0	23	12	42	7
HGLibA_00021	A4GNT	x	233	134	248	390	35	1190	192	267	236
HGLibA_00022	AAAS	x	107	62	87	59	69	99	150	101	85
HGLibA_00023	AAAS	x	72	10	85	25	0	123	81	46	86
HGLibA_00024	AAAS	x	117	59	77	16	31	44	146	137	161
HGLibA_00025	AACS	x	107	84	98	34	38	70	241	116	240
HGLibA_00026	AACS	x	126	110	224	598	62	0	64	141	98
HGLibA_00027	AACS	x	133	120	246	117	20	2048	355	307	150
HGLibA_00028	AADAC	x	133	52	169	236	22	485	187	176	134
HGLibA_00029	AADAC	x	54	19	48	168	384	0	67	45	75
HGLibA_00030	AADAC	x	63	58	50	42	129	1339	167	165	13
HGLibA_00031	AADACL2	x	68	40	87	5	31	5	143	122	59
HGLibA_00032	AADACL2	x	155	115	316	290	453	273	289	197	207
HGLibA_00033	AADACL2	x	103	81	103	91	130	4806	203	187	76
HGLibA_00034	AADACL3	x	172	104	204	180	24	68	351	349	120
HGLibA_00035	AADACL3	x	128	105	179	125	7	0	126	47	136
HGLibA_00036	AADACL3	x	12	19	62	0	4	28	10	25	107
HGLibA_00037	AADACL4	x	39	58	81	34	8	70	64	94	136
HGLibA_00038	AADACL4	x	30	52	55	0	21	14	67	44	56
HGLibA_00039	AADACL4	x	236	138	240	45	689	102	297	190	341
HGLibA_00040	AADAT	x	187	128	146	58	22	33	190	222	202
HGLibA_00041	AADAT	x	77	55	130	417	93	37	191	98	127
HGLibA_00042	AADAT	x	22	8	7	0	13	0	24	36	53
HGLibA_00043	AAED1	x	31	29	80	14	68	537	91	55	128
HGLibA_00044	AAED1	x	83	133	147	29	80	1027	135	107	205
HGLibA_00045	AAED1	x	15	10	32	15	0	0	29	0	0
HGLibA_00046	AAGAB	x	85	71	162	71	474	7	138	112	42
HGLibA_00047	AAGAB	x	391	226	427	71	68	646	371	237	271
HGLibA_00048	AAGAB	x	158	110	158	97	48	10	86	139	40
HGLibA_00049	AAK1	x	139	79	173	230	653	208	107	450	154
HGLibA_00050	AAK1	x	46	25	71	9	6	6	25	49	5
HGLibA_00051	AAK1	x	159	133	165	527	182	36	221	113	53
HGLibA_00052	AAMDC	x	0	0	20	0	0	0	0	0	10
HGLibA_00053	AAMDC	x	70	53	102	26	659	0	59	30	71
HGLibA_00054	AAMDC	x	87	50	131	0	63	32	81	139	109
HGLibA_00055	AAMP	x	5	1	5	0	0	0	1	0	0
HGLibA_00056	AAMP	x	46	8	41	4	5	0	41	29	5
HGLibA_00057	AAMP	x	226	90	205	80	307	743	203	213	236
HGLibA_00058	AANAT	x	94	53	210	125	8	51	169	121	146
HGLibA_00059	AANAT	x	94	42	137	16	115	17	114	104	57
HGLibA_00060	AANAT	x	20	14	52	24	0	0	64	4	19
HGLibA_00061	AAR2	x	70	61	71	78	29	20	77	186	32
HGLibA_00062	AAR2	x	294	162	250	237	80	44	242	359	255
HGLibA_00063	AAR2	x	0	5	0	0	0	4	19	4	6
HGLibA_00064	AARD	x	50	37	46	393	17	67	117	106	42
HGLibA_00065	AARD	x	67	66	195	48	162	55	151	74	52
HGLibA_00066	AARD	x	133	80	161	15	55	60	224	150	167
HGLibA_00067	AARS	x	100	76	146	19	5	0	96	61	31
HGLibA_00068	AARS	x	48	13	14	0	0	0	5	0	10
HGLibA_00069	AARS	x	291	149	283	367	63	69	407	292	339
HGLibA_00070	AARS2	x	294	136	226	12	19	6	140	46	93
HGLibA_00071	AARS2	x	86	53	69	0	1	24	31	9	4
HGLibA_00072	AARS2	x	138	128	214	65	218	11	280	356	164
HGLibA_00073	AARSD1	x	92	39	117	120	47	0	151	142	289
HGLibA_00074	AARSD1	x	153	120	195	8	48	45	194	143	235
HGLibA_00075	AARSD1	x	258	124	289	53	124	325	231	200	248
HGLibA_00076	AASDH	x	200	165	293	124	12	164	268	269	170
HGLibA_00077	AASDH	x	181	182	311	29	461	48	236	153	135
HGLibA_00078	AASDH	x	67	98	141	54	157	325	106	53	62
HGLibA_00079	AASDHPPT	x	271	216	340	56	51	281	252	370	117
HGLibA_00080	AASDHPPT	x	294	143	450	43	14	72	268	81	217
HGLibA_00081	AASDHPPT	x	169	111	176	40	180	56	229	252	161
HGLibA_00082	AASS	x	50	11	23	8	77	11	52	34	9
HGLibA_00083	AASS	x	68	55	129	1	51	78	132	124	114
HGLibA_00084	AASS	x	46	63	89	7	0	14	62	38	124
HGLibA_00085	AATF	x	53	38	46	11	0	0	34	24	24
HGLibA_00086	AATF	x	104	98	117	290	20	125	138	154	269
HGLibA_00087	AATF	x	76	59	95	0	70	0	90	32	44
HGLibA_00088	AATK	x	35	20	69	16	0	22	0	26	0
HGLibA_00089	AATK	x	44	15	85	14	2	791	21	18	16
HGLibA_00090	AATK	x	218	146	248	14	65	427	183	249	323
HGLibA_00091	ABAT	x	75	63	182	68	437	27	114	164	133
HGLibA_00092	ABAT	x	116	48	75	35	35	0	157	95	31
HGLibA_00093	ABAT	x	179	82	231	111	40	54	245	185	98
HGLibA_00094	ABCA1	x	51	94	101	11	7	26	251	87	161
HGLibA_00095	ABCA1	x	260	146	319	46	41	82	346	213	188
HGLibA_00096	ABCA1	x	60	54	65	13	65	0	41	70	22
HGLibA_00097	ABCA10	x	78	68	192	6	29	0	159	116	141
HGLibA_00098	ABCA10	x	115	77	176	66	68	46	268	95	101
HGLibA_00099	ABCA10	x	86	36	74	79	82	129	115	73	32
HGLibA_00100	ABCA12	x	74	38	58	49	11	6	107	112	139
HGLibA_00101	ABCA12	x	82	49	110	0	276	55	151	78	120
HGLibA_00102	ABCA12	x	49	19	62	99	0	5	44	42	40
HGLibA_00103	ABCA13	x	110	39	74	124	161	85	96	32	85
HGLibA_00104	ABCA13	x	168	88	137	145	110	578	104	230	290
HGLibA_00105	ABCA13	x	90	41	95	40	9	17	54	43	52
HGLibA_00106	ABCA2	x	174	80	159	31	54	13	115	207	155
HGLibA_00107	ABCA2	x	32	38	49	73	78	0	20	17	59
HGLibA_00108	ABCA2	x	7	9	35	0	11	0	0	11	78
HGLibA_00109	ABCA3	x	183	79	211	37	67	8	131	128	111
HGLibA_00110	ABCA3	x	40	25	18	53	31	0	66	12	12
HGLibA_00111	ABCA3	x	101	34	120	0	380	183	122	105	99
HGLibA_00112	ABCA4	x	135	109	112	35	60	19	114	142	189
HGLibA_00113	ABCA4	x	148	134	220	56	1124	3	176	243	123
HGLibA_00114	ABCA4	x	133	130	145	51	10	17	215	144	171
HGLibA_00115	ABCA5	x	157	81	210	35	96	599	346	301	298
HGLibA_00116	ABCA5	x	50	23	50	0	0	0	55	41	21
HGLibA_00117	ABCA5	x	91	51	121	120	0	0	48	77	161
HGLibA_00118	ABCA6	x	95	47	35	201	1	0	130	91	107
HGLibA_00119	ABCA6	x	53	61	94	40	170	136	179	100	141
HGLibA_00120	ABCA6	x	131	71	176	127	18	37	247	159	172
HGLibA_00121	ABCA7	x	23	22	79	241	30	0	20	15	134
HGLibA_00122	ABCA7	x	61	48	67	86	263	71	28	110	98
HGLibA_00123	ABCA7	x	162	105	136	10	78	17	38	159	35
HGLibA_00124	ABCA8	x	187	170	282	81	26	253	427	353	407
HGLibA_00125	ABCA8	x	54	42	92	21	170	7	223	141	75
HGLibA_00126	ABCA8	x	115	38	155	58	69	315	179	232	248
HGLibA_00127	ABCA9	x	196	151	245	113	653	29	196	338	319
HGLibA_00128	ABCA9	x	63	64	76	341	23	0	117	101	104
HGLibA_00129	ABCA9	x	33	0	25	0	0	0	0	61	2
HGLibA_00130	ABCB1	x	25	53	28	1	43	82	112	52	64
HGLibA_00131	ABCB1	x	197	126	218	91	109	110	381	180	195
HGLibA_00132	ABCB1	x	25	16	30	28	8	24	27	38	9
HGLibA_00133	ABCB10	x	125	87	109	45	5	1094	240	237	153
HGLibA_00134	ABCB10	x	243	97	422	68	108	83	116	277	385
HGLibA_00135	ABCB10	x	218	113	202	50	274	15	384	147	101
HGLibA_00136	ABCB11	x	25	37	22	56	39	55	45	31	42
HGLibA_00137	ABCB11	x	19	66	72	18	0	11	93	41	78
HGLibA_00138	ABCB11	x	36	44	34	10	0	7	51	19	24
HGLibA_00139	ABCB4	x	187	122	248	120	274	95	359	167	323
HGLibA_00140	ABCB4	x	113	87	81	8	27	12	89	101	147
HGLibA_00141	ABCB4	x	227	129	260	66	75	35	239	262	153
HGLibA_00142	ABCB5	x	87	43	131	201	8	24	162	108	108
HGLibA_00143	ABCB5	x	66	42	109	190	557	46	143	66	45
HGLibA_00144	ABCB5	x	153	85	179	65	79	166	261	134	187
HGLibA_00145	ABCB6	x	123	98	224	32	23	15	137	178	353
HGLibA_00146	ABCB6	x	111	72	129	26	0	53	103	93	55
HGLibA_00147	ABCB6	x	149	66	111	540	1587	22	229	123	71
HGLibA_00148	ABCB7	x	290	202	329	253	1410	32	132	49	85
HGLibA_00149	ABCB7	x	32	7	24	5	0	0	8	20	38
HGLibA_00150	ABCB7	x	209	78	176	0	56	2488	65	89	157
HGLibA_00151	ABCB8	x	83	35	184	6	10	117	197	147	79
HGLibA_00152	ABCB8	x	293	136	218	756	170	101	183	412	280
HGLibA_00153	ABCB8	x	36	32	92	0	88	19	5	31	53
HGLibA_00154	ABCB9	x	134	74	116	47	14	4	56	55	105
HGLibA_00155	ABCB9	x	193	122	297	488	161	134	359	420	376
HGLibA_00156	ABCB9	x	126	140	181	68	537	26	100	118	48
HGLibA_00157	ABCC1	x	74	28	125	57	200	38	196	156	36
HGLibA_00158	ABCC1	x	112	85	82	92	16	14	340	174	100
HGLibA_00159	ABCC1	x	83	103	129	66	100	13	101	66	86
HGLibA_00160	ABCC10	x	156	115	263	293	46	21	208	148	305
HGLibA_00161	ABCC10	x	54	51	86	29	31	29	31	104	30
HGLibA_00162	ABCC10	x	79	74	178	1014	10	489	112	183	290
HGLibA_00163	ABCC11	x	251	121	186	261	482	286	340	404	172
HGLibA_00164	ABCC11	x	107	108	171	29	797	88	93	82	96
HGLibA_00165	ABCC11	x	141	67	184	1	13	135	138	157	159
HGLibA_00166	ABCC12	x	198	110	156	819	444	32	100	99	124
HGLibA_00167	ABCC12	x	105	42	128	64	225	1023	130	123	153
HGLibA_00168	ABCC12	x	242	131	269	228	188	130	447	325	255
HGLibA_00169	ABCC2	x	15	17	50	28	22	50	260	64	58
HGLibA_00170	ABCC2	x	13	0	9	20	9	6	60	38	7
HGLibA_00171	ABCC2	x	131	63	122	214	273	205	191	101	85
HGLibA_00172	ABCC3	x	22	21	43	110	7	0	57	35	47
HGLibA_00173	ABCC3	x	171	88	94	279	6	8	159	81	69
HGLibA_00174	ABCC3	x	66	54	96	8	6	11	182	116	130
HGLibA_00175	ABCC4	x	102	64	80	112	438	37	196	133	147
HGLibA_00176	ABCC4	x	211	92	230	50	784	285	206	320	247
HGLibA_00177	ABCC4	x	134	129	153	140	113	65	174	196	211
HGLibA_00178	ABCC5	x	41	18	36	15	15	0	25	17	0
HGLibA_00179	ABCC5	x	85	50	82	46	77	72	59	98	75
HGLibA_00180	ABCC5	x	144	92	105	42	5	0	94	83	110
HGLibA_00181	ABCC6	x	227	127	232	12	128	60	90	95	199
HGLibA_00182	ABCC6	x	118	78	170	0	222	15	23	73	34
HGLibA_00183	ABCC6	x	72	88	61	81	12	9	116	51	54
HGLibA_00184	ABCC8	x	31	24	73	40	133	0	19	21	7
HGLibA_00185	ABCC8	x	418	325	551	66	147	458	599	254	329
HGLibA_00186	ABCC8	x	2319	1442	2997	2701	3820	2274	2303	1248	1715
HGLibA_00187	ABCC9	x	142	120	229	117	251	98	203	124	256
HGLibA_00188	ABCC9	x	36	26	51	7	4	0	124	97	60
HGLibA_00189	ABCC9	x	36	27	27	4	15	11	17	24	9
HGLibA_00190	ABCD1	x	88	27	85	6	60	133	7	44	28
HGLibA_00191	ABCD1	x	92	53	148	655	195	54	103	240	127
HGLibA_00192	ABCD1	x	120	91	231	22	29	90	174	249	122
HGLibA_00193	ABCD2	x	77	68	114	122	840	7	96	198	146
HGLibA_00194	ABCD2	x	90	92	128	76	129	45	223	259	120
HGLibA_00195	ABCD2	x	25	36	67	17	0	224	85	36	57
HGLibA_00196	ABCD3	x	189	112	175	406	106	70	404	199	420
HGLibA_00197	ABCD3	x	161	125	182	122	25	57	203	96	103
HGLibA_00198	ABCD3	x	31	19	32	3	4	0	0	30	59
HGLibA_00199	ABCD4	x	150	55	95	105	26	14	114	34	60
HGLibA_00200	ABCD4	x	142	135	197	36	222	48	175	178	166
HGLibA_00201	ABCD4	x	52	56	54	9	66	2673	101	55	153
HGLibA_00202	ABCE1	x	257	88	179	451	107	0	284	288	185
HGLibA_00203	ABCE1	x	175	146	214	98	42	22	270	195	165
HGLibA_00204	ABCE1	x	136	32	88	0	3	52	12	0	15
HGLibA_00205	ABCF1	x	40	22	64	0	6	0	24	35	44
HGLibA_00206	ABCF1	x	93	47	53	0	1	11	0	42	14
HGLibA_00207	ABCF1	x	144	129	277	48	289	77	263	248	193
HGLibA_00208	ABCF2	x	117	59	178	51	35	77	162	35	74
HGLibA_00209	ABCF2	x	67	50	81	185	0	37	109	135	177
HGLibA_00210	ABCF2	x	78	48	226	55	120	41	167	111	49
HGLibA_00211	ABCF3	x	123	96	122	64	15	35	127	37	91
HGLibA_00212	ABCF3	x	182	163	230	93	515	120	157	64	56
HGLibA_00213	ABCF3	x	141	125	312	335	345	67	267	217	260
HGLibA_00214	ABCG1	x	149	74	210	97	538	25	213	108	41
HGLibA_00215	ABCG1	x	124	83	132	51	49	22	107	147	211
HGLibA_00216	ABCG1	x	65	61	140	37	35	33	125	87	100
HGLibA_00217	ABCG2	x	33	26	66	29	73	106	34	28	78
HGLibA_00218	ABCG2	x	104	48	144	14	20	0	123	29	70
HGLibA_00219	ABCG2	x	276	139	330	9	201	90	169	208	341
HGLibA_00220	ABCG4	x	566	256	518	139	374	443	372	342	259
HGLibA_00221	ABCG4	x	189	171	245	41	73	70	181	223	216
HGLibA_00222	ABCG4	x	319	170	218	1257	113	63	348	167	285
HGLibA_00223	ABCG5	x	66	23	93	7	5	9	122	27	48
HGLibA_00224	ABCG5	x	62	30	23	69	88	0	59	99	75
HGLibA_00225	ABCG5	x	188	46	167	27	55	26	157	40	239
HGLibA_00226	ABCG8	n	19	31	66	2	457	10	14	44	70
HGLibA_00227	ABCG8	n	29	21	74	9	160	54	72	27	90
HGLibA_00228	ABCG8	n	75	59	113	69	31	14	170	116	54
HGLibA_00229	ABHD1	x	13	9	6	0	0	0	4	27	12
HGLibA_00230	ABHD1	x	321	139	195	265	88	67	324	274	169
HGLibA_00231	ABHD1	x	50	45	110	193	282	0	97	97	20
HGLibA_00232	ABHD10	x	45	29	89	0	0	30	20	8	88
HGLibA_00233	ABHD10	x	39	25	64	259	68	27	32	40	201
HGLibA_00234	ABHD10	x	155	38	112	61	69	43	196	79	129
HGLibA_00235	ABHD11	x	91	96	77	0	8	22	125	83	42
HGLibA_00236	ABHD11	x	47	69	118	786	46	3	148	170	142
HGLibA_00237	ABHD11	x	58	48	91	4	3	0	12	31	139
HGLibA_00238	ABHD12	x	120	95	202	38	24	39	172	278	130
HGLibA_00239	ABHD12	x	70	69	131	113	308	14	146	92	118
HGLibA_00240	ABHD12	x	158	198	310	1879	148	341	347	439	249
HGLibA_00241	ABHD12B	x	114	106	271	28	68	29	138	118	114
HGLibA_00242	ABHD12B	x	174	117	205	216	50	228	344	199	234
HGLibA_00243	ABHD12B	x	56	39	100	82	33	161	39	96	32
HGLibA_00244	ABHD13	x	83	77	142	139	223	12	128	153	197
HGLibA_00245	ABHD13	x	30	22	47	12	154	13	13	39	9
HGLibA_00246	ABHD13	x	278	148	356	224	918	2914	309	411	357
HGLibA_00247	ABHD14A	x	32	6	23	4	4	0	66	26	18
HGLibA_00248	ABHD14A	x	220	124	199	129	88	249	260	233	188
HGLibA_00249	ABHD14A	x	118	73	141	101	43	23	265	94	163
HGLibA_00250	ABHD14B	x	222	137	345	1300	125	471	180	265	332
HGLibA_00251	ABHD14B	x	192	107	268	24	37	21	140	56	98
HGLibA_00252	ABHD14B	x	82	77	132	80	7	49	233	51	74
HGLibA_00253	ABHD15	x	51	31	54	51	9	19	137	101	92
HGLibA_00254	ABHD15	x	82	58	99	17	159	6	162	266	87
HGLibA_00255	ABHD15	x	66	100	171	319	71	31	68	140	98
HGLibA_00256	ABHD16A	x	8	11	32	9	0	0	6	31	9
HGLibA_00257	ABHD16A	x	108	53	158	26	28	0	26	59	118
HGLibA_00258	ABHD16A	x	110	92	157	85	0	0	90	44	181
HGLibA_00259	ABHD16B	x	112	60	175	72	40	180	262	172	280
HGLibA_00260	ABHD16B	x	368	194	390	274	29	824	365	244	297
HGLibA_00261	ABHD16B	x	202	95	191	61	155	28	121	121	146
HGLibA_00262	ABHD17A	x	15	6	3	46	0	0	1	68	24
HGLibA_00263	ABHD17A	x	25	11	18	0	3	0	52	6	10
HGLibA_00264	ABHD17A	x	129	120	251	17	30	13	131	53	33
HGLibA_00265	ABHD17B	x	64	72	56	2	81	13	89	174	61
HGLibA_00266	ABHD17B	x	44	38	55	44	0	10	54	4	53
HGLibA_00267	ABHD17B	x	125	59	115	446	81	81	227	120	145
HGLibA_00268	ABHD17C	x	47	24	55	4	14	0	47	104	17
HGLibA_00269	ABHD17C	x	188	92	253	1765	60	56	343	157	211
HGLibA_00270	ABHD17C	x	104	45	86	9	16	70	91	51	63
HGLibA_00271	ABHD2	x	68	51	88	3	53	15	46	139	119
HGLibA_00272	ABHD2	x	247	218	417	543	153	286	441	249	380
HGLibA_00273	ABHD2	x	130	53	132	133	253	55	178	113	79
HGLibA_00274	ABHD3	x	140	40	118	24	31	117	108	135	145
HGLibA_00275	ABHD3	x	290	145	195	82	277	593	278	201	98
HGLibA_00276	ABHD3	x	140	54	113	61	19	21	82	58	28
HGLibA_00277	ABHD4	x	136	99	120	554	20	16	323	205	154
HGLibA_00278	ABHD4	x	73	30	83	0	49	25	110	109	80
HGLibA_00279	ABHD4	x	120	132	219	12	11	125	255	209	98
HGLibA_00280	ABHD5	x	152	82	127	27	41	14	54	88	131
HGLibA_00281	ABHD5	x	157	122	200	107	80	803	220	381	268
HGLibA_00282	ABHD5	x	122	65	219	284	6	13	169	207	200
HGLibA_00283	ABHD6	x	345	246	580	400	490	286	458	246	303
HGLibA_00284	ABHD6	x	61	39	47	0	39	0	103	60	15
HGLibA_00285	ABHD6	x	69	47	107	44	10	52	206	144	200
HGLibA_00286	ABHD8	x	410	189	384	89	272	757	448	584	275
HGLibA_00287	ABHD8	x	77	65	100	7	41	13	63	65	80
HGLibA_00288	ABHD8	x	73	76	59	0	293	0	20	56	5
HGLibA_00289	ABI1	x	64	64	175	42	21	0	40	106	8
HGLibA_00290	ABI1	x	202	79	183	125	8	47	76	90	79
HGLibA_00291	ABI1	x	181	112	183	55	551	127	318	221	190
HGLibA_00292	ABI2	x	90	44	147	21	26	9	250	45	300
HGLibA_00293	ABI2	x	118	88	211	33	58	149	155	132	156
HGLibA_00294	ABI2	x	278	148	262	87	20	389	169	286	447
HGLibA_00295	ABI3	x	20	15	61	13	6	14	48	62	27
HGLibA_00296	ABI3	x	169	89	131	14	34	78	250	245	295
HGLibA_00297	ABI3	x	232	139	242	176	111	187	316	224	221
HGLibA_00298	ABI3BP	x	95	80	139	111	28	217	185	163	136
HGLibA_00299	ABI3BP	x	17	26	80	0	7	0	89	140	5
HGLibA_00300	ABI3BP	x	174	126	235	27	825	751	187	104	214
HGLibA_00301	ABL1	x	169	105	193	118	53	194	314	180	322
HGLibA_00302	ABL1	x	246	140	387	83	628	384	278	150	296
HGLibA_00303	ABL1	x	103	46	119	9	5	47	106	39	16
HGLibA_00304	ABL2	x	216	188	249	352	359	271	661	327	237
HGLibA_00305	ABL2	x	80	37	104	52	47	45	124	72	49
HGLibA_00306	ABL2	x	500	356	700	269	606	93	530	300	533
HGLibA_00307	ABLIM1	x	60	24	78	7	0	0	14	4	91
HGLibA_00308	ABLIM1	x	104	66	159	79	76	5	182	236	176
HGLibA_00309	ABLIM1	x	322	218	412	467	63	693	323	358	369
HGLibA_00310	ABLIM2	x	128	101	214	203	78	72	152	292	177
HGLibA_00311	ABLIM2	x	84	18	61	0	6	0	19	13	9
HGLibA_00312	ABLIM2	x	68	100	83	9	124	1	113	92	43
HGLibA_00313	ABLIM3	x	59	72	149	28	0	308	25	124	124
HGLibA_00314	ABLIM3	x	55	32	126	0	8	42	20	22	38
HGLibA_00315	ABLIM3	x	195	154	312	339	146	431	230	239	342
HGLibA_00316	ABO	x	124	54	63	4	1	16	127	180	98
HGLibA_00317	ABO	x	36	45	113	44	0	8	67	61	24
HGLibA_00318	ABO	x	148	115	116	45	407	70	110	153	119
HGLibA_00322	ABR	x	70	40	24	0	0	0	62	44	17
HGLibA_00323	ABR	x	58	72	100	52	76	35	135	106	89
HGLibA_00324	ABR	x	73	44	112	5	30	0	93	10	14
HGLibA_00325	ABRA	x	74	48	115	184	253	94	25	126	37
HGLibA_00326	ABRA	x	145	56	147	1141	161	453	267	237	104
HGLibA_00327	ABRA	x	309	232	448	182	239	1433	659	398	327
HGLibA_00328	ABRACL	x	9	14	53	16	5	5	19	64	44
HGLibA_00329	ABRACL	x	100	83	53	840	9	16	16	84	115
HGLibA_00330	ABRACL	x	45	17	54	51	43	12	79	79	25
HGLibA_00331	ABT1	x	144	185	386	45	31	59	194	157	199
HGLibA_00332	ABT1	x	112	32	100	10	0	6	16	8	24
HGLibA_00333	ABT1	x	153	69	125	253	70	48	225	147	198
HGLibA_00334	ABTB1	x	61	37	79	30	80	0	39	55	30
HGLibA_00335	ABTB1	x	140	65	145	25	32	4274	36	162	86
HGLibA_00336	ABTB1	x	147	145	308	183	271	27	212	306	133
HGLibA_00337	ABTB2	x	243	128	179	59	421	318	299	161	209
HGLibA_00338	ABTB2	x	206	134	250	661	13	483	303	162	426
HGLibA_00339	ABTB2	x	106	51	114	20	0	58	156	145	103
HGLibA_00340	ACAA1	x	160	53	134	12	15	42	46	39	53
HGLibA_00341	ACAA1	x	90	57	88	111	13	17	158	90	54
HGLibA_00342	ACAA1	x	45	45	65	16	8	6	13	33	9
HGLibA_00343	ACAA2	x	21	23	81	27	29	0	38	106	46
HGLibA_00344	ACAA2	x	141	58	171	99	20	244	248	136	123
HGLibA_00345	ACAA2	x	82	105	98	77	1	750	126	139	110
HGLibA_00346	ACACA	x	224	113	272	170	44	32	389	345	195
HGLibA_00347	ACACA	x	165	75	114	160	184	46	58	165	76
HGLibA_00348	ACACA	x	0	44	34	17	0	10	110	20	14
HGLibA_00349	ACACB	x	101	94	177	115	54	26	187	111	105
HGLibA_00350	ACACB	x	68	33	64	121	13	330	155	40	6
HGLibA_00351	ACACB	x	270	200	214	105	1	103	388	372	185
HGLibA_00352	ACAD10	x	155	61	150	47	6	44	242	193	192
HGLibA_00353	ACAD10	x	82	43	99	5	10	86	108	49	62
HGLibA_00354	ACAD10	x	45	51	92	147	16	30	49	118	76
HGLibA_00355	ACAD11	x	132	116	147	160	141	9	117	149	161
HGLibA_00356	ACAD11	x	55	47	95	25	26	41	19	191	67
HGLibA_00357	ACAD11	x	188	126	193	851	109	47	91	313	87
HGLibA_00358	ACAD8	x	43	42	117	7	94	10	43	139	48
HGLibA_00359	ACAD8	x	99	45	95	31	71	73	35	66	11
HGLibA_00360	ACAD8	x	31	34	97	14	4	184	62	66	41
HGLibA_00361	ACAD9	x	305	173	338	270	291	213	328	427	336
HGLibA_00362	ACAD9	x	139	114	194	15	56	57	242	97	213
HGLibA_00363	ACAD9	x	94	25	61	554	54	96	122	79	68
HGLibA_00364	ACADL	x	142	89	185	54	17	208	235	193	60
HGLibA_00365	ACADL	x	66	43	126	6	0	199	123	33	139
HGLibA_00366	ACADL	x	88	42	64	21	0	0	48	52	19
HGLibA_00367	ACADM	x	59	76	70	36	0	0	147	89	20
HGLibA_00368	ACADM	x	12	26	34	0	0	14	1	36	24
HGLibA_00369	ACADM	x	109	74	173	38	92	43	131	139	90
HGLibA_00370	ACADS	x	157	79	191	121	18	759	208	253	239
HGLibA_00371	ACADS	x	235	98	132	21	20	34	127	64	134
HGLibA_00372	ACADS	x	327	207	245	32	822	54	373	239	260
HGLibA_00373	ACADSB	x	215	182	321	135	1818	136	509	245	378
HGLibA_00374	ACADSB	x	60	41	47	9	115	0	92	96	85
HGLibA_00375	ACADSB	x	57	35	89	46	4	0	108	36	58
HGLibA_00376	ACADVL	x	36	19	31	0	0	6	11	6	0
HGLibA_00377	ACADVL	x	38	13	63	0	5	49	11	100	93
HGLibA_00378	ACADVL	x	103	30	71	12	7	0	57	48	26
HGLibA_00379	ACAN	x	116	111	139	124	77	775	122	255	152
HGLibA_00380	ACAN	x	86	71	207	235	30	29	338	139	128
HGLibA_00381	ACAN	x	135	93	99	95	22	12	198	178	79
HGLibA_00382	ACAP1	x	283	149	408	286	235	228	536	343	253
HGLibA_00383	ACAP1	x	152	53	150	35	12	0	174	152	31
HGLibA_00384	ACAP1	x	68	30	133	51	27	12	52	26	61
HGLibA_00385	ACAP2	x	251	183	430	2520	62	43	581	585	362
HGLibA_00386	ACAP2	x	12	21	38	0	212	0	22	10	16
HGLibA_00387	ACAP2	x	251	189	344	285	469	108	328	227	246
HGLibA_00388	ACAP3	x	39	52	77	0	0	8	10	72	32
HGLibA_00389	ACAP3	x	300	149	383	93	23	740	230	110	159
HGLibA_00390	ACAP3	x	137	73	139	0	19	35	7	49	33
HGLibA_00391	ACAT1	x	207	97	259	109	40	327	293	209	202
HGLibA_00392	ACAT1	x	109	156	248	1935	118	239	136	110	200
HGLibA_00393	ACAT1	x	105	111	154	2230	124	141	303	119	159
HGLibA_00394	ACAT2	x	81	69	186	106	22	13	135	101	57
HGLibA_00395	ACAT2	x	118	126	162	58	25	40	155	25	82
HGLibA_00396	ACAT2	x	199	138	380	1064	332	518	487	325	396
HGLibA_00397	ACBD3	x	71	62	95	9	35	26	277	158	113
HGLibA_00398	ACBD3	x	143	41	142	54	30	0	31	48	150
HGLibA_00399	ACBD3	x	65	48	81	64	39	27	180	51	57
HGLibA_00400	ACBD4	x	160	52	142	17	10	42	159	96	154
HGLibA_00401	ACBD4	x	30	47	71	76	7	0	33	66	20
HGLibA_00402	ACBD4	x	56	44	104	0	14	7	39	66	157
HGLibA_00403	ACBD5	x	151	116	134	31	95	75	248	160	158
HGLibA_00404	ACBD5	x	334	128	317	233	43	70	453	315	199
HGLibA_00405	ACBD5	x	155	66	233	21	87	29	123	195	77
HGLibA_00406	ACBD6	x	80	29	60	0	22	0	0	64	53
HGLibA_00407	ACBD6	x	62	7	38	0	0	40	36	18	22
HGLibA_00408	ACBD6	x	4	16	31	6	12	0	5	10	3
HGLibA_00409	ACBD7	x	171	94	248	240	589	275	265	233	264
HGLibA_00410	ACBD7	x	288	90	332	642	127	5556	558	298	358
HGLibA_00411	ACBD7	x	71	28	62	44	352	0	45	73	33
HGLibA_00412	ACCS	x	76	26	17	679	13	20	128	55	9
HGLibA_00413	ACCS	x	144	145	210	145	101	98	151	211	157
HGLibA_00414	ACCS	x	111	130	210	46	8	34	138	163	319
HGLibA_00415	ACCSL	x	86	61	110	12	32	46	61	100	133
HGLibA_00416	ACCSL	x	76	55	58	114	32	341	138	54	90
HGLibA_00417	ACCSL	x	1	5	9	96	0	0	0	11	0
HGLibA_00418	ACD	x	121	32	86	250	1079	539	56	110	9
HGLibA_00419	ACD	x	144	83	136	29	32	45	172	100	114
HGLibA_00420	ACD	x	75	47	50	24	7	35	100	58	145
HGLibA_00421	ACE	x	110	72	116	24	67	161	46	53	128
HGLibA_00422	ACE	x	141	64	95	102	5	32	144	55	220
HGLibA_00423	ACE	x	113	72	97	9	11	0	53	111	27
HGLibA_00424	ACE2	x	97	34	81	10	13	33	49	63	45
HGLibA_00425	ACE2	x	270	154	353	42	199	32	218	178	183
HGLibA_00426	ACE2	x	167	208	404	105	128	184	336	390	487
HGLibA_00427	ACER1	x	222	129	260	152	183	155	630	247	489
HGLibA_00428	ACER1	x	80	59	108	92	5	43	134	105	186
HGLibA_00429	ACER1	x	66	139	252	1019	43	134	224	152	355
HGLibA_00430	ACER2	x	72	30	130	0	1105	234	103	104	105
HGLibA_00431	ACER2	x	6	19	18	18	46	15	24	3	3
HGLibA_00432	ACER2	x	134	79	94	25	56	17	56	153	124
HGLibA_00433	ACER3	x	126	80	218	67	364	546	156	198	154
HGLibA_00434	ACER3	x	107	113	249	46	20	30	316	94	175
HGLibA_00435	ACER3	x	79	48	101	404	0	25	90	69	89
HGLibA_00436	ACHE	x	128	101	167	62	146	508	216	329	208
HGLibA_00437	ACHE	x	191	80	143	24	255	13	110	66	54
HGLibA_00438	ACHE	x	149	78	135	143	107	79	101	116	221
HGLibA_00439	ACIN1	x	134	118	180	109	205	66	189	172	383
HGLibA_00440	ACIN1	x	93	27	132	160	1959	46	110	87	50
HGLibA_00441	ACIN1	x	121	72	122	102	600	23	201	98	61
HGLibA_00444	ACKR2	x	287	220	435	93	352	121	404	255	427
HGLibA_00446	ACKR3	x	51	46	101	3	45	32	54	34	99
HGLibA_00447	ACKR3	x	173	116	237	73	257	198	199	140	323
HGLibA_00448	ACKR4	x	109	47	194	11	36	187	124	186	125
HGLibA_00449	ACKR4	x	126	88	172	40	7	16	173	127	177
HGLibA_00450	ACKR4	x	166	88	211	48	68	366	171	83	130
HGLibA_00451	ACLY	x	129	53	164	11	16	32	97	114	104
HGLibA_00452	ACLY	x	86	54	110	23	30	0	111	84	262
HGLibA_00453	ACLY	x	234	174	274	157	105	50	361	351	385
HGLibA_00454	ACMSD	x	196	107	296	42	102	625	224	429	181
HGLibA_00455	ACMSD	x	87	70	146	169	16	39	387	99	98
HGLibA_00456	ACMSD	x	206	70	140	211	68	110	332	126	383
HGLibA_00457	ACN9	x	184	104	166	54	145	57	209	133	132
HGLibA_00458	ACN9	x	206	95	153	168	8	32	375	102	247
HGLibA_00459	ACN9	x	33	17	88	20	9	0	84	41	157
HGLibA_00460	ACO1	x	88	93	126	41	19	64	106	159	238
HGLibA_00461	ACO1	x	17	36	64	0	148	0	39	61	44
HGLibA_00462	ACO1	x	218	138	321	414	603	761	390	422	348
HGLibA_00463	ACO2	x	60	48	75	0	81	76	104	101	67
HGLibA_00464	ACO2	x	174	76	172	59	43	1194	187	88	195
HGLibA_00465	ACO2	x	43	105	84	809	130	41	154	110	178
HGLibA_00466	ACOT1	x	209	191	324	47	160	262	510	261	388
HGLibA_00467	ACOT1	x	285	187	343	93	309	84	323	302	211
HGLibA_00468	ACOT1	x	153	81	140	99	105	9	475	155	149
HGLibA_00469	ACOT11	x	364	159	298	539	42	41	389	185	107
HGLibA_00470	ACOT11	x	181	90	188	215	99	53	112	87	206
HGLibA_00471	ACOT11	x	106	77	166	374	243	0	471	184	124
HGLibA_00472	ACOT12	x	37	51	95	5	9	9	46	195	33
HGLibA_00473	ACOT12	x	47	13	42	0	0	0	76	16	98
HGLibA_00474	ACOT12	x	39	36	52	0	0	0	29	168	0
HGLibA_00475	ACOT13	x	28	14	0	0	0	0	2	11	37
HGLibA_00476	ACOT13	x	170	58	117	226	35	27	168	201	58
HGLibA_00477	ACOT13	x	73	140	159	1654	25	169	94	168	131
HGLibA_00478	ACOT2	x	19	42	25	11	14	10	60	11	67
HGLibA_00479	ACOT2	x	35	40	91	24	87	2986	71	75	73
HGLibA_00480	ACOT2	x	105	85	236	370	35	199	76	212	154
HGLibA_00481	ACOT4	x	34	36	71	98	225	81	46	72	82
HGLibA_00482	ACOT4	x	1	23	71	8	33	0	21	0	55
HGLibA_00483	ACOT4	x	37	5	40	10	0	0	49	30	77
HGLibA_00484	ACOT6	x	141	107	254	32	75	18	234	506	211
HGLibA_00485	ACOT6	x	98	30	106	3	0	2	158	71	117
HGLibA_00486	ACOT6	x	84	36	97	93	7	21	93	37	117
HGLibA_00487	ACOT7	x	101	83	111	9	121	12	140	173	339
HGLibA_00488	ACOT7	x	75	85	68	86	44	0	220	47	57
HGLibA_00489	ACOT7	x	207	180	281	69	86	97	180	307	205
HGLibA_00490	ACOT8	x	67	27	77	13	125	58	80	44	65
HGLibA_00491	ACOT8	x	33	21	69	486	11	165	75	53	113
HGLibA_00492	ACOT8	x	299	201	456	300	191	246	275	413	362
HGLibA_00493	ACOT9	x	112	92	121	45	29	1500	151	207	195
HGLibA_00494	ACOT9	x	36	9	29	27	10	305	32	10	157
HGLibA_00495	ACOT9	x	197	141	263	156	453	169	305	215	274
HGLibA_00496	ACOX1	x	60	62	108	61	87	22	77	120	42
HGLibA_00497	ACOX1	x	61	86	173	75	16	190	231	65	78
HGLibA_00498	ACOX1	x	95	77	147	20	47	23	26	169	50
HGLibA_00499	ACOX2	x	122	74	79	0	12	7	25	62	63
HGLibA_00500	ACOX2	x	153	72	215	5	10	7	63	72	152
HGLibA_00501	ACOX2	x	113	46	126	47	182	28	284	154	67
HGLibA_00502	ACOX3	x	174	91	269	33	353	245	164	212	213
HGLibA_00503	ACOX3	x	80	67	105	59	28	0	57	129	47
HGLibA_00504	ACOX3	x	14	5	56	0	0	0	10	1	88
HGLibA_00505	ACOXL	x	42	37	71	16	0	5	37	39	91
HGLibA_00506	ACOXL	x	177	115	110	63	116	897	208	258	188
HGLibA_00507	ACOXL	x	103	80	223	262	0	2502	185	154	108
HGLibA_00508	ACP1	x	108	47	137	334	68	169	151	120	110
HGLibA_00509	ACP1	x	138	104	170	340	73	56	226	138	94
HGLibA_00510	ACP1	x	97	66	154	2530	39	26	149	223	117
HGLibA_00511	ACP2	x	296	129	218	63	86	526	203	93	222
HGLibA_00512	ACP2	x	94	89	161	364	197	75	137	141	103
HGLibA_00513	ACP2	x	12	44	24	7	3	0	139	72	33
HGLibA_00514	ACP5	x	124	41	96	107	95	0	99	149	129
HGLibA_00515	ACP5	x	49	22	102	17	95	23	38	174	105
HGLibA_00516	ACP5	x	92	57	64	25	198	29	63	57	114
HGLibA_00517	ACP6	x	84	74	101	203	130	94	150	298	57
HGLibA_00518	ACP6	x	79	90	171	200	21	128	162	279	91
HGLibA_00519	ACP6	x	266	124	275	273	64	103	185	308	402
HGLibA_00520	ACPL2	x	31	35	22	11	0	55	79	14	123
HGLibA_00521	ACPL2	x	125	109	175	24	115	37	208	171	83
HGLibA_00522	ACPL2	x	93	69	113	70	3	203	270	91	55
HGLibA_00523	ACPP	x	143	85	259	31	6	163	76	119	126
HGLibA_00524	ACPP	x	23	15	24	0	21	10	24	35	114
HGLibA_00525	ACPP	x	199	102	299	205	221	19	281	238	163
HGLibA_00526	ACPT	x	144	61	140	62	142	15	160	188	82
HGLibA_00527	ACPT	x	67	67	148	105	77	299	139	132	60
HGLibA_00528	ACPT	x	89	93	143	150	370	921	271	145	199
HGLibA_00529	ACR	x	34	13	72	12	19	118	62	40	89
HGLibA_00530	ACR	x	186	76	243	28	394	2985	206	139	137
HGLibA_00531	ACR	x	21	30	129	2	78	13	81	57	65
HGLibA_00532	ACRBP	x	95	95	143	81	49	32	104	105	156
HGLibA_00533	ACRBP	x	169	116	155	14	344	349	168	154	114
HGLibA_00534	ACRBP	x	8	19	37	49	59	0	38	125	41
HGLibA_00535	ACRC	x	147	55	105	323	43	15	109	58	159
HGLibA_00536	ACRC	x	38	20	56	42	93	0	30	19	0
HGLibA_00537	ACRC	x	176	130	235	173	71	1729	301	168	407
HGLibA_00538	ACRV1	x	126	120	207	172	637	91	127	187	237
HGLibA_00539	ACRV1	x	112	86	105	85	13	192	115	34	122
HGLibA_00540	ACRV1	x	126	125	162	85	213	142	304	159	266
HGLibA_00541	ACSBG1	x	73	90	166	263	11	392	111	93	131
HGLibA_00542	ACSBG1	x	191	119	222	126	39	33	102	133	118
HGLibA_00543	ACSBG1	x	474	331	604	177	337	245	566	517	368
HGLibA_00544	ACSBG2	x	196	148	172	61	370	55	228	234	291
HGLibA_00545	ACSBG2	x	150	80	190	140	464	40	255	269	105
HGLibA_00546	ACSBG2	x	69	70	97	30	0	16	74	29	36
HGLibA_00547	ACSF2	x	172	90	180	35	39	118	168	84	66
HGLibA_00548	ACSF2	x	225	123	204	31	16	0	56	100	128
HGLibA_00549	ACSF2	x	23	51	44	150	0	12	58	19	34
HGLibA_00550	ACSF3	x	106	50	94	63	24	31	94	62	74
HGLibA_00551	ACSF3	x	112	76	214	27	309	149	158	83	231
HGLibA_00552	ACSF3	x	21	21	18	6	35	16	18	26	10
HGLibA_00553	ACSL1	x	211	145	307	61	204	247	166	238	282
HGLibA_00554	ACSL1	x	228	202	245	78	900	19	199	484	164
HGLibA_00555	ACSL1	x	168	62	198	209	15	59	381	289	138
HGLibA_00556	ACSL3	x	138	117	185	105	102	43	82	35	245
HGLibA_00557	ACSL3	x	89	79	142	29	15	175	32	62	67
HGLibA_00558	ACSL3	x	116	68	253	426	17	29	135	185	227
HGLibA_00559	ACSL4	x	102	70	109	23	31	9	131	128	57
HGLibA_00560	ACSL4	x	86	146	276	143	66	97	133	102	124
HGLibA_00561	ACSL4	x	219	112	276	82	187	122	206	109	290
HGLibA_00562	ACSL5	x	218	163	130	1058	111	49	321	395	210
HGLibA_00563	ACSL5	x	18	8	0	0	0	7	15	6	0
HGLibA_00564	ACSL5	x	127	123	139	74	145	85	311	237	214
HGLibA_00565	ACSL6	x	139	90	178	121	328	29	73	209	127
HGLibA_00566	ACSL6	x	103	61	138	35	261	43	60	156	63
HGLibA_00567	ACSL6	x	13	67	96	58	85	6	62	86	107
HGLibA_00568	ACSM1	x	118	84	97	43	31	43	213	90	164
HGLibA_00569	ACSM1	x	125	141	260	21	1343	501	70	177	195
HGLibA_00570	ACSM1	x	94	19	71	0	0	10	14	48	46
HGLibA_00571	ACSM2A	x	325	166	271	6	18	297	279	303	206
HGLibA_00572	ACSM2A	x	99	98	161	9	210	0	67	89	127
HGLibA_00573	ACSM2A	x	134	87	172	350	344	73	303	157	214
HGLibA_00574	ACSM2B	x	158	91	158	124	158	89	528	187	244
HGLibA_00575	ACSM2B	x	116	73	140	18	34	14	176	111	71
HGLibA_00576	ACSM2B	x	64	50	191	309	8	42	198	113	253
HGLibA_00577	ACSM3	x	136	99	136	255	0	99	149	83	100
HGLibA_00578	ACSM3	x	195	141	354	290	166	245	187	303	405
HGLibA_00579	ACSM3	x	83	58	79	25	159	11	155	215	224
HGLibA_00580	ACSM4	x	15	8	19	3	1	5	29	39	2
HGLibA_00581	ACSM4	x	188	134	193	32	40	57	336	252	88
HGLibA_00582	ACSM4	x	182	153	230	130	70	63	351	295	187
HGLibA_00583	ACSM5	x	46	11	63	31	0	26	65	29	36
HGLibA_00584	ACSM5	x	84	43	96	37	50	50	135	168	92
HGLibA_00585	ACSM5	x	39	37	78	37	0	7	91	120	165
HGLibA_00586	ACSS1	x	86	74	76	15	27	27	149	62	70
HGLibA_00587	ACSS1	x	76	72	85	46	79	17	179	114	58
HGLibA_00588	ACSS1	x	55	46	102	7	39	10	60	4	54
HGLibA_00589	ACSS2	x	170	115	109	134	145	251	175	77	139
HGLibA_00590	ACSS2	x	220	160	246	99	31	71	175	231	172
HGLibA_00591	ACSS2	x	102	84	59	59	364	112	106	200	91
HGLibA_00592	ACSS3	x	197	100	268	20	46	0	253	223	211
HGLibA_00593	ACSS3	x	41	14	42	57	32	832	41	77	14
HGLibA_00594	ACSS3	x	15	4	24	13	9	0	7	95	36
HGLibA_00595	ACTA1	x	229	178	224	245	626	195	317	710	324
HGLibA_00596	ACTA1	x	235	115	384	147	98	115	546	251	164
HGLibA_00597	ACTA1	x	96	85	156	94	252	6491	204	256	195
HGLibA_00598	ACTA2	x	125	88	149	47	32	1206	155	119	132
HGLibA_00599	ACTA2	x	104	72	63	0	58	2	61	26	79
HGLibA_00600	ACTA2	x	15	17	31	98	11	0	62	15	0
HGLibA_00601	ACTB	x	29	44	86	0	8	0	13	34	46
HGLibA_00602	ACTB	x	40	23	32	18	4	16	69	56	45
HGLibA_00603	ACTB	x	516	324	644	472	349	988	828	369	704
HGLibA_00604	ACTBL2	x	119	75	255	111	45	1080	227	277	367
HGLibA_00605	ACTBL2	x	173	70	181	32	44	364	159	163	291
HGLibA_00606	ACTBL2	x	219	185	275	182	1051	146	246	383	262
HGLibA_00607	ACTC1	x	104	58	182	75	34	35	232	184	78
HGLibA_00608	ACTC1	x	11	9	13	0	1	3	14	4	6
HGLibA_00609	ACTC1	x	32	28	77	195	5	0	56	79	76
HGLibA_00610	ACTG1	x	297	105	183	110	37	139	256	249	133
HGLibA_00611	ACTG1	x	154	57	153	47	92	42	279	193	120
HGLibA_00612	ACTG1	x	14	4	11	0	0	0	17	1	4
HGLibA_00613	ACTG2	x	258	180	379	83	59	169	266	404	192
HGLibA_00614	ACTG2	x	96	52	99	150	0	0	141	41	42
HGLibA_00615	ACTG2	x	239	104	210	133	78	96	367	118	340
HGLibA_00616	ACTL10	x	153	56	121	0	23	56	42	65	83
HGLibA_00617	ACTL10	x	18	17	54	11	7	0	57	4	0
HGLibA_00618	ACTL10	x	293	210	352	97	64	113	483	377	530
HGLibA_00619	ACTL6A	x	198	152	222	14	0	76	99	59	173
HGLibA_00620	ACTL6A	x	191	159	187	3	49	0	77	86	135
HGLibA_00621	ACTL6A	x	250	136	330	42	232	911	765	305	310
HGLibA_00622	ACTL6B	x	69	39	54	404	0	11	145	37	63
HGLibA_00623	ACTL6B	x	286	239	331	78	591	47	96	203	314
HGLibA_00624	ACTL6B	x	108	103	89	42	5	58	78	161	93
HGLibA_00625	ACTL7A	x	359	181	356	128	175	65	431	186	290
HGLibA_00626	ACTL7A	x	293	191	346	4881	95	727	369	262	344
HGLibA_00627	ACTL7A	x	157	84	235	78	37	518	208	120	140
HGLibA_00628	ACTL7B	x	66	36	103	353	42	30	131	99	168
HGLibA_00629	ACTL7B	x	145	62	153	14	15	12	170	58	42
HGLibA_00630	ACTL7B	x	116	98	203	269	94	0	129	230	239
HGLibA_00631	ACTL8	x	40	56	79	18	223	112	28	75	128
HGLibA_00632	ACTL8	x	164	131	210	229	60	77	340	377	176
HGLibA_00633	ACTL8	x	65	13	69	0	0	59	70	91	56
HGLibA_00634	ACTL9	x	234	154	217	181	250	645	211	190	90
HGLibA_00635	ACTL9	x	71	26	51	6	0	20	18	99	88
HGLibA_00636	ACTL9	x	30	25	52	173	27	158	78	30	29
HGLibA_00637	ACTN1	x	108	118	167	8	252	38	213	79	130
HGLibA_00638	ACTN1	x	328	199	341	113	279	138	147	298	111
HGLibA_00639	ACTN1	x	50	40	109	17	8	37	146	130	22
HGLibA_00640	ACTN2	x	49	83	125	48	379	433	153	122	118
HGLibA_00641	ACTN2	x	70	58	65	39	47	54	141	14	75
HGLibA_00642	ACTN2	x	282	183	281	371	44	121	341	323	266
HGLibA_00643	ACTN4	x	296	135	195	32	307	32	211	314	74
HGLibA_00644	ACTN4	x	67	67	35	19	0	0	63	31	126
HGLibA_00645	ACTN4	x	13	34	13	0	0	0	12	119	68
HGLibA_00646	ACTR10	x	9	18	2	0	4	12	6	14	23
HGLibA_00647	ACTR10	x	244	114	267	139	84	253	187	267	348
HGLibA_00648	ACTR10	x	5	27	60	0	7	0	29	28	3
HGLibA_00649	ACTR1A	x	328	270	444	135	145	691	470	275	474
HGLibA_00650	ACTR1A	x	141	106	54	53	72	185	89	107	44
HGLibA_00651	ACTR1A	x	228	150	247	890	222	0	413	253	81
HGLibA_00652	ACTR1B	x	22	27	74	22	18	7	36	75	85
HGLibA_00653	ACTR1B	x	23	48	18	216	17	41	41	9	30
HGLibA_00654	ACTR1B	x	54	4	62	7	0	6	37	20	10
HGLibA_00655	ACTR2	x	9	30	66	0	6	16	14	24	20
HGLibA_00656	ACTR2	x	263	172	269	44	61	57	205	215	151
HGLibA_00657	ACTR2	x	33	17	40	16	0	0	3	43	22
HGLibA_00658	ACTR3	x	84	32	88	8	84	11	134	85	106
HGLibA_00659	ACTR3	x	211	128	216	18	63	0	186	422	106
HGLibA_00660	ACTR3	x	71	51	80	11	5	156	194	104	135
HGLibA_00661	ACTR3B	x	209	131	288	57	32	192	135	113	141
HGLibA_00662	ACTR3B	x	221	116	227	146	35	20	363	204	289
HGLibA_00663	ACTR3B	x	346	273	259	317	107	97	352	504	476
HGLibA_00664	ACTR3C	x	221	127	297	85	66	92	242	276	239
HGLibA_00665	ACTR3C	x	228	135	328	293	185	17	337	138	106
HGLibA_00666	ACTR3C	x	86	66	121	8	216	89	191	145	63
HGLibA_00667	ACTR5	x	202	182	322	51	24	115	117	97	73
HGLibA_00668	ACTR5	x	85	79	123	37	40	18	129	44	91
HGLibA_00669	ACTR5	x	74	27	91	241	16	11	56	25	18
HGLibA_00670	ACTR6	x	19	21	7	25	12	8	60	45	56
HGLibA_00671	ACTR6	x	212	170	311	20	0	11	65	103	57
HGLibA_00672	ACTR6	x	47	44	95	21	41	0	151	35	56
HGLibA_00673	ACTR8	x	72	57	129	16	26	86	115	140	79
HGLibA_00674	ACTR8	x	182	129	229	128	43	7	187	87	197
HGLibA_00675	ACTR8	x	188	93	127	88	34	54	300	108	104
HGLibA_00676	ACTRT1	x	91	87	143	18	7	395	79	68	50
HGLibA_00677	ACTRT1	x	22	36	49	14	22	34	65	106	79
HGLibA_00678	ACTRT1	x	132	86	166	70	24	29	310	87	91
HGLibA_00679	ACTRT2	x	4	9	10	10	0	0	26	0	0
HGLibA_00680	ACTRT2	x	169	93	225	64	114	97	179	185	33
HGLibA_00681	ACTRT2	x	71	78	125	27	8	21	186	172	164
HGLibA_00682	ACTRT3	x	122	73	156	47	0	22	135	54	60
HGLibA_00683	ACTRT3	x	20	10	34	36	32	23	10	8	15
HGLibA_00684	ACTRT3	x	68	52	34	305	24	7	98	152	116
HGLibA_00685	ACVR1	x	189	176	290	103	228	2773	192	296	362
HGLibA_00686	ACVR1	x	79	130	171	15	14	308	157	101	76
HGLibA_00687	ACVR1	x	461	336	793	458	559	378	426	412	340
HGLibA_00688	ACVR1B	x	84	120	219	223	295	31	121	140	200
HGLibA_00689	ACVR1B	x	179	120	158	379	111	104	189	199	98
HGLibA_00690	ACVR1B	x	18	10	35	60	44	5	28	36	36
HGLibA_00691	ACVR1C	x	170	80	171	41	118	65	173	132	100
HGLibA_00692	ACVR1C	x	383	349	612	819	440	350	673	406	649
HGLibA_00693	ACVR1C	x	133	166	293	166	81	50	279	85	129
HGLibA_00694	ACVR2A	x	280	277	436	211	627	170	460	506	395
HGLibA_00695	ACVR2A	x	133	146	235	24	23	229	145	150	154
HGLibA_00696	ACVR2A	x	136	117	217	146	147	15	120	235	246
HGLibA_00697	ACVR2B	x	0	8	3	0	0	0	23	0	18
HGLibA_00698	ACVR2B	x	122	75	98	42	36	28	215	155	131
HGLibA_00699	ACVR2B	x	57	164	212	32	15	187	257	120	142
HGLibA_00700	ACVRL1	x	208	97	118	20	47	125	70	83	112
HGLibA_00701	ACVRL1	x	185	132	180	112	600	185	260	164	339
HGLibA_00702	ACVRL1	x	149	74	167	208	107	11	211	113	78
HGLibA_00703	ACY1	x	36	10	55	40	49	0	63	47	36
HGLibA_00704	ACY1	x	88	59	78	0	3	33	73	109	118
HGLibA_00705	ACY1	x	100	24	105	12	24	18	4	107	24
HGLibA_00706	ACY3	x	35	65	125	3	8	46	13	112	24
HGLibA_00707	ACY3	x	74	59	117	51	3	182	120	83	84
HGLibA_00708	ACY3	x	26	22	22	17	414	19	11	15	33
HGLibA_00709	ACYP1	x	214	143	240	344	250	179	205	311	299
HGLibA_00710	ACYP1	x	273	98	292	23	64	89	241	207	93
HGLibA_00711	ACYP1	x	80	91	191	85	65	34	157	131	245
HGLibA_00712	ACYP2	x	204	129	249	126	93	162	277	210	172
HGLibA_00713	ACYP2	x	109	55	162	1566	140	28	116	24	62
HGLibA_00714	ACYP2	x	39	13	40	0	3	5	7	43	16
HGLibA_00715	ADA	x	82	116	218	271	14	52	169	73	194
HGLibA_00716	ADA	x	199	144	364	721	16	408	467	247	335
HGLibA_00717	ADA	x	26	32	65	0	0	0	79	10	35
HGLibA_00718	ADAD1	x	366	157	370	377	63	831	739	378	824
HGLibA_00719	ADAD1	x	39	35	14	212	8	0	48	93	27
HGLibA_00720	ADAD1	x	42	21	13	0	0	0	56	5	0
HGLibA_00721	ADAD2	x	91	47	145	216	14	40	203	110	33
HGLibA_00722	ADAD2	x	190	139	322	40	70	53	243	262	148
HGLibA_00723	ADAD2	x	105	92	150	322	24	19	240	122	120
HGLibA_00724	ADAL	x	185	105	288	73	89	108	238	260	178
HGLibA_00725	ADAL	x	267	153	288	328	85	1688	314	277	447
HGLibA_00726	ADAL	x	53	56	97	0	10	44	39	99	53
HGLibA_00727	ADAM10	x	48	38	54	45	0	22	60	73	58
HGLibA_00728	ADAM10	x	73	32	53	0	4	718	20	4	18
HGLibA_00729	ADAM10	x	69	64	71	0	15	0	88	108	84
HGLibA_00730	ADAM11	x	202	109	185	76	53	83	103	44	125
HGLibA_00731	ADAM11	x	70	83	115	103	137	25	283	67	167
HGLibA_00732	ADAM11	x	206	136	248	25	53	319	97	272	193
HGLibA_00733	ADAM12	x	244	155	300	122	106	172	232	179	267
HGLibA_00734	ADAM12	x	107	63	121	305	1357	87	188	165	94
HGLibA_00735	ADAM12	x	89	56	139	112	35	308	180	88	144
HGLibA_00736	ADAM15	x	61	51	149	44	0	109	65	281	132
HGLibA_00737	ADAM15	x	59	35	79	593	10	8	280	60	42
HGLibA_00738	ADAM15	x	163	83	201	28	24	48	224	89	239
HGLibA_00739	ADAM17	x	258	180	375	25	114	94	413	456	439
HGLibA_00740	ADAM17	x	103	101	89	29	15	26	179	114	110
HGLibA_00741	ADAM17	x	385	122	357	224	52	276	481	434	493
HGLibA_00742	ADAM18	x	74	54	44	20	29	0	93	188	120
HGLibA_00743	ADAM18	x	195	151	216	32	42	491	318	411	239
HGLibA_00744	ADAM18	x	61	58	79	33	0	5	149	77	69
HGLibA_00745	ADAM19	x	199	171	214	148	238	61	223	406	171
HGLibA_00746	ADAM19	x	210	136	275	138	43	60	190	215	300
HGLibA_00747	ADAM19	x	0	4	15	21	0	0	0	12	5
HGLibA_00748	ADAM2	x	74	22	44	54	0	0	62	1	61
HGLibA_00749	ADAM2	x	56	52	128	15	4	654	40	23	138
HGLibA_00750	ADAM2	x	0	12	8	0	16	0	11	24	20
HGLibA_00751	ADAM20	x	138	48	225	376	6	96	109	143	112
HGLibA_00752	ADAM20	x	38	25	36	24	16	21	96	68	10
HGLibA_00753	ADAM20	x	223	82	204	149	57	446	144	114	105
HGLibA_00754	ADAM21	x	52	14	83	8	12	0	174	33	12
HGLibA_00755	ADAM21	x	130	57	104	29	0	34	80	112	335
HGLibA_00756	ADAM21	x	12	9	16	0	7	0	28	0	18
HGLibA_00757	ADAM22	x	174	86	200	137	70	39	398	210	89
HGLibA_00758	ADAM22	x	122	102	203	35	42	0	95	96	158
HGLibA_00759	ADAM22	x	148	111	161	284	149	47	175	201	123
HGLibA_00760	ADAM23	x	87	91	128	5	17	27	73	120	88
HGLibA_00761	ADAM23	x	113	48	83	48	93	280	30	100	74
HGLibA_00762	ADAM23	x	308	136	308	92	1671	228	286	302	324
HGLibA_00763	ADAM28	x	85	74	154	90	298	540	96	194	242
HGLibA_00764	ADAM28	x	184	56	122	17	8	46	140	79	103
HGLibA_00765	ADAM28	x	49	51	107	30	18	1317	75	80	64
HGLibA_00766	ADAM29	x	46	45	84	139	86	72	92	75	115
HGLibA_00767	ADAM29	x	119	112	220	74	41	79	378	222	222
HGLibA_00768	ADAM29	x	52	69	120	355	54	37	112	174	142
HGLibA_00769	ADAM30	x	101	94	136	156	98	31	183	132	158
HGLibA_00770	ADAM30	x	102	27	68	161	73	0	122	44	20
HGLibA_00771	ADAM30	x	153	98	222	96	49	21	306	238	283
HGLibA_00772	ADAM32	x	134	101	114	12	132	36	122	118	233
HGLibA_00773	ADAM32	x	433	317	452	1548	885	103	751	555	434
HGLibA_00774	ADAM32	x	58	60	92	38	6	38	42	123	141
HGLibA_00775	ADAM33	x	119	148	217	457	50	124	202	228	348
HGLibA_00776	ADAM33	x	152	162	169	107	94	51	202	125	193
HGLibA_00777	ADAM33	x	45	18	42	72	0	0	15	13	2
HGLibA_00778	ADAM7	x	91	91	107	76	46	122	483	89	97
HGLibA_00779	ADAM7	x	175	153	272	277	36	35	221	101	301
HGLibA_00780	ADAM7	x	63	69	71	68	0	13	52	58	36
HGLibA_00781	ADAM8	x	69	30	36	25	14	747	13	32	49
HGLibA_00782	ADAM8	x	59	27	71	500	103	2	65	27	14
HGLibA_00783	ADAM8	x	63	43	79	3	0	0	96	10	43
HGLibA_00784	ADAM9	x	47	10	57	0	0	40	11	21	0
HGLibA_00785	ADAM9	x	374	206	415	316	42	134	387	447	392
HGLibA_00786	ADAM9	x	40	31	21	23	8	21	20	11	10
HGLibA_00787	ADAMDEC1	x	166	71	161	39	28	97	104	99	69
HGLibA_00788	ADAMDEC1	x	112	78	134	19	182	0	205	121	71
HGLibA_00789	ADAMDEC1	x	90	52	127	446	95	41	142	52	102
HGLibA_00790	ADAMTS1	x	186	74	206	292	589	22	317	344	210
HGLibA_00791	ADAMTS1	x	323	148	303	745	406	51	188	362	235
HGLibA_00792	ADAMTS1	x	231	115	199	50	13	47	381	75	205
HGLibA_00793	ADAMTS10	x	249	65	227	39	28	30	226	139	157
HGLibA_00794	ADAMTS10	x	126	51	160	6	269	420	68	194	50
HGLibA_00795	ADAMTS10	x	123	83	183	559	278	13	251	51	57
HGLibA_00796	ADAMTS12	x	58	14	67	136	26	185	31	63	151
HGLibA_00797	ADAMTS12	x	111	87	136	38	173	82	145	169	39
HGLibA_00798	ADAMTS12	x	125	81	154	43	46	100	28	184	86
HGLibA_00799	ADAMTS13	x	112	104	229	39	29	43	185	81	127
HGLibA_00800	ADAMTS13	x	321	199	363	401	369	40	374	222	184
HGLibA_00801	ADAMTS13	x	62	69	205	127	12	87	151	107	117
HGLibA_00802	ADAMTS14	x	117	77	199	98	0	8	276	255	122
HGLibA_00803	ADAMTS14	x	112	26	82	19	53	19	80	19	63
HGLibA_00804	ADAMTS14	x	62	10	49	0	890	39	11	41	37
HGLibA_00805	ADAMTS15	x	19	24	28	22	0	8	103	31	2
HGLibA_00806	ADAMTS15	x	205	128	264	60	15	185	136	187	164
HGLibA_00807	ADAMTS15	x	13	7	41	0	5	0	31	4	0
HGLibA_00808	ADAMTS16	x	47	41	94	26	0	79	111	30	56
HGLibA_00809	ADAMTS16	x	332	281	451	488	440	524	435	300	421
HGLibA_00810	ADAMTS16	x	158	63	131	30	0	64	83	68	159
HGLibA_00811	ADAMTS17	x	174	92	193	60	14	108	87	161	147
HGLibA_00812	ADAMTS17	x	367	211	323	788	130	43	417	690	408
HGLibA_00813	ADAMTS17	x	42	3	23	21	10	17	79	5	8
HGLibA_00814	ADAMTS18	x	89	36	62	4	61	56	45	17	77
HGLibA_00815	ADAMTS18	x	249	163	286	186	95	696	223	291	282
HGLibA_00816	ADAMTS18	x	82	16	43	0	10	0	101	57	186
HGLibA_00817	ADAMTS19	x	217	155	303	70	119	12	297	236	180
HGLibA_00818	ADAMTS19	x	205	150	299	153	2936	844	557	355	339
HGLibA_00819	ADAMTS19	x	89	68	94	141	15	51	170	164	146
HGLibA_00820	ADAMTS2	x	50	45	78	24	0	4	81	100	48
HGLibA_00821	ADAMTS2	x	127	69	249	126	31	54	236	91	221
HGLibA_00822	ADAMTS2	x	174	94	171	79	91	456	184	199	77
HGLibA_00823	ADAMTS20	x	209	146	303	47	442	105	407	397	231
HGLibA_00824	ADAMTS20	x	32	24	76	15	8	18	60	106	27
HGLibA_00825	ADAMTS20	x	311	238	489	130	1990	44	284	480	435
HGLibA_00826	ADAMTS3	x	222	116	224	38	66	58	85	162	276
HGLibA_00827	ADAMTS3	x	19	19	29	0	0	0	0	19	68
HGLibA_00828	ADAMTS3	x	58	88	100	258	25	111	112	143	144
HGLibA_00829	ADAMTS4	x	63	92	144	6	32	53	98	178	107
HGLibA_00830	ADAMTS4	x	117	74	116	26	4	26	109	51	125
HGLibA_00831	ADAMTS4	x	83	15	16	16	0	9	102	70	69
HGLibA_00832	ADAMTS5	x	37	3	40	33	7	0	89	5	2
HGLibA_00833	ADAMTS5	x	130	57	100	44	48	0	108	66	42
HGLibA_00834	ADAMTS5	x	84	68	154	156	91	50	211	61	134
HGLibA_00835	ADAMTS6	x	8	6	21	0	0	0	0	15	5
HGLibA_00836	ADAMTS6	x	5	1	1	0	0	0	0	0	0
HGLibA_00837	ADAMTS6	x	159	82	165	23	56	39	215	329	160
HGLibA_00838	ADAMTS7	x	22	24	45	40	0	15	102	21	44
HGLibA_00839	ADAMTS7	x	47	66	75	202	41	1	132	44	67
HGLibA_00840	ADAMTS7	x	20	6	0	244	6	2	28	10	10
HGLibA_00841	ADAMTS8	x	148	75	157	13	87	37	294	221	70
HGLibA_00842	ADAMTS8	x	240	114	280	78	872	44	288	275	268
HGLibA_00843	ADAMTS8	x	83	63	176	151	8	1068	156	84	83
HGLibA_00844	ADAMTS9	x	54	44	95	36	14	0	130	38	43
HGLibA_00845	ADAMTS9	x	114	42	81	0	11	0	40	30	158
HGLibA_00846	ADAMTS9	x	201	128	313	1119	17	1025	328	266	215
HGLibA_00847	ADAMTSL1	x	202	147	275	581	464	118	276	454	364
HGLibA_00848	ADAMTSL1	x	216	91	168	21	129	91	184	188	89
HGLibA_00849	ADAMTSL1	x	48	83	103	202	33	11	159	201	94
HGLibA_00850	ADAMTSL2	x	151	110	139	194	23	10	86	80	169
HGLibA_00851	ADAMTSL2	x	368	165	446	96	215	64	479	343	386
HGLibA_00852	ADAMTSL2	x	65	95	143	76	13	524	233	127	142
HGLibA_00853	ADAMTSL3	x	66	44	69	3	6	5	74	95	128
HGLibA_00854	ADAMTSL3	x	9	46	0	85	0	0	0	14	4
HGLibA_00855	ADAMTSL3	x	114	78	163	23	16	260	111	60	66
HGLibA_00856	ADAMTSL4	x	214	133	286	78	321	188	257	216	197
HGLibA_00857	ADAMTSL4	x	30	14	36	17	40	0	52	14	21
HGLibA_00858	ADAMTSL4	x	127	123	181	86	34	59	102	281	332
HGLibA_00859	ADAMTSL5	x	50	36	82	57	54	14	82	67	40
HGLibA_00860	ADAMTSL5	x	44	17	58	14	0	21	15	90	45
HGLibA_00861	ADAMTSL5	x	84	42	119	0	100	14	44	81	24
HGLibA_00862	ADAP1	x	66	18	50	1	0	8	23	10	135
HGLibA_00863	ADAP1	x	430	143	320	484	53	118	436	355	202
HGLibA_00864	ADAP1	x	55	58	153	30	0	10	115	97	144
HGLibA_00865	ADAP2	x	16	6	55	22	899	0	9	138	11
HGLibA_00866	ADAP2	x	118	61	123	30	23	14	63	232	81
HGLibA_00867	ADAP2	x	50	32	37	0	5	0	23	13	12
HGLibA_00868	ADAR	x	109	118	246	220	20	41	145	70	197
HGLibA_00869	ADAR	x	211	211	212	77	30	35	397	235	382
HGLibA_00870	ADAR	x	126	113	199	238	44	122	218	207	188
HGLibA_00871	ADARB1	x	48	45	88	241	31	27	115	82	28
HGLibA_00872	ADARB1	x	32	59	88	46	52	2	103	141	33
HGLibA_00873	ADARB1	x	121	125	208	156	29	32	169	157	71
HGLibA_00874	ADARB2	x	30	32	57	7	4	262	24	15	22
HGLibA_00875	ADARB2	x	186	99	193	239	959	34	184	124	210
HGLibA_00876	ADARB2	x	191	106	344	22	33	104	206	314	245
HGLibA_00877	ADAT1	x	107	79	134	74	8	54	122	112	38
HGLibA_00878	ADAT1	x	103	93	131	16	233	27	114	146	172
HGLibA_00879	ADAT1	x	80	8	38	9	0	0	83	26	0
HGLibA_00880	ADAT2	x	82	43	57	90	0	334	47	21	34
HGLibA_00881	ADAT2	x	241	132	199	166	54	297	206	503	277
HGLibA_00882	ADAT2	x	132	52	93	0	11	69	255	49	30
HGLibA_00883	ADAT3	x	84	96	197	83	175	9	298	373	88
HGLibA_00884	ADAT3	x	91	48	107	57	107	24	72	31	156
HGLibA_00885	ADAT3	x	100	43	100	63	8	11	158	52	138
HGLibA_00886	ADC	x	210	103	169	48	314	298	89	62	161
HGLibA_00887	ADC	x	184	214	342	563	199	16	318	218	273
HGLibA_00888	ADC	x	168	68	84	60	47	0	99	128	70
HGLibA_00889	ADCK1	x	157	106	206	209	184	680	212	230	237
HGLibA_00890	ADCK1	x	29	44	87	13	63	19	39	139	130
HGLibA_00891	ADCK1	x	90	132	222	172	91	21	180	232	155
HGLibA_00892	ADCK2	x	175	95	161	52	68	234	245	197	163
HGLibA_00893	ADCK2	x	159	90	129	236	67	58	185	120	123
HGLibA_00894	ADCK2	x	232	170	379	197	158	129	548	324	454
HGLibA_00895	ADCK3	x	110	83	142	36	27	41	99	75	102
HGLibA_00896	ADCK3	x	34	25	67	7	37	0	98	54	72
HGLibA_00897	ADCK3	x	58	53	66	13	6	15	84	129	118
HGLibA_00898	ADCK4	x	103	97	200	30	48	28	184	105	112
HGLibA_00899	ADCK4	x	137	77	209	78	14	19	190	85	113
HGLibA_00900	ADCK4	x	94	57	171	46	16	5	72	190	159
HGLibA_00901	ADCK5	x	201	139	233	253	240	40	135	259	271
HGLibA_00902	ADCK5	x	147	111	208	108	1107	93	237	345	79
HGLibA_00903	ADCK5	x	91	90	156	138	38	0	131	172	87
HGLibA_00904	ADCY1	x	72	70	86	141	34	0	86	58	107
HGLibA_00905	ADCY1	x	129	149	262	31	131	214	267	586	218
HGLibA_00906	ADCY1	x	60	30	83	0	104	9	16	68	32
HGLibA_00907	ADCY10	x	106	44	98	16	1385	20	14	50	97
HGLibA_00908	ADCY10	x	69	39	127	24	8	0	75	50	66
HGLibA_00909	ADCY10	x	84	30	75	18	33	88	74	61	48
HGLibA_00910	ADCY2	x	174	110	154	948	53	25	187	126	244
HGLibA_00911	ADCY2	x	137	42	156	50	88	158	266	101	173
HGLibA_00912	ADCY2	x	16	31	91	4	4	8	73	35	75
HGLibA_00913	ADCY3	x	139	103	168	34	40	41	95	229	125
HGLibA_00914	ADCY3	x	138	166	264	84	238	11	317	344	144
HGLibA_00915	ADCY3	x	122	51	57	18	3	0	96	32	47
HGLibA_00916	ADCY4	x	10	7	9	0	88	0	0	21	0
HGLibA_00917	ADCY4	x	0	0	0	0	1	0	0	5	0
HGLibA_00918	ADCY4	x	100	62	89	199	293	111	185	25	149
HGLibA_00919	ADCY5	x	142	70	145	14	391	280	85	127	139
HGLibA_00920	ADCY5	x	52	67	141	512	34	31	90	83	84
HGLibA_00921	ADCY5	x	143	154	217	386	80	78	467	437	175
HGLibA_00922	ADCY6	x	187	97	173	210	49	11	128	125	87
HGLibA_00923	ADCY6	x	196	91	150	362	29	28	196	114	99
HGLibA_00924	ADCY6	x	57	21	73	26	1	11	96	51	75
HGLibA_00925	ADCY7	x	4	30	29	16	0	1	5	34	5
HGLibA_00926	ADCY7	x	66	59	111	22	59	35	74	158	174
HGLibA_00927	ADCY7	x	89	58	123	0	0	1	52	38	8
HGLibA_00928	ADCY8	x	286	173	336	47	32	36	150	331	216
HGLibA_00929	ADCY8	x	95	92	130	234	110	38	247	199	208
HGLibA_00930	ADCY8	x	112	52	130	35	65	7	141	189	98
HGLibA_00931	ADCY9	x	157	98	245	92	64	12	190	121	233
HGLibA_00932	ADCY9	x	695	407	847	219	113	96	563	484	673
HGLibA_00933	ADCY9	x	146	73	175	286	64	355	400	116	308
HGLibA_00934	ADCYAP1	x	57	42	72	279	49	0	3	47	174
HGLibA_00935	ADCYAP1	x	72	58	197	9	50	341	108	65	113
HGLibA_00936	ADCYAP1	x	48	34	91	5	80	23	75	45	111
HGLibA_00937	ADCYAP1R1	x	63	33	55	15	0	8	111	57	72
HGLibA_00938	ADCYAP1R1	x	35	13	23	10	0	0	9	22	84
HGLibA_00939	ADCYAP1R1	x	81	62	113	30	10	240	159	137	275
HGLibA_00940	ADD1	x	52	34	52	22	288	11	28	40	96
HGLibA_00941	ADD1	x	252	105	322	176	12	32	398	176	198
HGLibA_00942	ADD1	x	162	97	191	98	207	18	170	69	239
HGLibA_00943	ADD2	x	224	154	345	43	468	43	362	279	273
HGLibA_00944	ADD2	x	220	98	197	122	894	87	283	127	176
HGLibA_00945	ADD2	x	236	134	198	459	289	91	248	190	267
HGLibA_00946	ADD3	x	72	58	102	52	122	99	114	185	246
HGLibA_00947	ADD3	x	281	128	200	65	161	15	130	111	198
HGLibA_00948	ADD3	x	20	29	31	3	0	0	42	10	42
HGLibA_00949	ADH1A	x	27	56	51	16	159	61	84	29	31
HGLibA_00950	ADH1A	x	54	29	98	2111	0	46	24	64	16
HGLibA_00951	ADH1A	x	301	200	392	486	404	78	237	384	179
HGLibA_00952	ADH1B	x	326	144	346	111	154	90	638	401	311
HGLibA_00953	ADH1B	x	212	154	467	131	28	36	343	291	291
HGLibA_00954	ADH1B	x	328	184	363	47	786	168	382	285	236
HGLibA_00955	ADH4	x	149	63	211	294	12	40	148	69	196
HGLibA_00956	ADH4	x	144	121	399	92	30	16	147	194	250
HGLibA_00957	ADH4	x	72	78	156	22	65	20	105	67	91
HGLibA_00958	ADH5	x	217	114	208	238	19	16	309	287	144
HGLibA_00959	ADH5	x	71	52	68	6	10	25	70	59	38
HGLibA_00960	ADH5	x	212	112	262	430	76	16	449	407	212
HGLibA_00961	ADH6	x	56	27	114	48	45	0	36	88	44
HGLibA_00962	ADH6	x	162	88	223	29	1394	225	149	201	199
HGLibA_00963	ADH6	x	74	42	95	78	93	21	158	18	52
HGLibA_00964	ADH7	n	11	32	26	0	0	73	36	65	26
HGLibA_00965	ADH7	n	27	64	87	54	8	1554	55	68	38
HGLibA_00966	ADH7	n	52	43	92	58	32	28	129	51	110
HGLibA_00967	ADHFE1	x	48	44	106	62	5	12	76	78	245
HGLibA_00968	ADHFE1	x	160	98	267	34	92	42	193	121	161
HGLibA_00969	ADHFE1	x	17	11	18	0	0	7	53	23	21
HGLibA_00970	ADI1	x	186	68	163	44	253	11	92	103	216
HGLibA_00971	ADI1	x	209	131	166	334	12	83	209	181	285
HGLibA_00972	ADI1	x	88	67	124	38	11	5	129	87	97
HGLibA_00973	ADIG	x	121	52	155	89	56	303	81	159	75
HGLibA_00974	ADIG	x	66	60	49	25	8	119	39	79	67
HGLibA_00975	ADIG	x	255	119	291	72	37	82	191	198	384
HGLibA_00976	ADIPOQ	x	80	27	51	11	89	34	115	163	38
HGLibA_00977	ADIPOQ	x	75	122	155	82	120	32	216	216	162
HGLibA_00978	ADIPOQ	x	233	75	230	183	12	176	120	308	238
HGLibA_00979	ADIPOR1	x	55	59	161	141	50	293	117	62	96
HGLibA_00980	ADIPOR1	x	132	98	172	113	76	154	439	170	164
HGLibA_00981	ADIPOR1	x	71	21	52	7	0	79	115	80	39
HGLibA_00982	ADIPOR2	x	121	62	111	0	27	38	97	154	104
HGLibA_00983	ADIPOR2	x	218	152	355	229	142	51	301	172	175
HGLibA_00984	ADIPOR2	x	61	48	81	23	0	26	42	119	93
HGLibA_00985	ADIRF	x	56	57	83	47	34	1	138	30	62
HGLibA_00986	ADIRF	x	234	99	184	104	37	67	350	211	209
HGLibA_00987	ADIRF	x	75	138	153	50	14	0	206	164	69
HGLibA_00988	ADK	x	123	47	116	95	191	30	335	119	122
HGLibA_00989	ADK	x	126	56	99	9	7	0	90	66	39
HGLibA_00990	ADK	x	121	65	142	119	228	100	202	131	88
HGLibA_00991	ADM	x	136	44	72	241	11	0	20	37	73
HGLibA_00992	ADM	x	174	108	226	101	28	52	360	161	247
HGLibA_00993	ADM	x	263	164	217	375	257	92	182	171	149
HGLibA_00994	ADM2	x	17	40	117	13	14	7	154	40	33
HGLibA_00995	ADM2	x	10	1	7	1	53	0	0	10	11
HGLibA_00996	ADM2	x	67	45	107	11	2	0	26	46	53
HGLibA_00997	ADM5	x	46	17	70	15	128	0	78	16	50
HGLibA_00998	ADM5	x	114	68	169	9	139	26	84	78	132
HGLibA_00999	ADM5	x	3	6	23	0	0	0	2	57	6
HGLibA_01000	ADNP	x	35	7	40	2	0	0	35	8	35
HGLibA_01001	ADNP	x	209	97	208	211	81	113	475	101	217
HGLibA_01002	ADNP	x	44	31	98	103	17	9	104	61	84
HGLibA_01003	ADNP2	x	182	142	315	308	17	116	317	296	279
HGLibA_01004	ADNP2	x	13	15	14	0	0	0	37	16	41
HGLibA_01005	ADNP2	x	47	33	46	10	10	27	89	150	41
HGLibA_01006	ADO	x	108	27	80	5	19	0	12	8	8
HGLibA_01007	ADO	x	19	29	38	8	0	119	101	40	81
HGLibA_01008	ADO	x	16	40	98	0	78	0	137	27	104
HGLibA_01009	ADORA1	x	24	5	16	0	0	0	3	0	82
HGLibA_01010	ADORA1	x	63	50	162	43	23	18	79	75	94
HGLibA_01011	ADORA1	x	269	210	291	148	387	424	365	259	406
HGLibA_01012	ADORA2A	x	89	69	139	63	32	604	209	141	203
HGLibA_01013	ADORA2A	x	147	101	168	103	0	10	96	129	175
HGLibA_01014	ADORA2A	x	184	136	184	33	37	35	155	121	218
HGLibA_01015	ADORA2B	x	132	95	146	210	25	27	316	112	176
HGLibA_01016	ADORA2B	x	141	57	59	3	30	13	188	45	65
HGLibA_01017	ADORA2B	x	170	82	163	215	462	455	171	167	299
HGLibA_01018	ADORA3	x	175	138	241	64	233	828	249	159	253
HGLibA_01019	ADORA3	x	139	120	192	608	0	34	156	46	156
HGLibA_01020	ADORA3	x	50	24	97	20	0	5	49	55	60
HGLibA_01021	ADPGK	x	97	95	198	27	30	537	55	180	157
HGLibA_01022	ADPGK	x	187	180	283	186	40	540	368	514	450
HGLibA_01023	ADPGK	x	131	76	109	218	10	34	222	38	75
HGLibA_01024	ADPRH	x	93	34	87	0	8	28	45	50	23
HGLibA_01025	ADPRH	x	227	111	328	443	17	95	315	151	184
HGLibA_01026	ADPRH	x	63	18	38	0	7	8	3	28	9
HGLibA_01027	ADPRHL1	x	35	72	116	46	18	29	58	76	86
HGLibA_01028	ADPRHL1	x	233	213	414	0	106	362	113	41	163
HGLibA_01029	ADPRHL1	x	70	109	164	66	53	74	255	351	148
HGLibA_01030	ADPRHL2	x	258	145	235	26	106	166	313	282	285
HGLibA_01031	ADPRHL2	x	83	41	92	41	48	26	314	134	131
HGLibA_01032	ADPRHL2	x	186	90	257	197	103	104	374	231	172
HGLibA_01033	ADPRM	x	126	84	216	28	615	19	141	131	149
HGLibA_01034	ADPRM	x	109	56	165	71	17	10	95	94	100
HGLibA_01035	ADPRM	x	62	26	72	0	0	34	17	82	40
HGLibA_01036	ADRA1A	x	73	20	52	29	38	21	16	67	63
HGLibA_01037	ADRA1A	x	279	142	278	638	44	88	206	322	410
HGLibA_01038	ADRA1A	x	0	4	34	0	0	114	28	4	0
HGLibA_01039	ADRA1B	x	290	222	390	106	283	34	377	323	362
HGLibA_01040	ADRA1B	x	34	29	64	13	125	13	43	29	96
HGLibA_01041	ADRA1B	x	81	52	86	30	0	14	25	39	19
HGLibA_01042	ADRA1D	x	77	90	144	245	69	12	242	314	138
HGLibA_01043	ADRA1D	x	330	172	303	72	33	1257	257	250	267
HGLibA_01044	ADRA1D	x	64	27	123	19	48	0	59	62	62
HGLibA_01045	ADRA2A	x	76	70	150	78	10	145	217	21	130
HGLibA_01046	ADRA2A	x	54	109	184	55	234	26	152	308	142
HGLibA_01047	ADRA2A	x	184	139	155	371	138	13	146	272	256
HGLibA_01048	ADRA2B	x	75	57	99	53	20	0	42	106	12
HGLibA_01049	ADRA2B	x	172	127	195	114	178	297	198	163	142
HGLibA_01050	ADRA2B	x	108	77	189	157	105	16	121	69	50
HGLibA_01051	ADRA2C	x	80	51	55	948	8	0	92	71	73
HGLibA_01052	ADRA2C	x	92	27	32	9	85	0	34	75	46
HGLibA_01053	ADRA2C	x	192	122	214	191	58	0	138	162	95
HGLibA_01054	ADRB1	x	120	91	109	13	272	4	108	165	149
HGLibA_01055	ADRB1	x	83	57	129	22	18	9	15	18	27
HGLibA_01056	ADRB1	x	78	67	91	0	17	48	68	176	136
HGLibA_01057	ADRB2	x	80	79	94	29	933	53	180	209	129
HGLibA_01058	ADRB2	x	289	176	290	76	102	56	275	268	193
HGLibA_01059	ADRB2	x	9	12	12	13	29	34	32	59	23
HGLibA_01060	ADRB3	x	169	97	276	90	624	20	129	229	194
HGLibA_01061	ADRB3	x	47	27	58	36	140	0	66	40	24
HGLibA_01062	ADRB3	x	21	23	34	13	0	14	20	14	81
HGLibA_01063	ADRBK1	x	222	158	213	17	203	34	139	150	174
HGLibA_01064	ADRBK1	x	125	58	96	176	36	6	56	85	75
HGLibA_01065	ADRBK1	x	84	25	110	423	1	21	160	112	104
HGLibA_01066	ADRBK2	x	79	78	173	0	82	6	32	60	96
HGLibA_01067	ADRBK2	x	59	78	106	8	428	32	254	180	138
HGLibA_01068	ADRBK2	x	120	66	81	53	118	132	62	109	72
HGLibA_01069	ADRM1	x	121	150	329	578	198	190	418	160	202
HGLibA_01070	ADRM1	x	195	137	245	388	75	89	346	203	130
HGLibA_01071	ADRM1	x	7	4	10	3	0	0	0	0	11
HGLibA_01072	ADSL	x	145	118	238	79	57	250	260	244	91
HGLibA_01073	ADSL	x	70	34	133	18	17	111	24	93	81
HGLibA_01074	ADSL	x	137	110	192	241	339	23	112	206	263
HGLibA_01075	ADSS	x	68	42	91	85	42	34	130	162	102
HGLibA_01076	ADSS	x	95	45	55	17	143	47	48	87	88
HGLibA_01077	ADSS	x	167	32	132	65	22	39	123	43	153
HGLibA_01078	ADSSL1	x	65	46	75	410	0	5	51	82	2
HGLibA_01079	ADSSL1	x	526	297	497	572	93	125	433	329	250
HGLibA_01080	ADSSL1	x	68	40	143	88	8	15	248	61	230
HGLibA_01081	ADTRP	x	56	45	83	58	8	16	34	48	34
HGLibA_01082	ADTRP	x	241	76	143	273	348	26	267	174	137
HGLibA_01083	ADTRP	x	288	118	322	40	3	183	178	179	382
HGLibA_01084	AEBP1	x	74	74	157	26	82	49	122	108	145
HGLibA_01085	AEBP1	x	60	53	71	0	12	9	71	50	35
HGLibA_01086	AEBP1	x	20	21	75	73	24	79	63	39	78
HGLibA_01087	AEBP2	x	76	59	73	47	97	270	95	97	51
HGLibA_01088	AEBP2	x	75	77	215	8	19	1	96	84	4
HGLibA_01089	AEBP2	x	74	65	145	0	0	25	58	20	51
HGLibA_01090	AEN	x	185	151	217	38	28	162	279	205	265
HGLibA_01091	AEN	x	24	11	43	0	0	8	32	4	3
HGLibA_01092	AEN	x	109	144	153	65	460	82	281	281	137
HGLibA_01093	AES	x	201	127	215	122	57	391	158	199	328
HGLibA_01094	AES	x	84	39	120	26	15	47	42	126	114
HGLibA_01095	AES	x	101	97	225	36	22	15	172	243	329
HGLibA_01096	AFAP1	x	271	106	235	77	45	262	147	129	92
HGLibA_01097	AFAP1	x	127	62	84	81	109	35	52	144	69
HGLibA_01098	AFAP1	x	105	48	155	59	38	16	171	137	190
HGLibA_01099	AFAP1L1	x	62	35	117	11	67	47	53	45	45
HGLibA_01100	AFAP1L1	x	163	64	214	55	73	95	234	175	113
HGLibA_01101	AFAP1L1	x	51	60	76	8	0	16	47	107	80
HGLibA_01102	AFAP1L2	x	99	52	89	48	4	48	122	101	41
HGLibA_01103	AFAP1L2	x	25	23	91	8	0	24	89	92	65
HGLibA_01104	AFAP1L2	x	265	142	295	22	43	6	166	218	130
HGLibA_01105	AFF1	x	143	109	182	114	129	10	145	351	284
HGLibA_01106	AFF1	x	138	137	216	45	188	17	196	131	145
HGLibA_01107	AFF1	x	13	0	11	6	11	0	19	8	5
HGLibA_01108	AFF2	x	104	70	148	32	55	350	41	160	126
HGLibA_01109	AFF2	x	67	35	85	42	8	5	94	60	170
HGLibA_01110	AFF2	x	58	54	81	33	12	170	52	109	237
HGLibA_01111	AFF3	x	13	21	48	8	42	7	68	51	5
HGLibA_01112	AFF3	x	155	192	235	118	54	72	179	222	148
HGLibA_01113	AFF3	x	165	123	205	604	190	124	123	86	75
HGLibA_01114	AFF4	x	54	49	74	4	76	9	67	83	19
HGLibA_01115	AFF4	x	39	18	44	0	9	0	33	37	0
HGLibA_01116	AFF4	x	159	152	262	74	255	47	348	237	444
HGLibA_01117	AFG3L2	x	47	30	48	32	17	39	46	63	39
HGLibA_01118	AFG3L2	x	65	48	122	7	6	0	69	34	53
HGLibA_01119	AFG3L2	x	69	48	70	23	93	7	77	48	58
HGLibA_01120	AFM	x	72	42	70	47	8	198	28	97	27
HGLibA_01121	AFM	x	231	191	300	387	173	302	496	394	290
HGLibA_01122	AFM	x	76	72	158	31	17	19	97	140	123
HGLibA_01123	AFMID	x	1	22	51	7	0	0	20	79	29
HGLibA_01124	AFMID	x	103	111	133	72	38	16	141	135	50
HGLibA_01125	AFMID	x	283	143	213	74	20	70	236	155	261
HGLibA_01126	AFP	x	119	54	179	37	6	46	142	77	58
HGLibA_01127	AFP	x	260	136	267	102	420	96	292	371	310
HGLibA_01128	AFP	x	12	22	97	70	29	0	82	64	65
HGLibA_01129	AFTPH	x	25	29	97	34	71	75	108	35	84
HGLibA_01130	AFTPH	x	187	150	195	157	67	32	352	212	117
HGLibA_01131	AFTPH	x	256	148	246	20	106	44	210	476	137
HGLibA_01132	AGA	x	68	43	84	27	40	24	86	82	43
HGLibA_01133	AGA	x	215	115	233	114	101	387	172	218	348
HGLibA_01134	AGA	x	42	18	47	32	17	10	124	34	56
HGLibA_01135	AGAP1	x	120	92	228	85	10	2269	228	157	214
HGLibA_01136	AGAP1	x	67	40	49	26	24	6	143	132	118
HGLibA_01137	AGAP1	x	25	24	46	0	0	6	0	55	44
HGLibA_01138	AGAP11	x	82	85	151	74	43	81	179	95	95
HGLibA_01139	AGAP11	x	256	153	334	181	119	53	282	369	338
HGLibA_01140	AGAP11	x	118	63	69	54	138	46	65	179	66
HGLibA_01141	AGAP2	x	152	115	119	958	10	16	205	158	42
HGLibA_01142	AGAP2	x	158	90	108	31	21	256	102	124	88
HGLibA_01143	AGAP2	x	237	121	192	135	60	198	367	250	123
HGLibA_01144	AGAP3	x	101	92	154	24	4	10	76	67	88
HGLibA_01145	AGAP3	x	230	75	213	156	65	75	325	171	263
HGLibA_01146	AGAP3	x	154	105	165	47	33	54	125	161	147
HGLibA_01150	AGAP5	x	102	42	154	890	0	0	93	25	14
HGLibA_01153	AGAP6	x	113	34	69	6	28	301	62	85	18
HGLibA_01154	AGAP6	x	86	53	75	11	0	0	43	4	73
HGLibA_01159;HGLibA_01156;HGLibA_01152;HGLibA_01147	AGAP8;AGAP7;AGAP5;AGAP4	x	227	201	253	0	26	6	24	42	12
HGLibA_01161;HGLibA_01158;HGLibA_01149	AGAP8;AGAP7;AGAP4	x	374	209	441	935	69	79	256	149	309
HGLibA_01162;HGLibA_01160;HGLibA_01157;HGLibA_01155;HGLibA_01151;HGLibA_01148	AGAP9;AGAP8;AGAP7;AGAP6;AGAP5;AGAP4	x	1341	899	1640	409	224	177	708	473	616
HGLibA_01163	AGAP9	x	84	56	140	167	10	0	23	9	5
HGLibA_01164	AGAP9	x	34	41	110	64	152	29	17	28	4
HGLibA_01165	AGBL1	x	123	190	300	172	426	171	270	197	344
HGLibA_01166	AGBL1	x	122	103	129	152	87	16	171	91	193
HGLibA_01167	AGBL1	x	73	20	59	13	0	14	76	63	53
HGLibA_01168	AGBL2	x	57	43	59	43	83	32	58	18	97
HGLibA_01169	AGBL2	x	61	50	122	25	40	13	56	96	170
HGLibA_01170	AGBL2	x	190	123	313	184	738	163	273	222	341
HGLibA_01171	AGBL3	x	224	195	218	84	26	42	202	183	91
HGLibA_01172	AGBL3	x	194	156	361	120	1309	5	475	322	139
HGLibA_01173	AGBL3	x	180	126	208	109	23	80	269	263	270
HGLibA_01174	AGBL4	x	247	83	250	92	142	767	129	186	271
HGLibA_01175	AGBL4	x	129	81	88	163	22	176	199	120	189
HGLibA_01176	AGBL4	x	59	50	118	15	42	59	95	110	89
HGLibA_01177	AGBL5	x	250	179	217	93	28	94	173	202	183
HGLibA_01178	AGBL5	x	27	16	46	0	857	17	44	136	61
HGLibA_01179	AGBL5	x	122	46	112	46	9	16	84	144	114
HGLibA_01180	AGER	x	206	133	172	43	49	52	282	193	310
HGLibA_01181	AGER	x	100	80	166	51	8	23	139	26	188
HGLibA_01182	AGER	x	121	67	109	62	27	117	46	140	101
HGLibA_01183	AGFG1	x	0	21	20	4	0	0	30	17	14
HGLibA_01184	AGFG1	x	56	82	169	25	421	23	160	112	132
HGLibA_01185	AGFG1	x	156	92	156	394	83	0	214	192	78
HGLibA_01186	AGFG2	x	115	127	206	271	432	800	202	185	213
HGLibA_01187	AGFG2	x	149	101	156	243	316	17	141	91	162
HGLibA_01188	AGFG2	x	78	24	105	8	27	15	1	36	22
HGLibA_01189	AGGF1	x	68	42	51	748	0	0	184	83	137
HGLibA_01190	AGGF1	x	73	78	135	16	5	0	12	60	23
HGLibA_01191	AGGF1	x	88	63	113	218	13	37	156	67	52
HGLibA_01192	AGK	x	235	182	241	107	109	72	295	398	273
HGLibA_01193	AGK	x	233	141	202	152	38	16	236	247	121
HGLibA_01194	AGK	x	276	249	380	27	270	138	89	275	210
HGLibA_01195	AGL	x	32	44	68	6	0	40	96	8	95
HGLibA_01196	AGL	x	80	20	58	0	11	48	22	8	24
HGLibA_01197	AGL	x	146	123	135	45	335	53	275	277	260
HGLibA_01198	AGMAT	x	118	71	169	75	215	94	173	215	123
HGLibA_01199	AGMAT	x	206	97	304	293	247	413	345	157	186
HGLibA_01200	AGMAT	x	99	39	119	207	17	1420	25	15	74
HGLibA_01201	AGMO	x	184	73	101	52	54	0	175	133	70
HGLibA_01202	AGMO	x	271	143	274	39	63	29	160	166	124
HGLibA_01203	AGMO	x	9	14	63	0	9	32	23	40	20
HGLibA_01204	AGO1	x	354	144	253	22	12	28	144	180	142
HGLibA_01205	AGO1	x	220	113	197	77	46	505	153	233	211
HGLibA_01206	AGO1	x	79	66	81	14	35	0	43	69	141
HGLibA_01207	AGO2	x	77	67	144	24	30	10	30	137	71
HGLibA_01208	AGO2	x	28	23	125	0	0	14	47	79	49
HGLibA_01209	AGO2	x	113	46	121	1251	0	55	16	101	40
HGLibA_01210	AGO3	x	73	52	177	302	55	13	107	148	56
HGLibA_01211	AGO3	x	42	27	124	6	0	11	41	54	3
HGLibA_01212	AGO3	x	76	57	159	108	13	0	221	154	169
HGLibA_01213	AGO4	x	50	37	121	64	26	0	127	86	169
HGLibA_01214	AGO4	x	103	83	141	124	27	379	171	190	187
HGLibA_01215	AGO4	x	58	132	207	441	25	1018	187	75	110
HGLibA_01216	AGPAT1	x	129	126	253	1169	311	269	183	180	217
HGLibA_01217	AGPAT1	x	68	74	224	57	273	122	160	157	134
HGLibA_01218	AGPAT1	x	163	99	176	199	15	12	187	151	41
HGLibA_01219	AGPAT2	x	30	46	120	0	7	15	24	31	20
HGLibA_01220	AGPAT2	x	40	71	129	228	17	396	118	69	165
HGLibA_01221	AGPAT2	x	265	108	336	149	50	48	234	152	195
HGLibA_01222	AGPAT3	x	152	90	137	187	46	52	217	95	94
HGLibA_01223	AGPAT3	x	193	174	309	164	144	34	262	221	259
HGLibA_01224	AGPAT3	x	110	111	193	169	194	52	261	167	86
HGLibA_01225	AGPAT4	x	124	121	163	290	141	49	307	121	263
HGLibA_01226	AGPAT4	x	72	44	104	5	0	21	143	47	166
HGLibA_01227	AGPAT4	x	7	12	20	0	0	5	25	55	47
HGLibA_01228	AGPAT5	x	91	22	72	111	38	18	120	90	79
HGLibA_01229	AGPAT5	x	80	40	177	87	26	49	46	106	54
HGLibA_01230	AGPAT5	x	10	0	0	0	10	0	23	0	0
HGLibA_01231	AGPAT6	x	79	76	117	31	0	17	157	122	43
HGLibA_01232	AGPAT6	x	134	95	203	63	1016	130	290	298	190
HGLibA_01233	AGPAT6	x	44	45	91	30	126	31	61	219	48
HGLibA_01234	AGPAT9	x	38	29	67	64	32	13	104	40	77
HGLibA_01235	AGPAT9	x	142	69	145	101	81	30	145	205	212
HGLibA_01236	AGPAT9	x	101	38	92	64	30	70	154	42	116
HGLibA_01238	AGPHD1	x	39	40	93	183	8	38	146	29	101
HGLibA_01240	AGPS	x	107	57	131	68	208	0	211	147	127
HGLibA_01241	AGPS	x	194	60	180	229	38	500	128	221	206
HGLibA_01242	AGPS	x	89	51	87	26	60	6	232	114	109
HGLibA_01243	AGR2	x	144	96	270	172	455	49	318	208	291
HGLibA_01244	AGR2	x	78	60	79	0	0	48	36	65	96
HGLibA_01245	AGR2	x	37	61	117	16	52	537	109	93	78
HGLibA_01246	AGR3	x	141	62	142	59	467	94	274	155	81
HGLibA_01247	AGR3	x	29	48	104	5	309	0	50	45	20
HGLibA_01248	AGR3	x	55	30	67	15	37	40	129	159	107
HGLibA_01249	AGRN	x	80	63	98	0	32	18	12	112	49
HGLibA_01250	AGRN	x	148	72	184	103	50	42	171	213	145
HGLibA_01251	AGRN	x	70	33	90	0	6	0	48	96	14
HGLibA_01252	AGRP	x	278	153	319	331	81	82	446	385	195
HGLibA_01253	AGRP	x	128	130	160	72	38	128	158	190	165
HGLibA_01254	AGRP	x	175	113	255	336	74	248	448	267	280
HGLibA_01255	AGT	x	167	94	250	83	16	55	146	156	141
HGLibA_01256	AGT	x	46	66	90	30	22	50	72	106	54
HGLibA_01257	AGT	x	19	18	21	0	0	16	11	0	24
HGLibA_01258	AGTPBP1	x	78	65	132	17	18	131	161	188	136
HGLibA_01259	AGTPBP1	x	152	87	259	125	79	580	131	187	166
HGLibA_01260	AGTPBP1	x	91	43	109	10	30	161	50	59	23
HGLibA_01261	AGTR1	x	149	89	125	5	33	59	544	239	163
HGLibA_01262	AGTR1	x	144	123	173	547	16	74	238	170	527
HGLibA_01263	AGTR1	x	133	42	120	12	86	296	157	125	44
HGLibA_01264	AGTR2	x	91	42	129	72	192	269	38	94	154
HGLibA_01265	AGTR2	x	227	125	278	41	18	118	249	160	187
HGLibA_01266	AGTR2	x	157	103	202	33	88	61	240	175	194
HGLibA_01267	AGTRAP	x	37	26	15	180	0	53	21	38	25
HGLibA_01268	AGTRAP	x	250	147	411	193	250	39	201	457	273
HGLibA_01269	AGTRAP	x	135	73	141	1089	3	13	111	30	139
HGLibA_01270	AGXT	x	21	8	16	0	5	0	2	28	16
HGLibA_01271	AGXT	x	174	126	271	179	108	344	206	267	307
HGLibA_01272	AGXT	x	73	39	56	42	40	0	163	80	24
HGLibA_01273	AGXT2	x	63	93	98	29	0	49	160	43	108
HGLibA_01274	AGXT2	x	40	26	73	11	8	0	19	41	6
HGLibA_01275	AGXT2	x	204	135	219	52	75	54	145	238	324
HGLibA_01277	AGXT2L1	x	127	114	189	119	87	82	350	261	246
HGLibA_01278	AGXT2L1	x	76	59	82	31	1578	38	75	123	10
HGLibA_01282	AHCTF1	x	40	31	87	4	7	0	43	47	82
HGLibA_01283	AHCTF1	x	327	248	480	899	828	959	445	305	275
HGLibA_01284	AHCTF1	x	115	62	118	20	92	29	141	71	45
HGLibA_01285	AHCY	x	258	128	255	94	88	66	340	389	176
HGLibA_01286	AHCY	x	464	180	458	291	194	92	389	276	539
HGLibA_01287	AHCY	x	144	90	96	11	362	41	54	19	41
HGLibA_01288	AHCYL1	x	242	122	245	66	41	214	234	132	445
HGLibA_01289	AHCYL1	x	3	6	37	0	0	0	27	4	26
HGLibA_01290	AHCYL1	x	164	33	73	13	23	6	111	134	73
HGLibA_01291	AHCYL2	x	121	91	152	1	296	0	149	126	133
HGLibA_01292	AHCYL2	x	150	71	164	52	88	84	248	96	226
HGLibA_01293	AHCYL2	x	41	108	93	13	250	22	109	108	222
HGLibA_01294	AHDC1	x	9	17	35	0	31	0	51	1	21
HGLibA_01295	AHDC1	x	91	91	165	220	47	22	218	130	155
HGLibA_01296	AHDC1	x	27	57	88	10	6	12	17	41	70
HGLibA_01297	AHI1	x	125	117	273	1120	1048	34	311	208	218
HGLibA_01298	AHI1	x	169	48	167	85	61	441	120	98	104
HGLibA_01299	AHI1	x	30	13	22	6	0	0	36	26	2
HGLibA_01300	AHNAK	x	174	224	267	194	28	216	301	227	251
HGLibA_01301	AHNAK	x	303	138	357	404	70	68	259	348	297
HGLibA_01302	AHNAK	x	140	77	223	64	16	0	120	66	106
HGLibA_01303	AHNAK2	x	159	70	131	14	9	28	108	62	78
HGLibA_01304	AHNAK2	x	31	11	11	0	0	36	10	0	40
HGLibA_01305	AHNAK2	x	48	35	68	0	7	0	113	28	28
HGLibA_01306	AHR	x	97	31	38	16691	29	55	90	123	87
HGLibA_01307	AHR	x	150	126	298	110	185	28183	389	177	245
HGLibA_01308	AHR	x	20	16	45	953	6	0	200	55	75
HGLibA_01309	AHRR	x	226	151	160	123	15	30	218	251	229
HGLibA_01310	AHRR	x	332	192	427	46	72	342	417	306	367
HGLibA_01311	AHRR	x	31	40	81	0	0	12	66	62	52
HGLibA_01312	AHSA1	x	38	40	70	3	150	11	43	69	34
HGLibA_01313	AHSA1	x	104	135	187	18	70	65	215	70	161
HGLibA_01314	AHSA1	x	12	49	56	5	0	0	72	104	5
HGLibA_01315	AHSA2	x	78	64	99	11	33	45	245	76	92
HGLibA_01316	AHSA2	x	118	108	167	7	19	21	56	67	76
HGLibA_01317	AHSA2	x	110	47	134	29	31	12	57	76	149
HGLibA_01318	AHSG	x	148	66	157	44	4	10562	259	256	157
HGLibA_01319	AHSG	x	15	16	18	104	0	6	10	6	0
HGLibA_01320	AHSG	x	94	59	159	109	322	27	139	128	83
HGLibA_01321	AHSP	x	121	85	113	313	28	73	148	128	158
HGLibA_01322	AHSP	x	0	10	0	0	79	14	40	99	36
HGLibA_01323	AHSP	x	173	122	217	158	250	48	240	162	74
HGLibA_01324	AICDA	x	162	108	189	633	118	85	326	199	330
HGLibA_01325	AICDA	x	149	128	197	188	1429	52	231	158	249
HGLibA_01326	AICDA	x	141	111	264	110	57	203	212	336	139
HGLibA_01327	AIDA	x	221	78	292	367	435	184	423	399	282
HGLibA_01328	AIDA	x	128	46	125	570	6	14	73	88	96
HGLibA_01329	AIDA	x	25	6	17	0	0	0	7	26	16
HGLibA_01330	AIF1	x	120	57	91	2	28	32	91	44	199
HGLibA_01331	AIF1	x	139	129	216	34	0	35	174	100	112
HGLibA_01332	AIF1	x	173	48	190	83	82	162	194	92	191
HGLibA_01333	AIF1L	x	2	0	0	2	13	0	7	0	0
HGLibA_01334	AIF1L	x	184	84	225	30	102	201	113	178	231
HGLibA_01335	AIF1L	x	121	110	167	74	80	15	214	188	228
HGLibA_01336	AIFM1	x	99	53	181	56	43	0	39	100	129
HGLibA_01337	AIFM1	x	201	89	290	71	70	22	302	245	169
HGLibA_01338	AIFM1	x	42	58	51	0	0	0	30	66	53
HGLibA_01339	AIFM2	x	173	115	143	86	3	29	83	131	37
HGLibA_01340	AIFM2	x	29	4	3	0	0	0	0	5	0
HGLibA_01341	AIFM2	x	12	17	67	0	7	57	1	99	29
HGLibA_01342	AIFM3	x	166	124	310	86	191	44	282	126	334
HGLibA_01343	AIFM3	x	155	132	237	1163	2080	79	340	206	137
HGLibA_01344	AIFM3	x	148	56	150	47	69	84	110	84	85
HGLibA_01345	AIG1	x	61	38	88	12	28	17	118	81	106
HGLibA_01346	AIG1	x	177	109	270	984	232	46	321	229	273
HGLibA_01347	AIG1	x	36	15	61	28	19	12	20	18	88
HGLibA_01348	AIM1	x	204	128	188	40	157	418	258	425	202
HGLibA_01349	AIM1	x	18	7	10	32	7	5	4	1	11
HGLibA_01350	AIM1	x	32	58	111	14	15	0	35	51	13
HGLibA_01351	AIM2	x	237	95	305	98	3	819	218	116	209
HGLibA_01352	AIM2	x	0	14	17	0	0	0	18	15	3
HGLibA_01353	AIM2	x	92	34	158	177	14	1008	65	42	153
HGLibA_01354	AIMP1	x	175	116	228	180	52	132	378	193	215
HGLibA_01355	AIMP1	x	89	48	87	6	13	11	156	59	119
HGLibA_01356	AIMP1	x	6	11	25	6	119	0	0	9	19
HGLibA_01357	AIMP2	x	76	55	97	166	1	0	51	106	22
HGLibA_01358	AIMP2	x	260	141	234	1001	35	761	440	249	151
HGLibA_01359	AIMP2	x	49	4	12	8	7	0	9	53	40
HGLibA_01360	AIP	x	64	42	72	6	27	1162	8	7	46
HGLibA_01361	AIP	x	251	98	143	1165	3111	1404	116	163	249
HGLibA_01362	AIP	x	199	109	250	1284	1254	11619	250	231	290
HGLibA_01363	AIPL1	x	95	93	110	29	4	67	49	140	128
HGLibA_01364	AIPL1	x	45	33	113	35	42	3	143	25	84
HGLibA_01365	AIPL1	x	197	86	187	51	434	112	265	92	223
HGLibA_01366	AIRE	x	57	87	148	0	99	25	130	214	139
HGLibA_01367	AIRE	x	18	12	14	0	7	12	18	18	0
HGLibA_01368	AIRE	x	94	46	100	619	27	0	165	176	72
HGLibA_01369	AJAP1	x	142	77	226	355	18	80	166	128	253
HGLibA_01370	AJAP1	x	45	100	122	255	6	1157	227	184	41
HGLibA_01371	AJAP1	x	19	14	61	0	22	0	1	4	4
HGLibA_01372	AJUBA	x	167	82	107	22	3	28	121	117	124
HGLibA_01373	AJUBA	x	35	10	35	2	3	0	32	17	26
HGLibA_01374	AJUBA	x	21	5	24	0	0	0	9	10	22
HGLibA_01375	AK1	x	205	175	276	162	201	164	322	321	233
HGLibA_01376	AK1	x	72	26	111	281	61	5	18	112	78
HGLibA_01377	AK1	x	263	141	185	381	194	185	195	311	170
HGLibA_01378	AK2	x	139	110	207	119	38	7	298	243	266
HGLibA_01379	AK2	x	126	134	116	942	28	12	291	244	194
HGLibA_01380	AK2	x	142	102	169	104	15	318	360	215	66
HGLibA_01381	AK3	x	147	54	121	413	49	1673	200	116	249
HGLibA_01382	AK3	x	42	19	31	148	15	20	63	24	0
HGLibA_01383	AK3	x	272	168	254	147	496	2205	194	367	344
HGLibA_01384	AK4	x	467	352	597	539	254	1303	858	768	528
HGLibA_01385	AK4	x	193	140	223	354	295	47	199	160	109
HGLibA_01386	AK4	x	3	10	59	0	17	0	4	0	23
HGLibA_01387	AK5	x	102	77	178	23	79	64	141	63	174
HGLibA_01388	AK5	x	64	62	62	509	19	0	234	79	79
HGLibA_01389	AK5	x	9	27	63	11	2	0	52	33	42
HGLibA_01390	AK6	x	16	17	54	0	17	0	16	10	14
HGLibA_01391	AK6	x	189	105	159	46	5	0	137	55	31
HGLibA_01392	AK6	x	46	21	36	53	0	0	70	0	7
HGLibA_01393	AK7	x	188	112	249	176	268	306	216	167	240
HGLibA_01394	AK7	x	104	59	129	185	19	180	140	160	111
HGLibA_01395	AK7	x	0	0	12	0	5	0	0	0	0
HGLibA_01396	AK8	x	186	118	160	28	44	11	225	165	194
HGLibA_01397	AK8	x	85	119	209	67	90	334	113	184	128
HGLibA_01398	AK8	x	230	63	80	39	16	51	148	129	59
HGLibA_01399	AK9	x	246	69	176	15	432	32	238	150	121
HGLibA_01400	AK9	x	92	38	120	9	273	335	195	146	136
HGLibA_01401	AK9	x	120	115	140	30	15	405	238	192	226
HGLibA_01402	AKAP1	x	336	242	386	169	200	99	348	274	223
HGLibA_01403	AKAP1	x	13	18	19	0	0	0	6	56	18
HGLibA_01404	AKAP1	x	181	116	287	143	211	0	372	143	63
HGLibA_01405	AKAP10	x	506	266	583	361	206	58	719	663	405
HGLibA_01406	AKAP10	x	150	122	274	12	1161	199	274	195	278
HGLibA_01407	AKAP10	x	165	169	180	47	201	21	365	227	126
HGLibA_01408	AKAP11	x	79	57	140	6	40	21	137	73	235
HGLibA_01409	AKAP11	x	109	65	221	27	19	33	79	86	109
HGLibA_01410	AKAP11	x	40	31	51	18	0	33	93	45	44
HGLibA_01411	AKAP12	x	87	61	121	196	124	84	183	83	94
HGLibA_01412	AKAP12	x	64	55	143	121	101	7	87	155	167
HGLibA_01413	AKAP12	x	266	242	413	1275	78	417	543	445	499
HGLibA_01414	AKAP13	x	170	163	336	18	38	461	121	205	174
HGLibA_01415	AKAP13	x	76	34	42	8	6	29	12	6	20
HGLibA_01416	AKAP13	x	88	21	115	24	167	62	175	36	33
HGLibA_01417	AKAP14	x	162	100	117	84	35	33	74	164	73
HGLibA_01418	AKAP14	x	136	142	234	67	107	140	188	91	229
HGLibA_01419	AKAP14	x	132	89	77	4	265	11	248	59	194
HGLibA_01423;HGLibA_01420	AKAP17A_Y;AKAP17A_X	x	576	454	701	413	463	1022	1023	538	734
HGLibA_01424;HGLibA_01421	AKAP17A_Y;AKAP17A_X	x	567	416	855	352	973	1364	710	647	612
HGLibA_01425;HGLibA_01422	AKAP17A_Y;AKAP17A_X	x	274	174	351	166	258	1173	516	489	315
HGLibA_01426	AKAP2	x	46	38	70	32	0	0	52	30	25
HGLibA_01427	AKAP2	x	23	46	34	1046	0	0	49	71	17
HGLibA_01428	AKAP2	x	224	111	140	250	37	14	306	53	136
HGLibA_01429	AKAP3	x	4	15	30	16	0	3	41	0	5
HGLibA_01430	AKAP3	x	54	43	118	4	11	74	51	32	84
HGLibA_01431	AKAP3	x	117	98	183	187	86	44	196	125	70
HGLibA_01432	AKAP4	x	29	27	92	20	74	12	48	18	81
HGLibA_01433	AKAP4	x	148	138	169	1510	1837	101	243	241	182
HGLibA_01434	AKAP4	x	381	274	509	542	1594	553	683	621	495
HGLibA_01435	AKAP5	x	89	61	62	10	0	0	64	54	149
HGLibA_01436	AKAP5	x	189	92	178	75	50	24	294	381	87
HGLibA_01437	AKAP5	x	235	131	204	162	913	148	278	432	283
HGLibA_01438	AKAP6	x	388	135	362	43	82	276	350	180	291
HGLibA_01439	AKAP6	x	179	126	277	407	1403	111	340	286	228
HGLibA_01440	AKAP6	x	211	165	301	172	219	56	118	248	102
HGLibA_01441	AKAP7	x	90	59	132	4	13	33	188	84	242
HGLibA_01442	AKAP7	x	26	40	79	2	46	0	34	54	142
HGLibA_01443	AKAP7	x	64	16	110	1	0	10	26	83	56
HGLibA_01444	AKAP8	x	119	47	59	894	12	3	159	136	62
HGLibA_01445	AKAP8	x	79	44	114	468	26	58	272	186	89
HGLibA_01446	AKAP8	x	58	22	82	0	0	0	37	15	14
HGLibA_01447	AKAP8L	x	95	46	94	19	0	122	293	81	120
HGLibA_01448	AKAP8L	x	282	186	444	59	120	100	288	287	193
HGLibA_01449	AKAP8L	x	64	49	98	53	23	24	51	139	64
HGLibA_01450	AKAP9	x	195	122	252	246	58	35	262	222	304
HGLibA_01451	AKAP9	x	13	21	31	10	0	12	29	12	31
HGLibA_01452	AKAP9	x	24	7	19	0	27	0	4	2	11
HGLibA_01453	AKIP1	x	136	96	172	29	0	14	134	55	85
HGLibA_01454	AKIP1	x	38	49	75	31	0	13	70	77	72
HGLibA_01455	AKIP1	x	221	120	213	45	59	63	123	139	212
HGLibA_01456	AKIRIN1	x	60	77	131	174	24	0	144	256	246
HGLibA_01457	AKIRIN1	x	359	172	282	72	165	47	387	167	410
HGLibA_01458	AKIRIN1	x	13	1	15	0	0	0	0	0	0
HGLibA_01459	AKIRIN2	x	36	7	36	148	10	95	8	106	46
HGLibA_01460	AKIRIN2	x	127	89	130	2	47	47	70	70	176
HGLibA_01461	AKIRIN2	x	38	43	82	27	58	84	40	113	188
HGLibA_01462	AKNA	x	96	96	183	79	30	7	112	49	181
HGLibA_01463	AKNA	x	93	38	150	75	58	16	19	97	42
HGLibA_01464	AKNA	x	86	36	109	241	21	9	425	187	101
HGLibA_01465	AKNAD1	x	39	25	56	4	0	0	12	47	0
HGLibA_01466	AKNAD1	x	60	56	110	213	20	146	128	47	95
HGLibA_01467	AKNAD1	x	52	50	165	92	54	110	201	141	208
HGLibA_01468	AKR1A1	x	370	137	267	138	737	75	377	227	237
HGLibA_01469	AKR1A1	x	320	166	377	141	346	264	368	407	547
HGLibA_01470	AKR1A1	x	169	89	142	13	14	20	172	279	83
HGLibA_01471	AKR1B1	x	275	263	383	406	79	61	400	330	370
HGLibA_01472	AKR1B1	x	104	42	135	93	246	67	116	146	92
HGLibA_01473	AKR1B1	x	33	12	61	179	186	102	158	115	53
HGLibA_01474	AKR1B10	x	175	80	166	60	85	188	98	94	72
HGLibA_01475	AKR1B10	x	29	9	49	4	36	19	0	22	56
HGLibA_01476	AKR1B10	x	115	95	120	152	30	82	214	181	130
HGLibA_01477	AKR1B15	x	256	144	317	140	378	233	283	237	272
HGLibA_01478	AKR1B15	x	135	109	234	64	2	50	200	152	134
HGLibA_01479	AKR1B15	x	28	36	56	22	42	34	84	91	49
HGLibA_01480	AKR1C1	x	173	134	212	25	704	60	395	195	311
HGLibA_01481	AKR1C1	x	56	38	70	4	142	14	63	22	91
HGLibA_01482	AKR1C1	x	71	73	131	166	24	14	48	185	137
HGLibA_01483	AKR1C2	x	47	56	83	1	23	0	95	68	68
HGLibA_01484	AKR1C2	x	68	57	208	46	84	17	80	131	234
HGLibA_01485	AKR1C2	x	37	27	55	5	10	49	52	105	97
HGLibA_01486	AKR1C3	x	114	80	158	25	20	95	133	82	14
HGLibA_01487	AKR1C3	x	53	91	86	44	92	36	148	112	91
HGLibA_01488	AKR1C3	x	179	160	224	72	353	97	277	274	236
HGLibA_01489	AKR1C4	x	16	17	40	202	526	0	43	122	30
HGLibA_01490	AKR1C4	x	23	36	106	5	0	36	13	50	98
HGLibA_01491	AKR1C4	x	201	124	278	65	81	42	120	242	152
HGLibA_01492	AKR1D1	x	176	150	318	63	184	267	163	157	282
HGLibA_01493	AKR1D1	x	63	82	91	21	26	16	84	59	143
HGLibA_01494	AKR1D1	x	104	69	62	2	19	15	68	33	38
HGLibA_01495	AKR1E2	x	252	173	234	25	91	30	208	165	128
HGLibA_01496	AKR1E2	x	173	90	165	1376	204	17	255	172	154
HGLibA_01497	AKR1E2	x	124	81	143	82	18	56	256	92	202
HGLibA_01498	AKR7A2	x	245	143	333	323	24	861	159	314	294
HGLibA_01499	AKR7A2	x	30	48	38	0	57	24	189	42	99
HGLibA_01500	AKR7A2	x	376	253	394	303	203	210	374	442	297
HGLibA_01501	AKR7A3	x	173	80	179	128	23	112	147	102	186
HGLibA_01502	AKR7A3	x	41	52	70	0	0	0	53	123	38
HGLibA_01503	AKR7A3	x	76	37	58	65	67	38	92	47	24
HGLibA_01504	AKT1	x	127	95	180	10	4	0	53	131	163
HGLibA_01505	AKT1	x	374	251	326	50	20	89	138	130	98
HGLibA_01506	AKT1	x	105	149	127	23	232	0	32	97	43
HGLibA_01507	AKT1S1	x	55	40	144	13	123	5	107	133	189
HGLibA_01508	AKT1S1	x	151	81	138	1784	42	224	366	218	329
HGLibA_01509	AKT1S1	x	63	98	133	72	0	0	52	100	79
HGLibA_01510	AKT2	x	84	92	146	6	20	185	41	30	40
HGLibA_01511	AKT2	x	261	155	247	94	295	58	125	148	86
HGLibA_01512	AKT2	x	131	86	249	20	56	5	184	189	122
HGLibA_01513	AKT3	x	130	59	146	85	16	13	91	111	198
HGLibA_01514	AKT3	x	66	85	183	69	253	106	111	234	128
HGLibA_01515	AKT3	x	10	5	12	0	10	0	18	23	16
HGLibA_01516	AKTIP	x	184	138	157	206	238	35	121	221	123
HGLibA_01517	AKTIP	x	83	55	128	11	7	59	145	43	53
HGLibA_01518	AKTIP	x	49	58	82	18	27	0	11	141	39
HGLibA_01519	ALAD	x	87	67	197	217	33	15	69	84	53
HGLibA_01520	ALAD	x	177	110	259	218	128	402	72	118	144
HGLibA_01521	ALAD	x	175	132	166	136	519	96	211	202	234
HGLibA_01522	ALAS1	x	66	47	69	0	0	11	14	116	0
HGLibA_01523	ALAS1	x	182	123	225	74	17	19	100	112	161
HGLibA_01524	ALAS1	x	240	83	138	10	9	20	133	37	49
HGLibA_01525	ALAS2	x	98	44	90	5	1113	292	138	102	71
HGLibA_01526	ALAS2	x	227	182	338	278	46	110	438	514	347
HGLibA_01527	ALAS2	x	123	77	102	63	3	36	147	60	227
HGLibA_01528	ALB	x	230	77	247	130	810	52	329	343	298
HGLibA_01529	ALB	x	40	7	33	19	19	0	34	37	22
HGLibA_01530	ALB	x	108	53	98	34	11	351	78	183	204
HGLibA_01531	ALCAM	x	173	127	322	76	13	104	430	269	183
HGLibA_01532	ALCAM	x	150	107	244	245	47	93	399	280	271
HGLibA_01533	ALCAM	x	52	51	92	186	214	32	113	92	106
HGLibA_01534	ALDH16A1	x	13	7	47	0	0	14	11	0	15
HGLibA_01535	ALDH16A1	x	88	78	141	33	136	25	159	105	134
HGLibA_01536	ALDH16A1	x	59	48	90	15	21	41	85	139	110
HGLibA_01537	ALDH18A1	x	184	57	173	371	29	30	129	121	354
HGLibA_01538	ALDH18A1	x	166	119	203	46	24	43	160	218	196
HGLibA_01539	ALDH18A1	x	41	42	170	30	628	219	105	109	159
HGLibA_01540	ALDH1A1	x	140	63	173	350	0	140	205	147	186
HGLibA_01541	ALDH1A1	x	105	57	168	70	130	61	202	107	84
HGLibA_01542	ALDH1A1	x	93	71	131	126	117	7	176	182	161
HGLibA_01543	ALDH1A2	x	26	15	66	5	10	20	19	23	62
HGLibA_01544	ALDH1A2	x	61	65	110	345	101	26	84	108	111
HGLibA_01545	ALDH1A2	x	172	110	247	117	963	20	287	317	89
HGLibA_01546	ALDH1A3	x	26	33	41	0	20	0	29	14	0
HGLibA_01547	ALDH1A3	x	234	98	248	89	356	83	224	237	198
HGLibA_01548	ALDH1A3	x	59	70	142	18	52	21	169	211	224
HGLibA_01549	ALDH1B1	x	69	18	100	14	2	0	60	81	21
HGLibA_01550	ALDH1B1	x	124	68	135	637	145	92	169	186	178
HGLibA_01551	ALDH1B1	x	201	152	179	243	71	49	211	279	147
HGLibA_01552	ALDH1L1	x	102	33	114	20	25	30	100	72	160
HGLibA_01553	ALDH1L1	x	78	35	82	42	10	27	125	148	70
HGLibA_01554	ALDH1L1	x	175	117	280	249	88	76	262	398	181
HGLibA_01555	ALDH1L2	x	109	41	139	19	87	56	61	101	122
HGLibA_01556	ALDH1L2	x	209	157	377	81	51	26	485	214	231
HGLibA_01557	ALDH1L2	x	62	52	41	18	20	0	80	35	13
HGLibA_01558	ALDH2	x	40	62	104	0	171	0	75	62	71
HGLibA_01559	ALDH2	x	5	14	3	0	27	0	25	7	0
HGLibA_01560	ALDH2	x	88	89	162	352	0	266	137	179	227
HGLibA_01561	ALDH3A1	x	150	92	211	108	97	114	288	321	226
HGLibA_01562	ALDH3A1	x	120	86	219	12	46	47	58	147	224
HGLibA_01563	ALDH3A1	x	64	74	110	60	166	20	158	96	67
HGLibA_01564	ALDH3A2	x	244	222	289	348	59	45	392	191	224
HGLibA_01565	ALDH3A2	x	110	113	148	21	304	546	104	96	96
HGLibA_01566	ALDH3A2	x	100	150	191	11	92	77	281	399	229
HGLibA_01567	ALDH3B1	x	106	116	171	36	670	88	203	225	269
HGLibA_01568	ALDH3B1	x	0	0	8	0	0	0	7	3	3
HGLibA_01569	ALDH3B1	x	109	113	297	27	133	172	278	195	111
HGLibA_01570	ALDH3B2	x	131	91	109	484	12	44	104	157	110
HGLibA_01571	ALDH3B2	x	153	117	201	304	1216	66	117	68	57
HGLibA_01572	ALDH3B2	x	232	101	227	23	128	23	207	156	160
HGLibA_01573	ALDH4A1	x	239	102	157	60	131	81	176	257	194
HGLibA_01574	ALDH4A1	x	97	46	104	23	8	32	68	225	55
HGLibA_01575	ALDH4A1	x	60	46	52	597	0	128	147	210	25
HGLibA_01576	ALDH5A1	x	10	25	85	340	18	178	105	71	73
HGLibA_01577	ALDH5A1	x	37	13	48	12	4	68	36	53	41
HGLibA_01578	ALDH5A1	x	125	88	198	47	75	9	178	111	86
HGLibA_01579	ALDH6A1	x	26	77	60	22	0	22	107	31	45
HGLibA_01580	ALDH6A1	x	15	18	81	215	149	19	66	21	71
HGLibA_01581	ALDH6A1	x	67	56	83	3	0	25	79	75	31
HGLibA_01582	ALDH7A1	x	142	135	160	78	51	36	162	178	191
HGLibA_01583	ALDH7A1	x	75	18	13	29	401	45	21	68	35
HGLibA_01584	ALDH7A1	x	193	119	153	164	192	4	321	147	135
HGLibA_01585	ALDH8A1	x	80	117	263	334	9040	411	172	218	152
HGLibA_01586	ALDH8A1	x	170	181	433	27	166	112	163	168	257
HGLibA_01587	ALDH8A1	x	85	49	67	8	15	19	66	150	57
HGLibA_01588	ALDH9A1	x	114	33	74	359	64	32	82	46	47
HGLibA_01589	ALDH9A1	x	0	20	38	6	0	13	82	18	79
HGLibA_01590	ALDH9A1	x	185	85	220	24	38	35	189	192	240
HGLibA_01591	ALDOA	x	65	54	76	0	28	49	97	60	16
HGLibA_01592	ALDOA	x	235	157	298	114	47	18	113	57	117
HGLibA_01593	ALDOA	x	235	150	283	52	42	106	124	91	26
HGLibA_01594	ALDOB	x	228	157	308	44	116	123	209	203	235
HGLibA_01595	ALDOB	x	264	164	371	602	205	58	482	240	284
HGLibA_01596	ALDOB	x	92	44	74	61	13	5	164	45	86
HGLibA_01597	ALDOC	x	94	41	101	9	5	0	64	103	50
HGLibA_01598	ALDOC	x	257	196	232	210	138	59	272	203	177
HGLibA_01599	ALDOC	x	145	91	127	34	32	77	149	17	145
HGLibA_01600	ALG1	x	232	80	193	263	27	185	225	60	236
HGLibA_01601	ALG1	x	56	66	95	22	42	19	178	65	81
HGLibA_01602	ALG1	x	91	73	104	29	43	20	184	238	41
HGLibA_01603	ALG10	x	160	80	175	35	153	42	266	184	114
HGLibA_01604	ALG10	x	72	32	101	0	12	8	82	73	134
HGLibA_01605	ALG10	x	41	18	46	0	0	0	42	65	5
HGLibA_01606	ALG10B	x	76	27	88	7	9	36	49	21	8
HGLibA_01607	ALG10B	x	222	88	133	39	18	22	138	47	94
HGLibA_01608	ALG10B	x	77	68	192	15	17	20	262	133	62
HGLibA_01609	ALG11	x	27	24	2	0	0	0	0	5	6
HGLibA_01610	ALG11	x	54	28	81	0	0	0	13	0	25
HGLibA_01611	ALG11	x	90	30	112	15	0	0	9	0	40
HGLibA_01612	ALG12	x	287	193	329	194	111	115	280	219	406
HGLibA_01613	ALG12	x	126	98	141	337	22	31	372	343	113
HGLibA_01614	ALG12	x	125	119	90	0	12	17	123	159	152
HGLibA_01615	ALG13	x	185	116	238	27	36	199	83	197	198
HGLibA_01616	ALG13	x	135	43	174	0	0	0	39	41	27
HGLibA_01617	ALG13	x	78	93	136	176	7	1563	66	93	90
HGLibA_01618	ALG14	x	96	142	183	53	175	84	54	50	101
HGLibA_01619	ALG14	x	29	18	23	31	3	0	2	57	6
HGLibA_01620	ALG14	x	147	73	156	20	13	19	74	59	135
HGLibA_01621	ALG1L	x	85	22	37	14	88	5	72	79	150
HGLibA_01622	ALG1L	x	111	59	180	61	25	272	199	81	115
HGLibA_01623	ALG1L	x	40	28	118	137	3	44	118	53	64
HGLibA_01624	ALG2	x	436	197	301	54	9	11	97	46	114
HGLibA_01625	ALG2	x	152	66	148	0	1	0	10	19	53
HGLibA_01626	ALG2	x	149	79	160	446	37	28	208	222	84
HGLibA_01627	ALG3	x	75	63	118	10	16	16	53	35	75
HGLibA_01628	ALG3	x	89	62	86	39	0	34	190	108	124
HGLibA_01629	ALG3	x	106	71	106	190	174	804	239	137	174
HGLibA_01630	ALG5	x	147	104	168	387	152	33	135	112	136
HGLibA_01631	ALG5	x	114	94	116	18	0	49	113	119	30
HGLibA_01632	ALG5	x	41	40	47	36	26	0	72	105	45
HGLibA_01633	ALG6	x	153	114	207	105	420	149	250	258	148
HGLibA_01634	ALG6	x	115	46	113	30	11	8	179	158	151
HGLibA_01635	ALG6	x	186	147	250	96	107	182	266	195	123
HGLibA_01636	ALG8	x	89	36	58	231	25	0	124	54	42
HGLibA_01637	ALG8	x	61	30	57	16	73	0	44	10	23
HGLibA_01638	ALG8	x	236	173	355	493	31	191	349	339	209
HGLibA_01639	ALG9	x	212	104	195	16	22	114	164	86	107
HGLibA_01640	ALG9	x	168	87	254	27	105	45	130	148	280
HGLibA_01641	ALG9	x	8	13	14	0	0	0	48	28	7
HGLibA_01642	ALK	x	199	199	382	723	400	149	439	322	399
HGLibA_01643	ALK	x	23	17	79	0	4	0	102	75	31
HGLibA_01644	ALK	x	102	92	204	62	44	731	145	160	183
HGLibA_01645	ALKBH1	x	265	235	374	342	1769	77	537	130	438
HGLibA_01646	ALKBH1	x	167	77	227	858	95	13	178	113	116
HGLibA_01647	ALKBH1	x	283	144	303	93	85	0	110	130	295
HGLibA_01648	ALKBH2	x	219	76	145	3	77	43	166	237	85
HGLibA_01649	ALKBH2	x	173	127	292	72	66	527	373	201	165
HGLibA_01650	ALKBH2	x	70	64	63	15	14	11	79	45	88
HGLibA_01651	ALKBH3	x	169	70	157	238	110	96	78	267	162
HGLibA_01652	ALKBH3	x	262	158	307	71	107	97	245	203	185
HGLibA_01653	ALKBH3	x	154	85	257	19	17	141	128	122	372
HGLibA_01654	ALKBH4	x	266	101	182	9	74	69	127	281	183
HGLibA_01655	ALKBH4	x	134	126	155	34	235	356	183	126	183
HGLibA_01656	ALKBH4	x	53	52	112	18	1482	16	51	120	27
HGLibA_01657	ALKBH5	x	172	138	256	353	816	115	117	137	70
HGLibA_01658	ALKBH5	x	91	86	85	6	6	163	13	45	68
HGLibA_01659	ALKBH5	x	91	31	73	13	31	18	85	47	51
HGLibA_01660	ALKBH6	x	161	134	269	59	90	128	217	133	241
HGLibA_01661	ALKBH6	x	120	89	191	36	217	641	174	169	361
HGLibA_01662	ALKBH6	x	30	45	71	6	23	0	46	48	14
HGLibA_01663	ALKBH7	x	80	80	131	137	20	172	149	87	30
HGLibA_01664	ALKBH7	x	110	78	196	24	70	23	52	44	76
HGLibA_01665	ALKBH7	x	149	100	104	84	42	32	46	78	75
HGLibA_01666	ALKBH8	x	134	103	117	3	295	488	52	71	121
HGLibA_01667	ALKBH8	x	220	116	329	512	167	28	188	114	301
HGLibA_01668	ALKBH8	x	70	65	81	7	56	40	66	158	103
HGLibA_01669	ALLC	x	87	85	117	163	0	8	108	64	39
HGLibA_01670	ALLC	x	40	41	86	54	0	732	41	29	32
HGLibA_01671	ALLC	x	62	9	61	8	14	0	40	34	45
HGLibA_01672	ALMS1	x	129	85	164	75	36	227	194	389	277
HGLibA_01673	ALMS1	x	216	155	298	368	212	179	399	382	230
HGLibA_01674	ALMS1	x	36	31	71	0	87	0	40	41	40
HGLibA_01675	ALOX12	x	102	95	195	26	163	47	203	35	242
HGLibA_01676	ALOX12	x	225	176	293	109	128	55	110	467	214
HGLibA_01677	ALOX12	x	234	91	141	71	19	50	251	142	198
HGLibA_01678	ALOX12B	x	46	51	140	66	17	0	14	129	73
HGLibA_01679	ALOX12B	x	40	42	126	17	27	0	16	10	29
HGLibA_01680	ALOX12B	x	280	151	252	48	312	568	393	393	467
HGLibA_01681	ALOX15	x	29	20	6	6	60	6	58	48	39
HGLibA_01682	ALOX15	x	98	92	176	107	83	22	317	142	145
HGLibA_01683	ALOX15	x	167	91	178	378	23	32	221	98	180
HGLibA_01684	ALOX15B	x	95	62	143	62	20	19	162	57	111
HGLibA_01685	ALOX15B	x	81	59	85	8	25	135	129	46	62
HGLibA_01686	ALOX15B	x	167	119	306	142	20	34	238	163	275
HGLibA_01687	ALOX5	x	169	82	216	104	27	39	282	140	60
HGLibA_01688	ALOX5	x	51	17	16	29	0	0	55	19	0
HGLibA_01689	ALOX5	x	109	34	67	115	58	65	194	185	70
HGLibA_01690	ALOX5AP	x	113	46	111	40	63	4	80	85	112
HGLibA_01691	ALOX5AP	x	73	52	161	123	15	18	73	37	224
HGLibA_01692	ALOX5AP	x	121	85	270	388	38	153	99	172	88
HGLibA_01693	ALOXE3	x	20	41	82	16	5	0	21	16	14
HGLibA_01694	ALOXE3	x	66	42	135	90	13	274	101	58	78
HGLibA_01695	ALOXE3	x	121	75	127	73	98	2	276	223	104
HGLibA_01696	ALPI	x	229	231	455	180	120	183	212	549	221
HGLibA_01697	ALPI	x	63	56	124	93	156	30	75	108	138
HGLibA_01698	ALPI	x	351	211	436	367	300	303	608	328	435
HGLibA_01699	ALPK1	x	187	106	205	30	465	63	320	109	225
HGLibA_01700	ALPK1	x	121	77	121	18	116	13	123	174	68
HGLibA_01701	ALPK1	x	107	121	167	43	166	44	88	195	84
HGLibA_01702	ALPK2	x	64	53	112	4	22	41	32	88	36
HGLibA_01703	ALPK2	x	80	55	136	6	10	19	70	88	65
HGLibA_01704	ALPK2	x	67	78	158	81	12	307	153	79	48
HGLibA_01705	ALPK3	x	28	32	67	161	0	10	69	13	26
HGLibA_01706	ALPK3	x	121	96	267	13	92	81	266	286	111
HGLibA_01707	ALPK3	x	10	14	24	0	18	28	20	24	55
HGLibA_01708	ALPL	x	199	49	99	77	109	8	130	115	282
HGLibA_01709	ALPL	x	90	42	47	42	139	0	75	69	24
HGLibA_01710	ALPL	x	52	59	113	31	10	17	36	117	129
HGLibA_01711	ALPP	x	529	297	478	553	500	86	505	362	358
HGLibA_01712	ALPP	x	179	118	253	87	34	93	379	179	171
HGLibA_01713	ALPP	x	57	43	170	1244	43	34	319	117	199
HGLibA_01714	ALPPL2	x	120	67	201	313	43	0	186	154	170
HGLibA_01715	ALPPL2	x	73	29	55	10	45	158	79	112	57
HGLibA_01716	ALPPL2	x	160	121	388	87	899	71	233	220	109
HGLibA_01717	ALS2	x	134	102	174	21	348	20	172	234	94
HGLibA_01718	ALS2	x	89	62	158	134	43	8	60	68	80
HGLibA_01719	ALS2	x	36	9	43	0	0	0	42	6	38
HGLibA_01720	ALS2CL	x	182	152	306	82	61	336	298	155	158
HGLibA_01721	ALS2CL	x	133	88	132	265	113	92	123	254	233
HGLibA_01722	ALS2CL	x	331	237	290	1514	141	74	675	275	446
HGLibA_01723	ALS2CR11	x	57	27	88	0	26	0	132	84	33
HGLibA_01724	ALS2CR11	x	39	31	70	14	35	160	71	32	69
HGLibA_01725	ALS2CR11	x	107	158	328	5043	74	72	129	257	286
HGLibA_01726	ALS2CR12	x	57	36	72	4	8	0	37	8	39
HGLibA_01727	ALS2CR12	x	145	60	137	154	8	81	209	70	89
HGLibA_01728	ALS2CR12	x	339	122	288	314	74	71	200	300	209
HGLibA_01729	ALS2CR8	x	186	166	321	107	392	54	295	344	251
HGLibA_01730	ALS2CR8	x	124	81	149	150	12	50	43	66	108
HGLibA_01731	ALS2CR8	x	110	43	99	21	73	25	99	97	158
HGLibA_01732	ALX1	x	45	47	79	48	0	139	197	29	56
HGLibA_01733	ALX1	x	168	124	282	62	51	28	252	358	130
HGLibA_01734	ALX1	x	85	67	117	37	341	37	183	84	52
HGLibA_01735	ALX3	x	50	40	61	12	14	118	78	107	122
HGLibA_01736	ALX3	x	52	52	160	11	21	59	71	230	117
HGLibA_01737	ALX3	x	87	115	128	310	7	39	124	200	93
HGLibA_01738	ALX4	x	185	86	320	123	621	147	264	175	134
HGLibA_01739	ALX4	x	39	22	81	0	3	7	64	100	47
HGLibA_01740	ALX4	x	97	56	120	26	44	255	100	59	37
HGLibA_01741	ALYREF	x	57	26	56	40	0	9	17	50	104
HGLibA_01742	ALYREF	x	62	55	112	35	524	56	181	81	102
HGLibA_01743	ALYREF	x	95	96	161	144	51	311	112	236	226
HGLibA_01744	AMACR	x	70	47	65	36	76	9	90	87	48
HGLibA_01745	AMACR	x	50	49	86	0	119	0	78	17	83
HGLibA_01746	AMACR	x	141	93	162	40	107	0	240	174	111
HGLibA_01747	AMBN	x	121	131	215	10	25	39	169	160	243
HGLibA_01748	AMBN	x	47	44	83	23	0	7	43	67	38
HGLibA_01749	AMBN	x	222	158	242	395	18	147	306	193	173
HGLibA_01750	AMBP	x	190	113	202	98	153	22	350	218	161
HGLibA_01751	AMBP	x	167	60	189	277	1556	40	313	149	192
HGLibA_01752	AMBP	x	120	40	58	10	0	149	71	85	52
HGLibA_01753	AMBRA1	x	112	71	93	30	487	0	121	179	95
HGLibA_01754	AMBRA1	x	112	110	157	15	17	8	50	55	90
HGLibA_01755	AMBRA1	x	56	43	105	8	48	0	75	199	60
HGLibA_01756	AMD1	x	133	93	186	192	0	25	179	136	138
HGLibA_01757	AMD1	x	128	41	98	49	9	27	133	185	112
HGLibA_01758	AMD1	x	77	55	75	2	0	0	12	57	9
HGLibA_01759	AMDHD1	x	122	85	100	15	78	57	308	339	111
HGLibA_01760	AMDHD1	x	300	148	252	95	190	860	228	438	174
HGLibA_01761	AMDHD1	x	83	17	63	32	29	7	162	79	24
HGLibA_01762	AMDHD2	x	176	143	267	76	713	229	398	252	462
HGLibA_01763	AMDHD2	x	114	38	67	2830	18	0	56	123	32
HGLibA_01764	AMDHD2	x	107	64	140	59	28	0	152	124	34
HGLibA_01765	AMELX	x	140	66	156	21	177	71	94	183	210
HGLibA_01766	AMELX	x	343	248	339	468	471	417	302	512	371
HGLibA_01767	AMELX	x	26	10	31	0	4	16	37	16	14
HGLibA_01768	AMELY	x	7	4	5	1	0	0	15	0	0
HGLibA_01769	AMELY	x	185	85	236	131	23	15	224	271	145
HGLibA_01770	AMELY	x	191	137	313	95	61	139	572	249	392
HGLibA_01771	AMER1	x	222	165	349	33	53	34	222	439	197
HGLibA_01772	AMER1	x	130	64	118	68	49	17	248	79	88
HGLibA_01773	AMER1	x	156	134	313	269	359	102	199	390	297
HGLibA_01774	AMER2	x	115	77	130	244	37	50	234	128	99
HGLibA_01775	AMER2	x	186	122	277	446	39	1614	188	123	488
HGLibA_01776	AMER2	x	89	122	221	26	6	23	276	270	142
HGLibA_01777	AMER3	x	5	34	67	8	0	0	18	100	65
HGLibA_01778	AMER3	x	154	146	259	158	646	31	130	565	202
HGLibA_01779	AMER3	x	16	7	13	0	0	0	0	10	10
HGLibA_01780	AMFR	x	67	35	53	5	3	14	55	88	42
HGLibA_01781	AMFR	x	44	18	32	11	76	10	9	60	21
HGLibA_01782	AMFR	x	42	24	32	8	114	28	56	129	11
HGLibA_01783	AMH	x	91	63	82	14	7	2157	125	82	71
HGLibA_01784	AMH	x	110	47	105	24	0	30	90	116	110
HGLibA_01785	AMH	x	110	65	86	10	69	323	68	240	120
HGLibA_01786	AMHR2	x	62	25	45	8	110	7	82	33	27
HGLibA_01787	AMHR2	x	388	350	439	154	811	82	713	318	389
HGLibA_01788	AMHR2	x	130	140	195	61	109	209	326	175	140
HGLibA_01789	AMICA1	x	314	243	449	674	193	79	350	365	531
HGLibA_01790	AMICA1	x	3	17	35	6	0	0	52	19	0
HGLibA_01791	AMICA1	x	96	38	179	91	244	243	263	204	101
HGLibA_01792	AMIGO1	x	146	75	165	221	304	27	210	207	196
HGLibA_01793	AMIGO1	x	66	68	66	81	2	11	92	78	111
HGLibA_01794	AMIGO1	x	107	42	87	22	14	18	20	63	6
HGLibA_01795	AMIGO2	x	162	172	280	79	357	387	379	462	362
HGLibA_01796	AMIGO2	x	316	91	285	28	21	337	219	169	136
HGLibA_01797	AMIGO2	x	108	45	108	2	4	0	115	78	66
HGLibA_01798	AMIGO3	x	119	141	124	691	447	24	135	330	150
HGLibA_01799	AMIGO3	x	113	64	154	547	28	283	161	145	247
HGLibA_01800	AMIGO3	x	80	88	59	918	16	20	194	71	87
HGLibA_01801	AMMECR1	x	146	92	206	21	17	25	253	177	160
HGLibA_01802	AMMECR1	x	15	11	28	4	35	0	7	92	39
HGLibA_01803	AMMECR1	x	181	115	274	69	25	280	235	338	250
HGLibA_01804	AMMECR1L	x	95	75	202	67	96	38	268	245	178
HGLibA_01805	AMMECR1L	x	75	76	102	44	18	18	98	108	125
HGLibA_01806	AMMECR1L	x	17	4	8	0	0	9	50	31	2
HGLibA_01807	AMN	x	119	39	101	37	34	13	42	86	92
HGLibA_01808	AMN	x	160	85	184	1375	553	0	123	174	263
HGLibA_01809	AMN	x	67	20	102	45	60	5	56	53	120
HGLibA_01810	AMN1	x	140	53	187	30	0	17	190	41	79
HGLibA_01811	AMN1	x	143	51	98	26	77	21	144	105	116
HGLibA_01812	AMN1	x	63	49	137	14	2	294	104	70	21
HGLibA_01813	AMOT	x	44	41	76	15	16	86	72	44	91
HGLibA_01814	AMOT	x	167	96	158	0	31	59	143	316	129
HGLibA_01815	AMOT	x	30	20	101	47	15	7	90	76	59
HGLibA_01816	AMOTL1	x	82	44	82	23	70	3	108	143	96
HGLibA_01817	AMOTL1	x	189	81	115	838	0	8	103	113	65
HGLibA_01818	AMOTL1	x	280	242	423	404	241	47	425	322	308
HGLibA_01819	AMOTL2	x	162	125	268	747	49	211	274	270	183
HGLibA_01820	AMOTL2	x	6	23	7	6	86	0	10	3	0
HGLibA_01821	AMOTL2	x	0	6	7	0	22	0	0	12	44
HGLibA_01822	AMPD1	x	134	53	143	19	179	110	178	151	111
HGLibA_01823	AMPD1	x	32	47	97	88	9	28	166	60	32
HGLibA_01824	AMPD1	x	74	91	179	115	7	31	83	74	90
HGLibA_01825	AMPD2	x	91	68	74	65	7	94	192	103	105
HGLibA_01826	AMPD2	x	113	35	121	265	45	436	146	101	89
HGLibA_01827	AMPD2	x	133	73	99	66	64	285	230	266	114
HGLibA_01828	AMPD3	x	139	35	128	79	44	3	87	74	131
HGLibA_01829	AMPD3	x	12	6	24	0	0	0	6	10	7
HGLibA_01830	AMPD3	x	169	93	112	45	16	7	152	152	76
HGLibA_01831	AMPH	x	35	38	134	0	36	25	67	32	61
HGLibA_01832	AMPH	x	117	93	171	2	94	49	107	145	204
HGLibA_01833	AMPH	x	71	57	69	0	53	0	45	105	44
HGLibA_01834	AMT	x	136	77	105	44	34	99	154	159	66
HGLibA_01835	AMT	x	72	35	89	0	36	15	54	103	52
HGLibA_01836	AMT	x	79	57	84	43	25	28	67	54	26
HGLibA_01837	AMTN	x	145	69	108	31	0	30	27	85	49
HGLibA_01838	AMTN	x	89	79	137	6	75	29	87	89	143
HGLibA_01839	AMTN	x	71	59	210	143	28	27	353	75	110
HGLibA_01842	AMY1A	x	21	45	104	7	56	24	17	116	37
HGLibA_01843;HGLibA_01841	AMY1B;AMY1A	x	301	192	410	139	113	143	220	115	106
HGLibA_01845	AMY1B	x	13	6	26	8	0	0	29	16	4
HGLibA_01846	AMY1C	x	56	64	101	4	12	0	96	47	19
HGLibA_01847	AMY1C	x	147	62	97	48	112	23	175	158	234
HGLibA_01849	AMY2A	x	40	60	89	17	13	75	132	97	147
HGLibA_01850;HGLibA_01848;HGLibA_01844;HGLibA_01840	AMY2A;AMY1C;AMY1B;AMY1A	x	117	91	95	82	0	29	66	18	126
HGLibA_01851	AMY2A	x	179	132	182	75	54	213	342	174	108
HGLibA_01852	AMY2B	x	50	15	27	26	25	545	70	25	78
HGLibA_01853	AMY2B	x	139	71	97	20	47	19	126	119	159
HGLibA_01854	AMY2B	x	127	86	99	25	20	748	101	146	95
HGLibA_01855	AMZ1	x	231	154	297	34	262	201	51	173	167
HGLibA_01856	AMZ1	x	112	142	176	203	97	156	268	286	173
HGLibA_01857	AMZ1	x	168	69	211	198	49	58	129	126	179
HGLibA_01858	AMZ2	x	35	10	9	909	0	0	22	7	39
HGLibA_01859	AMZ2	x	135	89	164	155	98	362	269	113	177
HGLibA_01860	AMZ2	x	94	75	121	86	0	9	112	168	309
HGLibA_01861	ANAPC1	x	55	44	107	87	50	8	129	126	61
HGLibA_01862	ANAPC1	x	73	78	107	32	11	0	124	86	83
HGLibA_01863	ANAPC1	x	65	32	47	11	18	0	176	58	50
HGLibA_01864	ANAPC10	x	101	85	166	132	8	0	90	41	50
HGLibA_01865	ANAPC10	x	64	24	24	45	0	0	182	115	55
HGLibA_01866	ANAPC10	x	126	49	150	51	53	110	133	98	90
HGLibA_01867	ANAPC11	x	108	96	181	38	22	6	94	48	37
HGLibA_01868	ANAPC11	x	13	16	19	0	0	0	11	0	6
HGLibA_01869	ANAPC11	x	248	170	278	578	481	371	426	218	168
HGLibA_01870	ANAPC13	x	180	177	313	242	527	38	333	300	371
HGLibA_01871	ANAPC13	x	67	57	93	63	24	53	161	88	66
HGLibA_01872	ANAPC13	x	199	116	201	65	396	25	264	128	253
HGLibA_01873	ANAPC15	x	206	161	263	214	383	357	476	227	429
HGLibA_01874	ANAPC15	x	207	170	292	86	16	254	146	117	180
HGLibA_01875	ANAPC15	x	45	28	80	58	22	109	45	13	54
HGLibA_01876	ANAPC16	x	91	37	63	16	36	48	92	5	124
HGLibA_01877	ANAPC16	x	28	8	44	0	10	0	27	3	45
HGLibA_01878	ANAPC16	x	49	31	34	0	12	0	2	6	21
HGLibA_01879	ANAPC2	x	118	142	193	77	143	639	189	352	119
HGLibA_01880	ANAPC2	x	35	15	24	7	0	0	101	5	19
HGLibA_01881	ANAPC2	x	148	105	125	8	40	134	108	343	110
HGLibA_01882	ANAPC4	x	117	52	74	8	9	101	39	108	14
HGLibA_01883	ANAPC4	x	19	17	46	0	0	14	23	21	5
HGLibA_01884	ANAPC4	x	119	49	75	96	0	38	33	100	59
HGLibA_01885	ANAPC5	x	12	1	13	0	0	0	0	0	0
HGLibA_01886	ANAPC5	x	152	164	286	311	51	1623	204	165	167
HGLibA_01887	ANAPC5	x	144	148	196	14	0	0	11	3	5
HGLibA_01888	ANAPC7	x	112	82	132	67	303	40	300	281	178
HGLibA_01889	ANAPC7	x	149	65	155	32	57	14	66	221	150
HGLibA_01890	ANAPC7	x	81	120	92	44	87	5	209	149	117
HGLibA_01891	ANG	x	67	43	112	378	21	0	267	159	105
HGLibA_01892	ANG	x	56	92	99	26	6	16	13	47	53
HGLibA_01893	ANG	x	65	35	56	1	8	52	3	30	42
HGLibA_01894	ANGEL1	x	117	64	197	969	458	14	201	108	96
HGLibA_01895	ANGEL1	x	75	47	57	0	8	13	28	22	48
HGLibA_01896	ANGEL1	x	164	95	185	9	47	54	154	171	166
HGLibA_01897	ANGEL2	x	23	17	59	0	46	6	78	13	0
HGLibA_01898	ANGEL2	x	83	43	58	0	30	0	45	93	20
HGLibA_01899	ANGEL2	x	47	45	83	381	1	218	38	56	275
HGLibA_01900	ANGPT1	x	1	13	22	0	0	0	6	24	7
HGLibA_01901	ANGPT1	x	95	105	194	22	130	9	152	168	194
HGLibA_01902	ANGPT1	x	103	54	134	69	33	409	254	109	79
HGLibA_01903	ANGPT2	x	63	50	134	272	36	741	40	65	55
HGLibA_01904	ANGPT2	x	70	34	29	28	24	0	21	42	85
HGLibA_01905	ANGPT2	x	167	73	138	111	13	31	109	123	95
HGLibA_01906	ANGPT4	x	64	62	93	292	95	0	54	38	28
HGLibA_01907	ANGPT4	x	28	55	81	31	0	68	90	25	62
HGLibA_01908	ANGPT4	x	42	54	74	13	17	0	45	25	80
HGLibA_01909	ANGPTL1	x	207	119	226	106	165	13	413	498	181
HGLibA_01910	ANGPTL1	x	52	18	51	0	39	20	22	40	32
HGLibA_01911	ANGPTL1	x	64	5	87	8	52	0	78	162	30
HGLibA_01912	ANGPTL2	x	135	76	81	29	220	104	80	291	132
HGLibA_01913	ANGPTL2	x	355	181	485	255	154	803	393	366	456
HGLibA_01914	ANGPTL2	x	86	18	61	52	21	0	94	71	96
HGLibA_01915	ANGPTL3	x	6	30	19	0	0	28	49	8	6
HGLibA_01916	ANGPTL3	x	131	109	210	103	279	38	168	118	291
HGLibA_01917	ANGPTL3	x	68	10	25	11	8	12	185	55	51
HGLibA_01918	ANGPTL4	x	104	90	69	315	70	21	110	122	186
HGLibA_01919	ANGPTL4	x	186	119	178	42	142	232	116	111	101
HGLibA_01920	ANGPTL4	x	136	89	100	82	24	40	105	173	79
HGLibA_01921	ANGPTL5	x	135	115	229	58	143	0	196	243	127
HGLibA_01922	ANGPTL5	x	25	4	31	99	9	0	70	13	64
HGLibA_01923	ANGPTL5	x	11	49	26	0	2	31	74	53	38
HGLibA_01924	ANGPTL6	x	221	163	285	113	77	113	160	290	257
HGLibA_01925	ANGPTL6	x	235	119	262	53	5	112	223	289	219
HGLibA_01926	ANGPTL6	x	39	40	76	5	53	0	84	84	37
HGLibA_01927	ANGPTL7	x	53	32	36	60	25	82	174	91	143
HGLibA_01928	ANGPTL7	x	205	127	390	230	36	1094	343	278	136
HGLibA_01929	ANGPTL7	x	110	81	134	8	274	6	146	95	111
HGLibA_01930	ANHX	x	320	186	368	43	43	207	363	276	193
HGLibA_01931	ANHX	x	76	70	122	84	66	17	146	100	80
HGLibA_01932	ANHX	x	47	55	117	134	12	0	113	96	188
HGLibA_01933	ANK1	x	94	60	88	57	0	62	185	52	30
HGLibA_01934	ANK1	x	31	13	63	64	0	12	42	14	13
HGLibA_01935	ANK1	x	65	111	97	32	15	0	77	74	112
HGLibA_01936	ANK2	x	219	109	345	242	53	43	364	269	347
HGLibA_01937	ANK2	x	149	74	183	427	398	433	168	141	278
HGLibA_01938	ANK2	x	108	65	140	1861	223	2494	214	265	281
HGLibA_01939	ANK3	x	378	227	425	646	131	1549	347	408	400
HGLibA_01940	ANK3	x	327	206	575	567	483	876	559	563	374
HGLibA_01941	ANK3	x	72	45	94	53	20	7	85	28	25
HGLibA_01942	ANKAR	x	129	82	154	113	17	405	203	228	183
HGLibA_01943	ANKAR	x	41	41	75	42	0	0	60	130	13
HGLibA_01944	ANKAR	x	214	167	367	1495	219	189	580	302	410
HGLibA_01945	ANKDD1A	x	69	68	52	49	10	9	32	76	52
HGLibA_01946	ANKDD1A	x	81	79	88	207	420	92	41	260	159
HGLibA_01947	ANKDD1A	x	25	35	56	7	95	11	35	58	21
HGLibA_01948	ANKDD1B	x	145	143	258	260	40	99	181	203	237
HGLibA_01949	ANKDD1B	x	228	136	243	90	168	168	162	218	205
HGLibA_01950	ANKDD1B	x	52	11	54	0	0	38	69	33	76
HGLibA_01951	ANKEF1	x	138	106	146	3	448	9	152	185	117
HGLibA_01952	ANKEF1	x	132	61	171	213	26	288	258	141	143
HGLibA_01953	ANKEF1	x	91	78	93	252	11	78	86	104	131
HGLibA_01954	ANKFN1	x	49	28	75	38	15	0	41	79	22
HGLibA_01955	ANKFN1	x	101	55	39	13	8	7	84	81	21
HGLibA_01956	ANKFN1	x	131	97	277	26	183	1431	161	299	254
HGLibA_01957	ANKFY1	x	279	129	190	180	114	69	293	250	244
HGLibA_01958	ANKFY1	x	79	41	94	24	166	116	52	92	75
HGLibA_01959	ANKFY1	x	4	12	15	7	0	8	2	37	9
HGLibA_01960	ANKH	x	155	158	185	319	127	59	351	154	302
HGLibA_01961	ANKH	x	94	18	45	279	122	0	26	77	51
HGLibA_01962	ANKH	x	183	99	143	204	962	94	288	121	383
HGLibA_01963	ANKHD1	x	249	81	234	253	280	774	255	202	127
HGLibA_01965	ANKHD1	x	38	20	57	0	13	25	12	29	34
HGLibA_01966	ANKHD1-EIF4EBP3	x	323	146	283	863	95	240	290	203	115
HGLibA_01967;HGLibA_01964	ANKHD1-EIF4EBP3;ANKHD1	x	104	51	237	245	17	995	285	225	260
HGLibA_01968	ANKHD1-EIF4EBP3	x	180	97	102	27	268	23	54	74	19
HGLibA_01969	ANKIB1	x	104	64	208	6	8	385	153	140	118
HGLibA_01970	ANKIB1	x	69	39	74	5	0	21	113	101	62
HGLibA_01971	ANKIB1	x	177	145	208	163	161	11	261	355	306
HGLibA_01972	ANKK1	x	144	91	121	47	67	547	112	117	221
HGLibA_01973	ANKK1	x	49	25	77	92	4	0	109	54	58
HGLibA_01974	ANKK1	x	223	177	289	471	426	199	297	445	414
HGLibA_01975	ANKLE2	x	135	87	155	170	83	22	142	160	170
HGLibA_01976	ANKLE2	x	3	13	6	0	18	0	8	1	0
HGLibA_01977	ANKLE2	x	61	65	87	0	44	4	67	15	16
HGLibA_01978	ANKMY1	x	68	43	97	11	3	96	120	145	108
HGLibA_01979	ANKMY1	x	190	96	182	162	88	0	332	217	234
HGLibA_01980	ANKMY1	x	81	70	123	8	236	18	133	61	67
HGLibA_01981	ANKMY2	x	6	2	11	529	5	9	0	24	27
HGLibA_01982	ANKMY2	x	166	88	146	11	9	15	68	26	43
HGLibA_01983	ANKMY2	x	178	60	144	45	13	68	407	75	310
HGLibA_01984	ANKRA2	x	167	142	282	161	69	93	104	243	208
HGLibA_01985	ANKRA2	x	92	75	171	43	19	37	81	52	108
HGLibA_01986	ANKRA2	x	281	176	317	165	1222	296	579	337	261
HGLibA_01987	ANKRD1	x	72	48	62	176	1	0	169	74	63
HGLibA_01988	ANKRD1	x	42	50	94	26	0	9	28	120	131
HGLibA_01989	ANKRD1	x	123	105	184	73	28	569	277	184	303
HGLibA_01990	ANKRD10	x	56	20	34	123	0	0	78	35	24
HGLibA_01991	ANKRD10	x	363	215	414	484	731	277	394	182	479
HGLibA_01992	ANKRD10	x	407	246	395	234	79	114	247	285	506
HGLibA_01993	ANKRD11	x	111	53	81	127	9	254	257	148	102
HGLibA_01994	ANKRD11	x	72	60	89	96	86	22	213	79	144
HGLibA_01995	ANKRD11	x	9	8	19	203	0	0	46	9	0
HGLibA_01996	ANKRD12	x	16	7	25	128	15	0	3	106	31
HGLibA_01997	ANKRD12	x	40	43	94	16	24	3	93	31	83
HGLibA_01998	ANKRD12	x	79	100	125	40	83	9	285	144	190
HGLibA_01999	ANKRD13A	x	48	84	169	140	17	0	98	139	196
HGLibA_02000	ANKRD13A	x	39	25	68	0	6	0	18	11	51
HGLibA_02001	ANKRD13A	x	178	128	255	285	23	36	140	151	152
HGLibA_02002	ANKRD13B	x	168	156	245	39	106	5	56	182	66
HGLibA_02003	ANKRD13B	x	36	30	27	4	161	14	173	51	23
HGLibA_02004	ANKRD13B	x	115	81	134	36	12	0	275	184	165
HGLibA_02005	ANKRD13C	x	96	116	140	228	50	106	163	257	81
HGLibA_02006	ANKRD13C	x	427	234	505	242	97	1044	409	323	610
HGLibA_02007	ANKRD13C	x	9	18	25	0	11	0	6	0	17
HGLibA_02008	ANKRD13D	x	10	17	22	9	0	0	11	2	16
HGLibA_02009	ANKRD13D	x	42	22	41	0	3	0	73	42	23
HGLibA_02010	ANKRD13D	x	102	60	138	132	92	34	169	110	160
HGLibA_02011	ANKRD16	x	292	216	355	437	118	174	435	630	297
HGLibA_02012	ANKRD16	x	81	78	187	50	5	80	144	111	103
HGLibA_02013	ANKRD16	x	63	44	119	3	10	47	208	170	118
HGLibA_02014	ANKRD17	x	32	39	72	8	0	8	15	14	67
HGLibA_02015	ANKRD17	x	311	254	265	126	826	188	211	238	72
HGLibA_02016	ANKRD17	x	23	2	79	0	0	0	3	0	6
HGLibA_02017	ANKRD18A	x	391	164	406	2864	96	83	433	427	598
HGLibA_02018	ANKRD18A	x	35	11	33	63	27	45	53	3	34
HGLibA_02019	ANKRD18A	x	16	10	15	0	0	7	22	37	11
HGLibA_02020	ANKRD18B	x	50	26	48	0	880	120	21	39	11
HGLibA_02021	ANKRD18B	x	201	98	150	72	274	29	290	275	249
HGLibA_02022	ANKRD18B	x	70	47	90	0	19	0	163	103	38
HGLibA_02023	ANKRD2	x	67	53	145	88	50	32	36	56	177
HGLibA_02024	ANKRD2	x	65	97	140	31	34	0	113	171	97
HGLibA_02025	ANKRD2	x	78	74	162	101	171	15	240	31	87
HGLibA_02026	ANKRD20A1	x	13	62	68	33	14	0	106	119	65
HGLibA_02034	ANKRD20A3	x	105	42	120	42	20	4	89	11	46
HGLibA_02035;HGLibA_02033;HGLibA_02029;HGLibA_02027	ANKRD20A4;ANKRD20A3;ANKRD20A2;ANKRD20A1	x	234	102	252	72	3554	0	171	34	69
[truncated: 61,941 more rows]
