# Supplementary material for: TLE3 loss confers AR inhibitor resistance by facilitating GR-mediated human prostate cancer cell growth
Source: eLife. 2019 Dec 19;8:e47430. doi: 10.7554/eLife.47430 (PMC6968917; doi:10.7554/eLife.47430)
Supplement: Figure 1—source data 3. — Output file showing the raw data obtained with MAGeCK for the CRISPR resistance screen. For each gRNA the results, as indicated at the top of each column, are shown. [file elife-47430-fig1-data3.xls]

## Sheet: MAGeCK screen analysis
Figure 1-source data 3: MAGeCK analysis output
id	num	neg|score	neg|p-value	neg|fdr	neg|rank	neg|goodsgrna	pos|score	pos|p-value	pos|fdr	pos|rank	pos|goodsgrna
TLE3	3	1	1	1	22020	0	1.4859e-08	2.2481e-07	0.00165	1	3
AIP	3	0.99993	0.99992	1	22018	0	5.3014e-08	2.2481e-07	0.00165	2	3
ZIC2	3	1	1	1	22021	0	1.0278e-07	2.2481e-07	0.00165	3	3
CPEB4	3	0.98399	0.98412	0.99999	21650	0	7.2789e-07	2.0233e-06	0.011139	4	3
MNT	3	0.99975	0.99974	0.99999	22014	0	3.6898e-05	0.00010409	0.458416	5	3
AK3	3	0.99993	0.99993	1	22019	0	6.7979e-05	0.00018592	0.682343	6	3
FOXR1	3	0.99988	0.99987	1	22017	0	0.00011535	0.00032485	0.824684	7	3
CHD8	3	0.65245	0.68978	0.99999	15170	1	0.00011729	0.00032799	0.824684	8	2
LOC100131094	3	0.84672	0.84727	0.99999	18570	0	0.00013103	0.00036846	0.824684	9	2
INPP4B	3	0.84691	0.84746	0.99999	18576	0	0.00016028	0.0004404	0.824684	10	2
S100A5	3	0.99953	0.99952	0.99999	22007	0	0.00018726	0.00052043	0.824684	11	3
FAM73A	3	0.99823	0.99827	0.99999	21976	0	0.00019097	0.00053055	0.824684	12	3
PEX6	3	0.69691	0.72033	0.99999	15807	1	0.00019925	0.000551	0.824684	13	2
GCG	3	0.99977	0.99976	0.99999	22016	0	0.00022789	0.00063553	0.824684	14	3
NEURL1B	3	0.01208	0.03088	0.961145	677	1	0.00023328	0.00065127	0.824684	15	2
ABRA	3	0.99976	0.99975	0.99999	22015	0	0.00024237	0.00068184	0.824684	16	3
C2CD5	3	0.19624	0.3173	0.997217	6995	1	0.00025775	0.00071826	0.824684	17	2
TGM3	3	0.74433	0.75579	0.99999	16558	1	0.00025804	0.00071916	0.824684	18	2
BAALC	3	0.99858	0.9986	0.99999	21983	0	0.00026734	0.00074794	0.824684	19	3
GZMA	3	0.99971	0.99969	0.99999	22013	0	0.00029399	0.00081987	0.824684	20	3
SIRT1	3	0.97511	0.97536	0.99999	21445	0	0.00030495	0.0008491	0.824684	21	3
OR2L8	3	0.99968	0.99966	0.99999	22012	0	0.00032422	0.00089946	0.824684	22	3
AHR	3	0.25066	0.37843	0.997908	8304	1	0.00033543	0.00092868	0.824684	23	2
MTNR1A	3	0.98876	0.98889	0.99999	21759	0	0.00035186	0.00097814	0.824684	24	3
C9orf131	3	0.99963	0.99962	0.99999	22011	0	0.00036693	0.0010209	0.824684	25	3
AKAP17A_Y;AKAP17A_X	3	0.99962	0.9996	0.99999	22010	0	0.00037983	0.0010541	0.824684	26	3
ANK2	3	0.57074	0.63876	0.99999	14058	1	0.00038543	0.001073	0.824684	27	2
PHF7	3	0.99961	0.9996	0.99999	22009	0	0.00038601	0.0010739	0.824684	28	3
LGALS2	3	0.9713	0.97147	0.99999	21350	0	0.00039179	0.001086	0.824684	29	3
CFHR2	3	0.33438	0.46898	0.997908	10307	1	0.00041994	0.0011611	0.85231	30	2
NFXL1	3	0.25487	0.38304	0.997908	8389	1	0.00044567	0.0012268	0.871447	31	1
NonTargetingControlGuideForHuman_0610	1	0.99954	0.99953	0.99999	22008	0	0.00046138	0.0012699	0.873917	32	1
APP	3	0.018303	0.045793	0.963384	1046	1	0.00049258	0.0013518	0.882308	33	1
OR1L1	3	0.91788	0.91791	0.99999	20055	0	0.00050658	0.00139	0.882308	34	2
FAM122C	3	0.99946	0.99946	0.99999	22006	0	0.00053528	0.0014624	0.882308	35	3
TM9SF4	3	0.38604	0.52384	0.997981	11539	2	0.00053948	0.0014772	0.882308	36	1
PMS2	3	0.99945	0.99945	0.99999	22005	0	0.0005509	0.0015073	0.882308	37	3
ARHGEF35	3	0.99943	0.99942	0.99999	22004	0	0.00057229	0.0015662	0.882308	38	3
DHH	3	0.9994	0.9994	0.99999	22003	0	0.00059656	0.0016292	0.882308	39	3
MLH3	3	0.9994	0.99939	0.99999	22002	0	0.00060257	0.0016449	0.882308	40	3
GTF3C6	3	0.99939	0.99938	0.99999	22001	0	0.000613	0.0016764	0.882308	41	3
TENM2	3	0.14907	0.26142	0.992833	5791	1	0.00063328	0.0017299	0.882308	42	2
AKAP4	3	0.96712	0.96722	0.99999	21229	0	0.00065228	0.001783	0.882308	43	3
SNX19	3	0.99933	0.99933	0.99999	22000	0	0.00067454	0.0018374	0.882308	44	3
UBE2E3	3	0.33537	0.47005	0.997908	10336	2	0.00068018	0.0018513	0.882308	45	1
FGA	3	0.99932	0.99932	0.99999	21999	0	0.00068324	0.0018612	0.882308	46	3
CTNNA1	3	0.0031637	0.0085124	0.961145	179	1	0.00070537	0.0019156	0.882308	47	2
C2orf80	3	0.99927	0.99927	0.99999	21998	0	0.00072748	0.0019758	0.882308	48	3
ENPP1	3	0.80968	0.81147	0.99999	17754	1	0.0007385	0.0020073	0.882308	49	2
ASPHD2	3	0.87039	0.87073	0.99999	19042	0	0.00077398	0.0021067	0.882308	50	2
hsa-mir-454	4	0.082391	0.17853	0.976877	4007	3	0.00078177	0.0021269	0.882308	51	1
C12orf79	3	0.99565	0.99574	0.99999	21903	0	0.00079337	0.0021602	0.882308	52	3
LAGE3	3	0.99918	0.99918	0.99999	21997	0	0.00082118	0.0022447	0.882308	53	3
EDARADD	3	0.99918	0.99917	0.99999	21996	0	0.00082489	0.0022532	0.882308	54	3
RTL1	3	0.87164	0.87196	0.99999	19074	0	0.00086116	0.0023499	0.882308	55	2
TMEM19	3	0.050334	0.11571	0.976877	2557	2	0.00086776	0.0023684	0.882308	56	1
RABEPK	3	0.99912	0.99913	0.99999	21995	0	0.00087799	0.0023935	0.882308	57	3
ARL4A	3	0.39976	0.53828	0.997981	11840	1	0.00091466	0.0024938	0.882308	58	2
PRODH	3	0.99907	0.99907	0.99999	21994	0	0.00093287	0.0025401	0.882308	59	3
FOSB	3	0.34961	0.48545	0.997908	10678	1	0.0009514	0.0025905	0.882308	60	2
BAZ1B	3	0.81911	0.82047	0.99999	17951	1	0.00096155	0.0026152	0.882308	61	2
SLC36A2	3	0.999	0.99901	0.99999	21993	0	0.00099934	0.0027092	0.882308	62	3
ZNF547	3	0.999	0.99901	0.99999	21992	0	0.0010031	0.0027186	0.882308	63	3
SERINC4	3	0.083982	0.1815	0.976877	4082	1	0.0010084	0.0027357	0.882308	64	2
PKP1	3	0.48955	0.59093	0.999924	13011	1	0.0010553	0.0028652	0.882308	65	1
RNASE10	3	0.33406	0.46866	0.997908	10295	1	0.0010617	0.0028773	0.882308	66	2
FHOD3	3	0.91195	0.91207	0.99999	19939	0	0.0010774	0.0029272	0.882308	67	2
HTATIP2	3	0.99891	0.99893	0.99999	21991	0	0.0010881	0.0029529	0.882308	68	3
hsa-mir-138-2	4	0.72688	0.7424	0.99999	16281	1	0.0010943	0.0029708	0.882308	69	2
SETDB1	3	0.74057	0.75284	0.99999	16497	1	0.0011022	0.0029974	0.882308	70	1
HIST1H4A	3	0.9989	0.99891	0.99999	21990	0	0.0011041	0.0030028	0.882308	71	3
TAAR9	3	0.99889	0.99891	0.99999	21989	0	0.0011091	0.0030149	0.882308	72	3
ACAT1	3	0.97052	0.97065	0.99999	21331	0	0.0011254	0.0030599	0.882308	73	3
ELOF1	3	0.61737	0.66746	0.99999	14674	1	0.0011491	0.0031152	0.882308	74	1
OR51D1	3	0.87682	0.877	0.99999	19187	0	0.0011835	0.0032123	0.882308	75	2
UNC93A	3	0.26959	0.39911	0.997908	8746	2	0.001196	0.0032474	0.882308	76	1
hsa-mir-34a	4	0.9988	0.99882	0.99999	21988	0	0.0012037	0.0032694	0.882308	77	4
C14orf105	3	0.69321	0.7177	0.99999	15752	1	0.0012131	0.0032984	0.882308	78	2
NKX3-2	3	0.99876	0.99878	0.99999	21987	0	0.0012396	0.0033827	0.882308	79	3
PITPNA	3	0.99873	0.99875	0.99999	21986	0	0.0012658	0.0034371	0.882308	80	3
ACD	3	0.35493	0.49113	0.997908	10813	2	0.0012897	0.0035041	0.882308	81	1
SPERT	3	0.9987	0.99872	0.99999	21985	0	0.0013029	0.0035378	0.882308	82	3
LRRTM1	3	0.3494	0.48522	0.997908	10673	1	0.0013041	0.0035409	0.882308	83	2
KARS	3	0.69716	0.72053	0.99999	15813	1	0.0013312	0.0036147	0.882308	84	2
MSH6	3	0.99625	0.99632	0.99999	21921	0	0.001341	0.0036394	0.882308	85	3
HIST1H2BG	3	0.99863	0.99865	0.99999	21984	0	0.001373	0.0037248	0.882308	86	3
SLC20A1	3	0.9962	0.99627	0.99999	21918	0	0.0013963	0.0037887	0.882308	87	3
IKBKB	3	0.25792	0.38634	0.997908	8463	2	0.0014304	0.00388	0.882308	88	1
ARPC5L	3	0.99856	0.99859	0.99999	21982	0	0.0014377	0.0039011	0.882308	89	3
hsa-mir-532	4	0.46745	0.57865	0.998309	12764	1	0.0014529	0.0039362	0.882308	90	3
KRT76	3	0.99851	0.99853	0.99999	21981	0	0.0014904	0.0040337	0.882308	91	3
TMEM41A	3	0.088842	0.18748	0.978028	4216	1	0.001506	0.0040715	0.882308	92	2
MARCH3	3	0.54717	0.62437	0.99999	13731	1	0.0015241	0.0041183	0.882308	93	2
ANKRD23	3	0.83394	0.83479	0.99999	18281	0	0.0015604	0.0042068	0.882308	94	2
DENND1C	3	0.89128	0.89126	0.99999	19490	0	0.001571	0.0042392	0.882308	95	1
hsa-mir-374a	4	0.21175	0.33516	0.997908	7374	1	0.0015995	0.0043147	0.882308	96	3
LST1	3	0.21168	0.33507	0.997908	7372	1	0.0016179	0.0043624	0.882308	97	2
ISL2	3	0.98435	0.98447	0.99999	21662	0	0.001635	0.0044195	0.882308	98	3
hsa-mir-509-3	2	0.39569	0.53397	0.997981	11750	1	0.0016415	0.0044406	0.882308	99	1
hsa-mir-6885	4	0.29877	0.43092	0.997908	9472	2	0.0016415	0.0044406	0.882308	100	2
POU4F2	3	0.99834	0.99838	0.99999	21980	0	0.0016566	0.0044838	0.882308	101	3
MTERFD2	3	0.027761	0.067476	0.976877	1503	2	0.0016647	0.0045063	0.882308	102	1
RAD23A	3	0.35397	0.49012	0.997908	10782	1	0.0016675	0.0045117	0.882308	103	2
BET3L	2	0.91936	0.9194	0.99999	20094	0	0.0016728	0.0045252	0.882308	104	2
MS4A2	3	0.9983	0.99834	0.99999	21979	0	0.0017017	0.004598	0.882308	105	3
ANK3	3	0.94401	0.94404	0.99999	20645	0	0.0017069	0.0046169	0.882308	106	2
ALDH8A1	3	0.58526	0.64776	0.99999	14253	1	0.0017116	0.0046268	0.882308	107	1
MLH1	3	0.99829	0.99832	0.99999	21978	0	0.0017131	0.0046299	0.882308	108	3
C22orf23	3	0.54465	0.62286	0.99999	13700	1	0.0017223	0.0046524	0.882308	109	2
DMRTC2	3	0.99827	0.99831	0.99999	21977	0	0.0017319	0.0046762	0.882308	110	3
OR56A3	3	0.98963	0.98977	0.99999	21775	0	0.0017445	0.0047077	0.882308	111	3
FOXA3	3	0.30182	0.4342	0.997908	9546	1	0.0017585	0.0047455	0.882308	112	2
PI4KA	3	0.99823	0.99827	0.99999	21975	0	0.0017735	0.0047837	0.882308	113	3
OR52E6	3	0.9974	0.99747	0.99999	21957	0	0.0017781	0.0047963	0.882308	114	3
hsa-mir-4751	4	0.23047	0.35634	0.997908	7836	2	0.0017818	0.0048057	0.882308	115	1
PTPMT1	3	0.95363	0.95373	0.99999	20858	0	0.0018053	0.0048583	0.882308	116	3
ZNF628	3	0.48429	0.588	0.999125	12954	1	0.0018233	0.0049019	0.882308	117	2
FAM25C	2	0.99817	0.99821	0.99999	21974	0	0.0018344	0.0049312	0.882308	118	2
MAVS	3	0.66502	0.6982	0.99999	15352	1	0.001837	0.0049357	0.882308	119	2
TUBB1	3	0.61661	0.66699	0.99999	14660	1	0.0018522	0.0049743	0.882308	120	1
hsa-mir-1276	4	0.56224	0.63347	0.99999	13932	1	0.0018542	0.0049797	0.882308	121	2
TFCP2	3	0.99813	0.99818	0.99999	21973	0	0.001873	0.0050278	0.882308	122	3
TRIM25	3	0.99811	0.99817	0.99999	21972	0	0.0018865	0.0050624	0.882308	123	3
PIAS1	3	0.46801	0.57897	0.998405	12768	1	0.001899	0.005098	0.882308	124	2
SLC41A3	3	0.85938	0.85978	0.99999	18816	0	0.0019037	0.0051119	0.882308	125	2
SMEK1	3	0.58724	0.64898	0.99999	14275	1	0.0019341	0.0051865	0.882308	126	2
PEX12	3	0.99806	0.99811	0.99999	21971	0	0.0019408	0.0052113	0.882308	127	3
FBXO15	3	0.64003	0.68174	0.99999	14975	1	0.0019459	0.0052243	0.882308	128	2
CHD7	3	0.52038	0.6087	0.99999	13378	1	0.0019623	0.005263	0.882308	129	2
RHOJ	3	0.99803	0.99808	0.99999	21970	0	0.0019701	0.0052868	0.882308	130	3
SGSM3	3	0.97242	0.9726	0.99999	21378	0	0.0019788	0.0053097	0.882308	131	3
KIFC2	3	0.97167	0.97185	0.99999	21362	0	0.0020193	0.0054167	0.882308	132	3
WDR78	3	0.071513	0.15772	0.976877	3522	2	0.0020396	0.0054703	0.882308	133	1
ZNF555	3	0.97715	0.97737	0.99999	21501	0	0.0020795	0.005571	0.882308	134	3
COQ2	3	0.14372	0.25488	0.992727	5652	2	0.0020865	0.0055898	0.882308	135	1
P2RX2	3	0.96317	0.96325	0.99999	21113	0	0.0021136	0.005664	0.882308	136	3
ARMCX1	3	0.99788	0.99794	0.99999	21969	0	0.0021159	0.0056721	0.882308	137	3
C1QTNF4	3	0.83111	0.83208	0.99999	18216	0	0.0021333	0.0057202	0.882308	138	2
UBE2S	3	0.60477	0.65973	0.99999	14506	1	0.0021702	0.0058187	0.882308	139	2
ZNF729	3	0.90122	0.90117	0.99999	19718	0	0.0021802	0.0058497	0.882308	140	2
GRIN2D	3	0.99778	0.99783	0.99999	21968	0	0.0022188	0.0059549	0.882308	141	3
RBM27	3	0.80797	0.80985	0.99999	17725	1	0.002227	0.005981	0.882308	142	2
C9orf50	3	0.99774	0.99779	0.99999	21967	0	0.0022638	0.0060741	0.882308	143	3
CEACAM7	3	0.99773	0.99779	0.99999	21966	0	0.0022671	0.0060804	0.882308	144	3
SEPT3	3	0.23219	0.35822	0.997908	7880	2	0.0022739	0.0060979	0.882308	145	1
TMC7	3	0.99772	0.99778	0.99999	21965	0	0.0022752	0.0061024	0.882308	146	3
B4GALNT2	3	0.99769	0.99774	0.99999	21964	0	0.0023111	0.0061977	0.882308	147	3
ST7	3	0.98027	0.98046	0.99999	21569	0	0.0023207	0.0062261	0.882308	148	3
IL1B	3	0.76851	0.77525	0.99999	16996	1	0.0023676	0.0063407	0.882308	149	2
NonTargetingControlGuideForHuman_0181	1	0.99763	0.99769	0.99999	21963	0	0.0023694	0.0063439	0.882308	150	1
HSP90B1	3	0.81889	0.82026	0.99999	17949	1	0.0023729	0.0063524	0.882308	151	2
ISYNA1	3	0.69124	0.71635	0.99999	15723	1	0.0024144	0.006459	0.882308	152	1
TIMP4	3	0.99756	0.99762	0.99999	21962	0	0.0024439	0.0065322	0.882308	153	3
SSTR5	3	0.99756	0.99762	0.99999	21961	0	0.0024448	0.0065336	0.882308	154	3
ELMOD3	3	0.99755	0.99761	0.99999	21960	0	0.0024516	0.0065471	0.882308	155	3
URAD;PRHOXNB	3	0.99755	0.99761	0.99999	21959	0	0.0024525	0.0065489	0.882308	156	3
NonTargetingControlGuideForHuman_0483	1	0.99752	0.99759	0.99999	21958	0	0.0024789	0.0066222	0.882308	157	1
HFE2	3	0.98977	0.9899	0.99999	21782	0	0.0025414	0.006793	0.882308	158	3
KANK2	3	0.86186	0.86223	0.99999	18868	0	0.0025575	0.0068344	0.882308	159	2
GSK3B	3	0.98989	0.99001	0.99999	21784	0	0.0025683	0.0068654	0.882308	160	3
ABCC12	3	0.98549	0.98564	0.99999	21685	0	0.0025764	0.006887	0.882308	161	3
GDF2	3	0.69038	0.71574	0.99999	15706	1	0.0025818	0.0069014	0.882308	162	2
SP100	3	0.73969	0.75218	0.99999	16479	1	0.0026018	0.0069553	0.882308	163	2
LDLRAD1	3	0.79838	0.80105	0.99999	17526	1	0.0026034	0.0069625	0.882308	164	2
MAGEB4	3	0.82294	0.82414	0.99999	18037	0	0.0026142	0.0069922	0.882308	165	2
IDH1	3	0.99736	0.99743	0.99999	21956	0	0.0026414	0.0070596	0.882308	166	3
SLC30A9	3	0.99736	0.99743	0.99999	21955	0	0.0026432	0.0070655	0.882308	167	3
SMAD6	3	0.38749	0.52539	0.997981	11577	1	0.0026486	0.0070794	0.882308	168	2
hsa-mir-6796	4	0.86678	0.86709	0.99999	18960	1	0.0026561	0.0071051	0.882308	169	3
SHF	3	0.99733	0.99741	0.99999	21954	0	0.0026657	0.0071361	0.882308	170	3
NCOA6	3	0.98111	0.98128	0.99999	21586	0	0.002688	0.00719	0.882308	171	3
hsa-mir-4684	4	0.53622	0.61787	0.99999	13593	2	0.0026939	0.0072053	0.882308	172	2
HAGH	3	0.99731	0.99738	0.99999	21953	0	0.0026947	0.0072062	0.882308	173	3
HOMER3	3	0.51344	0.60462	0.99999	13299	1	0.0026955	0.0072089	0.882308	174	2
hsa-mir-221	4	0.9973	0.99737	0.99999	21952	0	0.002696	0.0072107	0.882308	175	4
hsa-mir-941-4;hsa-mir-941-3;hsa-mir-941-2	2	0.99727	0.99734	0.99999	21951	0	0.0027296	0.0073033	0.882308	176	2
ULBP1	3	0.99727	0.99733	0.99999	21950	0	0.0027312	0.0073051	0.882308	177	3
WDR91	3	0.99726	0.99733	0.99999	21949	0	0.0027358	0.0073159	0.882308	178	3
GYPA	3	0.99726	0.99733	0.99999	21948	0	0.0027385	0.0073236	0.882308	179	3
ROM1	3	0.1088	0.21236	0.986885	4738	1	0.0027423	0.0073339	0.882308	180	2
CRP	3	0.99725	0.99731	0.99999	21947	0	0.0027486	0.0073532	0.882308	181	3
STRC	3	0.95696	0.95713	0.99999	20934	0	0.00276	0.0073825	0.882308	182	3
EEF1B2	3	0.79777	0.80053	0.99999	17513	1	0.0027891	0.0074647	0.882308	183	1
GTF2IRD1	3	0.21152	0.33489	0.997908	7368	1	0.002802	0.0074989	0.882308	184	2
SPATA20	3	0.99718	0.99725	0.99999	21946	0	0.002822	0.0075551	0.882308	185	3
USP17L30;USP17L29;USP17L28;USP17L27;USP17L26;USP17L25;USP17L24;USP17L22;USP17L21;USP17L20;USP17L19;USP17L18;USP17L17;USP17L12;USP17L11	1	0.99718	0.99725	0.99999	21945	0	0.002823	0.0075605	0.882308	186	1
GHR	3	0.86181	0.86217	0.99999	18867	0	0.0028828	0.0077107	0.882308	187	2
hsa-mir-4265	4	0.9971	0.99717	0.99999	21944	0	0.002896	0.0077386	0.882308	188	4
SEPT8	3	0.99709	0.99717	0.99999	21943	0	0.0029053	0.0077633	0.882308	189	3
AADACL2	3	0.29482	0.42666	0.997908	9362	1	0.0029126	0.007784	0.882308	190	2
PNPLA6	3	0.99707	0.99715	0.99999	21942	0	0.0029254	0.0078168	0.882308	191	3
SULT4A1	3	0.99707	0.99715	0.99999	21941	0	0.0029292	0.0078298	0.882308	192	3
hsa-mir-6728	4	0.17732	0.29503	0.995468	6509	2	0.0029345	0.0078433	0.882308	193	2
hsa-mir-4268	4	0.48665	0.58928	0.999125	12981	1	0.0029406	0.0078613	0.882308	194	3
hsa-mir-431	4	0.12779	0.23559	0.991184	5233	1	0.0029426	0.0078685	0.882308	195	3
TRAFD1	3	0.99705	0.99712	0.99999	21940	0	0.0029504	0.0078914	0.882308	196	3
hsa-mir-3689d-1	4	0.70385	0.72532	0.99999	15910	1	0.0029628	0.0079323	0.882308	197	3
SLC35F2	3	0.47222	0.58131	0.998811	12811	1	0.0029764	0.0079733	0.882308	198	2
PYDC1	3	0.99702	0.99709	0.99999	21939	0	0.0029765	0.0079733	0.882308	199	3
FOXD4L5	3	0.99601	0.99609	0.99999	21914	0	0.0030136	0.0080839	0.888257	200	3
UBXN4	3	0.58975	0.65055	0.99999	14308	1	0.0030233	0.0081077	0.888257	201	1
NOC2L	3	0.99694	0.997	0.99999	21938	0	0.0030648	0.0082179	0.892869	202	3
NUDT11	3	0.1373	0.24715	0.991965	5474	1	0.0030701	0.0082309	0.892869	203	1
SMIM6	3	0.55337	0.62802	0.99999	13815	1	0.0031163	0.0083491	0.893481	204	2
BMP4	3	0.018826	0.047009	0.968366	1069	2	0.0031169	0.0083509	0.893481	205	1
FPR3	3	0.99687	0.99693	0.99999	21937	0	0.0031296	0.0083842	0.893481	206	3
KCTD1	3	0.92076	0.92081	0.99999	20129	0	0.00314	0.0084148	0.893481	207	2
TOB1	3	0.82613	0.8273	0.99999	18102	0	0.0031549	0.0084517	0.893481	208	2
hsa-mir-6769b	4	0.74068	0.75292	0.99999	16500	1	0.0031657	0.00848	0.893481	209	3
TMEM159	3	0.9968	0.99687	0.99999	21936	0	0.0031963	0.0085605	0.895119	210	3
RAPGEFL1	3	0.057541	0.13029	0.976877	2914	2	0.0032106	0.0085969	0.895119	211	1
ACVR1	3	0.91391	0.914	0.99999	19983	0	0.0032207	0.0086302	0.895119	212	2
SURF6	3	0.47411	0.58238	0.998811	12836	1	0.0032574	0.0087246	0.895119	213	2
ARPC5	3	0.99671	0.99678	0.99999	21935	0	0.0032888	0.00881	0.895119	214	3
IL10RB	3	0.7774	0.78259	0.99999	17142	1	0.0033042	0.0088469	0.895119	215	2
FAM25G	2	0.99668	0.99675	0.99999	21934	0	0.0033243	0.008899	0.895119	216	2
SORCS2	3	0.15419	0.26752	0.992973	5931	2	0.003351	0.0089642	0.895119	217	1
EPS8L1	3	0.99664	0.99671	0.99999	21933	0	0.0033609	0.008984	0.895119	218	3
AGMAT	3	0.99235	0.99245	0.99999	21834	0	0.0034004	0.0090883	0.895119	219	3
hsa-mir-6069	4	0.9614	0.96152	0.99999	21060	0	0.0034051	0.0090987	0.895119	220	3
GLS	3	0.99658	0.99666	0.99999	21932	0	0.003417	0.0091333	0.895119	221	3
SIM1	3	0.99656	0.99663	0.99999	21931	0	0.0034426	0.009203	0.895119	222	3
DHRS4L1	3	0.74557	0.75679	0.99999	16584	1	0.0034446	0.009207	0.895119	223	2
MFN1	3	0.99654	0.99662	0.99999	21930	0	0.0034555	0.0092322	0.895119	224	3
KCTD3	2	0.99542	0.9955	0.99999	21899	0	0.0034847	0.0093023	0.895119	225	2
OR6S1	3	0.99651	0.99658	0.99999	21929	0	0.003491	0.0093203	0.895119	226	3
KRT27	3	0.91035	0.91045	0.99999	19899	0	0.0034914	0.0093221	0.895119	227	2
KCNJ3	3	0.99649	0.99656	0.99999	21928	0	0.0035137	0.0093851	0.895119	228	3
RNF151	3	0.99648	0.99655	0.99999	21927	0	0.0035213	0.0094062	0.895119	229	3
HIF3A	3	0.99646	0.99654	0.99999	21926	0	0.0035366	0.0094476	0.895119	230	3
MFAP3L	3	0.9618	0.96191	0.99999	21076	0	0.0035383	0.0094547	0.895119	231	3
CHP1	3	0.90244	0.9024	0.99999	19745	0	0.003547	0.0094741	0.895119	232	2
WBP2	3	0.73214	0.74637	0.99999	16356	1	0.0035502	0.0094826	0.895119	233	2
TRIM42	3	0.99643	0.9965	0.99999	21925	0	0.0035737	0.0095402	0.895119	234	3
RANBP6	3	0.99637	0.99645	0.99999	21924	0	0.0036288	0.0096602	0.895119	235	3
hsa-mir-4282	4	0.60921	0.66245	0.99999	14559	1	0.0036397	0.0096849	0.895119	236	3
BCL2L13	3	0.83259	0.8335	0.99999	18252	0	0.0036645	0.009756	0.895119	237	2
ACBD7	3	0.73012	0.74487	0.99999	16324	1	0.0036709	0.0097695	0.895119	238	2
ZNF600	3	0.99633	0.99641	0.99999	21923	0	0.0036744	0.009778	0.895119	239	3
GHITM	3	0.94403	0.94406	0.99999	20646	0	0.0036787	0.009787	0.895119	240	2
TF	3	0.99631	0.99639	0.99999	21922	0	0.003689	0.009818	0.895119	241	3
hsa-mir-3713	4	0.86379	0.86415	0.99999	18908	1	0.003698	0.0098369	0.895119	242	3
FUK	3	0.99623	0.9963	0.99999	21920	0	0.0037714	0.010037	0.895827	243	3
TP53	3	0.24938	0.37702	0.997908	8278	1	0.0037723	0.010039	0.895827	244	2
CLUAP1	3	0.99621	0.99629	0.99999	21919	0	0.003785	0.010071	0.895827	245	3
PHF6	3	0.45737	0.57307	0.997981	12641	1	0.0038191	0.010156	0.895827	246	2
GAB4	3	0.99615	0.99622	0.99999	21917	0	0.003848	0.010245	0.895827	247	3
SPG11	3	0.72553	0.7414	0.99999	16257	1	0.0038659	0.010287	0.895827	248	1
CASK	3	0.99613	0.99621	0.99999	21916	0	0.0038665	0.010289	0.895827	249	3
NEK6	3	0.63173	0.6764	0.99999	14861	1	0.0038722	0.010303	0.895827	250	2
DTX1	3	0.49623	0.5947	0.99999	13084	1	0.0038788	0.010322	0.895827	251	2
hsa-mir-892b	4	0.67592	0.70571	0.99999	15509	1	0.0039042	0.010374	0.895827	252	2
UGT2A2;UGT2A1	3	0.92898	0.92906	0.99999	20317	0	0.0039127	0.010398	0.895827	253	2
SPINK5	3	0.49855	0.59604	0.99999	13118	1	0.0039151	0.010405	0.895827	254	2
hsa-mir-373	4	0.99608	0.99616	0.99999	21915	0	0.0039197	0.010415	0.895827	255	4
PPAPDC1A	3	0.9815	0.98166	0.99999	21593	0	0.0039217	0.010424	0.895827	256	3
CBLN2	3	0.78317	0.78757	0.99999	17244	1	0.0039582	0.010524	0.895827	257	2
PPP1R3A	3	0.996	0.99608	0.99999	21913	0	0.004001	0.010626	0.895827	258	3
MYT1L	3	0.1774	0.29513	0.995468	6512	1	0.0040063	0.010641	0.895827	259	1
CACTIN	3	0.91613	0.91622	0.99999	20027	0	0.0040283	0.010699	0.895827	260	2
hsa-mir-553	2	0.77358	0.77944	0.99999	17082	0	0.0040466	0.010747	0.895827	261	1
SNX29	3	0.48982	0.59109	0.999924	13015	1	0.0040531	0.010761	0.895827	262	2
ATF7	3	0.68505	0.71201	0.99999	15629	1	0.004072	0.010809	0.895827	263	2
OSCAR	3	0.96667	0.96676	0.99999	21217	0	0.0040999	0.010871	0.895827	264	3
C2orf44	3	0.9959	0.99598	0.99999	21912	0	0.0041023	0.01088	0.895827	265	3
MTBP	3	0.99589	0.99597	0.99999	21911	0	0.0041083	0.010896	0.895827	266	3
SGK110	3	0.33995	0.47501	0.997908	10451	2	0.0041467	0.010994	0.895827	267	1
KDM6A	3	0.30837	0.44118	0.997908	9693	1	0.0041669	0.011052	0.895827	268	2
RRNAD1	3	0.99582	0.99591	0.99999	21910	0	0.0041761	0.011069	0.895827	269	3
FAM19A1	3	0.99582	0.99591	0.99999	21909	0	0.0041798	0.011079	0.895827	270	3
DNAJC21	3	0.32037	0.45403	0.997908	9977	1	0.0042148	0.011156	0.895827	271	2
hsa-mir-3936	4	0.12286	0.22962	0.991184	5094	1	0.0042343	0.01121	0.895827	272	3
KIF13B	3	0.16279	0.27775	0.994594	6148	2	0.0042402	0.011231	0.895827	273	1
MAGEA10-MAGEA5	3	0.99575	0.99584	0.99999	21908	0	0.0042458	0.011248	0.895827	274	3
CDC37	3	0.99575	0.99584	0.99999	21907	0	0.0042495	0.011255	0.895827	275	3
FAM151A	3	0.99574	0.99583	0.99999	21906	0	0.0042569	0.011277	0.895827	276	3
NABP2	3	0.94692	0.947	0.99999	20711	0	0.0042629	0.011293	0.895827	277	3
IL18BP	3	0.99573	0.99582	0.99999	21905	0	0.004273	0.011319	0.895827	278	3
VTI1A	3	0.45051	0.56927	0.997981	12553	1	0.004287	0.01135	0.895827	279	1
TRPT1	3	0.098903	0.20005	0.981804	4486	1	0.0043338	0.011468	0.899915	280	2
ASCC2	3	0.99566	0.99575	0.99999	21904	0	0.0043413	0.011483	0.899915	281	3
CYTIP	3	0.0082585	0.021499	0.961145	463	1	0.0043806	0.011587	0.904835	282	1
MTA2	3	0.9956	0.99569	0.99999	21902	0	0.004399	0.011634	0.905241	283	3
CRISPLD1	3	0.62178	0.67018	0.99999	14737	1	0.0044274	0.01171	0.906457	284	2
SEMA4C	3	0.80429	0.80638	0.99999	17655	1	0.0044741	0.011825	0.906457	285	1
FHL1	3	0.98118	0.98134	0.99999	21588	0	0.0044756	0.011831	0.906457	286	3
SIRPD	3	0.17116	0.28773	0.995468	6352	1	0.0044792	0.011843	0.906457	287	2
EVC2	3	0.9955	0.99558	0.99999	21901	0	0.0045044	0.01192	0.906457	288	3
IFNA14	3	0.1435	0.25461	0.992727	5646	2	0.0045209	0.011964	0.906457	289	1
FOXI2	3	0.73104	0.74557	0.99999	16337	1	0.0045323	0.011994	0.906457	290	2
NonTargetingControlGuideForHuman_0743	1	0.99546	0.99554	0.99999	21900	0	0.0045434	0.012028	0.906457	291	1
LDB1	3	0.8939	0.89389	0.99999	19551	0	0.0045677	0.012086	0.906457	292	2
STXBP2	3	0.76584	0.77302	0.99999	16946	1	0.0045714	0.012095	0.906457	293	2
SLC30A4	3	0.9954	0.99548	0.99999	21898	0	0.0045971	0.012166	0.906457	294	3
ABCC8	3	0.91485	0.91497	0.99999	20004	0	0.0046145	0.012207	0.906457	295	2
HDAC10	3	0.38345	0.52108	0.997981	11475	1	0.0046538	0.012301	0.906457	296	2
CPA6	3	0.99534	0.99543	0.99999	21897	0	0.0046557	0.012306	0.906457	297	3
FSD2	3	0.22005	0.34466	0.997908	7599	2	0.0046613	0.012319	0.906457	298	1
KCNJ10	3	0.48278	0.58716	0.999125	12937	1	0.004708	0.012433	0.906457	299	1
MBNL2	3	0.99527	0.99534	0.99999	21896	0	0.0047307	0.012487	0.906457	300	3
LOC440563	3	0.70976	0.7296	0.99999	16010	1	0.0047441	0.012518	0.906457	301	2
NonTargetingControlGuideForHuman_0753	1	0.99525	0.99533	0.99999	21895	0	0.0047467	0.012526	0.906457	302	1
PC	3	0.91353	0.91364	0.99999	19972	0	0.0047548	0.012543	0.906457	303	1
C9orf163	3	0.82259	0.82381	0.99999	18030	0	0.0047768	0.012601	0.906457	304	2
hsa-mir-8073	4	0.18692	0.30641	0.995468	6772	2	0.0047772	0.012602	0.906457	305	2
PPIC	3	0.98071	0.98088	0.99999	21576	0	0.0047878	0.012629	0.906457	306	3
KNCN	3	0.8289	0.82992	0.99999	18152	0	0.0047914	0.012637	0.906457	307	2
LUC7L3	3	0.45271	0.5705	0.997981	12583	1	0.0048483	0.012775	0.908384	308	2
PYCR2	3	0.99515	0.99523	0.99999	21894	0	0.0048534	0.012788	0.908384	309	3
QTRT1	3	0.93578	0.93585	0.99999	20467	0	0.0048536	0.012788	0.908384	310	2
C12orf52	3	0.99511	0.99519	0.99999	21893	0	0.0048858	0.012874	0.90986	311	3
FLVCR2	3	0.99511	0.99519	0.99999	21892	0	0.0048925	0.012891	0.90986	312	3
HIST4H4	3	0.99508	0.99515	0.99999	21891	0	0.0049237	0.012972	0.912647	313	3
PROKR1	3	0.2011	0.3229	0.997217	7114	1	0.0049419	0.013016	0.91283	314	1
NonTargetingControlGuideForHuman_0102	1	0.99502	0.99509	0.99999	21890	0	0.0049813	0.013112	0.916643	315	1
FGF14	3	0.99497	0.99504	0.99999	21889	0	0.0050262	0.013233	0.917538	316	3
UBE3C	3	0.99496	0.99503	0.99999	21888	0	0.0050414	0.013271	0.917538	317	3
TMEM104	3	0.87172	0.87205	0.99999	19077	0	0.0050613	0.013316	0.917538	318	2
PIGP	3	0.96805	0.96818	0.99999	21267	0	0.0050726	0.013343	0.917538	319	3
ZNF528	3	0.916	0.91608	0.99999	20025	0	0.0050822	0.01337	0.917538	320	2
PDE3A	3	0.50948	0.60234	0.99999	13249	1	0.0051101	0.013439	0.917538	321	2
hsa-mir-548z;hsa-mir-548c	3	0.83671	0.8375	0.99999	18341	0	0.0051289	0.013484	0.917538	322	2
ACP1	3	0.99487	0.99495	0.99999	21887	0	0.0051344	0.013495	0.917538	323	3
MYOM3	3	0.64977	0.68804	0.99999	15127	1	0.0051365	0.0135	0.917538	324	2
DSTN	3	0.77417	0.77992	0.99999	17093	1	0.0051757	0.013599	0.921417	325	2
DAPK2	3	0.60424	0.6594	0.99999	14499	1	0.0052692	0.013826	0.924326	326	2
NMRK1	3	0.32749	0.46157	0.997908	10143	1	0.0052732	0.013833	0.924326	327	2
MED29	3	0.72737	0.74278	0.99999	16290	1	0.0052809	0.013849	0.924326	328	2
ESCO2	3	0.96652	0.96661	0.99999	21207	0	0.0053	0.013892	0.924326	329	3
CXCL9	3	0.95202	0.95212	0.99999	20834	0	0.0053077	0.013914	0.924326	330	3
hsa-mir-3689f	4	0.023285	0.057327	0.976877	1285	1	0.0053107	0.01392	0.924326	331	3
USP39	3	0.96147	0.9616	0.99999	21062	0	0.0053159	0.013936	0.924326	332	3
XAGE1E;XAGE1D;XAGE1C;XAGE1B;XAGE1A	3	0.99466	0.99475	0.99999	21886	0	0.0053352	0.013986	0.92488	333	3
TAL2	3	0.36197	0.49854	0.997908	10991	1	0.0053627	0.014061	0.927032	334	2
ZCCHC16	3	0.77733	0.78254	0.99999	17140	1	0.0053962	0.01415	0.930146	335	2
PLA2G4B	3	0.99458	0.99466	0.99999	21885	0	0.0054188	0.014198	0.930531	336	3
CYP26A1	3	0.96301	0.9631	0.99999	21109	0	0.0054562	0.014301	0.934498	337	3
VHL	3	0.9945	0.99459	0.99999	21884	0	0.0054958	0.014406	0.937074	338	3
CST2	3	0.77008	0.77654	0.99999	17022	1	0.0055479	0.014545	0.937074	339	2
ZDHHC2	3	0.37571	0.51292	0.997908	11308	2	0.0055497	0.01455	0.937074	340	1
hsa-mir-192	4	0.81611	0.81753	0.99999	17885	1	0.0055873	0.014656	0.937074	341	3
SH2D5	3	0.97135	0.97152	0.99999	21351	0	0.0055964	0.014682	0.937074	342	3
KIAA0895	3	0.37103	0.5081	0.997908	11200	1	0.0056108	0.014721	0.937074	343	2
SPATA4	3	0.84735	0.84789	0.99999	18585	0	0.0056432	0.014801	0.937074	344	1
MKRN2	3	0.99435	0.99444	0.99999	21883	0	0.0056477	0.014806	0.937074	345	3
BLOC1S2	3	0.60646	0.66075	0.99999	14523	1	0.0056502	0.014811	0.937074	346	2
hsa-mir-7973-2;hsa-mir-7973-1	4	0.075671	0.16565	0.976877	3693	1	0.0056755	0.014869	0.937074	347	3
ZSWIM3	3	0.87404	0.8743	0.99999	19136	0	0.0056858	0.014898	0.937074	348	2
RLN1	3	0.99431	0.9944	0.99999	21882	0	0.005691	0.014914	0.937074	349	3
RAB11FIP1	3	0.9943	0.99439	0.99999	21881	0	0.0057	0.014933	0.937074	350	3
PPP2R2B	3	0.99429	0.99438	0.99999	21880	0	0.0057149	0.014963	0.937074	351	3
PXDC1	3	0.61556	0.66635	0.99999	14647	1	0.0057255	0.014991	0.937074	352	2
SPHKAP	3	0.65014	0.68828	0.99999	15132	1	0.0057367	0.015021	0.937074	353	2
EFCAB9	3	0.3732	0.51034	0.997908	11254	1	0.0057834	0.015136	0.939585	354	1
RASSF1	3	0.99421	0.99431	0.99999	21879	0	0.0057888	0.015154	0.939585	355	3
PLK1S1	3	0.62139	0.66995	0.99999	14733	1	0.0058053	0.01519	0.939585	356	2
EHMT1	3	0.84959	0.85006	0.99999	18624	0	0.0058301	0.015256	0.939585	357	2
PARK2	3	0.32663	0.46065	0.997908	10121	1	0.0058374	0.015275	0.939585	358	2
MDFIC	3	0.75172	0.76154	0.99999	16703	1	0.005922	0.015506	0.942634	359	2
ZNF317	3	0.13544	0.24485	0.991965	5426	2	0.0059236	0.015509	0.942634	360	1
HTR3C	3	0.99407	0.99416	0.99999	21878	0	0.0059306	0.015521	0.942634	361	3
NonTargetingControlGuideForHuman_0456	1	0.99405	0.99414	0.99999	21877	0	0.005951	0.015588	0.942634	362	1
USP33	3	0.20421	0.32651	0.997217	7208	1	0.0059703	0.015637	0.942634	363	1
RNF185	3	0.99401	0.9941	0.99999	21876	0	0.0059923	0.015702	0.942634	364	3
RBM14-RBM4;RBM14	1	0.994	0.99409	0.99999	21875	0	0.0059979	0.015715	0.942634	365	1
NFKBIL1	3	0.994	0.99409	0.99999	21874	0	0.006	0.015717	0.942634	366	3
IL3RA_Y;IL3RA_X	3	0.99399	0.99409	0.99999	21873	0	0.0060062	0.015732	0.942634	367	3
WDR83	3	0.70664	0.72735	0.99999	15960	1	0.0060171	0.015763	0.942634	368	2
LCE1B	3	0.99395	0.99405	0.99999	21872	0	0.0060466	0.015832	0.942634	369	3
SUPT20HL1	3	0.99391	0.99402	0.99999	21871	0	0.0060856	0.015931	0.942634	370	3
ARHGEF1	3	0.9939	0.99401	0.99999	21870	0	0.006095	0.015957	0.942634	371	3
MDH2	3	0.74936	0.75967	0.99999	16659	1	0.0061105	0.015991	0.942634	372	1
NDUFA10	3	0.99389	0.99399	0.99999	21869	0	0.0061138	0.015999	0.942634	373	3
INPP5D	3	0.38012	0.51758	0.997981	11417	1	0.0061573	0.016111	0.942634	374	2
CT47A9;CT47A8;CT47A7;CT47A6;CT47A5;CT47A4;CT47A3;CT47A2;CT47A12;CT47A11;CT47A10;CT47A1	2	0.99381	0.99391	0.99999	21868	0	0.00619	0.016196	0.942634	375	2
LRRC61	3	0.65187	0.6894	0.99999	15154	1	0.006204	0.016232	0.942634	376	2
HNRNPAB	3	0.99379	0.9939	0.99999	21867	0	0.0062053	0.016236	0.942634	377	3
EEF1A1	3	0.99378	0.99388	0.99999	21866	0	0.0062211	0.016275	0.942634	378	3
NACC2	3	0.51367	0.60476	0.99999	13303	1	0.0062289	0.016295	0.942634	379	2
UPK3A	3	0.9493	0.94944	0.99999	20761	0	0.0062507	0.016351	0.942634	380	3
P4HA1	3	0.31529	0.44864	0.997908	9855	2	0.0062974	0.016476	0.942634	381	1
IGFL1	3	0.99368	0.9938	0.99999	21865	0	0.0063184	0.016536	0.942634	382	3
IPO8	3	0.99367	0.99378	0.99999	21864	0	0.0063313	0.016563	0.942634	383	3
hsa-mir-6841	4	0.99363	0.99375	0.99999	21863	0	0.0063687	0.016661	0.942634	384	4
USH2A	3	0.99362	0.99374	0.99999	21862	0	0.0063796	0.01669	0.942634	385	3
FAM149A	3	0.99322	0.99332	0.99999	21856	0	0.0063831	0.016701	0.942634	386	3
PPCS	3	0.27176	0.4015	0.997908	8801	2	0.0063909	0.016715	0.942634	387	1
hsa-mir-181a-2	4	0.36106	0.49764	0.997908	10965	2	0.006397	0.016731	0.942634	388	1
PRR23A	3	0.73348	0.74738	0.99999	16381	1	0.0063999	0.01674	0.942634	389	2
CD207	3	0.65596	0.69209	0.99999	15218	1	0.0064209	0.0168	0.942634	390	2
CD33	3	0.99357	0.99368	0.99999	21861	0	0.006433	0.016832	0.942634	391	3
GULP1	3	0.73254	0.7467	0.99999	16363	1	0.0064376	0.016841	0.942634	392	1
BAGE5;BAGE4;BAGE3	2	0.70543	0.72648	0.99999	15940	0	0.00648	0.016944	0.942634	393	1
WRB	3	0.36586	0.50265	0.997908	11082	2	0.0064843	0.016956	0.942634	394	1
LTBP2	3	0.039012	0.092228	0.976877	2046	2	0.006531	0.01707	0.942634	395	1
FMO4	3	0.53099	0.61482	0.99999	13520	1	0.0065603	0.017142	0.942634	396	2
CDKN2C	3	0.67076	0.70212	0.99999	15433	1	0.0065901	0.017213	0.942634	397	2
NonTargetingControlGuideForHuman_0910	1	0.99341	0.99351	0.99999	21860	0	0.0065922	0.017217	0.942634	398	1
hsa-mir-6852	4	0.99338	0.99348	0.99999	21859	0	0.0066162	0.017269	0.942634	399	4
SPATA19	3	0.17925	0.29738	0.995468	6570	2	0.0066245	0.017291	0.942634	400	1
SPOCK3	3	0.74536	0.75661	0.99999	16579	1	0.0066327	0.017312	0.942634	401	2
hsa-mir-3160-2;hsa-mir-3160-1	4	0.074195	0.16284	0.976877	3630	2	0.006646	0.017342	0.942634	402	1
hsa-mir-4727	4	0.99333	0.99343	0.99999	21858	0	0.0066686	0.017398	0.942634	403	4
MEOX2	3	0.8399	0.84063	0.99999	18409	0	0.0066712	0.017405	0.942634	404	2
PINK1	3	0.90512	0.90511	0.99999	19795	0	0.0066969	0.017471	0.942634	405	2
hsa-mir-563	4	0.66876	0.70074	0.99999	15397	1	0.0067394	0.017582	0.942634	406	3
OR2T3	3	0.97728	0.9775	0.99999	21506	0	0.0067442	0.017594	0.942634	407	3
OR9A2	3	0.99324	0.99334	0.99999	21857	0	0.006758	0.017626	0.942634	408	3
NonTargetingControlGuideForHuman_0082	1	0.99322	0.99331	0.99999	21855	0	0.0067799	0.017681	0.942634	409	1
hsa-mir-181b-1	4	0.93378	0.93389	0.99999	20423	0	0.0068088	0.017755	0.942634	410	2
NonTargetingControlGuideForHuman_0611	1	0.99319	0.99328	0.99999	21854	0	0.0068112	0.017762	0.942634	411	1
FES	3	0.88545	0.88546	0.99999	19360	0	0.0068113	0.017762	0.942634	412	2
PRSS55	3	0.53424	0.61675	0.99999	13562	1	0.0068219	0.017778	0.942634	413	2
UBOX5	3	0.76123	0.76917	0.99999	16870	1	0.0068479	0.017838	0.942634	414	2
CHPF	3	0.52276	0.61004	0.99999	13414	1	0.006858	0.017857	0.942634	415	2
hsa-let-7i	4	0.29739	0.42946	0.997908	9440	2	0.0068814	0.017924	0.942634	416	2
B3GALNT1	3	0.50972	0.60247	0.99999	13252	1	0.0068826	0.017929	0.942634	417	2
FAHD1	3	0.64739	0.68649	0.99999	15094	1	0.0069047	0.01799	0.942634	418	1
CCL3L3;CCL3L1	3	0.99307	0.99316	0.99999	21853	0	0.0069254	0.01805	0.942634	419	3
BCL2A1	3	0.87328	0.87357	0.99999	19117	0	0.0069262	0.018052	0.942634	420	2
TRDN	3	0.99306	0.99315	0.99999	21852	0	0.0069374	0.01808	0.942634	421	3
RXRG	3	0.84518	0.84579	0.99999	18535	0	0.0069514	0.018113	0.942634	422	2
hsa-mir-4455	4	0.52802	0.61309	0.99999	13475	1	0.0069848	0.0182	0.942634	423	3
RBPJ	3	0.8753	0.87554	0.99999	19163	0	0.0069981	0.018232	0.942634	424	2
PSMC2	3	0.99296	0.99305	0.99999	21851	0	0.0070368	0.018332	0.942634	425	3
ZHX1	3	0.22553	0.35086	0.997908	7722	1	0.0070448	0.018357	0.942634	426	2
SCTR	3	0.042388	0.099314	0.976877	2206	1	0.0070488	0.018365	0.942634	427	2
PHF13	3	0.32789	0.46201	0.997908	10155	1	0.0071382	0.0186	0.942634	428	2
SPATA9	3	0.99285	0.99294	0.99999	21850	0	0.0071529	0.018641	0.942634	429	3
hsa-mir-371b;hsa-mir-371a	3	0.31572	0.4491	0.997908	9867	1	0.0071636	0.018674	0.942634	430	2
C19orf38	3	0.57896	0.64377	0.99999	14165	1	0.0071724	0.018702	0.942634	431	2
CST11	3	0.9217	0.92175	0.99999	20151	0	0.0071849	0.018741	0.942634	432	2
hsa-mir-7844	4	0.023659	0.058187	0.976877	1302	3	0.0072061	0.018789	0.942634	433	1
PODXL2	3	0.99279	0.99288	0.99999	21849	0	0.0072123	0.018804	0.942634	434	3
SLC5A6	3	0.96727	0.96736	0.99999	21233	0	0.0072213	0.018826	0.942634	435	3
ACOT9	3	0.99278	0.99287	0.99999	21848	0	0.0072228	0.018828	0.942634	436	3
KCNK17	3	0.26025	0.38891	0.997908	8515	2	0.0072316	0.01885	0.942634	437	1
hsa-mir-4437	4	0.24263	0.36964	0.997908	8114	1	0.0072373	0.018864	0.942634	438	2
E2F8	3	0.99275	0.99285	0.99999	21847	0	0.0072526	0.018905	0.942634	439	3
FANCC	3	0.99272	0.99282	0.99999	21846	0	0.0072773	0.018957	0.942634	440	3
PRDM2	3	0.82333	0.82454	0.99999	18047	0	0.007325	0.019086	0.942634	441	2
COQ10B	3	0.99266	0.99276	0.99999	21845	0	0.0073391	0.019115	0.942634	442	3
RNF103-CHMP3	3	0.99266	0.99276	0.99999	21844	0	0.0073427	0.019125	0.942634	443	3
NonTargetingControlGuideForHuman_0998	1	0.99266	0.99276	0.99999	21843	0	0.0073429	0.019125	0.942634	444	1
EXD1	3	0.70644	0.72718	0.99999	15957	1	0.0073688	0.019184	0.942634	445	2
CEACAM1	3	0.99263	0.99273	0.99999	21842	0	0.0073711	0.01919	0.942634	446	3
TRABD2B	3	0.19498	0.31589	0.997217	6974	2	0.0073717	0.019193	0.942634	447	1
FANCD2OS	3	0.99263	0.99273	0.99999	21841	0	0.0073728	0.019195	0.942634	448	3
WDR16	3	0.99262	0.99272	0.99999	21840	0	0.0073835	0.01922	0.942634	449	3
hsa-mir-6756	4	0.60763	0.66146	0.99999	14537	1	0.0074562	0.019416	0.947858	450	2
MID2	3	0.44596	0.5668	0.997981	12492	1	0.007465	0.019438	0.947858	451	1
hsa-mir-1469	4	0.9925	0.9926	0.99999	21839	0	0.0075005	0.019523	0.947858	452	4
DSG2	3	0.89256	0.89254	0.99999	19521	0	0.0075117	0.019547	0.947858	453	2
CLEC19A	3	0.66093	0.69547	0.99999	15284	1	0.0075132	0.019549	0.947858	454	2
FBXO21	3	0.99243	0.99253	0.99999	21838	0	0.0075701	0.019707	0.947858	455	3
hsa-mir-4646	4	0.85151	0.85198	0.99999	18675	1	0.0075794	0.019736	0.947858	456	1
SLC6A17	3	0.99241	0.99251	0.99999	21837	0	0.0075936	0.019772	0.947858	457	3
PML	3	0.9924	0.99251	0.99999	21836	0	0.0075954	0.019777	0.947858	458	3
PCDHGB6	2	0.9924	0.9925	0.99999	21835	0	0.0076039	0.019799	0.947858	459	2
SSBP3	3	0.27924	0.40964	0.997908	8997	1	0.0076051	0.0198	0.947858	460	2
CGRRF1	3	0.5454	0.62332	0.99999	13710	1	0.0076518	0.019925	0.951751	461	2
SLITRK1	3	0.3453	0.48086	0.997908	10577	1	0.0076985	0.02005	0.951852	462	2
TMED7-TICAM2;TICAM2	2	0.99226	0.99237	0.99999	21833	0	0.0077354	0.020143	0.951852	463	2
SNTA1	3	0.99226	0.99236	0.99999	21832	0	0.0077414	0.020162	0.951852	464	3
SCAF4	3	0.81982	0.82118	0.99999	17967	1	0.0077451	0.020173	0.951852	465	1
BID	3	0.99221	0.99232	0.99999	21831	0	0.0077856	0.020272	0.951852	466	3
MRAP	3	0.82231	0.82357	0.99999	18024	1	0.0077918	0.02029	0.951852	467	2
hsa-mir-3161	4	0.55195	0.62717	0.99999	13795	2	0.0078281	0.02039	0.951852	468	2
CFH	3	0.085177	0.18298	0.976877	4118	2	0.0078385	0.020417	0.951852	469	1
CD46	3	0.99216	0.99226	0.99999	21830	0	0.0078447	0.020436	0.951852	470	3
hsa-mir-4742	4	0.98593	0.98605	0.99999	21697	0	0.0078581	0.020471	0.951852	471	4
NRK	3	0.99213	0.99224	0.99999	21829	0	0.0078651	0.02049	0.951852	472	3
NonTargetingControlGuideForHuman_0397	1	0.99213	0.99223	0.99999	21828	0	0.0078747	0.020511	0.951852	473	1
BCL2L15	3	0.80565	0.80764	0.99999	17682	1	0.0078852	0.020539	0.951852	474	2
BCL2	3	0.12723	0.23492	0.991184	5213	1	0.0078942	0.020563	0.951852	475	2
BEST1	3	0.99208	0.99218	0.99999	21827	0	0.0079209	0.020631	0.951852	476	3
hsa-mir-378i	4	0.566	0.6358	0.99999	13990	1	0.0079291	0.020655	0.951852	477	2
ZNF835	3	0.39955	0.53807	0.997981	11834	2	0.0079318	0.020661	0.951852	478	1
NUAK1	3	0.89791	0.89784	0.99999	19638	0	0.0080013	0.020841	0.957977	479	2
OR6T1	3	0.33835	0.47328	0.997908	10414	1	0.0080252	0.020887	0.957977	480	2
THSD1	3	0.82526	0.82645	0.99999	18091	0	0.0080387	0.020925	0.957977	481	2
CCDC85A	3	0.81968	0.82105	0.99999	17964	1	0.0080718	0.02101	0.959427	482	2
NonTargetingControlGuideForHuman_0824	1	0.99191	0.99201	0.99999	21826	0	0.0080937	0.021065	0.959427	483	1
ZBTB40	3	0.15252	0.26555	0.992833	5884	1	0.0081185	0.02112	0.959427	484	2
ARPC1B	3	0.80507	0.80709	0.99999	17674	1	0.0081652	0.021245	0.959427	485	1
TXNDC5	3	0.125	0.23218	0.991184	5154	1	0.0082118	0.02136	0.959427	486	2
NXF3	3	0.92413	0.92419	0.99999	20206	0	0.0082585	0.021461	0.959427	487	2
hsa-mir-512-2;hsa-mir-512-1	4	0.018297	0.045777	0.963384	1045	2	0.0082697	0.02149	0.959427	488	2
PALM3	3	0.99171	0.99183	0.99999	21825	0	0.0082881	0.021541	0.959427	489	3
SLC25A32	3	0.9917	0.99182	0.99999	21824	0	0.0082958	0.021557	0.959427	490	3
ONECUT1	3	0.92494	0.92503	0.99999	20227	0	0.0083052	0.021582	0.959427	491	2
PRR7	3	0.99168	0.9918	0.99999	21823	0	0.008315	0.021603	0.959427	492	3
IL12B	3	0.99166	0.99178	0.99999	21822	0	0.0083382	0.021664	0.959427	493	3
DPY19L4	3	0.99166	0.99178	0.99999	21821	0	0.008342	0.021672	0.959427	494	3
GBP3	3	0.9682	0.96834	0.99999	21272	0	0.008346	0.02168	0.959427	495	3
THBS1	3	0.89416	0.89415	0.99999	19559	0	0.0083518	0.021693	0.959427	496	1
CCDC159	3	0.99161	0.99173	0.99999	21820	0	0.0083904	0.021786	0.959427	497	3
AHCTF1	3	0.34781	0.48351	0.997908	10634	1	0.0083985	0.021806	0.959427	498	2
EIF3H	3	0.6765	0.70611	0.99999	15517	1	0.0084225	0.021866	0.959427	499	2
DLGAP1	3	0.99156	0.99168	0.99999	21819	0	0.0084369	0.021893	0.959427	500	3
hsa-mir-4735	4	0.8968	0.89675	0.99999	19616	1	0.0084499	0.021924	0.959427	501	3
TRIM49C;TRIM49B;TRIM49	2	0.99151	0.99163	0.99999	21818	0	0.0084902	0.022038	0.959427	502	2
LHX4	3	0.41571	0.55074	0.997981	12121	1	0.0084918	0.02204	0.959427	503	2
SGTA	3	0.99147	0.99158	0.99999	21817	0	0.0085267	0.022122	0.959427	504	3
PTTG2	3	0.31506	0.44839	0.997908	9850	1	0.0085384	0.022147	0.959427	505	2
C6orf15	3	0.12113	0.2275	0.991184	5049	1	0.0085523	0.022177	0.959427	506	2
BCKDHA	3	0.97559	0.97584	0.99999	21459	0	0.0085716	0.022227	0.959427	507	3
IRX4	3	0.9844	0.98451	0.99999	21664	0	0.00862	0.022358	0.959427	508	3
APOM	3	0.8563	0.85667	0.99999	18757	0	0.0086317	0.022389	0.959427	509	2
TOMM22	3	0.99135	0.99145	0.99999	21816	0	0.0086507	0.022439	0.959427	510	3
hsa-mir-520h;hsa-mir-520g;hsa-mir-519b;hsa-mir-518d	2	0.99132	0.99142	0.99999	21815	0	0.0086757	0.022498	0.959427	511	2
CD52	3	0.48287	0.58722	0.999125	12938	1	0.0086784	0.022503	0.959427	512	2
FBXO42	3	0.99131	0.99141	0.99999	21814	0	0.0086923	0.022544	0.959427	513	3
CNBP	3	0.8237	0.82492	0.99999	18059	0	0.0087026	0.022573	0.959427	514	2
CDKN2A	3	0.88608	0.88606	0.99999	19374	0	0.0087123	0.022595	0.959427	515	2
hsa-mir-103b-1;hsa-mir-103a-1	3	0.33553	0.47023	0.997908	10341	2	0.0087717	0.022749	0.959427	516	1
HIVEP3	3	0.75665	0.76545	0.99999	16795	1	0.0088148	0.02286	0.959427	517	2
BTBD7	3	0.89106	0.89104	0.99999	19482	0	0.0088183	0.022869	0.959427	518	1
CDK8	3	0.22319	0.3482	0.997908	7672	2	0.008865	0.022981	0.959427	519	1
FMNL2	3	0.64701	0.68624	0.99999	15086	1	0.0089116	0.023094	0.959427	520	2
IL17RA	3	0.92264	0.9227	0.99999	20177	0	0.0089278	0.023133	0.959427	521	2
CRISP1	3	0.99105	0.99116	0.99999	21813	0	0.0089466	0.023181	0.959427	522	3
CLEC1B	3	0.99105	0.99116	0.99999	21812	0	0.0089486	0.023189	0.959427	523	3
MED10	3	0.79391	0.79703	0.99999	17446	1	0.0089582	0.023219	0.959427	524	2
ATF7IP2	3	0.32861	0.46276	0.997908	10165	1	0.0089821	0.023277	0.959427	525	2
SLC2A4RG	3	0.99102	0.99112	0.99999	21811	0	0.0089831	0.023279	0.959427	526	3
LRRC46	3	0.35407	0.49023	0.997908	10786	1	0.0090049	0.023348	0.959427	527	2
CEP104	3	0.97989	0.98005	0.99999	21563	0	0.0090167	0.023378	0.959427	528	3
BMPR2	3	0.67515	0.70519	0.99999	15502	1	0.0090316	0.023415	0.959427	529	2
hsa-mir-3616	4	0.13241	0.24121	0.991965	5351	1	0.0090469	0.023449	0.959427	530	3
XKR8	3	0.61974	0.66889	0.99999	14707	1	0.0090515	0.023457	0.959427	531	2
hsa-mir-3973	4	0.48448	0.5881	0.999125	12956	2	0.0091299	0.023641	0.959427	532	2
SLC22A3	3	0.86845	0.86878	0.99999	19002	0	0.0091448	0.023676	0.959427	533	2
EPHA4	3	0.17369	0.29075	0.995468	6403	1	0.0091459	0.023678	0.959427	534	2
CD248	3	0.98721	0.98732	0.99999	21719	0	0.0091914	0.023786	0.959427	535	3
FANK1	3	0.96593	0.96602	0.99999	21197	0	0.0092008	0.023806	0.959427	536	3
ARHGEF25	3	0.5462	0.6238	0.99999	13719	1	0.0092381	0.023895	0.959427	537	2
SSPN	3	0.99074	0.99085	0.99999	21810	0	0.0092616	0.023951	0.959427	538	3
CCDC140	3	0.99072	0.99084	0.99999	21809	0	0.0092823	0.024008	0.959427	539	3
KRTAP9-4	3	0.40392	0.54271	0.997981	11945	1	0.0092847	0.024013	0.959427	540	1
ACTL9	3	0.38457	0.52228	0.997981	11505	1	0.0092909	0.024025	0.959427	541	2
MAGEA2B;MAGEA2	2	0.9907	0.99082	0.99999	21808	0	0.0093044	0.024052	0.959427	542	2
DKK4	3	0.99068	0.99079	0.99999	21807	0	0.0093218	0.024104	0.959427	543	3
PSTPIP1	3	0.87222	0.87254	0.99999	19091	0	0.0093261	0.024114	0.959427	544	2
GLDC	3	0.99066	0.99078	0.99999	21806	0	0.0093363	0.024146	0.959427	545	3
SNRPD2	3	0.57231	0.63968	0.99999	14081	1	0.0093779	0.024243	0.959427	546	2
KRT81	3	0.99062	0.99074	0.99999	21805	0	0.0093801	0.024248	0.959427	547	3
MEGF10	3	0.98599	0.98611	0.99999	21699	0	0.0094068	0.024316	0.959427	548	3
MAGEA9B	1	0.99059	0.99071	0.99999	21804	0	0.0094074	0.024319	0.959427	549	1
GCSH	3	0.87132	0.87164	0.99999	19065	0	0.0094118	0.024328	0.959427	550	2
hsa-mir-891a	4	0.99058	0.99069	0.99999	21803	0	0.00942	0.024354	0.959427	551	4
TRPM5	3	0.22533	0.35061	0.997908	7714	1	0.0094246	0.024373	0.959427	552	1
HPS6	3	0.99057	0.99068	0.99999	21802	0	0.0094345	0.024396	0.959427	553	3
NGF	3	0.99051	0.99063	0.99999	21801	0	0.0094911	0.024534	0.959427	554	3
CARD17	3	0.9905	0.99063	0.99999	21800	0	0.0094953	0.024544	0.959427	555	3
SLC38A1	3	0.99049	0.99061	0.99999	21799	0	0.0095122	0.024583	0.959427	556	3
KIAA1328	3	0.8242	0.82543	0.99999	18072	0	0.0095178	0.024596	0.959427	557	2
TESK1	3	0.99048	0.9906	0.99999	21798	0	0.0095248	0.02461	0.959427	558	3
RAC3	3	0.99047	0.99059	0.99999	21797	0	0.0095333	0.024632	0.959427	559	3
R3HDM2	3	0.99039	0.99051	0.99999	21796	0	0.0096052	0.02481	0.959427	560	3
SEMA3A	3	0.49194	0.59226	0.99999	13040	1	0.009611	0.024827	0.959427	561	2
SDF2L1	3	0.99035	0.99046	0.99999	21795	0	0.0096519	0.024935	0.959427	562	3
CKLF-CMTM1	3	0.99028	0.99038	0.99999	21794	0	0.0097244	0.025119	0.959427	563	3
SLC22A16	3	0.99027	0.99038	0.99999	21793	0	0.0097287	0.025124	0.959427	564	3
CDKN2AIPNL	3	0.1964	0.31751	0.997217	6999	1	0.009743	0.02516	0.959427	565	2
GNA14	3	0.70677	0.72744	0.99999	15963	1	0.0097509	0.025181	0.959427	566	1
DCAF12	3	0.99023	0.99034	0.99999	21792	0	0.0097736	0.025234	0.959427	567	3
AXL	3	0.94453	0.94459	0.99999	20656	0	0.0097739	0.025234	0.959427	568	2
KRTAP4-2	3	0.99016	0.99028	0.99999	21791	0	0.0098381	0.025379	0.959427	569	3
hsa-mir-504	4	0.99009	0.99022	0.99999	21790	0	0.0099058	0.025544	0.959427	570	4
BLOC1S3	3	0.053901	0.1229	0.976877	2727	2	0.0099373	0.025618	0.959427	571	1
BPY2C;BPY2B;BPY2	2	0.99006	0.99018	0.99999	21789	0	0.0099425	0.025631	0.959427	572	2
RGL2	3	0.99005	0.99018	0.99999	21788	0	0.0099484	0.025645	0.959427	573	3
MFSD8	3	0.37186	0.50892	0.997908	11223	1	0.0099839	0.02573	0.959427	574	1
UBAC2	3	0.39775	0.53617	0.997981	11793	1	0.010007	0.025796	0.959427	575	2
PIK3AP1	3	0.98999	0.99011	0.99999	21787	0	0.010014	0.025811	0.959427	576	3
PHOX2A	3	0.63555	0.67884	0.99999	14918	1	0.010031	0.025858	0.959427	577	2
PHKA1	3	0.98997	0.99009	0.99999	21786	0	0.010033	0.025865	0.959427	578	3
hsa-mir-30d	4	0.10423	0.2067	0.984919	4618	2	0.010065	0.02595	0.959427	579	1
EEF2	3	0.15571	0.26933	0.993192	5971	2	0.010077	0.025983	0.959427	580	1
MMAB	3	0.98991	0.99004	0.99999	21785	0	0.010088	0.026008	0.959427	581	3
RASA4B	2	0.20099	0.32279	0.997217	7110	1	0.010093	0.026019	0.959427	582	1
hsa-mir-6739	4	0.84453	0.84513	0.99999	18518	1	0.010132	0.026097	0.959427	583	2
SPI1	3	0.9816	0.98175	0.99999	21595	0	0.01017	0.02618	0.959427	584	3
hsa-mir-520f	4	0.98979	0.98991	0.99999	21783	0	0.01021	0.026272	0.959427	585	4
PARP8	3	0.98975	0.98987	0.99999	21781	0	0.010253	0.02637	0.959427	586	3
IDH3B	3	0.64879	0.68742	0.99999	15116	1	0.010264	0.026396	0.959427	587	2
CCT5	3	0.8816	0.88163	0.99999	19287	0	0.01029	0.026457	0.959427	588	2
EME2	3	0.9897	0.98983	0.99999	21780	0	0.0103	0.026483	0.959427	589	3
LIN37	3	0.51001	0.60264	0.99999	13256	1	0.01031	0.026514	0.959427	590	2
LYVE1	3	0.88973	0.88972	0.99999	19446	0	0.010311	0.026518	0.959427	591	2
LRRC66	3	0.98966	0.9898	0.99999	21779	0	0.010342	0.026592	0.959427	592	3
RNF10	3	0.98965	0.98978	0.99999	21778	0	0.010351	0.026612	0.959427	593	3
PEX26	3	0.84543	0.84603	0.99999	18539	0	0.010357	0.026629	0.959427	594	2
SP6	3	0.98963	0.98977	0.99999	21777	0	0.010366	0.026653	0.959427	595	3
PNKD	3	0.98963	0.98977	0.99999	21776	0	0.010369	0.026658	0.959427	596	3
SEMA4A	3	0.97674	0.97698	0.99999	21490	0	0.010369	0.026658	0.959427	597	3
hsa-mir-3689c;hsa-mir-3689c;hsa-mir-3689a	1	0.98962	0.98976	0.99999	21774	0	0.010377	0.026682	0.959427	598	1
MFAP2	3	0.18684	0.30632	0.995468	6770	2	0.010403	0.026738	0.959427	599	1
RAB1A	3	0.98958	0.98972	0.99999	21773	0	0.010422	0.026786	0.959427	600	3
SCP2D1	3	0.43986	0.56347	0.997981	12407	1	0.01045	0.026852	0.959427	601	2
GPBAR1	3	0.98954	0.98967	0.99999	21772	0	0.010463	0.026887	0.959427	602	3
SORCS1	3	0.94533	0.9454	0.99999	20675	0	0.010464	0.026892	0.959427	603	2
ITM2B	3	0.98953	0.98967	0.99999	21771	0	0.010472	0.026909	0.959427	604	3
PRODH2	3	0.97067	0.97082	0.99999	21336	0	0.010486	0.026935	0.959427	605	3
hsa-mir-1238	4	0.95003	0.95015	0.99999	20786	0	0.010526	0.027043	0.959427	606	3
GYG1	3	0.98947	0.98961	0.99999	21770	0	0.010526	0.027043	0.959427	607	3
CSF1R	3	0.98383	0.98397	0.99999	21643	0	0.010544	0.02709	0.959427	608	3
MFSD12	3	0.91369	0.91379	0.99999	19978	0	0.010592	0.027191	0.959427	609	2
NonTargetingControlGuideForHuman_0599	1	0.9894	0.98953	0.99999	21769	0	0.010596	0.027199	0.959427	610	1
ZBTB7C	3	0.9894	0.98953	0.99999	21768	0	0.010598	0.027202	0.959427	611	3
NFYB	3	0.86906	0.86939	0.99999	19014	0	0.010636	0.027285	0.959427	612	1
IFT80	3	0.98934	0.98946	0.99999	21767	0	0.010661	0.027344	0.959427	613	3
HCN4	3	0.21492	0.33882	0.997908	7458	2	0.010683	0.027399	0.959427	614	1
hsa-mir-4490	4	0.9893	0.98943	0.99999	21766	0	0.010699	0.027443	0.959427	615	4
hsa-mir-5572	4	0.97338	0.97357	0.99999	21411	0	0.010702	0.027451	0.959427	616	3
BTN3A3	3	0.48266	0.5871	0.999125	12935	1	0.010729	0.027521	0.959427	617	2
H2BFWT	3	0.87043	0.87076	0.99999	19043	0	0.010743	0.027547	0.959427	618	2
SLC38A9	3	0.67011	0.70166	0.99999	15420	1	0.010776	0.02763	0.959427	619	1
NOXA1	3	0.80977	0.81156	0.99999	17756	1	0.010796	0.027673	0.959427	620	2
FBXL14	3	0.97457	0.9748	0.99999	21435	0	0.010823	0.027747	0.959427	621	3
SESN1	3	0.45365	0.57104	0.997981	12594	1	0.010834	0.027775	0.959427	622	2
CACNG8	3	0.075103	0.16458	0.976877	3667	1	0.010869	0.02785	0.959427	623	1
LYSMD2	3	0.37708	0.51439	0.997908	11346	2	0.010916	0.02796	0.959427	624	1
VRK2	3	0.8575	0.85788	0.99999	18777	0	0.010962	0.028085	0.959427	625	2
MRRF	3	0.047003	0.109	0.976877	2412	2	0.011009	0.028194	0.959427	626	1
MCM4	3	0.98899	0.98911	0.99999	21765	0	0.011011	0.028197	0.959427	627	3
KLK15	3	0.49751	0.59544	0.99999	13101	1	0.01103	0.028242	0.959427	628	2
SNX4	3	0.98895	0.98907	0.99999	21764	0	0.01105	0.028293	0.959427	629	3
GRN	3	0.98895	0.98907	0.99999	21763	0	0.011053	0.028298	0.959427	630	3
GIMAP4	3	0.98894	0.98906	0.99999	21762	0	0.011062	0.028324	0.959427	631	3
CD276	3	0.98893	0.98905	0.99999	21761	0	0.011071	0.028351	0.959427	632	3
TMOD2	3	0.45693	0.57282	0.997981	12635	1	0.011133	0.028513	0.959427	633	2
KCNE2	3	0.63521	0.6786	0.99999	14914	1	0.011149	0.028551	0.959427	634	1
OR10J5	3	0.3401	0.47518	0.997908	10455	2	0.011195	0.028668	0.959427	635	1
OR2AG1	3	0.98879	0.98892	0.99999	21760	0	0.011207	0.028701	0.959427	636	3
NonTargetingControlGuideForHuman_0832	1	0.98872	0.98884	0.99999	21758	0	0.011284	0.028875	0.959427	637	1
RHCE	3	0.92446	0.92455	0.99999	20213	0	0.011288	0.028889	0.959427	638	2
SLC6A19	3	0.60472	0.6597	0.99999	14505	1	0.011298	0.028915	0.959427	639	2
KIAA0922	3	0.97109	0.97124	0.99999	21345	0	0.011304	0.028929	0.959427	640	3
DCAF17	3	0.13202	0.24074	0.991965	5340	1	0.011309	0.028946	0.959427	641	2
GOLGA6D;GOLGA6C	2	0.98867	0.98879	0.99999	21757	0	0.011329	0.028998	0.959427	642	2
TMEM120B	3	0.4575	0.57314	0.997981	12642	1	0.011331	0.029006	0.959427	643	2
PI4KB	3	0.98867	0.98879	0.99999	21756	0	0.011334	0.029013	0.959427	644	3
SAMD4B	3	0.74967	0.75992	0.99999	16664	1	0.011335	0.029013	0.959427	645	1
RFPL2	3	0.98866	0.98878	0.99999	21755	0	0.011344	0.029035	0.959427	646	3
USP47	3	0.98863	0.98875	0.99999	21754	0	0.011367	0.02909	0.959427	647	3
WDR60	3	0.9886	0.98872	0.99999	21753	0	0.011398	0.029162	0.959427	648	3
NPTX2	3	0.019183	0.047839	0.971062	1082	2	0.011428	0.029232	0.959427	649	1
hsa-mir-496	4	0.14638	0.25812	0.992833	5715	2	0.01143	0.029244	0.959427	650	2
CDC123	3	0.43144	0.55903	0.997981	12298	1	0.011475	0.029359	0.959427	651	2
PDE5A	3	0.50852	0.60179	0.99999	13242	1	0.011498	0.029412	0.959427	652	2
ADAMTS12	3	0.98848	0.98861	0.99999	21752	0	0.011515	0.029453	0.959427	653	3
OR2M3	3	0.26733	0.39661	0.997908	8698	1	0.011521	0.029466	0.959427	654	1
CPSF3L	3	0.78602	0.78999	0.99999	17298	1	0.011564	0.02958	0.959427	655	2
NUDT10	3	0.96796	0.96808	0.99999	21261	0	0.011568	0.029588	0.959427	656	3
ALS2CL	3	0.98843	0.98855	0.99999	21751	0	0.011573	0.029602	0.959427	657	3
NPTN	3	0.45123	0.56968	0.997981	12565	1	0.011614	0.029714	0.959427	658	2
hsa-mir-2114	4	0.013104	0.033343	0.961145	746	1	0.011616	0.029721	0.959427	659	3
ZNF486	3	0.98838	0.9885	0.99999	21750	0	0.011618	0.029723	0.959427	660	3
TMEM33	3	0.98838	0.9885	0.99999	21749	0	0.011621	0.029732	0.959427	661	3
FDCSP	3	0.98837	0.9885	0.99999	21748	0	0.011626	0.029748	0.959427	662	3
SFTPA1	3	0.71668	0.73478	0.99999	16109	1	0.011648	0.029805	0.959427	663	2
COLEC10	3	0.27546	0.40555	0.997908	8900	2	0.011661	0.029834	0.959427	664	1
LPXN	3	0.36672	0.50355	0.997908	11102	1	0.011687	0.029905	0.959427	665	2
ADAM23	3	0.50459	0.59951	0.99999	13186	1	0.01171	0.029957	0.959427	666	2
MSH2	3	0.98825	0.98837	0.99999	21747	0	0.011749	0.030047	0.959427	667	3
VIP	3	0.9882	0.98833	0.99999	21746	0	0.011797	0.030168	0.959427	668	3
CTSO	3	0.19146	0.31176	0.995468	6887	2	0.011801	0.030178	0.959427	669	1
NHLH2	3	0.81494	0.81643	0.99999	17863	1	0.011847	0.030289	0.959427	670	2
CLEC7A	3	0.9881	0.98822	0.99999	21745	0	0.011902	0.030419	0.959427	671	3
HADH	3	0.88607	0.88605	0.99999	19373	0	0.01194	0.030509	0.959427	672	2
CYC1	3	0.98802	0.98816	0.99999	21744	0	0.011976	0.030594	0.959427	673	3
C14orf132	3	0.6685	0.70059	0.99999	15394	1	0.011987	0.030623	0.959427	674	1
CCDC107	3	0.12337	0.23024	0.991184	5105	1	0.011992	0.030638	0.959427	675	2
GOT1L1	3	0.988	0.98814	0.99999	21743	0	0.011998	0.030654	0.959427	676	3
TP73	3	0.98798	0.98812	0.99999	21742	0	0.012015	0.030693	0.959427	677	3
ITGA11	3	0.96269	0.96279	0.99999	21102	0	0.01208	0.030834	0.959427	678	3
MLKL	3	0.42701	0.55672	0.997981	12248	1	0.012083	0.030843	0.959427	679	2
FBXO44	3	0.9879	0.98803	0.99999	21741	0	0.012096	0.030878	0.959427	680	3
TCEB3B	3	0.98788	0.988	0.99999	21740	0	0.012124	0.030942	0.959427	681	3
GGCX	3	0.30762	0.44038	0.997908	9676	2	0.012126	0.030948	0.959427	682	1
TLN2	3	0.98783	0.98796	0.99999	21739	0	0.012168	0.031046	0.959427	683	3
ABHD13	3	0.95566	0.95583	0.99999	20904	0	0.012173	0.031057	0.959427	684	3
LAMC1	3	0.98783	0.98795	0.99999	21738	0	0.012173	0.03106	0.959427	685	3
SF3B5	3	0.8978	0.89774	0.99999	19634	0	0.012174	0.031061	0.959427	686	2
ACRV1	3	0.98782	0.98795	0.99999	21737	0	0.012183	0.031089	0.959427	687	3
MOS	3	0.15367	0.26689	0.992833	5919	2	0.012219	0.031172	0.959427	688	1
TGFB1	3	0.9822	0.98236	0.99999	21608	0	0.012226	0.031185	0.959427	689	3
AGFG2	3	0.98776	0.98788	0.99999	21736	0	0.01224	0.03122	0.959427	690	3
GGT7	3	0.50097	0.59743	0.99999	13152	1	0.012254	0.031248	0.959427	691	2
P2RX5	3	0.27292	0.40277	0.997908	8833	1	0.012266	0.031276	0.959427	692	2
MYO1C	3	0.92406	0.92412	0.99999	20204	0	0.0123	0.031351	0.959427	693	2
ENOX1	3	0.25577	0.38404	0.997908	8413	2	0.012312	0.031384	0.959427	694	1
EMP1	3	0.98768	0.9878	0.99999	21735	0	0.01232	0.0314	0.959427	695	3
RMI2	3	0.15084	0.26353	0.992833	5833	1	0.012358	0.031496	0.959427	696	2
KMT2B	3	0.64509	0.68503	0.99999	15055	1	0.012359	0.031499	0.959427	697	2
AQP1	3	0.92846	0.92856	0.99999	20301	0	0.012363	0.031507	0.959427	698	2
C9orf24	3	0.9876	0.98771	0.99999	21734	0	0.012403	0.031612	0.959427	699	3
RLN2	3	0.24187	0.36881	0.997908	8093	1	0.012406	0.031615	0.959427	700	2
hsa-mir-4693	2	0.7854	0.78943	0.99999	17285	0	0.012426	0.031671	0.959427	701	1
CHN2	3	0.12877	0.23675	0.991501	5254	1	0.012438	0.031703	0.959427	702	2
AK1	3	0.98756	0.98767	0.99999	21733	0	0.012443	0.031715	0.959427	703	3
PRELID2	3	0.52124	0.60917	0.99999	13392	1	0.012452	0.031732	0.959427	704	2
SNAI2	3	0.98751	0.98763	0.99999	21732	0	0.012494	0.031839	0.959427	705	3
PLAGL2	3	0.89103	0.89101	0.99999	19481	0	0.012499	0.031851	0.959427	706	2
MAP3K4	3	0.98746	0.98758	0.99999	21731	0	0.012537	0.031939	0.959427	707	3
TEX2	3	0.98746	0.98758	0.99999	21730	0	0.012542	0.03195	0.959427	708	3
ZNF134	3	0.12478	0.23193	0.991184	5148	2	0.012545	0.031955	0.959427	709	1
FAM69A	3	0.98742	0.98754	0.99999	21729	0	0.012577	0.032025	0.959427	710	3
ADAM12	3	0.98742	0.98754	0.99999	21728	0	0.01258	0.032032	0.959427	711	3
STK38L	3	0.39705	0.5354	0.997981	11778	1	0.012595	0.032069	0.959427	712	2
ZNF524	3	0.88554	0.88555	0.99999	19363	0	0.012629	0.032161	0.959427	713	2
ZCCHC13	3	0.36029	0.49679	0.997908	10950	1	0.012638	0.032181	0.959427	714	2
ZDHHC13	3	0.98736	0.98747	0.99999	21727	0	0.012638	0.032182	0.959427	715	3
ZBTB8B	3	0.98736	0.98747	0.99999	21726	0	0.012644	0.032195	0.959427	716	3
CD34	3	0.98735	0.98746	0.99999	21725	0	0.012649	0.032207	0.959427	717	3
DUSP13	3	0.96041	0.96053	0.99999	21025	0	0.012659	0.032223	0.959427	718	3
NLRC4	3	0.75506	0.76418	0.99999	16766	1	0.012685	0.032291	0.959427	719	1
ZNF546	3	0.98728	0.98739	0.99999	21724	0	0.012718	0.032376	0.959427	720	3
hsa-mir-6128	4	0.29669	0.42869	0.997908	9413	2	0.012732	0.032409	0.959427	721	1
ZMAT1	3	0.98726	0.98738	0.99999	21723	0	0.012735	0.032418	0.959427	722	3
IL4I1	3	0.98723	0.98734	0.99999	21722	0	0.012769	0.032508	0.959427	723	3
SEMA6D	3	0.51272	0.6042	0.99999	13287	1	0.012778	0.032531	0.959427	724	1
PPM1H	3	0.98722	0.98733	0.99999	21721	0	0.012784	0.032547	0.959427	725	3
CST9L	3	0.98721	0.98732	0.99999	21720	0	0.012792	0.032565	0.959427	726	3
CHGB	3	0.98718	0.9873	0.99999	21718	0	0.012817	0.03262	0.959427	727	3
KRT85	3	0.39892	0.53743	0.997981	11818	2	0.012824	0.03264	0.959427	728	1
hsa-mir-8062	4	0.92123	0.92126	0.99999	20141	0	0.012856	0.032713	0.959427	729	3
COL6A3	3	0.14924	0.26161	0.992833	5798	1	0.012871	0.032743	0.959427	730	2
OR7G1	3	0.61056	0.66326	0.99999	14579	1	0.012881	0.032762	0.959427	731	2
PARD6A	3	0.59352	0.65286	0.99999	14360	1	0.012917	0.032852	0.959427	732	2
hsa-mir-3618	4	0.98708	0.9872	0.99999	21717	0	0.012922	0.032864	0.959427	733	4
PEX14	3	0.43378	0.56025	0.997981	12333	1	0.012939	0.032903	0.959427	734	2
TM9SF1	3	0.87258	0.87289	0.99999	19102	0	0.01301	0.033062	0.959427	735	2
C20orf141	3	0.98696	0.98708	0.99999	21716	0	0.01304	0.033128	0.959427	736	3
hsa-mir-6514	4	0.60555	0.6602	0.99999	14514	1	0.013042	0.033133	0.959427	737	3
EYS	3	0.74135	0.75345	0.99999	16508	1	0.013057	0.033172	0.959427	738	1
UBE2L3	3	0.98691	0.98704	0.99999	21715	0	0.013087	0.033236	0.959427	739	3
TRAF3IP3	3	0.44381	0.56564	0.997981	12456	1	0.013103	0.033279	0.959427	740	1
C20orf202	3	0.40445	0.54331	0.997981	11958	1	0.013134	0.033358	0.959427	741	2
CCDC81	3	0.9821	0.98225	0.99999	21605	0	0.013158	0.033416	0.959427	742	3
PAK6	3	0.98682	0.98694	0.99999	21714	0	0.013175	0.033459	0.959427	743	3
LAT	3	0.85063	0.85112	0.99999	18649	0	0.013176	0.033459	0.959427	744	2
GPR31	3	0.056089	0.12737	0.976877	2839	2	0.013196	0.033505	0.959427	745	1
FAS	3	0.90841	0.90846	0.99999	19856	0	0.013205	0.033522	0.959427	746	2
MAGEB16	3	0.88165	0.88167	0.99999	19288	0	0.013235	0.033599	0.959427	747	2
hsa-mir-5009	4	0.98676	0.98687	0.99999	21713	0	0.013237	0.033602	0.959427	748	4
OPLAH	3	0.83759	0.83839	0.99999	18364	0	0.013289	0.033726	0.959427	749	1
DOK5	3	0.98671	0.98681	0.99999	21712	0	0.013294	0.033737	0.959427	750	3
SUPT3H	3	0.55687	0.63015	0.99999	13862	1	0.013295	0.033742	0.959427	751	2
hsa-mir-3179-2;hsa-mir-3179-1	3	0.22303	0.34802	0.997908	7668	1	0.013307	0.033771	0.959427	752	2
SPATA31A7;SPATA31A5;SPATA31A3;SPATA31A2	1	0.98667	0.98677	0.99999	21711	0	0.013333	0.033835	0.959427	753	1
HIST1H2AD	3	0.74715	0.75796	0.99999	16618	1	0.013336	0.03384	0.959427	754	2
DST	3	0.92085	0.92089	0.99999	20133	0	0.013336	0.033841	0.959427	755	2
C8orf74	3	0.93949	0.93952	0.99999	20538	0	0.013366	0.033916	0.959427	756	2
AP3S2	3	0.36488	0.50162	0.997908	11056	1	0.013382	0.033957	0.959427	757	2
FOLH1	3	0.13201	0.24072	0.991965	5339	2	0.013429	0.034076	0.959427	758	1
AAK1	3	0.90398	0.90393	0.99999	19774	0	0.01345	0.034129	0.959427	759	2
CXorf61	3	0.98653	0.98664	0.99999	21710	0	0.013465	0.03417	0.959427	760	3
BLVRA	3	0.89148	0.89148	0.99999	19499	0	0.013475	0.03419	0.959427	761	1
RFT1	3	0.98651	0.98661	0.99999	21709	0	0.013492	0.03422	0.959427	762	3
ITIH2	3	0.9865	0.9866	0.99999	21708	0	0.013503	0.034245	0.959427	763	3
ITGA4	3	0.78768	0.79144	0.99999	17337	1	0.013522	0.034289	0.959427	764	2
hsa-mir-551b	4	0.37307	0.51021	0.997908	11253	1	0.013556	0.034376	0.959427	765	3
MAP1LC3C	3	0.98644	0.98654	0.99999	21707	0	0.013564	0.034395	0.959427	766	3
TYMP	3	0.83868	0.83947	0.99999	18389	0	0.013582	0.034438	0.959427	767	2
PRLR	3	0.47185	0.58112	0.998811	12806	1	0.013615	0.034514	0.959427	768	2
SLC5A10	3	0.69724	0.72059	0.99999	15815	1	0.013642	0.034574	0.959427	769	2
TSPY8;TSPY4;TSPY3;TSPY2;TSPY1	1	0.98635	0.98646	0.99999	21706	0	0.013646	0.034584	0.959427	770	1
CST3	3	0.91886	0.91887	0.99999	20080	0	0.013648	0.034591	0.959427	771	2
TES	3	0.93686	0.93691	0.99999	20481	0	0.013661	0.034629	0.959427	772	2
PRR13	3	0.5496	0.62579	0.99999	13762	1	0.013685	0.034686	0.959427	773	2
CDON	3	0.19964	0.32121	0.997217	7074	1	0.013697	0.034715	0.959427	774	2
JRK	3	0.9863	0.9864	0.99999	21705	0	0.013703	0.034734	0.959427	775	3
C17orf53	3	0.81064	0.81235	0.99999	17775	1	0.013708	0.034747	0.959427	776	2
TMEM189-UBE2V1;TMEM189	3	0.33488	0.46953	0.997908	10323	1	0.013709	0.03475	0.959427	777	2
RDH16	3	0.98627	0.98637	0.99999	21704	0	0.013733	0.034824	0.959427	778	3
hsa-mir-548a-3	4	0.75618	0.76508	0.99999	16787	1	0.013751	0.034859	0.959427	779	3
CCNB2	3	0.53556	0.61749	0.99999	13582	1	0.013754	0.034869	0.959427	780	2
SIPA1L3	3	0.020877	0.051788	0.976877	1166	2	0.013801	0.034979	0.959427	781	1
TMEM215	3	0.33395	0.46854	0.997908	10291	1	0.013847	0.035085	0.959427	782	1
OTUB1	3	0.84074	0.84141	0.99999	18428	0	0.013848	0.035086	0.959427	783	2
hsa-mir-628	4	0.98613	0.98625	0.99999	21703	0	0.01387	0.035141	0.959427	784	4
PLEKHG1	3	0.90145	0.9014	0.99999	19725	0	0.013872	0.035146	0.959427	785	2
hsa-mir-548at	4	0.96273	0.96283	0.99999	21103	0	0.013892	0.035193	0.959427	786	3
DCAF15	3	0.6723	0.70323	0.99999	15457	1	0.013897	0.035207	0.959427	787	2
hsa-mir-1279	2	0.96289	0.96298	0.99999	21106	0	0.013918	0.035262	0.959427	788	2
RAD51	3	0.98607	0.98619	0.99999	21702	0	0.013927	0.035285	0.959427	789	3
CASP1	3	0.42455	0.5554	0.997981	12219	1	0.01394	0.035316	0.959427	790	1
LMO2	3	0.98602	0.98614	0.99999	21701	0	0.013979	0.03541	0.959427	791	3
CREBL2	3	0.98601	0.98613	0.99999	21700	0	0.013987	0.03543	0.959427	792	3
hsa-mir-562	4	0.32449	0.45839	0.997908	10066	2	0.014033	0.035546	0.959427	793	2
CLDN2	3	0.40146	0.54011	0.997981	11884	2	0.014033	0.035548	0.959427	794	1
SLC25A25	3	0.90616	0.90618	0.99999	19815	0	0.014049	0.035589	0.959427	795	2
GOT2	3	0.98593	0.98606	0.99999	21698	0	0.014066	0.035634	0.959427	796	3
ZNF83	3	0.94938	0.94951	0.99999	20763	0	0.014074	0.035649	0.959427	797	3
TAS2R19	3	0.9859	0.98603	0.99999	21696	0	0.014102	0.035718	0.959427	798	3
ZNF645	3	0.67956	0.70822	0.99999	15563	1	0.014126	0.035773	0.959427	799	2
SETDB2	3	0.82037	0.82171	0.99999	17982	1	0.014196	0.035947	0.959427	800	2
NAIF1	3	0.28218	0.41284	0.997908	9063	1	0.014219	0.036008	0.959427	801	2
VASH2	3	0.80012	0.80263	0.99999	17570	1	0.014252	0.036079	0.959427	802	2
TLN1	3	0.24487	0.37212	0.997908	8179	1	0.014266	0.036112	0.959427	803	1
FLJ27352;C15orf65	1	0.98573	0.98586	0.99999	21695	0	0.014271	0.036127	0.959427	804	1
PEA15	3	0.83752	0.83832	0.99999	18360	0	0.014301	0.036201	0.959427	805	2
INVS	3	0.98569	0.98583	0.99999	21694	0	0.014308	0.036219	0.959427	806	3
OR52H1	3	0.31202	0.44507	0.997908	9784	2	0.014312	0.036227	0.959427	807	1
hsa-mir-199a-2	3	0.98568	0.98581	0.99999	21693	0	0.014322	0.036251	0.959427	808	3
UGT1A9;UGT1A8;UGT1A7;UGT1A6;UGT1A5;UGT1A4;UGT1A3;UGT1A10;UGT1A1	2	0.98567	0.98581	0.99999	21692	0	0.014328	0.036267	0.959427	809	2
ZNF530	3	0.73462	0.74825	0.99999	16404	1	0.014359	0.036326	0.959427	810	2
OR2F2	3	0.98562	0.98576	0.99999	21691	0	0.01438	0.036379	0.959427	811	3
KHDC1L	3	0.9856	0.98574	0.99999	21690	0	0.014403	0.036433	0.959427	812	3
MXRA7	3	0.98559	0.98573	0.99999	21689	0	0.014405	0.03644	0.959427	813	3
hsa-mir-4460	4	0.98559	0.98573	0.99999	21688	0	0.014414	0.036465	0.959427	814	4
MBOAT2	3	0.9435	0.94353	0.99999	20636	0	0.014425	0.036487	0.959427	815	2
ZNF816-ZNF321P;ZNF816	1	0.98556	0.9857	0.99999	21687	0	0.014443	0.036536	0.959427	816	1
PAFAH1B3	3	0.36318	0.49981	0.997908	11021	1	0.014456	0.036564	0.959427	817	2
TMEM230	3	0.69942	0.72214	0.99999	15860	1	0.014468	0.036591	0.959427	818	2
GPR45	3	0.9855	0.98565	0.99999	21686	0	0.0145	0.036666	0.959427	819	3
FKBP2	3	0.90096	0.90092	0.99999	19711	0	0.014544	0.036773	0.959427	820	2
CRK	3	0.98539	0.98554	0.99999	21684	0	0.014612	0.036931	0.959427	821	3
hsa-mir-548ad	3	0.98537	0.98552	0.99999	21683	0	0.014629	0.036969	0.959427	822	3
ZNF441	3	0.90953	0.90962	0.99999	19883	0	0.014637	0.036988	0.959427	823	1
ATRAID	3	0.73798	0.75087	0.99999	16453	1	0.014684	0.037103	0.959427	824	2
MYH2	3	0.87526	0.8755	0.99999	19160	0	0.014686	0.037107	0.959427	825	2
CPPED1	3	0.9853	0.98545	0.99999	21682	0	0.014705	0.037152	0.959427	826	3
hsa-mir-1285-2	4	0.099536	0.20083	0.982315	4502	2	0.014713	0.037173	0.959427	827	1
TRIP12	3	0.42338	0.55481	0.997981	12209	1	0.014742	0.037246	0.959427	828	2
LAPTM4A	3	0.75478	0.76396	0.99999	16761	1	0.014777	0.037328	0.959427	829	1
GRIN2B	3	0.84629	0.84685	0.99999	18557	0	0.01478	0.037335	0.959427	830	2
PCDHAC2;PCDHAC1;PCDHA9;PCDHA8;PCDHA7;PCDHA6;PCDHA5;PCDHA4;PCDHA3;PCDHA2;PCDHA13;PCDHA12;PCDHA11;PCDHA10;PCDHA1	1	0.98521	0.98536	0.99999	21681	0	0.014788	0.037353	0.959427	831	1
PROM2	3	0.36686	0.50371	0.997908	11108	2	0.014823	0.037415	0.959427	832	1
TFAP2B	3	0.95983	0.95996	0.99999	21004	0	0.01483	0.037428	0.959427	833	3
hsa-mir-4798	4	0.70566	0.72664	0.99999	15944	1	0.014856	0.037491	0.959427	834	3
CXXC4	3	0.78535	0.78938	0.99999	17284	1	0.014861	0.037503	0.959427	835	2
OR4K13	3	0.98513	0.98529	0.99999	21680	0	0.014869	0.037518	0.959427	836	3
PRDM11	3	0.98512	0.98527	0.99999	21679	0	0.01488	0.037549	0.959427	837	3
PERP	3	0.98511	0.98526	0.99999	21678	0	0.014886	0.037563	0.959427	838	3
METTL7A	3	0.50377	0.59906	0.99999	13177	1	0.014916	0.037628	0.959427	839	1
ARHGDIA	3	0.98508	0.98522	0.99999	21677	0	0.01492	0.037638	0.959427	840	3
CCL4L2;CCL4L1	2	0.98506	0.9852	0.99999	21676	0	0.014945	0.037696	0.959427	841	2
FZD2	3	0.92622	0.9263	0.99999	20256	0	0.014981	0.037781	0.959427	842	2
CDY2B;CDY2A;CDY1B;CDY1	1	0.98501	0.98515	0.99999	21675	0	0.014991	0.037806	0.959427	843	1
ARL14EPL	3	0.26378	0.39285	0.997908	8611	1	0.015009	0.03784	0.959427	844	2
PPID	3	0.98497	0.98511	0.99999	21674	0	0.015028	0.037878	0.959427	845	3
GREB1	3	0.89652	0.89648	0.99999	19607	0	0.015031	0.037883	0.959427	846	2
GCDH	3	0.84327	0.84389	0.99999	18491	0	0.015055	0.037943	0.959427	847	1
UQCC1;UQCC	3	0.98493	0.98505	0.99999	21673	0	0.015074	0.037991	0.959427	848	3
FAM194A	3	0.75129	0.76122	0.99999	16694	1	0.015114	0.038081	0.959427	849	2
hsa-mir-921	4	0.53025	0.61439	0.99999	13509	2	0.015146	0.038157	0.959427	850	2
POMK	2	0.98485	0.98497	0.99999	21672	0	0.015148	0.038161	0.959427	851	2
LRRC55	3	0.40423	0.54306	0.997981	11952	2	0.015148	0.038161	0.959427	852	1
FAM175B	3	0.8326	0.83351	0.99999	18253	0	0.015152	0.038167	0.959427	853	2
GRAMD4	3	0.98483	0.98495	0.99999	21671	0	0.015171	0.038218	0.959427	854	3
NonTargetingControlGuideForHuman_0109	1	0.98479	0.98491	0.99999	21670	0	0.01521	0.038303	0.959427	855	1
MTRNR2L2	3	0.87234	0.87267	0.99999	19093	0	0.015228	0.038346	0.959427	856	2
MIP	3	0.66771	0.70006	0.99999	15385	1	0.015241	0.03838	0.959427	857	1
TBCEL	3	0.98472	0.98483	0.99999	21669	0	0.015278	0.038469	0.959427	858	3
CCM2	3	0.63553	0.67882	0.99999	14917	1	0.015291	0.038501	0.959427	859	2
PAK1	3	0.3094	0.44227	0.997908	9718	1	0.015334	0.038604	0.959427	860	1
ABCA13	3	0.90324	0.90322	0.99999	19759	0	0.015374	0.038697	0.959427	861	2
ZNF664-FAM101A;FAM101A	2	0.9695	0.96961	0.99999	21311	0	0.015377	0.038705	0.959427	862	2
CCDC40	3	0.82324	0.82444	0.99999	18045	0	0.015381	0.038717	0.959427	863	1
LONRF1	3	0.98461	0.98472	0.99999	21668	0	0.015391	0.03874	0.959427	864	3
LRRC16B	3	0.93005	0.93015	0.99999	20341	0	0.015413	0.038794	0.959427	865	2
ERC2	3	0.39279	0.53091	0.997981	11687	1	0.015427	0.038832	0.959427	866	1
EBP	3	0.98455	0.98465	0.99999	21667	0	0.015455	0.0389	0.959427	867	3
B9D1	3	0.11915	0.22504	0.990205	5002	1	0.015483	0.038969	0.959427	868	2
C6orf211	3	0.14168	0.25246	0.991965	5602	2	0.01552	0.039049	0.959427	869	1
INTS12	3	0.98448	0.98459	0.99999	21666	0	0.015525	0.039063	0.959427	870	3
SHROOM2	3	0.98447	0.98459	0.99999	21665	0	0.015528	0.039069	0.959427	871	3
NIPAL4	3	0.95419	0.95432	0.99999	20874	0	0.015566	0.039149	0.959427	872	3
ALPI	3	0.9844	0.98451	0.99999	21663	0	0.015604	0.039241	0.959427	873	3
AIFM3	3	0.93012	0.93022	0.99999	20343	0	0.015613	0.039265	0.959427	874	2
hsa-mir-193a	4	0.66255	0.69653	0.99999	15313	1	0.015641	0.039338	0.959427	875	3
BBC3	3	0.55246	0.62748	0.99999	13806	1	0.015659	0.039381	0.959427	876	2
STK39	3	0.98431	0.98443	0.99999	21661	0	0.015686	0.039439	0.959427	877	3
ASB1	3	0.9843	0.98441	0.99999	21660	0	0.015704	0.039484	0.959427	878	3
BPNT1	3	0.58238	0.64593	0.99999	14212	1	0.015706	0.039488	0.959427	879	2
ACOT8	3	0.98426	0.98438	0.99999	21659	0	0.015736	0.039554	0.959427	880	3
XPNPEP2	3	0.98426	0.98437	0.99999	21658	0	0.015739	0.039559	0.959427	881	3
KCNK10	3	0.086414	0.18453	0.977513	4156	1	0.015752	0.039587	0.959427	882	2
TECR	3	0.70606	0.72691	0.99999	15950	1	0.015779	0.039655	0.959427	883	2
TFAP4	3	0.94631	0.94638	0.99999	20698	0	0.015792	0.039682	0.959427	884	2
SLC25A35;RANGRF	1	0.98418	0.9843	0.99999	21657	0	0.01582	0.039753	0.959427	885	1
FANCF	3	0.98417	0.98429	0.99999	21656	0	0.01583	0.039776	0.959427	886	3
CRYBA4	3	0.97512	0.97537	0.99999	21446	0	0.015845	0.039812	0.959427	887	3
SPIDR;KIAA0146	1	0.98415	0.98427	0.99999	21655	0	0.015851	0.039829	0.959427	888	1
EIF3CL;EIF3C	3	0.98409	0.98422	0.99999	21654	0	0.015907	0.039963	0.959427	889	3
TMEM133	3	0.98408	0.98421	0.99999	21653	0	0.015916	0.039988	0.959427	890	3
TMEM86B	3	0.258	0.38642	0.997908	8465	2	0.015938	0.040034	0.959427	891	1
JUNB	3	0.98405	0.98418	0.99999	21652	0	0.015949	0.040063	0.959427	892	3
CACNG3	3	0.93901	0.93906	0.99999	20527	0	0.015954	0.040074	0.959427	893	2
SSSCA1	3	0.98404	0.98417	0.99999	21651	0	0.015958	0.040085	0.959427	894	3
TMEM88	3	0.71153	0.73093	0.99999	16031	1	0.015984	0.040155	0.959427	895	2
SMPD3	3	0.98399	0.98411	0.99999	21649	0	0.016012	0.040232	0.959427	896	3
NUCB1	3	0.86169	0.86205	0.99999	18866	0	0.01603	0.040279	0.959427	897	2
GNA11	3	0.94225	0.94227	0.99999	20607	0	0.016038	0.040299	0.959427	898	2
MAPK6	3	0.89173	0.89173	0.99999	19507	0	0.016064	0.040369	0.959427	899	2
ZNF609	3	0.24113	0.36804	0.997908	8075	1	0.016077	0.040398	0.959427	900	2
IFT46	3	0.98391	0.98404	0.99999	21648	0	0.016086	0.040426	0.959427	901	3
hsa-mir-372	4	0.85646	0.85684	0.99999	18759	1	0.016087	0.040426	0.959427	902	3
hsa-mir-550b-2;hsa-mir-550b-1;hsa-mir-550a-2;hsa-mir-550a-1	2	0.9839	0.98403	0.99999	21647	0	0.016098	0.040453	0.959427	903	2
CCDC28A	3	0.9839	0.98403	0.99999	21646	0	0.016104	0.040465	0.959427	904	3
SLC35F3	3	0.30278	0.43523	0.997908	9565	1	0.01611	0.040479	0.959427	905	2
AXIN1	3	0.98388	0.98401	0.99999	21645	0	0.016116	0.040494	0.959427	906	3
IGSF22	3	0.91672	0.91678	0.99999	20037	0	0.016123	0.04051	0.959427	907	2
CASP8	3	0.25737	0.38578	0.997908	8451	2	0.016123	0.040511	0.959427	908	1
BCMO1	3	0.98387	0.984	0.99999	21644	0	0.016131	0.04053	0.959427	909	3
FAM228A	3	0.54615	0.62377	0.99999	13717	1	0.01617	0.040624	0.959427	910	1
ZNF90	3	0.10314	0.20537	0.984919	4584	1	0.016195	0.040688	0.959427	911	2
S1PR5	3	0.24802	0.37554	0.997908	8252	2	0.016216	0.040739	0.959427	912	1
KRTAP5-8	3	0.85973	0.86012	0.99999	18823	0	0.016241	0.040794	0.959427	913	2
OR10S1	3	0.98374	0.98386	0.99999	21642	0	0.016257	0.040831	0.959427	914	3
UBALD1	3	0.17178	0.28849	0.995468	6362	1	0.016309	0.040942	0.959427	915	2
BNIP2	3	0.98368	0.98379	0.99999	21641	0	0.016318	0.040956	0.959427	916	3
BDKRB1	3	0.98365	0.98377	0.99999	21640	0	0.016348	0.041025	0.959427	917	3
DEFB124	3	0.20399	0.32626	0.997217	7201	2	0.016355	0.041049	0.959427	918	1
ZNF37A	3	0.98364	0.98376	0.99999	21639	0	0.01636	0.041064	0.959427	919	3
hsa-mir-516b-2	2	0.98363	0.98375	0.99999	21638	0	0.016365	0.041076	0.959427	920	2
VAPB	3	0.72527	0.74121	0.99999	16253	1	0.016372	0.041094	0.959427	921	2
ESRRB	3	0.18409	0.30308	0.995468	6697	1	0.016402	0.041165	0.959427	922	2
PTPRE	3	0.11256	0.21698	0.987511	4837	2	0.016448	0.041282	0.959427	923	1
hsa-mir-922	4	0.8677	0.86802	0.99999	18979	1	0.016451	0.041286	0.959427	924	2
C14orf1	3	0.98351	0.98364	0.99999	21637	0	0.01649	0.041384	0.959427	925	3
hsa-mir-133a-2	4	0.98349	0.98362	0.99999	21636	0	0.016508	0.041421	0.959427	926	4
ABCC11	3	0.13415	0.24332	0.991965	5384	1	0.016537	0.041483	0.959427	927	2
KCNJ13	3	0.0045209	0.012019	0.961145	250	1	0.016541	0.041493	0.959427	928	1
UBAP1L	3	0.78557	0.78958	0.99999	17287	1	0.01657	0.041568	0.959427	929	2
SOX7	3	0.98342	0.98354	0.99999	21635	0	0.016585	0.041602	0.959427	930	3
FLYWCH2	3	0.26508	0.39422	0.997908	8642	1	0.016649	0.041748	0.959427	931	2
APOL3	3	0.98334	0.98347	0.99999	21634	0	0.016664	0.041794	0.959427	932	3
RNF40	3	0.98333	0.98346	0.99999	21633	0	0.01667	0.041809	0.959427	933	3
ZFP14	3	0.9833	0.98344	0.99999	21632	0	0.016698	0.041867	0.959427	934	3
RTN4	3	0.42198	0.55408	0.997981	12191	1	0.016727	0.04194	0.959427	935	2
PYGO1	3	0.98327	0.98341	0.99999	21631	0	0.016728	0.041944	0.959427	936	3
ZNF791	3	0.98326	0.9834	0.99999	21630	0	0.016738	0.041966	0.959427	937	3
hsa-mir-3126	4	0.98326	0.9834	0.99999	21629	0	0.016739	0.041969	0.959427	938	4
FOXD4L6;FOXD4L3	1	0.98326	0.98339	0.99999	21628	0	0.016743	0.041978	0.959427	939	1
ANKRD36	3	0.98323	0.98337	0.99999	21627	0	0.016765	0.042035	0.959427	940	3
NR1D1	3	0.81441	0.81593	0.99999	17849	1	0.016773	0.042054	0.959427	941	1
GRIK3	3	0.21084	0.33412	0.997908	7351	1	0.016782	0.042082	0.959427	942	2
PHEX	3	0.43859	0.56283	0.997981	12392	1	0.016819	0.042148	0.959427	943	2
ZNF737	3	0.98317	0.9833	0.99999	21626	0	0.01683	0.042176	0.959427	944	3
hsa-mir-329-2	1	0.98313	0.98327	0.99999	21625	0	0.016868	0.042272	0.959427	945	1
FAM26D	3	0.97294	0.97313	0.99999	21399	0	0.016882	0.042299	0.959427	946	3
PDZD4	3	0.32229	0.45605	0.997908	10016	2	0.016912	0.042371	0.959427	947	1
FLRT3	3	0.8683	0.86862	0.99999	18996	0	0.016935	0.042424	0.959427	948	2
hsa-mir-6716	4	0.14436	0.25564	0.992833	5666	3	0.016939	0.042431	0.959427	949	1
PDK1	3	0.70735	0.72784	0.99999	15974	1	0.016959	0.042477	0.959427	950	1
C2orf88	3	0.83277	0.83368	0.99999	18259	0	0.016996	0.042569	0.959427	951	2
KRT23	3	0.42354	0.5549	0.997981	12210	1	0.017005	0.042591	0.959427	952	1
IRF4	3	0.18933	0.30922	0.995468	6827	1	0.017051	0.042703	0.959427	953	2
KLHL13	3	0.72394	0.74022	0.99999	16227	1	0.017056	0.042716	0.959427	954	2
hsa-mir-323b	4	0.88651	0.88648	0.99999	19390	1	0.017065	0.042731	0.959427	955	3
SYT16	3	0.98292	0.98307	0.99999	21624	0	0.017078	0.042759	0.959427	956	3
RAB3GAP2	3	0.98292	0.98306	0.99999	21623	0	0.017081	0.042767	0.959427	957	3
ITSN2	3	0.87302	0.87331	0.99999	19111	0	0.017098	0.042814	0.959427	958	2
MAD2L1BP	3	0.98289	0.98303	0.99999	21622	0	0.017112	0.042845	0.959427	959	3
SHPK	3	0.98284	0.98298	0.99999	21621	0	0.017159	0.042951	0.959427	960	3
NonTargetingControlGuideForHuman_0349	1	0.98277	0.98291	0.99999	21620	0	0.017227	0.043103	0.959427	961	1
MAP3K12	3	0.035122	0.083882	0.976877	1868	2	0.017237	0.043129	0.959427	962	1
PLA2R1	3	0.92912	0.92921	0.99999	20322	0	0.017237	0.043129	0.959427	963	2
SLC41A1	3	0.2112	0.33453	0.997908	7361	1	0.017283	0.043224	0.959427	964	2
LHX2	3	0.98271	0.98285	0.99999	21619	0	0.017287	0.043235	0.959427	965	3
TMEM255A	3	0.98271	0.98285	0.99999	21618	0	0.01729	0.043242	0.959427	966	3
DENND4A	3	0.98265	0.9828	0.99999	21617	0	0.017347	0.043372	0.959427	967	3
COG5	3	0.16589	0.28145	0.995468	6212	2	0.017376	0.043437	0.959427	968	1
ALAD	3	0.9826	0.98274	0.99999	21616	0	0.017403	0.043495	0.959427	969	3
SF3B2	3	0.016402	0.041334	0.961145	940	1	0.017413	0.043519	0.959427	970	2
hsa-mir-215	4	0.98258	0.98273	0.99999	21615	0	0.017422	0.043547	0.959427	971	4
TYROBP	3	0.20513	0.32757	0.997431	7227	1	0.017467	0.043646	0.959427	972	2
CTSB	3	0.90842	0.90847	0.99999	19857	0	0.017469	0.043649	0.959427	973	2
PATZ1	3	0.98253	0.98268	0.99999	21614	0	0.01747	0.043651	0.959427	974	3
CDY1B;CDY1	1	0.98252	0.98267	0.99999	21613	0	0.017478	0.043671	0.959427	975	1
MATN4	3	0.98252	0.98267	0.99999	21612	0	0.017479	0.043678	0.959427	976	3
TRAF7	3	0.98249	0.98264	0.99999	21611	0	0.017507	0.043739	0.959427	977	3
LCE3B	3	0.95974	0.95988	0.99999	21000	0	0.017508	0.04374	0.959427	978	3
DDX41	3	0.96418	0.96425	0.99999	21146	0	0.017542	0.043827	0.959427	979	3
NAA40	3	0.98242	0.98257	0.99999	21610	0	0.017577	0.043912	0.959427	980	3
STX17	3	0.98237	0.98252	0.99999	21609	0	0.017628	0.044032	0.959427	981	3
CD24	3	0.86551	0.86584	0.99999	18937	0	0.017644	0.044079	0.959427	982	2
PSMB8	3	0.025192	0.061675	0.976877	1381	2	0.017654	0.044102	0.959427	983	1
CHRNB3	3	0.11314	0.21769	0.987975	4852	1	0.017671	0.044139	0.959427	984	2
hsa-mir-7161	4	0.8224	0.82365	0.99999	18025	1	0.017696	0.044191	0.959427	985	3
CES3	3	0.89018	0.89015	0.99999	19455	0	0.017701	0.044201	0.959427	986	2
ANKRD46	3	0.0051757	0.013672	0.961145	290	1	0.017793	0.0444	0.959427	987	1
AMIGO3	3	0.98217	0.98232	0.99999	21607	0	0.017832	0.044487	0.959427	988	3
CAAP1	3	0.78563	0.78964	0.99999	17291	1	0.01784	0.044505	0.959427	989	2
ZBTB49	3	0.98215	0.9823	0.99999	21606	0	0.017851	0.044535	0.959427	990	3
BTN3A2	3	0.36762	0.50453	0.997908	11126	1	0.017924	0.044704	0.959427	991	2
LRRN1	3	0.69438	0.71855	0.99999	15768	1	0.017932	0.044722	0.959427	992	2
HENMT1	3	0.28548	0.41647	0.997908	9142	1	0.017979	0.044824	0.959427	993	1
KLC4	3	0.45781	0.57331	0.997981	12647	1	0.018025	0.044929	0.959427	994	1
NUDT2	3	0.98195	0.9821	0.99999	21604	0	0.018051	0.044978	0.959427	995	3
PFN3	3	0.9819	0.98205	0.99999	21603	0	0.018102	0.045107	0.959427	996	3
TMEM59L	3	0.70003	0.72259	0.99999	15864	1	0.018118	0.045139	0.959427	997	2
hsa-mir-5691	4	0.98187	0.98202	0.99999	21602	0	0.018135	0.045176	0.959427	998	4
GNGT1	3	0.4819	0.58666	0.999125	12924	1	0.018144	0.045201	0.959427	999	2
PTPRS	3	0.98185	0.982	0.99999	21601	0	0.018151	0.045215	0.959427	1000	3
SLC25A34	3	0.84165	0.8423	0.99999	18452	0	0.018158	0.045228	0.959427	1001	2
OLFM2	3	0.15927	0.27355	0.993698	6056	2	0.018164	0.045241	0.959427	1002	1
TAS2R7	3	0.83639	0.83719	0.99999	18327	0	0.018172	0.045259	0.959427	1003	2
CORO1B	3	0.8034	0.80558	0.99999	17635	1	0.018179	0.045277	0.959427	1004	2
GPR68	3	0.98181	0.98196	0.99999	21600	0	0.018193	0.045309	0.959427	1005	3
CEBPD	3	0.98174	0.98188	0.99999	21599	0	0.018265	0.04549	0.959427	1006	3
NUP210	3	0.18344	0.30234	0.995468	6684	1	0.018303	0.045567	0.959427	1007	2
CCDC69	3	0.621	0.66969	0.99999	14727	1	0.018331	0.045639	0.959427	1008	2
PSKH1	3	0.98166	0.98181	0.99999	21598	0	0.018343	0.045668	0.959427	1009	3
ITGB3	3	0.62075	0.66952	0.99999	14724	1	0.01835	0.045686	0.959427	1010	1
BEND7	3	0.91152	0.91164	0.99999	19930	0	0.018359	0.045707	0.959427	1011	2
PDLIM2	3	0.98163	0.98178	0.99999	21597	0	0.018372	0.045739	0.959427	1012	3
UNC5A	3	0.98161	0.98176	0.99999	21596	0	0.018389	0.045772	0.959427	1013	3
ACPT	3	0.91461	0.91475	0.99999	19999	0	0.018414	0.045828	0.959427	1014	2
TIMP3	3	0.98157	0.98172	0.99999	21594	0	0.018434	0.045877	0.959427	1015	3
ZNF43	3	0.70384	0.72531	0.99999	15909	1	0.018442	0.045892	0.959427	1016	2
ADD2	3	0.81578	0.81721	0.99999	17879	1	0.018456	0.045929	0.959427	1017	2
OR2F1	3	0.85211	0.85256	0.99999	18687	0	0.018489	0.046	0.959427	1018	2
SEPT11	3	0.98142	0.98158	0.99999	21592	0	0.018582	0.046237	0.959427	1019	3
ACTL7A	3	0.93539	0.93549	0.99999	20457	0	0.018628	0.046348	0.959427	1020	2
PRH2	3	0.60117	0.65752	0.99999	14463	1	0.01863	0.046352	0.959427	1021	2
PRSS12	3	0.96267	0.96277	0.99999	21100	0	0.018672	0.04645	0.959427	1022	3
CFHR1	3	0.38376	0.52143	0.997981	11483	1	0.018674	0.046455	0.959427	1023	2
MMP19	3	0.27576	0.40588	0.997908	8911	2	0.01872	0.046567	0.959427	1024	1
HBB	3	0.97043	0.97055	0.99999	21329	0	0.018721	0.046571	0.959427	1025	3
WNT9A	3	0.98125	0.98141	0.99999	21591	0	0.018747	0.046634	0.959427	1026	3
WSCD2	3	0.98122	0.98139	0.99999	21590	0	0.01878	0.046718	0.959427	1027	3
hsa-mir-548t	3	0.98121	0.98137	0.99999	21589	0	0.018794	0.046745	0.959427	1028	3
SLC35A2	3	0.034481	0.08247	0.976877	1841	1	0.018812	0.046793	0.959427	1029	2
KLHDC8A	3	0.94967	0.94981	0.99999	20771	0	0.018847	0.046888	0.959427	1030	3
YTHDC1	3	0.36212	0.4987	0.997908	10995	2	0.018859	0.046913	0.959427	1031	1
CDK5R2	3	0.98114	0.98131	0.99999	21587	0	0.018863	0.046924	0.959427	1032	3
APOL4	3	0.43433	0.56053	0.997981	12341	1	0.018906	0.047026	0.959427	1033	1
TMEM45B	3	0.91416	0.91429	0.99999	19991	0	0.018952	0.047135	0.959427	1034	2
COX7A2	3	0.981	0.98117	0.99999	21585	0	0.018997	0.047235	0.959427	1035	3
RAB31	3	0.69461	0.71872	0.99999	15773	1	0.018998	0.047239	0.959427	1036	2
FLI1	3	0.27637	0.40653	0.997908	8927	1	0.019009	0.047267	0.959427	1037	2
SEPT5	3	0.98097	0.98113	0.99999	21584	0	0.01903	0.047312	0.959427	1038	3
VCX3B	3	0.95802	0.95819	0.99999	20962	0	0.019045	0.047352	0.959427	1039	3
RTDR1	3	0.98091	0.98108	0.99999	21583	0	0.019087	0.047456	0.959427	1040	3
HEYL	3	0.28639	0.41744	0.997908	9164	2	0.019091	0.047463	0.959427	1041	1
OR5P3	3	0.98091	0.98107	0.99999	21582	0	0.019094	0.04747	0.959427	1042	3
CHST2	3	0.9809	0.98107	0.99999	21581	0	0.0191	0.047486	0.959427	1043	3
JMJD7-PLA2G4B;JMJD7	3	0.98089	0.98106	0.99999	21580	0	0.019107	0.047495	0.959427	1044	3
C16orf45	3	0.44479	0.56619	0.997981	12471	1	0.019115	0.047513	0.959427	1045	2
hsa-mir-4540	4	0.79859	0.80125	0.99999	17531	1	0.019122	0.047528	0.959427	1046	3
KCNK16	3	0.46421	0.57685	0.997981	12721	1	0.019137	0.047558	0.959427	1047	1
C11orf84	3	0.87945	0.87955	0.99999	19246	0	0.019151	0.047583	0.959427	1048	2
GAGE7;GAGE6;GAGE5;GAGE2E;GAGE2D;GAGE2C;GAGE2B;GAGE2A;GAGE13;GAGE12J;GAGE12I;GAGE12H;GAGE12G;GAGE12F;GAGE12E;GAGE12D;GAGE12C;GAGE12B;GAGE1	1	0.98085	0.98102	0.99999	21579	0	0.019151	0.047583	0.959427	1049	1
hsa-mir-4494	4	0.80279	0.80503	0.99999	17623	1	0.01916	0.047604	0.959427	1050	2
PSPN	3	0.98084	0.98101	0.99999	21578	0	0.019164	0.047615	0.959427	1051	3
KIAA1462	3	0.94066	0.9407	0.99999	20565	0	0.019179	0.047645	0.959427	1052	2
PTCD1	2	0.86979	0.87011	0.99999	19028	0	0.019191	0.047671	0.959427	1053	2
NKX3-1	3	0.98078	0.98095	0.99999	21577	0	0.019225	0.047753	0.959427	1054	3
TSPAN3	3	0.87345	0.87373	0.99999	19123	0	0.019229	0.047763	0.959427	1055	2
SPATA31A1	3	0.051987	0.11905	0.976877	2636	2	0.01923	0.047768	0.959427	1056	1
MKNK2	3	0.9807	0.98087	0.99999	21575	0	0.019296	0.047931	0.959427	1057	3
OR2H2	3	0.20562	0.32811	0.997431	7239	1	0.019321	0.047996	0.959427	1058	2
SPINT1	3	0.7245	0.74063	0.99999	16236	1	0.019322	0.048	0.959427	1059	1
NCKAP5	3	0.8603	0.86068	0.99999	18841	0	0.019369	0.04811	0.959427	1060	1
CLEC12B	3	0.9806	0.98077	0.99999	21574	0	0.019397	0.048184	0.959427	1061	3
hsa-mir-6736	4	0.070323	0.15542	0.976877	3472	2	0.019407	0.048208	0.959427	1062	2
AMZ1	3	0.98059	0.98076	0.99999	21573	0	0.019414	0.04822	0.959427	1063	3
TRMT2B	3	0.8365	0.8373	0.99999	18331	0	0.019415	0.048222	0.959427	1064	2
NonTargetingControlGuideForHuman_0912	1	0.98058	0.98076	0.99999	21572	0	0.019417	0.048226	0.959427	1065	1
COMMD4	3	0.58567	0.64803	0.99999	14261	1	0.019508	0.048435	0.959427	1066	1
RHOG	3	0.94202	0.94205	0.99999	20601	0	0.019513	0.048449	0.959427	1067	2
CYP4A11	3	0.98047	0.98065	0.99999	21571	0	0.019533	0.048495	0.959427	1068	3
THAP11	3	0.76311	0.77069	0.99999	16902	1	0.019542	0.048518	0.959427	1069	2
EIF2AK3	3	0.98046	0.98064	0.99999	21570	0	0.019543	0.048522	0.959427	1070	3
STAC3	3	0.77923	0.7842	0.99999	17174	1	0.019549	0.048532	0.959427	1071	2
SLC4A9	3	0.55657	0.62997	0.99999	13858	1	0.019554	0.048547	0.959427	1072	2
XIAP	3	0.88325	0.88322	0.99999	19327	0	0.019563	0.048566	0.959427	1073	2
CSTF2	3	0.93079	0.93085	0.99999	20356	0	0.019592	0.048632	0.959427	1074	2
ERAP1	3	0.13681	0.24654	0.991965	5457	2	0.0196	0.048656	0.959427	1075	1
hsa-mir-4737	4	0.97542	0.97566	0.99999	21456	0	0.019637	0.048733	0.959427	1076	3
ZBTB44	3	0.88696	0.88693	0.99999	19400	0	0.019649	0.048759	0.959427	1077	2
AK4	3	0.86231	0.86268	0.99999	18878	0	0.019656	0.048776	0.959427	1078	2
ETF1	3	0.9664	0.9665	0.99999	21204	0	0.019685	0.048837	0.959427	1079	3
ZNF780A	3	0.87561	0.87585	0.99999	19167	0	0.019693	0.048853	0.959427	1080	1
ANKHD1-EIF4EBP3	2	0.98024	0.98043	0.99999	21568	0	0.019758	0.049011	0.959427	1081	2
hsa-mir-33b	4	0.98024	0.98042	0.99999	21567	0	0.01976	0.049012	0.959427	1082	4
HAP1	3	0.87247	0.8728	0.99999	19096	0	0.019785	0.049066	0.959427	1083	2
ERMAP	3	0.78961	0.79315	0.99999	17373	1	0.019832	0.049171	0.959427	1084	1
ZNF740	3	0.8347	0.83556	0.99999	18299	0	0.019878	0.04928	0.959427	1085	2
KBTBD12	3	0.98011	0.98029	0.99999	21566	0	0.019889	0.049303	0.959427	1086	3
ZNF836	3	0.31557	0.44894	0.997908	9861	1	0.019924	0.049385	0.959427	1087	2
LRRC14B	3	0.75116	0.76111	0.99999	16692	1	0.019965	0.049479	0.959427	1088	2
SIRT5	3	0.27765	0.4079	0.997908	8963	1	0.019971	0.049494	0.959427	1089	2
SNX14	3	0.91544	0.91556	0.99999	20016	0	0.020009	0.049575	0.959427	1090	2
ITIH4	3	0.1698	0.28605	0.995468	6306	1	0.020017	0.049593	0.959427	1091	2
hsa-mir-4794	3	0.97998	0.98015	0.99999	21565	0	0.02002	0.0496	0.959427	1092	3
GALT	3	0.97989	0.98006	0.99999	21564	0	0.020107	0.049799	0.959427	1093	3
ZNHIT3	3	0.67061	0.70202	0.99999	15430	1	0.02011	0.049806	0.959427	1094	1
HOXD1	3	0.97986	0.98002	0.99999	21562	0	0.020145	0.049882	0.959427	1095	3
FAM49A	3	0.88192	0.88193	0.99999	19294	0	0.020146	0.049884	0.959427	1096	2
TVP23A	3	0.97984	0.98001	0.99999	21561	0	0.020159	0.049914	0.959427	1097	3
C1orf227	3	0.97983	0.97999	0.99999	21559	0	0.020169	0.049943	0.959427	1098	3
FGGY	3	0.9798	0.97996	0.99999	21558	0	0.020197	0.050008	0.959427	1099	3
hsa-mir-5000	4	0.39936	0.53788	0.997981	11830	2	0.020208	0.050044	0.959427	1100	2
ITK	3	0.49174	0.59215	0.99999	13037	1	0.020233	0.050108	0.959427	1101	2
ACTA1	3	0.9484	0.94855	0.99999	20739	0	0.020248	0.050147	0.959427	1102	3
hsa-mir-4770	4	0.39688	0.53521	0.997981	11777	1	0.020256	0.050167	0.959427	1103	3
RCL1	3	0.97972	0.97988	0.99999	21557	0	0.020277	0.050207	0.959427	1104	3
LOC100129520	3	0.9797	0.97987	0.99999	21556	0	0.020298	0.050251	0.959427	1105	3
OLFML2A	3	0.9797	0.97986	0.99999	21555	0	0.020302	0.050262	0.959427	1106	3
KRT6A	3	0.97967	0.97984	0.99999	21554	0	0.020329	0.050332	0.959427	1107	3
hsa-mir-4303	4	0.026661	0.065014	0.976877	1445	2	0.020331	0.050337	0.959427	1108	1
FAM188A	3	0.97967	0.97983	0.99999	21553	0	0.020333	0.050341	0.959427	1109	3
TNFRSF10A	3	0.80701	0.80891	0.99999	17705	1	0.020341	0.050361	0.959427	1110	1
VGLL2	3	0.89701	0.89697	0.99999	19619	0	0.02035	0.050379	0.959427	1111	2
KRTAP7-1	3	0.97964	0.97981	0.99999	21552	0	0.020361	0.050407	0.959427	1112	3
GALNT14	3	0.65858	0.69388	0.99999	15252	1	0.020364	0.050414	0.959427	1113	2
ITFG3	3	0.97959	0.97976	0.99999	21551	0	0.020406	0.050501	0.959427	1114	3
GRK6	3	0.7142	0.73293	0.99999	16073	1	0.020526	0.05077	0.959427	1115	2
TAZ	3	0.97947	0.97964	0.99999	21550	0	0.020533	0.050784	0.959427	1116	3
DRG2	3	0.97946	0.97964	0.99999	21549	0	0.020536	0.050792	0.959427	1117	3
hsa-mir-3689e;hsa-mir-3689b;hsa-mir-3689b	1	0.97946	0.97963	0.99999	21548	0	0.020543	0.050808	0.959427	1118	1
hsa-mir-892a	4	0.42835	0.5574	0.997981	12262	1	0.020554	0.050833	0.959427	1119	2
PATL2	3	0.88213	0.88212	0.99999	19303	0	0.020561	0.050847	0.959427	1120	2
GPR137	3	0.22668	0.3521	0.997908	7750	1	0.020619	0.050979	0.959427	1121	2
ZDHHC16	3	0.76226	0.76997	0.99999	16888	1	0.02062	0.05098	0.959427	1122	2
hsa-mir-548d-1;hsa-mir-548aa-1	4	0.54374	0.62232	0.99999	13688	1	0.020633	0.051011	0.959427	1123	3
SH2D1B	3	0.97933	0.97952	0.99999	21547	0	0.02067	0.051103	0.959427	1124	3
WDR38	3	0.87673	0.87692	0.99999	19185	0	0.020711	0.051193	0.959427	1125	1
SKOR1	3	0.84069	0.84136	0.99999	18425	0	0.020723	0.051217	0.959427	1126	2
GGACT	3	0.97912	0.97931	0.99999	21546	0	0.020876	0.051565	0.959427	1127	3
MAPKAP1	3	0.24222	0.3692	0.997908	8104	2	0.020896	0.05161	0.959427	1128	1
IL4	3	0.80004	0.80256	0.99999	17568	1	0.020942	0.051707	0.959427	1129	1
USP18	3	0.92303	0.92308	0.99999	20184	0	0.020973	0.051776	0.959427	1130	2
RAB12	3	0.97901	0.9792	0.99999	21545	0	0.020986	0.051804	0.959427	1131	3
PAQR3	3	0.58934	0.65029	0.99999	14302	1	0.020988	0.051805	0.959427	1132	2
IPO7	3	0.70712	0.72769	0.99999	15968	1	0.020989	0.051808	0.959427	1133	1
STAMBP	3	0.32338	0.45724	0.997908	10041	1	0.021017	0.051872	0.959427	1134	2
NonTargetingControlGuideForHuman_0272	1	0.97894	0.97914	0.99999	21544	0	0.021059	0.051971	0.959427	1135	1
PCDHB12	3	0.33902	0.47402	0.997908	10428	1	0.021081	0.052021	0.959427	1136	2
OR8S1	3	0.95903	0.95919	0.99999	20983	0	0.021128	0.052127	0.959427	1137	3
hsa-mir-4705	4	0.26018	0.38883	0.997908	8514	2	0.021143	0.052169	0.959427	1138	2
A4GALT	3	0.87527	0.87551	0.99999	19161	0	0.021151	0.052184	0.959427	1139	2
DCD	3	0.97885	0.97905	0.99999	21543	0	0.021155	0.052194	0.959427	1140	3
FBXL7	3	0.012964	0.033016	0.961145	735	1	0.021165	0.052213	0.959427	1141	2
LASP1	3	0.70525	0.72635	0.99999	15935	1	0.021174	0.05223	0.959427	1142	2
FKBP3	3	0.97879	0.979	0.99999	21542	0	0.021209	0.05231	0.959427	1143	3
MYBPC1	3	0.86449	0.86484	0.99999	18917	0	0.02122	0.052335	0.959427	1144	2
LMAN2	3	0.28493	0.41587	0.997908	9134	2	0.021266	0.052436	0.959427	1145	1
INTS4	3	0.97872	0.97892	0.99999	21541	0	0.021284	0.052472	0.959427	1146	3
ZNF256	3	0.8307	0.83169	0.99999	18202	0	0.021307	0.052523	0.959427	1147	2
OR5B12	3	0.028557	0.069291	0.976877	1543	2	0.021313	0.052541	0.959427	1148	1
IL17B	3	0.53297	0.61601	0.99999	13547	1	0.021314	0.052542	0.959427	1149	2
SCXB;SCXA	3	0.97865	0.97886	0.99999	21540	0	0.021349	0.052619	0.959427	1150	3
ZDHHC7	3	0.31914	0.45275	0.997908	9946	1	0.021351	0.052623	0.959427	1151	2
PDCD1LG2	3	0.97523	0.97548	0.99999	21449	0	0.021359	0.052635	0.959427	1152	3
TEX261	3	0.97863	0.97883	0.99999	21539	0	0.021374	0.052668	0.959427	1153	3
IRGM	3	0.77612	0.78156	0.99999	17121	1	0.021396	0.052711	0.959427	1154	2
SLC2A1	3	0.9786	0.97881	0.99999	21538	0	0.021396	0.052711	0.959427	1155	3
FXYD5	3	0.72364	0.74001	0.99999	16220	1	0.021405	0.052733	0.959427	1156	1
SPAG16	3	0.96922	0.96935	0.99999	21297	0	0.021411	0.052748	0.959427	1157	3
KIF3C	3	0.75313	0.76263	0.99999	16732	1	0.021451	0.052837	0.959427	1158	1
CD177	3	0.97852	0.97872	0.99999	21537	0	0.021479	0.0529	0.959427	1159	3
C12orf40	3	0.16764	0.28352	0.995468	6260	2	0.021544	0.053048	0.959427	1160	1
PWP1	3	0.97842	0.97862	0.99999	21535	0	0.021581	0.053129	0.959427	1161	3
hsa-mir-887	4	0.85692	0.85728	0.99999	18768	1	0.021585	0.053138	0.959427	1162	2
ANO1	3	0.74812	0.75871	0.99999	16631	1	0.02159	0.053148	0.959427	1163	2
NANOGNB	3	0.6583	0.6937	0.99999	15246	1	0.021613	0.0532	0.959427	1164	2
PRAMEF21;PRAMEF20	1	0.97838	0.97857	0.99999	21534	0	0.021622	0.053217	0.959427	1165	1
hsa-mir-3680-2;hsa-mir-3680-1	4	0.082376	0.17849	0.976877	4006	1	0.021624	0.053223	0.959427	1166	2
RFXANK	3	0.97837	0.97857	0.99999	21533	0	0.021628	0.05323	0.959427	1167	3
ALDH3B2	3	0.65233	0.6897	0.99999	15167	1	0.021636	0.053246	0.959427	1168	2
OR10Z1	3	0.97832	0.97851	0.99999	21532	0	0.021683	0.053344	0.959427	1169	3
NonTargetingControlGuideForHuman_0118	1	0.97832	0.97851	0.99999	21531	0	0.021685	0.053345	0.959427	1170	1
GLYATL1	3	0.90507	0.90507	0.99999	19794	0	0.021695	0.053368	0.959427	1171	2
AHI1	3	0.71787	0.73567	0.99999	16129	1	0.021703	0.05338	0.959427	1172	2
DCDC2	2	0.77557	0.78109	0.99999	17113	0	0.02173	0.053431	0.959427	1173	1
NonTargetingControlGuideForHuman_0398	1	0.97825	0.97845	0.99999	21530	0	0.021747	0.053482	0.959427	1174	1
SCN3A	3	0.97825	0.97845	0.99999	21529	0	0.021749	0.053485	0.959427	1175	3
ZNF559-ZNF177;ZNF177	1	0.97824	0.97844	0.99999	21528	0	0.021763	0.053522	0.959427	1176	1
PLEKHA4	3	0.40518	0.54408	0.997981	11975	1	0.021775	0.053547	0.959427	1177	2
MPP6	3	0.91327	0.91338	0.99999	19968	0	0.021785	0.053574	0.959427	1178	2
LZIC	3	0.97818	0.97839	0.99999	21527	0	0.021818	0.05365	0.959427	1179	3
PDE6H	3	0.17719	0.29487	0.995468	6503	1	0.021838	0.053697	0.959427	1180	2
MTSS1	3	0.97812	0.97832	0.99999	21526	0	0.021881	0.053794	0.959427	1181	3
SMG9	3	0.95054	0.95066	0.99999	20803	0	0.021914	0.05387	0.959427	1182	3
ING5	3	0.21208	0.33553	0.997908	7378	1	0.021921	0.053886	0.959427	1183	2
VSIG2	3	0.97806	0.97826	0.99999	21525	0	0.021939	0.053926	0.959427	1184	3
CYP19A1	3	0.97805	0.97824	0.99999	21524	0	0.02195	0.053954	0.959427	1185	3
GUCD1	3	0.19815	0.31949	0.997217	7038	1	0.02196	0.053981	0.959427	1186	1
WDYHV1	3	0.0065137	0.017122	0.961145	364	2	0.022006	0.054091	0.959427	1187	1
HSFY2;HSFY1	2	0.97798	0.97816	0.99999	21523	0	0.022022	0.054123	0.959427	1188	2
PKDCC	3	0.95791	0.95808	0.99999	20956	0	0.022034	0.054146	0.959427	1189	3
PAX5	3	0.97794	0.97813	0.99999	21522	0	0.022057	0.054201	0.959427	1190	3
IPO9	3	0.97791	0.9781	0.99999	21521	0	0.022087	0.05426	0.959427	1191	3
ZNF644	3	0.71842	0.73608	0.99999	16135	1	0.022099	0.054281	0.959427	1192	2
NAAA	3	0.9779	0.97809	0.99999	21520	0	0.022102	0.054288	0.959427	1193	3
WNT6	3	0.62784	0.67394	0.99999	14817	1	0.022102	0.054288	0.959427	1194	2
hsa-mir-18b	4	0.85071	0.85119	0.99999	18651	1	0.022117	0.054321	0.959427	1195	3
WDR34	3	0.97787	0.97805	0.99999	21519	0	0.022135	0.054365	0.959427	1196	3
HSPA5	3	0.025285	0.061871	0.976877	1384	1	0.022145	0.054385	0.959427	1197	1
OR2T10	3	0.97783	0.97802	0.99999	21518	0	0.022172	0.054446	0.959427	1198	3
hsa-mir-891b	4	0.78294	0.78737	0.99999	17235	1	0.022174	0.05445	0.959427	1199	3
hsa-mir-31	4	0.04148	0.097403	0.976877	2161	3	0.022178	0.054458	0.959427	1200	1
METTL24	3	0.78415	0.78838	0.99999	17262	1	0.022191	0.054489	0.959427	1201	2
HIVEP1	3	0.97779	0.97799	0.99999	21517	0	0.022209	0.054525	0.959427	1202	3
SRBD1	3	0.96919	0.96932	0.99999	21294	0	0.022237	0.05459	0.959427	1203	3
CDC37L1	3	0.97775	0.97796	0.99999	21516	0	0.022246	0.054609	0.959427	1204	3
ATRN	3	0.97774	0.97794	0.99999	21515	0	0.022261	0.054647	0.959427	1205	3
TAS2R20	3	0.90031	0.90025	0.99999	19699	0	0.022283	0.054698	0.959427	1206	2
RAB9B	3	0.2355	0.36188	0.997908	7947	1	0.022284	0.054699	0.959427	1207	2
DIRAS2	3	0.97769	0.9779	0.99999	21514	0	0.022305	0.054743	0.959427	1208	3
hsa-mir-8081	4	0.38779	0.52569	0.997981	11585	1	0.022312	0.054758	0.959427	1209	3
LCE1D	3	0.37692	0.51423	0.997908	11341	2	0.02233	0.054799	0.959427	1210	1
PCOLCE	3	0.97766	0.97788	0.99999	21513	0	0.022335	0.054809	0.959427	1211	3
NTM	3	0.97766	0.97787	0.99999	21512	0	0.022339	0.054818	0.959427	1212	3
HABP2	3	0.97764	0.97785	0.99999	21511	0	0.022358	0.054859	0.959427	1213	3
RPL6	3	0.61467	0.66579	0.99999	14635	1	0.022376	0.054895	0.959427	1214	1
SYT9	3	0.97756	0.97778	0.99999	21509	0	0.022436	0.055033	0.959427	1215	3
F8	3	0.61484	0.6659	0.99999	14639	1	0.022452	0.055064	0.959427	1216	2
IFNA2	3	0.82771	0.82881	0.99999	18128	0	0.022468	0.055099	0.959427	1217	1
STK24	3	0.9775	0.97772	0.99999	21508	0	0.022496	0.055166	0.959427	1218	3
GPATCH4	3	0.94964	0.94977	0.99999	20769	0	0.022515	0.055209	0.959427	1219	3
BOLA1	3	0.97748	0.97769	0.99999	21507	0	0.022522	0.055218	0.959427	1220	3
PABPN1;BCL2L2-PABPN1	3	0.76062	0.76869	0.99999	16858	1	0.022561	0.055304	0.959427	1221	1
FGD4	3	0.97726	0.97747	0.99999	21505	0	0.022743	0.055722	0.959427	1222	3
KIAA0319L	3	0.5769	0.64253	0.99999	14138	1	0.022746	0.055726	0.959427	1223	2
ABL2	3	0.97721	0.97743	0.99999	21504	0	0.022792	0.055834	0.959427	1224	3
PLOD3	3	0.97719	0.97741	0.99999	21503	0	0.022807	0.055878	0.959427	1225	3
RNF4	3	0.97719	0.9774	0.99999	21502	0	0.022815	0.05589	0.959427	1226	3
FAM83H	3	0.89566	0.8956	0.99999	19591	0	0.022838	0.055939	0.959427	1227	2
LRCH3	3	0.24035	0.3672	0.997908	8058	1	0.022873	0.056011	0.959427	1228	2
CCL17	3	0.33188	0.46628	0.997908	10237	1	0.022884	0.056038	0.959427	1229	2
FOXN4	3	0.52909	0.61371	0.99999	13491	1	0.022919	0.056107	0.959427	1230	2
NonTargetingControlGuideForHuman_0487	1	0.97708	0.97731	0.99999	21500	0	0.02292	0.05611	0.959427	1231	1
RCBTB1	3	0.2344	0.36065	0.997908	7925	1	0.02293	0.056133	0.959427	1232	2
UGT2B7	3	0.97706	0.97728	0.99999	21499	0	0.022944	0.056164	0.959427	1233	3
RASGRF2	3	0.97705	0.97727	0.99999	21498	0	0.022951	0.056179	0.959427	1234	3
MRFAP1L1	3	0.72045	0.7376	0.99999	16166	1	0.022965	0.056219	0.959427	1235	2
SLC39A3	3	0.87336	0.87365	0.99999	19120	0	0.022973	0.056234	0.959427	1236	2
NLRP5	3	0.97703	0.97726	0.99999	21497	0	0.022974	0.056234	0.959427	1237	3
hsa-mir-1233-2;hsa-mir-1233-1	4	0.67868	0.7076	0.99999	15545	1	0.022977	0.056241	0.959427	1238	3
CAPRIN1	3	0.97699	0.97723	0.99999	21496	0	0.023012	0.056316	0.959427	1239	3
C16orf95	3	0.22311	0.34811	0.997908	7669	1	0.023023	0.056341	0.959427	1240	2
C4orf45	3	0.97696	0.97719	0.99999	21495	0	0.023038	0.056381	0.959427	1241	3
GIMAP1-GIMAP5	2	0.97695	0.97718	0.99999	21494	0	0.023051	0.056409	0.959427	1242	2
UNC119	3	0.96119	0.96131	0.99999	21051	0	0.023115	0.056556	0.959427	1243	3
LCE3A	3	0.97686	0.97709	0.99999	21493	0	0.023145	0.056623	0.959427	1244	3
LPPR5	3	0.97685	0.97708	0.99999	21492	0	0.023152	0.056639	0.959427	1245	3
hsa-mir-507	4	0.036687	0.087255	0.976877	1940	3	0.023162	0.056662	0.959427	1246	1
CENPN	3	0.45859	0.57372	0.997981	12653	1	0.023181	0.056706	0.959427	1247	2
WFDC9	3	0.97681	0.97705	0.99999	21491	0	0.023187	0.05672	0.959427	1248	3
ZMYM6NB	3	0.96731	0.96742	0.99999	21237	0	0.023208	0.05676	0.959427	1249	3
SAA2-SAA4	2	0.61055	0.66326	0.99999	14578	1	0.023276	0.056939	0.959427	1250	1
MAP2K1	3	0.49311	0.59292	0.99999	13053	1	0.023282	0.056956	0.959427	1251	2
hsa-mir-27b	4	0.64155	0.68272	0.99999	14997	1	0.023285	0.056961	0.959427	1252	3
CD40	3	0.97671	0.97695	0.99999	21489	0	0.023286	0.056964	0.959427	1253	3
ANKRD44	3	0.9767	0.97693	0.99999	21488	0	0.023298	0.05699	0.959427	1254	3
RBM39	3	0.28511	0.41606	0.997908	9139	1	0.0233	0.056997	0.959427	1255	2
PPP1R3C	3	0.97668	0.97691	0.99999	21487	0	0.023324	0.057048	0.959427	1256	3
ISLR2	3	0.28161	0.41224	0.997908	9048	1	0.023346	0.057101	0.959427	1257	2
OR4C46	3	0.62129	0.66989	0.99999	14731	1	0.023352	0.057116	0.959427	1258	2
XPC	3	0.97662	0.97685	0.99999	21486	0	0.023378	0.057185	0.959427	1259	3
TBATA	3	0.26265	0.39159	0.997908	8578	2	0.023392	0.057218	0.959427	1260	1
ZBTB45	3	0.51341	0.6046	0.99999	13298	1	0.023406	0.057246	0.959427	1261	2
TTC5	3	0.47022	0.58019	0.998811	12782	1	0.023429	0.057294	0.959427	1262	2
EDN2	3	0.97655	0.97679	0.99999	21485	0	0.023447	0.057329	0.959427	1263	3
LDHD	3	0.19799	0.3193	0.997217	7033	1	0.023461	0.057357	0.959427	1264	2
SOX6	3	0.97652	0.97677	0.99999	21484	0	0.023478	0.057395	0.959427	1265	3
C9orf47	3	0.52707	0.61255	0.99999	13465	1	0.023485	0.057415	0.959427	1266	1
RPL39L	3	0.97651	0.97675	0.99999	21483	0	0.023493	0.057429	0.959427	1267	3
TRIM71	3	0.9765	0.97674	0.99999	21482	0	0.023505	0.057453	0.959427	1268	3
NonTargetingControlGuideForHuman_0924	1	0.97649	0.97673	0.99999	21481	0	0.023515	0.05747	0.959427	1269	1
SLFN12	3	0.76673	0.77375	0.99999	16963	1	0.023531	0.057506	0.959427	1270	2
COL4A3	3	0.97647	0.97671	0.99999	21480	0	0.023532	0.057507	0.959427	1271	3
FAM196B	3	0.97644	0.97669	0.99999	21479	0	0.023555	0.057557	0.959427	1272	3
ARID3C	3	0.97638	0.97662	0.99999	21478	0	0.023621	0.057702	0.959427	1273	3
NRL	3	0.97632	0.97656	0.99999	21477	0	0.023679	0.057833	0.959427	1274	3
RFWD2	3	0.956	0.95618	0.99999	20912	0	0.023716	0.05792	0.959427	1275	3
GATSL3	3	0.97626	0.9765	0.99999	21476	0	0.023741	0.05798	0.959427	1276	3
ABCC4	3	0.97622	0.97646	0.99999	21474	0	0.023775	0.058064	0.959427	1277	3
INPP1	3	0.95067	0.95079	0.99999	20809	0	0.023781	0.058075	0.959427	1278	3
LEO1	3	0.86104	0.8614	0.99999	18857	0	0.02382	0.058161	0.959427	1279	2
NonTargetingControlGuideForHuman_0296	1	0.97617	0.97641	0.99999	21473	0	0.023827	0.058181	0.959427	1280	1
PGAP3	3	0.903	0.90296	0.99999	19754	0	0.023854	0.058245	0.959427	1281	2
TBRG1	3	0.97614	0.97637	0.99999	21472	0	0.023865	0.058272	0.959427	1282	3
BCAM	3	0.97613	0.97637	0.99999	21471	0	0.023869	0.058284	0.959427	1283	3
KCNK1	3	0.97611	0.97636	0.99999	21470	0	0.023888	0.058329	0.959427	1284	3
ZNF541	3	0.97611	0.97635	0.99999	21469	0	0.023892	0.058337	0.959427	1285	3
DCBLD2	3	0.39628	0.53458	0.997981	11764	2	0.0239	0.058356	0.959427	1286	1
KIAA1704;GPALPP1	1	0.97609	0.97634	0.99999	21468	0	0.023906	0.058369	0.959427	1287	1
hsa-mir-581	4	0.42168	0.55392	0.997981	12188	2	0.023909	0.05838	0.959427	1288	2
OR10G8	3	0.88847	0.88842	0.99999	19425	0	0.023946	0.058456	0.959427	1289	1
MTRNR2L6	3	0.012406	0.031647	0.961145	700	1	0.023993	0.05856	0.959427	1290	2
FLOT1	3	0.97601	0.97625	0.99999	21467	0	0.023993	0.058561	0.959427	1291	3
hsa-mir-4491	4	0.66269	0.69663	0.99999	15318	1	0.024022	0.058622	0.959427	1292	3
CEP57L1	3	0.41268	0.54917	0.997981	12082	1	0.024039	0.058659	0.959427	1293	2
GRIN3B	3	0.97593	0.97617	0.99999	21466	0	0.024068	0.058723	0.959427	1294	3
LOC100129083	2	0.52507	0.61141	0.99999	13441	1	0.02411	0.058819	0.959427	1295	1
CDC42	3	0.97588	0.97612	0.99999	21465	0	0.024122	0.058844	0.959427	1296	3
SYNE4	3	0.97587	0.97611	0.99999	21464	0	0.02413	0.058857	0.959427	1297	3
hsa-mir-4269	4	0.32209	0.45583	0.997908	10011	1	0.024147	0.058897	0.959427	1298	3
UBE4A	3	0.18598	0.30533	0.995468	6739	1	0.024177	0.058953	0.959427	1299	1
HNRPLL	1	0.97578	0.97602	0.99999	21463	0	0.024218	0.059044	0.959427	1300	1
TOB2	3	0.10461	0.20717	0.985016	4629	2	0.024223	0.059055	0.959427	1301	1
hsa-mir-4715	4	0.69719	0.72055	0.99999	15814	1	0.024258	0.059135	0.959427	1302	3
PKIB	3	0.97574	0.97598	0.99999	21462	0	0.024264	0.059147	0.959427	1303	3
TMC5	3	0.91019	0.91028	0.99999	19896	0	0.02427	0.059158	0.959427	1304	2
ZNF438	3	0.94801	0.94815	0.99999	20727	0	0.024276	0.059173	0.959427	1305	3
SLC15A1	3	0.97568	0.97593	0.99999	21461	0	0.024319	0.059272	0.959427	1306	3
hsa-mir-7847	4	0.91512	0.91524	0.99999	20011	0	0.024387	0.059429	0.959427	1307	3
MSLN	3	0.97288	0.97306	0.99999	21395	0	0.024387	0.059429	0.959427	1308	3
PHKA2	3	0.62834	0.67425	0.99999	14822	1	0.024395	0.059451	0.959427	1309	2
SIK2	3	0.9756	0.97585	0.99999	21460	0	0.024398	0.059458	0.959427	1310	3
SEPHS1	3	0.92448	0.92457	0.99999	20214	0	0.024403	0.059473	0.959427	1311	2
TDGF1	3	0.97556	0.9758	0.99999	21458	0	0.024441	0.059553	0.959427	1312	3
hsa-mir-651	4	0.34297	0.47831	0.997908	10532	2	0.024452	0.059582	0.959427	1313	2
SCGB1D2	3	0.079594	0.17315	0.976877	3872	1	0.024454	0.059584	0.959427	1314	1
hsa-mir-382	3	0.90212	0.90206	0.99999	19738	0	0.02449	0.059647	0.959427	1315	2
PALM	3	0.72311	0.73961	0.99999	16211	1	0.0245	0.059669	0.959427	1316	2
AP1S2	3	0.60222	0.65814	0.99999	14474	1	0.024547	0.059771	0.959427	1317	1
CFD	3	0.97544	0.97568	0.99999	21457	0	0.024564	0.059811	0.959427	1318	3
VPS4B	3	0.97542	0.97566	0.99999	21455	0	0.024584	0.059852	0.959427	1319	3
RNF112	3	0.64212	0.68309	0.99999	15005	1	0.024593	0.059873	0.959427	1320	2
PPIL1	3	0.97539	0.97563	0.99999	21454	0	0.024607	0.059904	0.959427	1321	3
HOXB8	3	0.97537	0.9756	0.99999	21453	0	0.024631	0.059948	0.959427	1322	3
hsa-mir-4258	4	0.6963	0.71991	0.99999	15795	1	0.024637	0.059958	0.959427	1323	2
RNF111	3	0.9218	0.92185	0.99999	20154	0	0.024639	0.059963	0.959427	1324	2
hsa-mir-7855	4	0.57057	0.63864	0.99999	14055	2	0.024682	0.060062	0.959427	1325	2
MYO16	3	0.209	0.33203	0.997908	7313	2	0.024685	0.060068	0.959427	1326	1
FASTKD2	3	0.97531	0.97554	0.99999	21452	0	0.024691	0.06008	0.959427	1327	3
PRAMEF22	2	0.97529	0.97552	0.99999	21451	0	0.024713	0.060131	0.959427	1328	2
TRDMT1	3	0.97528	0.97552	0.99999	21450	0	0.024723	0.060147	0.959427	1329	3
DUOXA1	3	0.96318	0.96326	0.99999	21115	0	0.024761	0.06023	0.959427	1330	3
OSBP2	3	0.92882	0.92892	0.99999	20310	0	0.024785	0.060283	0.959427	1331	2
DPPA5	3	0.9752	0.97544	0.99999	21448	0	0.024802	0.060336	0.959427	1332	3
C9orf41	3	0.12714	0.23481	0.991184	5211	2	0.024823	0.060381	0.959427	1333	1
hsa-mir-499a	4	0.97623	0.97647	0.99999	21475	0	0.024847	0.060429	0.959427	1334	3
NonTargetingControlGuideForHuman_0385	1	0.97512	0.97537	0.99999	21447	0	0.024875	0.060486	0.959427	1335	1
PUS1	3	0.68758	0.71377	0.99999	15670	1	0.024916	0.060563	0.959427	1336	2
OR6Q1	3	0.71122	0.73069	0.99999	16026	1	0.024953	0.060655	0.959427	1337	2
IL9	3	0.62888	0.67459	0.99999	14829	1	0.024962	0.060671	0.959427	1338	2
SLIT1	3	0.975	0.97523	0.99999	21444	0	0.025002	0.060757	0.959427	1339	3
hsa-mir-6792	4	0.21058	0.33384	0.997908	7348	3	0.025005	0.060763	0.959427	1340	1
CACNA2D1	3	0.29277	0.42445	0.997908	9314	1	0.025008	0.060767	0.959427	1341	1
UCP2	3	0.51856	0.60761	0.99999	13355	1	0.025009	0.060771	0.959427	1342	2
SLC25A23	3	0.86672	0.86703	0.99999	18958	0	0.025017	0.060788	0.959427	1343	2
S100Z	3	0.9749	0.97512	0.99999	21443	0	0.025103	0.060986	0.959427	1344	3
HAO2	3	0.97483	0.97506	0.99999	21442	0	0.025171	0.061137	0.959427	1345	3
SLC28A1	3	0.83846	0.83924	0.99999	18385	0	0.025177	0.061148	0.959427	1346	2
C10orf11	3	0.97482	0.97505	0.99999	21441	0	0.025179	0.061157	0.959427	1347	3
TRMT5	3	0.92097	0.921	0.99999	20135	0	0.025192	0.061197	0.959427	1348	2
YAF2	3	0.97477	0.975	0.99999	21440	0	0.025232	0.061268	0.959427	1349	3
FAM181B	3	0.84846	0.84896	0.99999	18601	0	0.025239	0.061285	0.959427	1350	2
POLH	3	0.68248	0.7102	0.99999	15598	1	0.025285	0.06138	0.959427	1351	1
OR6C6	3	0.40046	0.53904	0.997981	11861	1	0.025298	0.061413	0.959427	1352	2
IMPG1	3	0.97469	0.97492	0.99999	21439	0	0.025309	0.061432	0.959427	1353	3
hsa-mir-486	1	0.97469	0.97491	0.99999	21438	0	0.025313	0.06144	0.959427	1354	1
TMEM106A	3	0.96746	0.96757	0.99999	21245	0	0.025331	0.061485	0.959427	1355	3
SECTM1	3	0.97465	0.97488	0.99999	21437	0	0.025345	0.061514	0.959427	1356	3
GPLD1	3	0.95585	0.95604	0.99999	20908	0	0.025355	0.061537	0.959427	1357	3
DMBX1	3	0.92889	0.92898	0.99999	20312	0	0.025395	0.061627	0.959427	1358	2
CA5A	3	0.9746	0.97483	0.99999	21436	0	0.025402	0.061642	0.959427	1359	3
NPR2	3	0.80929	0.8111	0.99999	17747	1	0.025451	0.061755	0.959427	1360	2
ADAMTS19	3	0.39444	0.53265	0.997981	11721	2	0.025469	0.061794	0.959427	1361	1
CMC2	3	0.97453	0.97474	0.99999	21434	0	0.025475	0.06181	0.959427	1362	3
CDHR1	3	0.84272	0.84335	0.99999	18474	0	0.025492	0.061848	0.959427	1363	2
QPCT	3	0.9745	0.97472	0.99999	21433	0	0.025495	0.061856	0.959427	1364	3
CDH24	3	0.68518	0.7121	0.99999	15630	1	0.025515	0.061901	0.959427	1365	1
PRSS16	3	0.59009	0.65075	0.99999	14313	1	0.025516	0.061902	0.959427	1366	2
SLC43A2	3	0.97448	0.9747	0.99999	21432	0	0.02552	0.061913	0.959427	1367	3
ZNF629	3	0.97447	0.97469	0.99999	21431	0	0.025528	0.061931	0.959427	1368	3
PLEKHB1	3	0.97444	0.97466	0.99999	21430	0	0.02556	0.062004	0.959427	1369	3
FAM221B	3	0.38009	0.51755	0.997981	11416	2	0.025561	0.062009	0.959427	1370	1
CDK7	3	0.13649	0.24615	0.991965	5451	1	0.025608	0.062107	0.959427	1371	2
SLC7A2	3	0.97439	0.9746	0.99999	21429	0	0.025613	0.062121	0.959427	1372	3
hsa-mir-6858	4	0.10208	0.20407	0.984919	4560	3	0.025619	0.062134	0.959427	1373	1
TMEM114	3	0.97437	0.97458	0.99999	21428	0	0.025634	0.062167	0.959427	1374	3
PSMC6	3	0.81943	0.82079	0.99999	17959	1	0.025654	0.062214	0.959427	1375	2
hsa-mir-3177	4	0.64806	0.68694	0.99999	15105	1	0.02567	0.062254	0.959427	1376	3
ASB15	3	0.9743	0.9745	0.99999	21427	0	0.025699	0.062317	0.959427	1377	3
CXorf30	3	0.92776	0.92783	0.99999	20288	0	0.0257	0.062318	0.959427	1378	2
XRCC1	3	0.97426	0.97446	0.99999	21426	0	0.025744	0.062409	0.959427	1379	3
C19orf25	3	0.26065	0.38933	0.997908	8525	2	0.025746	0.062412	0.959427	1380	1
GRID1	3	0.77562	0.78114	0.99999	17114	1	0.025768	0.062468	0.959427	1381	2
ERAL1	3	0.97423	0.97444	0.99999	21425	0	0.025768	0.062468	0.959427	1382	3
hsa-mir-8064	4	0.73835	0.75116	0.99999	16457	1	0.025769	0.062468	0.959427	1383	3
TUBGCP2	3	0.97422	0.97443	0.99999	21424	0	0.025785	0.062507	0.959427	1384	3
VCPIP1	3	0.33816	0.47308	0.997908	10407	2	0.025792	0.062522	0.959427	1385	1
KDM1B	3	0.53209	0.61549	0.99999	13535	1	0.025808	0.062568	0.959427	1386	2
LIMS3L;LIMS3	2	0.97419	0.97439	0.99999	21423	0	0.025812	0.062577	0.959427	1387	2
SLC26A1	3	0.87363	0.87391	0.99999	19127	0	0.025833	0.062625	0.959427	1388	2
hsa-let-7e	4	0.53136	0.61505	0.99999	13528	1	0.025835	0.062628	0.959427	1389	2
CHCHD5	3	0.6852	0.71211	0.99999	15631	1	0.025838	0.062637	0.959427	1390	1
CPNE5	3	0.90888	0.90892	0.99999	19870	0	0.025884	0.06274	0.959427	1391	2
SETBP1	3	0.26775	0.39707	0.997908	8705	1	0.025898	0.062767	0.959427	1392	2
SAP130	3	0.96076	0.96087	0.99999	21033	0	0.025906	0.062783	0.959427	1393	3
SCAI	3	0.0061105	0.016086	0.961145	345	1	0.02593	0.062845	0.959427	1394	2
AICDA	3	0.97405	0.97426	0.99999	21422	0	0.025949	0.062884	0.959427	1395	3
TEF	3	0.037444	0.088882	0.976877	1973	2	0.025976	0.062943	0.959427	1396	1
CBFA2T3	3	0.91122	0.91133	0.99999	19924	0	0.025979	0.062954	0.959427	1397	2
MAF1	3	0.85712	0.85749	0.99999	18770	0	0.026004	0.063012	0.959427	1398	2
C10orf53	3	0.28751	0.41866	0.997908	9196	2	0.026023	0.063053	0.959427	1399	1
FNIP1	3	0.95988	0.96001	0.99999	21006	0	0.026069	0.06316	0.959427	1400	3
NSDHL	3	0.97393	0.97413	0.99999	21421	0	0.026073	0.063167	0.959427	1401	3
NUDT9	3	0.97389	0.97409	0.99999	21420	0	0.026106	0.063246	0.959427	1402	3
C14orf142	3	0.7812	0.7859	0.99999	17204	1	0.026115	0.063267	0.959427	1403	1
CELF6	3	0.89276	0.89275	0.99999	19526	0	0.0262	0.063444	0.959427	1404	2
HOXA6	3	0.7385	0.75127	0.99999	16459	1	0.026207	0.063459	0.959427	1405	2
CADM4	3	0.97379	0.97399	0.99999	21419	0	0.026209	0.063463	0.959427	1406	3
DDX19A	3	0.97378	0.97398	0.99999	21418	0	0.026221	0.063491	0.959427	1407	3
ZBTB33	3	0.79577	0.79869	0.99999	17474	1	0.026253	0.063562	0.959427	1408	1
ITLN2	3	0.60199	0.65801	0.99999	14470	1	0.026345	0.063781	0.959427	1409	2
AGPAT1	3	0.85771	0.85809	0.99999	18784	0	0.026437	0.063973	0.959427	1410	2
PLXND1	3	0.056225	0.12763	0.976877	2844	1	0.026438	0.063973	0.959427	1411	2
SPRYD4	3	0.4771	0.58398	0.999001	12872	1	0.026454	0.064008	0.959427	1412	2
SH3PXD2A	3	0.31328	0.4464	0.997908	9806	1	0.026483	0.064084	0.959427	1413	1
ZNF862	3	0.97351	0.97371	0.99999	21416	0	0.026487	0.064093	0.959427	1414	3
TFF2	3	0.9735	0.9737	0.99999	21415	0	0.026504	0.064127	0.959427	1415	3
BICD2	3	0.36283	0.49947	0.997908	11010	1	0.026529	0.064177	0.959427	1416	2
KIAA1430	3	0.97347	0.97367	0.99999	21414	0	0.026529	0.064178	0.959427	1417	3
SHQ1	3	0.010636	0.027386	0.961145	599	2	0.02653	0.064179	0.959427	1418	1
USP36	3	0.97343	0.97363	0.99999	21413	0	0.026567	0.064258	0.959427	1419	3
FAM65B	3	0.9268	0.92688	0.99999	20265	0	0.026586	0.064299	0.959427	1420	2
RAB38	3	0.97341	0.97361	0.99999	21412	0	0.026587	0.064301	0.959427	1421	3
ERP27	3	0.91552	0.91564	0.99999	20019	0	0.026603	0.064338	0.959427	1422	2
DEFB127	3	0.34173	0.47691	0.997908	10498	1	0.026622	0.064378	0.959427	1423	2
NLRP12	3	0.97329	0.97348	0.99999	21410	0	0.026713	0.064573	0.959427	1424	3
MEGF11	3	0.6194	0.66869	0.99999	14699	1	0.02676	0.064671	0.959427	1425	2
FAM47B	3	0.19462	0.31544	0.996988	6967	1	0.02676	0.064674	0.959427	1426	2
NGB	3	0.1636	0.27871	0.995089	6167	1	0.026784	0.064718	0.959427	1427	2
hsa-mir-4650-1	3	0.9001	0.90003	0.99999	19693	0	0.026806	0.064762	0.959427	1428	2
MAGEE2	3	0.97314	0.97332	0.99999	21407	0	0.02686	0.064879	0.959427	1429	3
GLOD5	3	0.97313	0.97331	0.99999	21406	0	0.026868	0.064895	0.959427	1430	3
PTDSS1	3	0.97312	0.97329	0.99999	21405	0	0.026881	0.064927	0.959427	1431	3
ALKBH5	3	0.87636	0.87655	0.99999	19180	0	0.026898	0.064959	0.959427	1432	2
BIN1	3	0.95669	0.95686	0.99999	20924	0	0.026944	0.06505	0.959427	1433	3
GAB2	3	0.97303	0.97321	0.99999	21404	0	0.02697	0.065105	0.959427	1434	3
RASSF9	3	0.37485	0.51206	0.997908	11282	1	0.026975	0.065119	0.959427	1435	2
hsa-mir-548j	4	0.18979	0.30977	0.995468	6845	2	0.026976	0.06512	0.959427	1436	2
ARF4	3	0.97302	0.9732	0.99999	21403	0	0.026978	0.065128	0.959427	1437	3
OR14I1	3	0.73412	0.74787	0.99999	16395	1	0.02699	0.065158	0.959427	1438	2
SEMG2	3	0.97301	0.97319	0.99999	21402	0	0.026995	0.065166	0.959427	1439	3
CLINT1	3	0.97297	0.97316	0.99999	21401	0	0.027029	0.065249	0.959427	1440	3
SLIT3	3	0.97297	0.97315	0.99999	21400	0	0.027033	0.065259	0.959427	1441	3
USP32	3	0.20828	0.33119	0.997908	7298	2	0.027036	0.065265	0.959427	1442	1
PSRC1	3	0.97294	0.97312	0.99999	21398	0	0.027063	0.065328	0.959427	1443	3
UBR3	3	0.52244	0.60985	0.99999	13409	1	0.027083	0.065359	0.959427	1444	2
SPHK1	3	0.97291	0.97309	0.99999	21397	0	0.027088	0.065372	0.959427	1445	3
NOA1	3	0.9729	0.97308	0.99999	21396	0	0.027105	0.065407	0.959427	1446	3
PPBP	3	0.95895	0.95912	0.99999	20982	0	0.027116	0.06544	0.959427	1447	3
PSCA	3	0.72892	0.74396	0.99999	16310	1	0.027129	0.065477	0.959427	1448	2
RIPPLY3	2	0.97287	0.97305	0.99999	21394	0	0.02713	0.065479	0.959427	1449	2
SERP2	3	0.7683	0.77506	0.99999	16990	1	0.027175	0.065584	0.959427	1450	2
OR10G4	3	0.97282	0.97301	0.99999	21393	0	0.027177	0.065587	0.959427	1451	3
LAT2	3	0.95712	0.9573	0.99999	20940	0	0.027183	0.065596	0.959427	1452	3
ARHGAP18	3	0.81381	0.81536	0.99999	17837	1	0.027191	0.065617	0.959427	1453	2
TPO	3	0.45242	0.57035	0.997981	12578	1	0.027221	0.065686	0.959427	1454	1
PAX4	3	0.97278	0.97295	0.99999	21392	0	0.027224	0.065692	0.959427	1455	3
INTS5	3	0.91503	0.91515	0.99999	20009	0	0.027266	0.065791	0.959427	1456	2
GSTZ1	3	0.69813	0.72121	0.99999	15835	1	0.027267	0.065791	0.959427	1457	2
JPH1	3	0.24141	0.36832	0.997908	8083	1	0.027291	0.065844	0.959427	1458	2
CCDC126	3	0.64589	0.68553	0.99999	15067	1	0.027313	0.065896	0.959427	1459	1
DNAJB14	3	0.97267	0.97285	0.99999	21391	0	0.027326	0.065931	0.959427	1460	3
CD300LG	3	0.97266	0.97284	0.99999	21390	0	0.027338	0.065962	0.959427	1461	3
RPH3AL	3	0.57891	0.64374	0.99999	14162	1	0.027341	0.065966	0.959427	1462	2
RAG1	3	0.97266	0.97284	0.99999	21389	0	0.027343	0.06597	0.959427	1463	3
SPATA31D3	2	0.8702	0.87054	0.99999	19038	0	0.027352	0.065984	0.959427	1464	2
NKX6-1	3	0.91995	0.91999	0.99999	20109	0	0.027359	0.065996	0.959427	1465	2
CEACAM16	3	0.94083	0.94087	0.99999	20569	0	0.0274	0.066091	0.959427	1466	2
SELL	3	0.80156	0.80388	0.99999	17598	1	0.027405	0.066098	0.959427	1467	1
hsa-mir-514a-3;hsa-mir-514a-2;hsa-mir-514a-1	3	0.97258	0.97276	0.99999	21388	0	0.027415	0.066118	0.959427	1468	3
ACVR1B	3	0.97256	0.97274	0.99999	21386	0	0.027441	0.066179	0.959427	1469	3
GLRB	3	0.97255	0.97273	0.99999	21385	0	0.027449	0.066199	0.959427	1470	3
TMPRSS9	3	0.14749	0.25946	0.992833	5745	2	0.027451	0.066204	0.959427	1471	1
hsa-mir-3646	4	0.96979	0.96992	0.99999	21319	0	0.027458	0.066224	0.959427	1472	3
TXK	3	0.52852	0.61337	0.99999	13482	1	0.027459	0.066226	0.959427	1473	2
APOBEC3A	1	0.97253	0.97271	0.99999	21384	0	0.027471	0.066252	0.959427	1474	1
OR2B2	3	0.11245	0.21685	0.987511	4833	1	0.027497	0.06631	0.959427	1475	2
STAC	3	0.97247	0.97265	0.99999	21383	0	0.027535	0.066391	0.959427	1476	3
OR4C6	3	0.87615	0.87636	0.99999	19177	0	0.027543	0.066406	0.959427	1477	1
PAPSS2	3	0.97246	0.97264	0.99999	21382	0	0.027543	0.066407	0.959427	1478	3
EIF1AY	3	0.97244	0.97262	0.99999	21381	0	0.027565	0.066463	0.959427	1479	3
STXBP1	3	0.97243	0.97262	0.99999	21380	0	0.027569	0.066473	0.959427	1480	3
HNRNPA2B1	3	0.97243	0.97261	0.99999	21379	0	0.027573	0.066479	0.959427	1481	3
ASB10	3	0.12483	0.23198	0.991184	5150	2	0.027589	0.066515	0.959427	1482	1
NonTargetingControlGuideForHuman_0330	1	0.97239	0.97258	0.99999	21377	0	0.027612	0.066562	0.959427	1483	1
CCDC42	3	0.78646	0.79038	0.99999	17307	1	0.027651	0.066641	0.959427	1484	2
RFX2	3	0.97233	0.97253	0.99999	21376	0	0.027668	0.066676	0.959427	1485	3
POLR2A	3	0.46409	0.57678	0.997981	12718	1	0.027681	0.066705	0.959427	1486	2
DNAJC18	3	0.97229	0.97248	0.99999	21375	0	0.027711	0.066776	0.959427	1487	3
C10orf76	3	0.97228	0.97246	0.99999	21374	0	0.027723	0.066803	0.959427	1488	3
MFAP5	3	0.11175	0.21598	0.987037	4817	2	0.027727	0.06681	0.959427	1489	1
SEMA7A	3	0.48673	0.58932	0.999125	12984	1	0.027773	0.066894	0.959427	1490	1
EFHD2	3	0.51475	0.60537	0.99999	13311	1	0.027819	0.066987	0.959427	1491	2
hsa-mir-211	4	0.44724	0.56749	0.997981	12508	1	0.027852	0.067055	0.959427	1492	3
SLC6A8	3	0.27254	0.40234	0.997908	8822	2	0.027865	0.067086	0.959427	1493	1
OR13C8	3	0.83503	0.83587	0.99999	18302	0	0.02787	0.067096	0.959427	1494	2
ACIN1	3	0.97212	0.97229	0.99999	21373	0	0.027878	0.067115	0.959427	1495	3
SEMA4F	3	0.3098	0.44271	0.997908	9729	1	0.027879	0.067115	0.959427	1496	2
MYCT1	3	0.96446	0.96453	0.99999	21159	0	0.027887	0.067128	0.959427	1497	3
ZNFX1	3	0.97209	0.97227	0.99999	21371	0	0.027909	0.067169	0.959427	1498	3
ST6GALNAC2	3	0.7536	0.76303	0.99999	16738	1	0.027912	0.067178	0.959427	1499	2
KRTAP6-1	3	0.97078	0.97093	0.99999	21337	0	0.027912	0.067178	0.959427	1500	3
hsa-mir-4294	4	0.95216	0.95226	0.99999	20836	0	0.027948	0.067264	0.959427	1501	2
FAM25A	3	0.97204	0.97221	0.99999	21370	0	0.027956	0.067282	0.959427	1502	3
EIF4A2	3	0.23761	0.36421	0.997908	7999	1	0.027971	0.067316	0.959427	1503	2
KRTAP16-1	3	0.026668	0.065032	0.976877	1447	1	0.028004	0.067398	0.959427	1504	2
KRT78	3	0.20433	0.32664	0.997222	7213	1	0.02805	0.067502	0.959427	1505	1
SLC23A1	3	0.89127	0.89124	0.99999	19489	0	0.028064	0.067539	0.959427	1506	2
NBEA	3	0.97193	0.97211	0.99999	21369	0	0.028073	0.067561	0.959427	1507	3
LAMTOR4	3	0.86088	0.86125	0.99999	18852	0	0.028096	0.067613	0.959427	1508	1
FRMD1	3	0.45468	0.57161	0.997981	12609	1	0.028098	0.067615	0.959427	1509	2
NDRG3	3	0.9719	0.97208	0.99999	21368	0	0.028099	0.067618	0.959427	1510	3
STOX1	3	0.27311	0.40297	0.997908	8842	1	0.028123	0.067672	0.959427	1511	2
ZNF366	3	0.97187	0.97205	0.99999	21367	0	0.028129	0.067685	0.959427	1512	3
MACC1	3	0.97186	0.97205	0.99999	21366	0	0.028138	0.067702	0.959427	1513	3
MYLIP	3	0.97183	0.97201	0.99999	21365	0	0.028173	0.067777	0.959427	1514	3
CXCL11	3	0.97178	0.97197	0.99999	21364	0	0.028216	0.067885	0.959427	1515	3
GSX1	3	0.58708	0.64888	0.99999	14271	1	0.028217	0.067886	0.959427	1516	2
REPIN1	3	0.72317	0.73966	0.99999	16212	1	0.028234	0.06793	0.959427	1517	1
LY96	3	0.97174	0.97192	0.99999	21363	0	0.028264	0.067995	0.959427	1518	3
PDXP	3	0.94789	0.94802	0.99999	20724	0	0.028326	0.068137	0.959427	1519	3
GRHL3	3	0.16206	0.27688	0.993821	6135	1	0.028352	0.068192	0.959427	1520	2
PLAU	3	0.97164	0.9718	0.99999	21360	0	0.028364	0.068215	0.959427	1521	3
GPATCH2	3	0.78454	0.7887	0.99999	17270	1	0.028372	0.068233	0.959427	1522	1
SCRG1	3	0.97162	0.97179	0.99999	21359	0	0.028377	0.068252	0.959427	1523	3
S100A3	3	0.95782	0.958	0.99999	20954	0	0.028378	0.068253	0.959427	1524	3
SLC25A12	3	0.97161	0.97178	0.99999	21358	0	0.028386	0.068269	0.959427	1525	3
TMEM59	3	0.92572	0.92579	0.99999	20247	0	0.028418	0.068344	0.959427	1526	2
TCTEX1D1	3	0.44849	0.56817	0.997981	12524	1	0.028429	0.068368	0.959427	1527	2
hsa-mir-3622b;hsa-mir-3622a	3	0.97154	0.97171	0.99999	21357	0	0.028456	0.068421	0.959427	1528	3
ZNF429	3	0.21791	0.3422	0.997908	7538	2	0.028464	0.068442	0.959427	1529	1
ENTPD5	3	0.97149	0.97166	0.99999	21356	0	0.028509	0.06854	0.959427	1530	3
BPIFB3	3	0.97148	0.97165	0.99999	21355	0	0.028522	0.068577	0.959427	1531	3
DAK	3	0.89893	0.89887	0.99999	19665	0	0.028556	0.068649	0.959427	1532	1
ANXA6	3	0.97143	0.97161	0.99999	21354	0	0.02857	0.068672	0.959427	1533	3
RGS19	3	0.24379	0.37093	0.997908	8156	2	0.028602	0.068745	0.959427	1534	1
ME2	3	0.19847	0.31985	0.997217	7048	1	0.028616	0.068777	0.959427	1535	2
NMNAT3	3	0.97138	0.97155	0.99999	21353	0	0.028618	0.068781	0.959427	1536	3
hsa-mir-4796	4	0.97762	0.97783	0.99999	21510	0	0.028626	0.068793	0.959427	1537	3
FAM122B	3	0.97136	0.97152	0.99999	21352	0	0.028645	0.068837	0.959427	1538	3
METTL1	3	0.67128	0.70249	0.99999	15439	1	0.028694	0.068952	0.959427	1539	2
KDM4A	3	0.55372	0.62824	0.99999	13818	1	0.02874	0.069039	0.959427	1540	2
HARS	3	0.97124	0.9714	0.99999	21349	0	0.028763	0.069086	0.959427	1541	3
IP6K3	3	0.94053	0.94056	0.99999	20563	0	0.028786	0.069139	0.959427	1542	2
PPHLN1	3	0.97118	0.97134	0.99999	21348	0	0.028821	0.069213	0.959427	1543	3
ACRC	3	0.97117	0.97133	0.99999	21347	0	0.028829	0.069235	0.959427	1544	3
LNX2	3	0.96837	0.96853	0.99999	21275	0	0.028838	0.069251	0.959427	1545	3
CNKSR2	3	0.91407	0.91418	0.99999	19987	0	0.028864	0.069313	0.959427	1546	2
hsa-mir-6079	4	0.088733	0.18734	0.978028	4210	3	0.028866	0.069317	0.959427	1547	1
TAP1	3	0.94645	0.94653	0.99999	20703	0	0.028878	0.069346	0.959427	1548	2
VCY1B;VCY;VCX3A;VCX	1	0.97109	0.97124	0.99999	21346	0	0.02891	0.069416	0.959427	1549	1
hsa-mir-4780	4	0.65396	0.69077	0.99999	15193	1	0.028935	0.069464	0.959427	1550	2
LCNL1	3	0.031897	0.076686	0.976877	1711	2	0.02897	0.06955	0.959427	1551	1
LOC100289561	3	0.97103	0.97119	0.99999	21344	0	0.028971	0.069552	0.959427	1552	3
PDZD2	3	0.97099	0.97115	0.99999	21343	0	0.029006	0.069626	0.959427	1553	3
SMURF1	3	0.137	0.24678	0.991965	5463	1	0.02901	0.06963	0.959427	1554	2
GLRA2	3	0.97097	0.97113	0.99999	21342	0	0.029028	0.069669	0.959427	1555	3
TMEM200C	3	0.97094	0.97111	0.99999	21341	0	0.029055	0.069725	0.959427	1556	3
ARPP21	3	0.13734	0.24721	0.991965	5475	2	0.029062	0.069743	0.959427	1557	1
CYB5RL	3	0.97093	0.97109	0.99999	21340	0	0.029073	0.069765	0.959427	1558	3
PGPEP1	3	0.19269	0.31319	0.995578	6924	2	0.029108	0.069845	0.959427	1559	1
STX12	3	0.85253	0.85297	0.99999	18697	0	0.029147	0.069938	0.959427	1560	2
USO1	3	0.78449	0.78866	0.99999	17269	1	0.029154	0.069954	0.959427	1561	2
ACHE	3	0.97081	0.97097	0.99999	21338	0	0.029193	0.070041	0.959427	1562	3
hsa-mir-92a-2	4	0.56049	0.6324	0.99999	13910	1	0.0292	0.070061	0.959427	1563	3
MAGOHB	3	0.84287	0.8435	0.99999	18480	0	0.029242	0.070167	0.959427	1564	2
PTK2	3	0.14046	0.25098	0.991965	5570	2	0.029246	0.070177	0.959427	1565	1
DRD1	3	0.9565	0.95667	0.99999	20921	0	0.029259	0.070207	0.959427	1566	3
MGRN1	3	0.3361	0.47087	0.997908	10352	1	0.029268	0.070224	0.959427	1567	2
MYL10	3	0.51596	0.60607	0.99999	13325	1	0.029292	0.070272	0.959427	1568	2
IPCEF1	3	0.64525	0.68514	0.99999	15057	1	0.029354	0.070423	0.959427	1569	2
KRTAP1-3	3	0.95704	0.95722	0.99999	20935	0	0.029363	0.070437	0.959427	1570	3
NonTargetingControlGuideForHuman_0059	1	0.97064	0.97077	0.99999	21334	0	0.029364	0.070442	0.959427	1571	1
TOR1AIP2	3	0.97063	0.97077	0.99999	21333	0	0.029371	0.070458	0.959427	1572	3
KIAA1614	3	0.79299	0.79616	0.99999	17429	1	0.029384	0.070491	0.959427	1573	1
ZFP57	3	0.034018	0.081442	0.976877	1817	2	0.02943	0.07059	0.959427	1574	1
LCE3C	3	0.97055	0.97069	0.99999	21332	0	0.029447	0.070629	0.959427	1575	3
GPATCH8	3	0.89122	0.89119	0.99999	19486	0	0.029476	0.070688	0.959427	1576	2
OXA1L	3	0.37897	0.51637	0.997981	11392	2	0.029522	0.070788	0.959427	1577	1
KRTAP5-11	3	0.97044	0.97057	0.99999	21330	0	0.029559	0.070865	0.959427	1578	3
ZNF354A	3	0.37461	0.51182	0.997908	11276	1	0.029568	0.070888	0.959427	1579	2
THEG	3	0.91932	0.91934	0.99999	20092	0	0.029614	0.070995	0.959427	1580	2
FAM83F	3	0.70444	0.72574	0.99999	15920	1	0.029631	0.071028	0.959427	1581	2
hsa-mir-5689	4	0.15032	0.26292	0.992833	5818	2	0.029657	0.071088	0.959427	1582	2
MAGEB10	3	0.97033	0.97046	0.99999	21328	0	0.029667	0.071113	0.959427	1583	3
CHD1	3	0.97027	0.97041	0.99999	21327	0	0.029725	0.071238	0.959427	1584	3
ANKRD30A	3	0.201	0.3228	0.997217	7111	2	0.029752	0.071301	0.959427	1585	1
KRT40	3	0.97023	0.97036	0.99999	21326	0	0.029775	0.071348	0.959427	1586	3
hsa-mir-6770-3	2	0.42987	0.55822	0.997981	12281	1	0.029788	0.071374	0.959427	1587	1
CPNE9	3	0.90336	0.90333	0.99999	19763	0	0.029798	0.071388	0.959427	1588	2
LOC643355	3	0.9702	0.97033	0.99999	21325	0	0.029802	0.071396	0.959427	1589	3
PPARGC1A	3	0.97014	0.97028	0.99999	21324	0	0.029856	0.071523	0.959427	1590	3
WTH3DI	3	0.68618	0.71279	0.99999	15650	1	0.029883	0.071581	0.959427	1591	2
LRFN4	3	0.95127	0.95139	0.99999	20816	0	0.02989	0.071595	0.959427	1592	3
USP17L5;USP17L30;USP17L29;USP17L28;USP17L27;USP17L26;USP17L25;USP17L24	1	0.96998	0.9701	0.99999	21322	0	0.030021	0.071881	0.959427	1593	1
C1orf110	3	0.96997	0.97009	0.99999	21321	0	0.030032	0.071905	0.959427	1594	3
hsa-mir-1247	4	0.40886	0.54719	0.997981	12040	2	0.030051	0.071949	0.959427	1595	2
ANKHD1	2	0.59077	0.65116	0.99999	14325	1	0.030065	0.071976	0.959427	1596	1
PSG11	3	0.3781	0.51543	0.997908	11372	1	0.03012	0.072093	0.959427	1597	2
hsa-mir-4658	4	0.37663	0.51392	0.997908	11334	1	0.030134	0.07213	0.959427	1598	3
PDE9A	3	0.39708	0.53544	0.997981	11779	1	0.030144	0.072146	0.959427	1599	2
hsa-mir-6789	4	0.19174	0.31208	0.995468	6895	3	0.030151	0.072156	0.959427	1600	1
UBXN11	3	0.96981	0.96994	0.99999	21320	0	0.030187	0.072233	0.959427	1601	3
B3GNT4	3	0.96425	0.96432	0.99999	21147	0	0.030212	0.072287	0.959427	1602	3
CKM	3	0.66964	0.70134	0.99999	15410	1	0.030241	0.072352	0.959427	1603	2
PMM1	3	0.12513	0.23234	0.991184	5159	1	0.030258	0.072388	0.959427	1604	2
STEAP1	3	0.96973	0.96985	0.99999	21318	0	0.030273	0.072428	0.959427	1605	3
MAP3K10	3	0.96722	0.96731	0.99999	21231	0	0.030304	0.072491	0.959427	1606	3
LIPI	3	0.44044	0.56376	0.997981	12415	1	0.030337	0.07256	0.959427	1607	2
ACSS2	3	0.83611	0.83692	0.99999	18320	0	0.030346	0.072578	0.959427	1608	2
DUSP3	3	0.40702	0.546	0.997981	12016	2	0.03035	0.072587	0.959427	1609	1
CDCA5	3	0.44678	0.56724	0.997981	12498	1	0.030354	0.072596	0.959427	1610	2
OR4F4;OR4F17	3	0.96964	0.96975	0.99999	21317	0	0.03036	0.072612	0.959427	1611	3
PDS5B	3	0.96963	0.96974	0.99999	21316	0	0.030374	0.072641	0.959427	1612	3
RBM47	3	0.96962	0.96974	0.99999	21315	0	0.030378	0.072653	0.959427	1613	3
FST	3	0.96961	0.96972	0.99999	21314	0	0.030387	0.072673	0.959427	1614	3
P2RY13	3	0.042115	0.098741	0.976877	2190	2	0.030396	0.072688	0.959427	1615	1
GK2	3	0.9696	0.96971	0.99999	21313	0	0.030397	0.072691	0.959427	1616	3
PGRMC1	3	0.96957	0.96968	0.99999	21312	0	0.030429	0.072763	0.959427	1617	3
GDA	3	0.70836	0.7286	0.99999	15990	1	0.030488	0.072895	0.959427	1618	2
CDC42EP3	3	0.86825	0.86858	0.99999	18993	0	0.030504	0.072938	0.959427	1619	2
SAGE1	3	0.96948	0.9696	0.99999	21310	0	0.030516	0.072962	0.959427	1620	3
DGUOK	3	0.96948	0.9696	0.99999	21309	0	0.03052	0.072967	0.959427	1621	3
TRIM27	3	0.96948	0.96959	0.99999	21308	0	0.030525	0.072979	0.959427	1622	3
GIMAP5	3	0.96945	0.96958	0.99999	21307	0	0.030548	0.073027	0.959427	1623	3
TBC1D3H;TBC1D3G;TBC1D3C;TBC1D3B;TBC1D3	1	0.96945	0.96957	0.99999	21306	0	0.030553	0.073038	0.959427	1624	1
CYP4F11	3	0.12672	0.23428	0.991184	5198	2	0.03058	0.073093	0.959427	1625	1
PRDM15	3	0.1644	0.27965	0.995468	6185	1	0.0306	0.073138	0.959427	1626	2
hsa-mir-502	4	0.042805	0.10021	0.976877	2227	2	0.030603	0.073146	0.959427	1627	2
FTHL17	3	0.96939	0.96952	0.99999	21305	0	0.030607	0.073159	0.959427	1628	3
ZNF585A	3	0.18459	0.30367	0.995468	6707	1	0.030625	0.073205	0.959427	1629	1
ICOS	3	0.85587	0.85624	0.99999	18747	0	0.030636	0.073226	0.959427	1630	2
HBE1	3	0.96936	0.96949	0.99999	21303	0	0.030644	0.073246	0.959427	1631	3
FRG2C	3	0.2125	0.33599	0.997908	7392	2	0.030671	0.073311	0.959427	1632	1
ASL	3	0.96933	0.96946	0.99999	21302	0	0.030672	0.073311	0.959427	1633	3
OR2T1	3	0.96931	0.96945	0.99999	21301	0	0.030685	0.073345	0.959427	1634	3
RPS6KB1	3	0.75915	0.76751	0.99999	16835	1	0.030688	0.073349	0.959427	1635	2
PRM1	3	0.55956	0.6318	0.99999	13895	1	0.030717	0.073408	0.959427	1636	1
FAM53C	3	0.96926	0.9694	0.99999	21300	0	0.030736	0.073447	0.959427	1637	3
CREBBP	3	0.74932	0.75964	0.99999	16658	1	0.030741	0.07346	0.959427	1638	2
NonTargetingControlGuideForHuman_0589	1	0.96924	0.96938	0.99999	21299	0	0.030756	0.073492	0.959427	1639	1
GFRA4	3	0.031548	0.075943	0.976877	1689	2	0.030763	0.073505	0.959427	1640	1
OR6C1	3	0.96924	0.96937	0.99999	21298	0	0.030764	0.073506	0.959427	1641	3
GOT1	3	0.56841	0.63733	0.99999	14025	1	0.030777	0.073539	0.959427	1642	2
BAI3	3	0.96921	0.96934	0.99999	21296	0	0.030787	0.073554	0.959427	1643	3
LOC100129480;C3orf83	3	0.96921	0.96934	0.99999	21295	0	0.030791	0.073565	0.959427	1644	3
PPIAL4E	2	0.96916	0.9693	0.99999	21293	0	0.03084	0.073673	0.959427	1645	2
TOP1MT	3	0.72575	0.74156	0.99999	16260	1	0.030855	0.073703	0.959427	1646	1
L3MBTL3	3	0.96914	0.96928	0.99999	21292	0	0.030856	0.073706	0.959427	1647	3
ALKBH7	3	0.96913	0.96927	0.99999	21291	0	0.03087	0.073738	0.959427	1648	3
hsa-mir-631	4	0.96066	0.96078	0.99999	21031	0	0.030882	0.073766	0.959427	1649	3
hsa-mir-5002	4	0.52491	0.61132	0.99999	13438	2	0.030884	0.073771	0.959427	1650	1
DNASE2	3	0.54279	0.62174	0.99999	13676	1	0.030891	0.073785	0.959427	1651	2
HIGD2A	3	0.96908	0.96923	0.99999	21290	0	0.030921	0.073845	0.959427	1652	3
RNF34	3	0.96907	0.96922	0.99999	21289	0	0.030925	0.073853	0.959427	1653	3
MYLK2	3	0.96907	0.96922	0.99999	21288	0	0.03093	0.073863	0.959427	1654	3
NonTargetingControlGuideForHuman_0578	1	0.96906	0.9692	0.99999	21287	0	0.030944	0.073894	0.959427	1655	1
C10orf71	3	0.92987	0.92995	0.99999	20338	0	0.030947	0.073903	0.959427	1656	2
C15orf56	3	0.26965	0.39918	0.997908	8748	2	0.030993	0.07401	0.959427	1657	1
hsa-mir-153-2;hsa-mir-153-1	1	0.96899	0.96914	0.99999	21286	0	0.031006	0.074034	0.959427	1658	1
hsa-mir-550a-3	3	0.087695	0.18607	0.978028	4186	1	0.031039	0.074104	0.959427	1659	1
hsa-mir-1255b-1	1	0.96895	0.96909	0.99999	21285	0	0.031053	0.074131	0.959427	1660	1
HIST2H2AA4;HIST2H2AA3	2	0.96892	0.96907	0.99999	21284	0	0.031076	0.074182	0.959427	1661	2
hsa-mir-3136	4	0.75306	0.76259	0.99999	16731	1	0.031112	0.074258	0.959427	1662	2
ZNF474	3	0.07091	0.15653	0.976877	3497	2	0.031131	0.074295	0.959427	1663	1
FGF19	3	0.96883	0.96899	0.99999	21282	0	0.031166	0.074376	0.959427	1664	3
OR52N4	3	0.54404	0.6225	0.99999	13689	1	0.031177	0.074403	0.959427	1665	2
hsa-mir-4762;hsa-mir-4762	1	0.96873	0.96888	0.99999	21281	0	0.031272	0.074591	0.959427	1666	1
LAMA3	3	0.96868	0.96884	0.99999	21280	0	0.031315	0.074684	0.959427	1667	3
NonTargetingControlGuideForHuman_0101	1	0.96867	0.96882	0.99999	21279	0	0.031335	0.074731	0.959427	1668	1
C1QTNF1	3	0.88593	0.88592	0.99999	19371	0	0.031361	0.074793	0.959427	1669	2
LILRA4	3	0.96861	0.96877	0.99999	21278	0	0.031385	0.074843	0.959427	1670	3
COL19A1	3	0.94979	0.94992	0.99999	20776	0	0.031388	0.074848	0.959427	1671	3
HLA-DQA2	3	0.66726	0.69975	0.99999	15382	1	0.031407	0.074895	0.959427	1672	2
YLPM1	3	0.96851	0.96866	0.99999	21277	0	0.031493	0.07508	0.959427	1673	3
CYP2B6	3	0.9351	0.93519	0.99999	20451	0	0.031544	0.075206	0.959427	1674	2
MAST4	3	0.87693	0.8771	0.99999	19193	0	0.03159	0.075307	0.959427	1675	2
INO80	3	0.96841	0.96857	0.99999	21276	0	0.031591	0.075307	0.959427	1676	3
BMP2	3	0.96157	0.96168	0.99999	21065	0	0.031636	0.075406	0.959427	1677	3
hsa-mir-181d	4	0.94821	0.94835	0.99999	20734	0	0.031637	0.075407	0.959427	1678	3
ACVR1C	3	0.96832	0.96847	0.99999	21274	0	0.03168	0.075496	0.959427	1679	3
MGAT5B	3	0.15124	0.264	0.992833	5844	2	0.031682	0.075503	0.959427	1680	1
PROCR	3	0.96832	0.96846	0.99999	21273	0	0.031685	0.075511	0.959427	1681	3
TAF1	3	0.12272	0.22943	0.991184	5090	1	0.03182	0.075777	0.959427	1682	2
CCR6	3	0.96816	0.9683	0.99999	21271	0	0.03184	0.075819	0.959427	1683	3
OR4C12	3	0.31379	0.44697	0.997908	9817	1	0.031866	0.075873	0.959427	1684	2
NDUFAF4	3	0.96813	0.96827	0.99999	21270	0	0.031868	0.075878	0.959427	1685	3
XIRP1	3	0.9681	0.96823	0.99999	21269	0	0.031901	0.07595	0.959427	1686	3
MOGAT1	3	0.9373	0.93736	0.99999	20492	0	0.031912	0.07597	0.959427	1687	2
NMT2	3	0.59146	0.65159	0.99999	14333	1	0.031915	0.075976	0.959427	1688	2
ANXA8	2	0.96807	0.9682	0.99999	21268	0	0.031931	0.076014	0.959427	1689	2
IGIP	3	0.58065	0.64488	0.99999	14188	1	0.031958	0.076068	0.959427	1690	1
SLC19A2	3	0.96803	0.96815	0.99999	21266	0	0.031972	0.076099	0.959427	1691	3
HIPK2	3	0.87849	0.87862	0.99999	19227	0	0.032004	0.076168	0.959427	1692	1
RYR2	3	0.96799	0.96811	0.99999	21265	0	0.032015	0.076195	0.959427	1693	3
C9orf171	3	0.96798	0.96811	0.99999	21264	0	0.03202	0.076203	0.959427	1694	3
PHF12	3	0.96798	0.9681	0.99999	21263	0	0.032024	0.076214	0.959427	1695	3
TUFT1	3	0.96796	0.96809	0.99999	21262	0	0.032038	0.076238	0.959427	1696	3
PPRC1	3	0.3175	0.451	0.997908	9910	1	0.032049	0.076264	0.959427	1697	2
OR52N2	3	0.96794	0.96806	0.99999	21260	0	0.032062	0.076295	0.959427	1698	3
CUL9	3	0.93053	0.93061	0.99999	20351	0	0.032086	0.076349	0.959427	1699	2
SNX2	3	0.89847	0.89838	0.99999	19651	0	0.032113	0.076405	0.959427	1700	2
REG3G	3	0.96787	0.96799	0.99999	21259	0	0.032133	0.076447	0.959427	1701	3
CLNS1A	3	0.88059	0.88065	0.99999	19270	0	0.032141	0.076466	0.959427	1702	2
SURF4	3	0.31335	0.44648	0.997908	9808	1	0.032185	0.076562	0.959427	1703	2
MMP2	3	0.96779	0.96791	0.99999	21258	0	0.032214	0.076637	0.959427	1704	3
AHSG	3	0.96777	0.96788	0.99999	21257	0	0.032233	0.076677	0.959427	1705	3
NAA30	3	0.28847	0.41972	0.997908	9219	2	0.032233	0.076678	0.959427	1706	1
hsa-mir-3690-2;hsa-mir-3690-1	4	0.62907	0.67473	0.99999	14832	1	0.032242	0.0767	0.959427	1707	3
CD99_Y;CD99_X	3	0.96774	0.96786	0.99999	21256	0	0.032257	0.076735	0.959427	1708	3
WDR73	3	0.96773	0.96785	0.99999	21255	0	0.032266	0.076757	0.959427	1709	3
CLN8	3	0.96772	0.96784	0.99999	21254	0	0.032276	0.076775	0.959427	1710	3
WDR45	3	0.5629	0.63387	0.99999	13944	1	0.032279	0.076783	0.959427	1711	1
TMEM214	3	0.96771	0.96782	0.99999	21253	0	0.032295	0.076815	0.959427	1712	3
STOML1	3	0.96766	0.96777	0.99999	21252	0	0.032342	0.076924	0.959427	1713	3
HSPA4L	3	0.091001	0.19018	0.978504	4280	1	0.032365	0.076969	0.959427	1714	2
SMN2;SMN1	1	0.96763	0.96775	0.99999	21251	0	0.032367	0.076972	0.959427	1715	1
CCL15	3	0.63404	0.67786	0.99999	14895	1	0.032371	0.076979	0.959427	1716	2
KRT39	3	0.96761	0.96773	0.99999	21250	0	0.032385	0.077006	0.959427	1717	3
DBT	3	0.96761	0.96772	0.99999	21249	0	0.03239	0.07702	0.959427	1718	3
POU2F2	3	0.96754	0.96765	0.99999	21248	0	0.032457	0.07717	0.959427	1719	3
C2orf76	3	0.96754	0.96765	0.99999	21247	0	0.032462	0.077181	0.959427	1720	3
RIT1	3	0.35306	0.48912	0.997908	10759	1	0.032463	0.077182	0.959427	1721	2
ERCC4	3	0.81482	0.81631	0.99999	17858	1	0.032508	0.077274	0.959427	1722	1
OR1G1	3	0.86734	0.86766	0.99999	18972	0	0.03251	0.077276	0.959427	1723	2
OR51A7	3	0.96745	0.96756	0.99999	21244	0	0.032548	0.077351	0.959427	1724	3
RNF144A	3	0.96745	0.96756	0.99999	21243	0	0.032552	0.07736	0.959427	1725	3
RHOH	3	0.080482	0.17483	0.976877	3919	1	0.032554	0.077368	0.959427	1726	2
GCKR	3	0.96744	0.96755	0.99999	21242	0	0.032557	0.077373	0.959427	1727	3
STXBP5	3	0.96744	0.96755	0.99999	21241	0	0.032562	0.077387	0.959427	1728	3
PGLYRP3	3	0.9674	0.96751	0.99999	21240	0	0.032595	0.077449	0.959427	1729	3
ZNF69	3	0.30732	0.44005	0.997908	9670	2	0.0326	0.077463	0.959427	1730	1
CLU	3	0.95777	0.95795	0.99999	20953	0	0.032627	0.07751	0.959427	1731	3
TNFAIP8L1	3	0.96737	0.96748	0.99999	21239	0	0.032629	0.077514	0.959427	1732	3
RASL10A	3	0.35747	0.49379	0.997908	10876	1	0.032646	0.077553	0.959427	1733	1
WDR5	3	0.96732	0.96743	0.99999	21238	0	0.032677	0.077632	0.959427	1734	3
PLK3	3	0.96731	0.96742	0.99999	21236	0	0.032691	0.077665	0.959427	1735	3
MUC17	3	0.9615	0.96163	0.99999	21064	0	0.032692	0.077667	0.959427	1736	3
PPP1R36	3	0.96362	0.96369	0.99999	21130	0	0.032709	0.077707	0.959427	1737	3
C6orf7	3	0.96728	0.96739	0.99999	21235	0	0.032715	0.077719	0.959427	1738	3
ETV7	3	0.93242	0.93247	0.99999	20394	0	0.032718	0.077722	0.959427	1739	2
MUM1L1	3	0.96727	0.96737	0.99999	21234	0	0.03273	0.077751	0.959427	1740	3
SUDS3	3	0.62684	0.67331	0.99999	14808	1	0.032745	0.077791	0.959427	1741	2
KRTAP20-2	3	0.96724	0.96734	0.99999	21232	0	0.032758	0.077821	0.959427	1742	3
FBXL16	3	0.052608	0.12032	0.976877	2664	1	0.032784	0.077874	0.959427	1743	2
NonTargetingControlGuideForHuman_0320	1	0.9672	0.96729	0.99999	21230	0	0.032805	0.077917	0.959427	1744	1
DZIP1	3	0.86794	0.86827	0.99999	18982	0	0.03283	0.07797	0.959427	1745	2
PPAN-P2RY11;PPAN	3	0.94774	0.94786	0.99999	20721	0	0.032876	0.078072	0.959427	1746	3
PKHD1	3	0.9671	0.96719	0.99999	21228	0	0.032903	0.078127	0.959427	1747	3
ZCCHC24	3	0.073151	0.16088	0.976877	3590	2	0.032922	0.07817	0.959427	1748	1
FAM156A	1	0.96704	0.96713	0.99999	21227	0	0.032961	0.078258	0.959427	1749	1
LHPP	3	0.34721	0.48286	0.997908	10619	1	0.032967	0.078271	0.959427	1750	1
IRS1	3	0.32258	0.45636	0.997908	10021	1	0.033036	0.078422	0.959427	1751	2
NonTargetingControlGuideForHuman_0041	1	0.96695	0.96703	0.99999	21226	0	0.033055	0.078464	0.959427	1752	1
MCCC1	3	0.07488	0.16415	0.976877	3658	1	0.033059	0.078473	0.959427	1753	1
FUCA2	3	0.9669	0.96698	0.99999	21225	0	0.033101	0.078561	0.959427	1754	3
ZNF219	3	0.65725	0.69297	0.99999	15231	1	0.033118	0.078592	0.959427	1755	2
CNGA4	3	0.96687	0.96696	0.99999	21224	0	0.03313	0.07862	0.959427	1756	3
hsa-mir-4790	3	0.38865	0.52657	0.997981	11605	2	0.033151	0.078662	0.959427	1757	1
PPP1R35	3	0.50524	0.59988	0.99999	13193	1	0.033197	0.07876	0.959427	1758	2
VN1R4	3	0.40671	0.54568	0.997981	12010	1	0.033228	0.078828	0.959427	1759	2
TMEM92	3	0.96677	0.96685	0.99999	21223	0	0.033232	0.078839	0.959427	1760	3
PPP1R2	3	0.96676	0.96685	0.99999	21222	0	0.033236	0.078848	0.959427	1761	3
APOBEC3D	3	0.036542	0.08696	0.976877	1936	2	0.033243	0.078858	0.959427	1762	1
ZNF432	3	0.96675	0.96683	0.99999	21221	0	0.033251	0.07888	0.959427	1763	3
SEMA3C	3	0.96673	0.96681	0.99999	21220	0	0.03327	0.078924	0.959427	1764	3
TSPYL6	3	0.88193	0.88194	0.99999	19295	0	0.033273	0.078931	0.959427	1765	2
RINL	3	0.96672	0.9668	0.99999	21219	0	0.033285	0.078959	0.959427	1766	3
LRRC56	3	0.012592	0.032103	0.961145	717	1	0.033289	0.078964	0.959427	1767	1
LIMK2	3	0.96671	0.9668	0.99999	21218	0	0.03329	0.078969	0.959427	1768	3
SMAD2	3	0.24172	0.36864	0.997908	8090	1	0.033319	0.079033	0.959427	1769	2
hsa-mir-362	4	0.55488	0.62894	0.99999	13832	2	0.033326	0.079045	0.959427	1770	2
NonTargetingControlGuideForHuman_0653	1	0.96666	0.96675	0.99999	21216	0	0.033336	0.079068	0.959427	1771	1
hsa-mir-6774	4	0.63266	0.67698	0.99999	14878	1	0.033341	0.079076	0.959427	1772	3
PTPRD	3	0.96661	0.9667	0.99999	21215	0	0.033387	0.079165	0.959427	1773	3
CD14	3	0.96658	0.96666	0.99999	21213	0	0.033421	0.079245	0.959427	1774	3
DGKE	3	0.82015	0.82149	0.99999	17973	1	0.033426	0.079256	0.959427	1775	2
RBMS1	3	0.96656	0.96664	0.99999	21212	0	0.03344	0.079282	0.959427	1776	3
MSRB3	3	0.96655	0.96663	0.99999	21211	0	0.033445	0.079294	0.959427	1777	3
NonTargetingControlGuideForHuman_0326	1	0.96655	0.96663	0.99999	21210	0	0.033446	0.079294	0.959427	1778	1
SLC2A6	3	0.96654	0.96663	0.99999	21209	0	0.033455	0.079314	0.959427	1779	3
EFCC1	3	0.96654	0.96662	0.99999	21208	0	0.033465	0.079339	0.959427	1780	3
ITGA2	3	0.96651	0.9666	0.99999	21206	0	0.033494	0.079399	0.959427	1781	3
NAA60	3	0.60812	0.66179	0.99999	14547	1	0.033518	0.079453	0.959427	1782	1
HNF1B	3	0.96645	0.96654	0.99999	21205	0	0.033548	0.079524	0.959427	1783	3
GPR88	3	0.73243	0.74661	0.99999	16360	1	0.033548	0.079525	0.959427	1784	2
POTEM;POTEB2;POTEB;LOC100996331;LOC100287399	1	0.9664	0.96649	0.99999	21203	0	0.033602	0.079635	0.959427	1785	1
TBC1D13	3	0.5845	0.6473	0.99999	14241	1	0.03361	0.079653	0.959427	1786	1
GSK3A	3	0.45211	0.57017	0.997981	12576	1	0.03364	0.079731	0.959427	1787	2
hsa-mir-4771-2;hsa-mir-4771-1	3	0.69049	0.71581	0.99999	15711	1	0.033658	0.079775	0.959427	1788	2
INS	1	0.96621	0.9663	0.99999	21202	0	0.03379	0.080046	0.959427	1789	1
GNRH2	3	0.87184	0.87217	0.99999	19081	0	0.033885	0.080243	0.959427	1790	1
LIPJ	3	0.43169	0.55916	0.997981	12302	1	0.033907	0.08029	0.959427	1791	2
EDN3	3	0.96608	0.96617	0.99999	21201	0	0.033915	0.080306	0.959427	1792	3
ATP5D	3	0.96607	0.96616	0.99999	21200	0	0.03393	0.080328	0.959427	1793	3
CCNT2	3	0.73507	0.74858	0.99999	16411	1	0.033971	0.080421	0.959427	1794	2
HAND1	3	0.83906	0.83981	0.99999	18397	0	0.033976	0.080434	0.959427	1795	1
DSC1	3	0.85425	0.85468	0.99999	18721	0	0.033999	0.080473	0.959427	1796	2
FNBP4	3	0.96595	0.96603	0.99999	21198	0	0.034053	0.080593	0.959427	1797	3
CNOT7	3	0.91902	0.91903	0.99999	20084	0	0.034055	0.080601	0.959427	1798	2
hsa-mir-1272	4	0.96311	0.9632	0.99999	21112	0	0.034067	0.080625	0.959427	1799	3
IQCC	3	0.55578	0.6295	0.99999	13844	1	0.034068	0.080628	0.959427	1800	1
STX16	3	0.96592	0.96601	0.99999	21196	0	0.034078	0.080641	0.959427	1801	3
TMEM99	3	0.6207	0.66949	0.99999	14722	1	0.034091	0.080676	0.959427	1802	2
PGBD2	3	0.96591	0.966	0.99999	21195	0	0.034092	0.080678	0.959427	1803	3
TAF5	3	0.81427	0.81581	0.99999	17845	1	0.034114	0.080718	0.959427	1804	1
FGF21	3	0.76876	0.77544	0.99999	17001	1	0.034138	0.08077	0.959427	1805	2
DMRT3	3	0.32168	0.45538	0.997908	10003	1	0.03416	0.080818	0.959427	1806	1
SLAMF1	3	0.96582	0.9659	0.99999	21194	0	0.034176	0.08084	0.959427	1807	3
ACOT2	3	0.88338	0.88336	0.99999	19329	0	0.034202	0.080902	0.959427	1808	2
KRTAP13-2	3	0.039377	0.092982	0.976877	2068	1	0.034206	0.080907	0.959427	1809	1
DMRTC1B;DMRTC1	1	0.96579	0.96586	0.99999	21193	0	0.034212	0.080918	0.959427	1810	1
KDELC2	3	0.96578	0.96586	0.99999	21192	0	0.034216	0.080926	0.959427	1811	3
QDPR	3	0.82028	0.82162	0.99999	17978	1	0.034221	0.080934	0.959427	1812	2
LRP3	3	0.38722	0.52511	0.997981	11568	1	0.034252	0.080998	0.959427	1813	1
hsa-mir-500a	3	0.96572	0.9658	0.99999	21191	0	0.034275	0.081044	0.959427	1814	3
ZNF2	3	0.53076	0.6147	0.99999	13516	1	0.034286	0.081067	0.959427	1815	2
PDIK1L	3	0.96571	0.96579	0.99999	21189	0	0.03429	0.081073	0.959427	1816	3
CT45A6;CT45A4;CT45A1	1	0.96571	0.96579	0.99999	21188	0	0.03429	0.081073	0.959427	1817	1
TNFRSF18	3	0.18951	0.30945	0.995468	6832	2	0.034343	0.08118	0.959427	1818	1
LTC4S	3	0.96565	0.96573	0.99999	21187	0	0.03435	0.081194	0.959427	1819	3
CHRNE	3	0.96563	0.96571	0.99999	21186	0	0.034369	0.081238	0.959427	1820	3
OAZ2	3	0.67368	0.7042	0.99999	15476	1	0.034388	0.081277	0.959427	1821	2
CAPN15	3	0.29593	0.42787	0.997908	9399	2	0.034389	0.081281	0.959427	1822	1
GRIA4	3	0.96561	0.96569	0.99999	21185	0	0.034389	0.081282	0.959427	1823	3
APOL2	3	0.96557	0.96565	0.99999	21184	0	0.034429	0.081371	0.959427	1824	3
OR2T2	3	0.80547	0.80748	0.99999	17678	1	0.034435	0.081387	0.959427	1825	2
SPATA31C1	3	0.93415	0.93425	0.99999	20430	0	0.034462	0.081441	0.959427	1826	2
OXSM	3	0.1478	0.25986	0.992833	5752	1	0.034481	0.081484	0.959427	1827	1
DDX24	3	0.9655	0.96558	0.99999	21182	0	0.034503	0.081533	0.959427	1828	3
ACVRL1	3	0.96549	0.96557	0.99999	21181	0	0.034513	0.081556	0.959427	1829	3
UST	3	0.0033042	0.008877	0.961145	188	1	0.034518	0.081564	0.959427	1830	2
NBL1;C1orf151-NBL1	2	0.034096	0.081627	0.976877	1821	1	0.034527	0.081582	0.959427	1831	1
CCR1	3	0.96544	0.96553	0.99999	21180	0	0.034558	0.081644	0.959427	1832	3
PLK1	3	0.073855	0.16223	0.976877	3613	1	0.034618	0.08177	0.959427	1833	1
FNDC3B	3	0.96536	0.96545	0.99999	21179	0	0.034638	0.081813	0.959427	1834	3
FRMD3	3	0.96533	0.9654	0.99999	21178	0	0.034673	0.081891	0.959427	1835	3
LAMP2	3	0.96531	0.96538	0.99999	21177	0	0.034693	0.081938	0.959427	1836	3
NVL	3	0.91828	0.91829	0.99999	20066	0	0.034756	0.082076	0.959427	1837	2
CLDN24	3	0.08292	0.17953	0.976877	4034	1	0.034802	0.082164	0.959427	1838	2
PSME4	3	0.96518	0.96524	0.99999	21175	0	0.034818	0.0822	0.959427	1839	3
ZKSCAN8	3	0.87746	0.87761	0.99999	19202	0	0.034844	0.082262	0.959427	1840	2
OTP	3	0.88091	0.88095	0.99999	19278	0	0.034847	0.082268	0.959427	1841	2
FAM43B	3	0.96513	0.9652	0.99999	21174	0	0.034868	0.082311	0.959427	1842	3
ACO2	3	0.31477	0.44805	0.997908	9843	1	0.034872	0.08232	0.959427	1843	2
DPH3	3	0.96512	0.96519	0.99999	21173	0	0.034883	0.082341	0.959427	1844	3
GPRIN1	3	0.27076	0.40037	0.997908	8776	1	0.034893	0.082358	0.959427	1845	1
ZC2HC1B	3	0.96509	0.96515	0.99999	21172	0	0.034913	0.0824	0.959427	1846	3
OR52N1	3	0.96506	0.96513	0.99999	21171	0	0.034938	0.082463	0.959427	1847	3
ZP2	3	0.30176	0.43414	0.997908	9544	2	0.034939	0.082465	0.959427	1848	1
SACM1L	3	0.11236	0.21673	0.987511	4828	1	0.034965	0.082518	0.959427	1849	2
OPRM1	3	0.96503	0.9651	0.99999	21170	0	0.034968	0.082525	0.959427	1850	3
RNF135	3	0.96498	0.96504	0.99999	21169	0	0.035023	0.082654	0.959427	1851	3
WNT8B	3	0.19108	0.3113	0.995468	6877	1	0.035031	0.082674	0.959427	1852	1
TLK2	3	0.67448	0.70474	0.99999	15495	1	0.035076	0.082779	0.959427	1853	1
AKAP12	3	0.87853	0.87867	0.99999	19228	0	0.035078	0.082782	0.959427	1854	2
OGFOD3	3	0.96491	0.96498	0.99999	21168	0	0.035089	0.082803	0.959427	1855	3
LOC284385	2	0.9649	0.96496	0.99999	21167	0	0.035103	0.082841	0.959427	1856	2
OR7D2	3	0.96489	0.96495	0.99999	21166	0	0.035114	0.082865	0.959427	1857	3
PPAT	3	0.96265	0.96275	0.99999	21098	0	0.035122	0.082892	0.959427	1858	3
HTR1F	3	0.0076985	0.020115	0.961145	433	1	0.035134	0.082915	0.959427	1859	2
NCDN	3	0.95678	0.95695	0.99999	20927	0	0.035181	0.083019	0.959427	1860	3
NCOA4	3	0.96477	0.96484	0.99999	21164	0	0.03523	0.08312	0.959427	1861	3
LUZP4	3	0.96476	0.96484	0.99999	21163	0	0.03524	0.083135	0.959427	1862	3
KLHL10	3	0.10039	0.20189	0.983853	4518	2	0.035306	0.083271	0.959427	1863	1
RNF5	3	0.94321	0.94324	0.99999	20630	0	0.035331	0.083322	0.959427	1864	2
INO80D	3	0.96007	0.96019	0.99999	21015	0	0.035351	0.083365	0.959427	1865	3
FAM217A	3	0.96463	0.9647	0.99999	21162	0	0.035371	0.083414	0.959427	1866	3
OR4K5	3	0.088004	0.18644	0.978028	4195	1	0.035443	0.083558	0.959427	1867	1
PCDHGB1	2	0.96456	0.96462	0.99999	21161	0	0.035444	0.08356	0.959427	1868	2
KIR3DL2	3	0.85052	0.85101	0.99999	18643	0	0.035489	0.083662	0.959427	1869	1
STAG2	3	0.95062	0.95074	0.99999	20807	0	0.0355	0.083686	0.959427	1870	3
KIF16B	3	0.9645	0.96456	0.99999	21160	0	0.035503	0.083691	0.959427	1871	3
MB	3	0.68211	0.70995	0.99999	15593	1	0.03551	0.083707	0.959427	1872	2
PDK3	3	0.9639	0.96397	0.99999	21137	0	0.035519	0.083729	0.959427	1873	3
EXOSC5	3	0.032095	0.077136	0.976877	1721	2	0.035535	0.083757	0.959427	1874	1
PCCB	3	0.66493	0.69814	0.99999	15350	1	0.035547	0.083789	0.959427	1875	2
KCNG1	3	0.96445	0.96451	0.99999	21158	0	0.035548	0.08379	0.959427	1876	3
MIPEP	3	0.96445	0.96451	0.99999	21157	0	0.035553	0.083801	0.959427	1877	3
PLAG1	3	0.96444	0.9645	0.99999	21156	0	0.035563	0.083819	0.959427	1878	3
SLC22A7	3	0.40123	0.53986	0.997981	11878	1	0.035566	0.083826	0.959427	1879	2
OR13C2	3	0.96442	0.96448	0.99999	21155	0	0.035584	0.083863	0.959427	1880	3
PRKACG	3	0.9644	0.96446	0.99999	21154	0	0.035599	0.083891	0.959427	1881	3
UGT1A1	1	0.96438	0.96444	0.99999	21153	0	0.03562	0.083932	0.959427	1882	1
PTPRH	3	0.056766	0.12871	0.976877	2877	1	0.035626	0.083946	0.959427	1883	2
KCNJ8	3	0.96434	0.96441	0.99999	21152	0	0.03566	0.084008	0.959427	1884	3
COQ3	3	0.89209	0.89211	0.99999	19512	0	0.03566	0.084009	0.959427	1885	2
EEF1G	3	0.90716	0.90718	0.99999	19836	0	0.035672	0.084037	0.959427	1886	1
CRIP1	3	0.96432	0.96439	0.99999	21151	0	0.03568	0.084058	0.959427	1887	3
C6orf118	3	0.85849	0.85887	0.99999	18800	0	0.035689	0.084073	0.959427	1888	2
ABHD2	3	0.52679	0.61241	0.99999	13463	1	0.035708	0.084118	0.959427	1889	2
NonTargetingControlGuideForHuman_0804	1	0.96429	0.96435	0.99999	21150	0	0.035714	0.084131	0.959427	1890	1
NHLH1	3	0.96428	0.96435	0.99999	21149	0	0.035716	0.084135	0.959427	1891	3
PROP1	3	0.037411	0.088822	0.976877	1971	2	0.035718	0.084138	0.959427	1892	1
MUCL1	3	0.96425	0.96432	0.99999	21148	0	0.035746	0.084195	0.959427	1893	3
MTPN	3	0.50127	0.59761	0.99999	13154	1	0.035755	0.084212	0.959427	1894	2
UBL4A	3	0.37165	0.5087	0.997908	11218	1	0.035764	0.084232	0.959427	1895	2
USP42	3	0.2629	0.39187	0.997908	8585	1	0.035809	0.084325	0.959427	1896	2
FKBP10	3	0.33615	0.47092	0.997908	10354	2	0.035855	0.084421	0.959427	1897	1
CHTOP	3	0.96412	0.96418	0.99999	21145	0	0.035884	0.084487	0.959427	1898	3
AQP2	3	0.067518	0.15006	0.976877	3363	2	0.035901	0.08452	0.959427	1899	1
POM121L12	3	0.9641	0.96416	0.99999	21144	0	0.035904	0.084529	0.959427	1900	3
TCN1	3	0.76588	0.77305	0.99999	16948	1	0.035906	0.084532	0.959427	1901	2
PIGL	3	0.57178	0.63937	0.99999	14072	1	0.035925	0.084563	0.959427	1902	2
SYN1	3	0.96406	0.96413	0.99999	21143	0	0.035935	0.084582	0.959427	1903	3
POTEM;POTEJ;POTEI;POTEH;POTEG;POTEF;POTEE	1	0.96404	0.96409	0.99999	21142	0	0.035964	0.084648	0.959427	1904	1
CRB1	3	0.69495	0.71897	0.99999	15779	1	0.035991	0.084705	0.959427	1905	2
OR10X1	3	0.96399	0.96405	0.99999	21140	0	0.036012	0.084754	0.959427	1906	3
PRND	3	0.96398	0.96404	0.99999	21139	0	0.036022	0.084777	0.959427	1907	3
CA12	3	0.87449	0.87474	0.99999	19142	0	0.036029	0.084792	0.959427	1908	2
CPNE3	3	0.035076	0.083772	0.976877	1864	1	0.036038	0.084813	0.959427	1909	2
NonTargetingControlGuideForHuman_0207	1	0.96396	0.96402	0.99999	21138	0	0.036042	0.084819	0.959427	1910	1
hsa-mir-3191;hsa-mir-3190	4	0.97256	0.97274	0.99999	21387	0	0.036075	0.08489	0.959427	1911	3
ARMC4	3	0.37155	0.50859	0.997908	11214	1	0.036084	0.08491	0.959427	1912	2
CREB3L3	3	0.95034	0.95043	0.99999	20796	0	0.03613	0.084999	0.959427	1913	3
CNOT1	3	0.96386	0.96393	0.99999	21136	0	0.03614	0.085022	0.959427	1914	3
NCK2	3	0.96383	0.9639	0.99999	21135	0	0.036171	0.085089	0.959427	1915	3
FAM209B	3	0.96379	0.96386	0.99999	21134	0	0.036212	0.085181	0.959427	1916	3
PLIN3	3	0.7745	0.78019	0.99999	17097	1	0.036221	0.085206	0.959427	1917	2
ASB4	3	0.57245	0.63978	0.99999	14083	1	0.036267	0.085302	0.959427	1918	2
TUB	3	0.18238	0.30106	0.995468	6652	2	0.036267	0.085303	0.959427	1919	1
TEC	3	0.96371	0.96379	0.99999	21133	0	0.036289	0.085345	0.959427	1920	3
TMEM51	3	0.96371	0.96378	0.99999	21132	0	0.036294	0.085355	0.959427	1921	3
hsa-mir-32	2	0.96369	0.96377	0.99999	21131	0	0.036309	0.085398	0.959427	1922	2
LRRC25	3	0.06509	0.1453	0.976877	3258	1	0.036313	0.085405	0.959427	1923	2
EDAR	3	0.80579	0.80776	0.99999	17683	1	0.036359	0.085506	0.959427	1924	2
ADAM28	3	0.569	0.63768	0.99999	14034	1	0.036371	0.085541	0.959427	1925	2
LCN12	3	0.54075	0.62056	0.99999	13650	1	0.036381	0.085562	0.959427	1926	2
GMNC	3	0.30126	0.4336	0.997908	9528	1	0.036405	0.085613	0.959427	1927	1
MLST8	3	0.4522	0.57022	0.997981	12577	1	0.036409	0.08562	0.959427	1928	2
QRICH1	3	0.96355	0.96362	0.99999	21129	0	0.036454	0.085712	0.959427	1929	3
ZNF214	3	0.83685	0.83764	0.99999	18345	0	0.036476	0.085752	0.959427	1930	2
C18orf32	3	0.96351	0.96359	0.99999	21127	0	0.03649	0.085775	0.959427	1931	3
SPACA3	3	0.96346	0.96353	0.99999	21126	0	0.036541	0.085895	0.959427	1932	3
C20orf195	3	0.56847	0.63736	0.99999	14026	1	0.036542	0.085897	0.959427	1933	1
GM2A	3	0.96342	0.96349	0.99999	21125	0	0.036583	0.085987	0.959427	1934	3
MIF4GD	3	0.38833	0.52625	0.997981	11596	2	0.036588	0.085992	0.959427	1935	1
NPBWR2	3	0.61609	0.66667	0.99999	14651	1	0.03659	0.085996	0.959427	1936	2
MT4	3	0.67617	0.70589	0.99999	15513	1	0.03661	0.086033	0.959427	1937	2
C12orf23	3	0.96339	0.96346	0.99999	21124	0	0.036614	0.086043	0.959427	1938	3
TRIB1	3	0.40545	0.54435	0.997981	11981	1	0.036633	0.086083	0.959427	1939	1
SPANXA2;SPANXA1	1	0.96335	0.96343	0.99999	21122	0	0.036652	0.086115	0.959427	1940	1
ZNF420	3	0.96333	0.96341	0.99999	21121	0	0.036671	0.086158	0.959427	1941	3
KAZALD1	3	0.96035	0.96047	0.99999	21022	0	0.036676	0.086168	0.959427	1942	3
ZNF572	3	0.63454	0.67817	0.99999	14901	1	0.036695	0.086212	0.959427	1943	2
C5AR1	3	0.96329	0.96338	0.99999	21119	0	0.036707	0.086234	0.959427	1944	3
MLLT4	3	0.037274	0.088519	0.976877	1967	2	0.036725	0.086268	0.959427	1945	1
MYO5C	3	0.96325	0.96333	0.99999	21118	0	0.036754	0.086336	0.959427	1946	3
ADSL	3	0.96323	0.96331	0.99999	21117	0	0.036769	0.086366	0.959427	1947	3
SLC7A7	3	0.29582	0.42774	0.997908	9395	1	0.036771	0.086369	0.959427	1948	1
CEP250	3	0.66697	0.69955	0.99999	15378	1	0.036772	0.086373	0.959427	1949	2
SIN3A	3	0.79936	0.80193	0.99999	17550	1	0.036782	0.086394	0.959427	1950	2
OR2D3	3	0.96321	0.96329	0.99999	21116	0	0.03679	0.086415	0.959427	1951	3
DMAP1	3	0.14766	0.25968	0.992833	5748	2	0.036816	0.086478	0.959427	1952	1
KIR3DL1	3	0.96318	0.96325	0.99999	21114	0	0.036821	0.086487	0.959427	1953	3
PYY	3	0.69705	0.72044	0.99999	15809	1	0.036908	0.086665	0.959427	1954	1
PROX2	3	0.84289	0.84351	0.99999	18481	0	0.036954	0.086763	0.959427	1955	1
SORD	3	0.74523	0.75651	0.99999	16576	1	0.036973	0.086804	0.959427	1956	2
TNFSF10	3	0.96302	0.96311	0.99999	21111	0	0.036977	0.086813	0.959427	1957	3
USH1G	3	0.96302	0.9631	0.99999	21110	0	0.036982	0.086824	0.959427	1958	3
POU3F1	3	0.58372	0.64678	0.99999	14228	1	0.036999	0.086853	0.959427	1959	1
MAGEA2B	1	0.96299	0.96308	0.99999	21108	0	0.037012	0.086884	0.959427	1960	1
LRRC49	3	0.9539	0.95403	0.99999	20867	0	0.037045	0.086955	0.959427	1961	3
LNPEP	3	0.96292	0.96301	0.99999	21107	0	0.037081	0.087031	0.959427	1962	3
SPTBN5	3	0.35877	0.49518	0.997908	10902	2	0.037091	0.087049	0.959427	1963	1
CERS3	3	0.28334	0.41413	0.997908	9095	1	0.037127	0.087136	0.959427	1964	2
RYR3	3	0.96287	0.96296	0.99999	21105	0	0.037128	0.087139	0.959427	1965	3
CUL4B	3	0.43027	0.55844	0.997981	12286	1	0.037175	0.087242	0.959427	1966	2
BOLA2B;BOLA2	3	0.26215	0.39103	0.997908	8562	2	0.037182	0.087257	0.959427	1967	1
GABPB2	3	0.94942	0.94955	0.99999	20764	0	0.037213	0.087314	0.959427	1968	3
MAGEE1	3	0.88917	0.88914	0.99999	19434	0	0.037228	0.087351	0.959427	1969	1
PDCD6IP	3	0.96274	0.96283	0.99999	21104	0	0.037264	0.087428	0.959427	1970	3
RAVER1	3	0.96268	0.96278	0.99999	21101	0	0.037317	0.08755	0.959427	1971	3
AQP4	3	0.79785	0.8006	0.99999	17515	1	0.03732	0.087557	0.959427	1972	1
GGN	3	0.96266	0.96276	0.99999	21099	0	0.037338	0.087597	0.959427	1973	3
GJA5	3	0.96265	0.96274	0.99999	21097	0	0.037353	0.087623	0.959427	1974	3
PIK3C2G	3	0.56884	0.63759	0.99999	14030	1	0.037365	0.087651	0.959427	1975	1
FPR2	3	0.76347	0.77097	0.99999	16906	1	0.037406	0.087736	0.959427	1976	2
PRSS54	3	0.20332	0.32547	0.997217	7181	1	0.037411	0.087749	0.959427	1977	1
TRIP13	3	0.96258	0.96269	0.99999	21096	0	0.037416	0.087758	0.959427	1978	3
HIP1	3	0.65531	0.69165	0.99999	15205	1	0.037457	0.087844	0.959427	1979	1
SCN9A	3	0.51492	0.60548	0.99999	13313	1	0.037483	0.087902	0.959427	1980	2
TOX3	3	0.96251	0.96261	0.99999	21095	0	0.03749	0.087915	0.959427	1981	3
CD180	3	0.9625	0.9626	0.99999	21094	0	0.037495	0.087927	0.959427	1982	3
MRPL19	3	0.74674	0.75765	0.99999	16605	1	0.037503	0.087938	0.959427	1983	2
SMARCD2	3	0.96248	0.96258	0.99999	21093	0	0.037516	0.087967	0.959427	1984	3
hsa-mir-604	4	0.51619	0.60619	0.99999	13329	2	0.037528	0.087992	0.959427	1985	1
ZNF778	3	0.73373	0.74758	0.99999	16386	1	0.037541	0.088024	0.959427	1986	2
ANAPC15	3	0.96246	0.96256	0.99999	21092	0	0.037542	0.088028	0.959427	1987	3
RPL26	3	0.2663	0.39553	0.997908	8671	1	0.037548	0.088045	0.959427	1988	2
NonTargetingControlGuideForHuman_0369	1	0.96244	0.96254	0.99999	21091	0	0.037559	0.088066	0.959427	1989	1
RABGAP1L	3	0.96242	0.96252	0.99999	21089	0	0.037585	0.088123	0.959427	1990	3
IGSF9	3	0.11141	0.21558	0.987037	4806	2	0.037594	0.088145	0.959427	1991	1
XDH	3	0.010729	0.027617	0.961145	606	1	0.037599	0.088156	0.959427	1992	2
OTOS	3	0.7078	0.72819	0.99999	15978	1	0.037657	0.088279	0.959427	1993	2
PRAMEF18	2	0.76009	0.76827	0.99999	16851	0	0.037659	0.088284	0.959427	1994	1
SGPP1	3	0.73632	0.74958	0.99999	16429	1	0.037676	0.088322	0.959427	1995	2
POU6F1	3	0.33656	0.47137	0.997908	10360	1	0.037686	0.088334	0.959427	1996	2
TRIM50	3	0.96231	0.96242	0.99999	21088	0	0.03769	0.088348	0.959427	1997	3
LARP1B	3	0.96229	0.96239	0.99999	21087	0	0.037711	0.088393	0.959427	1998	3
[truncated: 20,023 more rows]
