# Supplementary material for: TLE3 loss confers AR inhibitor resistance by facilitating GR-mediated human prostate cancer cell growth
Source: eLife. 2019 Dec 19;8:e47430. doi: 10.7554/eLife.47430 (PMC6968917; doi:10.7554/eLife.47430)
Supplement: Figure 2—source data 1. — The normalized readcounts (transcripts) for each gene are shown for control and TLE3KO cells treated with vehicle or 10 μM enzalutamide for 5 days. [file elife-47430-fig2-data1.xlsx]

## Sheet: Readcounts RNA-seq 
Figure 2-source data 1: Readcounts RNA-seq for control and TLE3KO cells treated with vehicle or 10 uM enzalutamide for 5 days
ensembl_gene_id	4970_1_gNT_UT_R1_ACTGATA	4970_2_gNT_UT_R2_ATTCCTT	4970_3_gNT_UT_R3_CGATGTA	4970_4_gNT_Enza_R1_TGACCAA	4970_5_gNT_Enza_R2_ACAGTGA	4970_6_gNT_Enza_R3_GCCAATA	4970_7_gTLE3_UT_R1_CAGATCA	4970_8_gTLE3_UT_R2_CTTGTAA	4970_9_gTLE3_UT_R3_AGTCAAC	4970_10_gTLE3_Enza_R1_AGTTCCG	4970_11_gTLE3_Enza_R2_ATGTCAG	4970_12_gTLE3_Enza_R3_CCGTCCC	gene_biotype	chromosome_name	start_position	end_position	external_gene_id	description
ENSG00000000457	206	232	324	362	309	415	206	181	250	214	288	294	protein_coding	1	169849631	169894267	SCYL3	SCY1-like 3 (S. cerevisiae) [Source:HGNC Symbol;Acc:HGNC:19285]
ENSG00000000460	590	623	718	566	566	667	491	449	609	368	465	470	protein_coding	1	169662007	169854080	C1orf112	chromosome 1 open reading frame 112 [Source:HGNC Symbol;Acc:HGNC:25565]
ENSG00000000938	0	0	0	0	0	0	0	0	0	0	0	1	protein_coding	1	27612064	27635277	FGR	FGR proto-oncogene, Src family tyrosine kinase [Source:HGNC Symbol;Acc:HGNC:3697]
ENSG00000000971	0	0	0	0	1	0	0	0	0	0	0	0	protein_coding	1	196651878	196747504	CFH	complement factor H [Source:HGNC Symbol;Acc:HGNC:4883]
ENSG00000001460	144	134	174	160	128	146	111	101	123	92	111	128	protein_coding	1	24356999	24416934	STPG1	sperm-tail PG-rich repeat containing 1 [Source:HGNC Symbol;Acc:HGNC:28070]
ENSG00000001461	1189	1139	1355	2093	2008	2568	911	851	1071	1018	1279	1260	protein_coding	1	24415794	24472976	NIPAL3	NIPA-like domain containing 3 [Source:HGNC Symbol;Acc:HGNC:25233]
ENSG00000004455	3986	4030	5128	3088	2846	3330	3450	3327	4258	1867	2468	2438	protein_coding	1	33007984	33080996	AK2	adenylate kinase 2 [Source:HGNC Symbol;Acc:HGNC:362]
ENSG00000004487	2482	2546	3134	2344	2032	2484	2303	2137	2737	1566	2154	2080	protein_coding	1	23019448	23083689	KDM1A	lysine (K)-specific demethylase 1A [Source:HGNC Symbol;Acc:HGNC:29079]
ENSG00000006555	3	1	3	0	0	0	0	1	0	1	2	1	protein_coding	1	54779712	54801267	TTC22	tetratricopeptide repeat domain 22 [Source:HGNC Symbol;Acc:HGNC:26067]
ENSG00000007341	473	475	630	490	521	601	361	350	445	269	331	381	protein_coding	1	112523518	112620825	ST7L	suppression of tumorigenicity 7 like [Source:HGNC Symbol;Acc:HGNC:18441]
ENSG00000007908	0	0	0	1	1	1	2	0	0	0	2	2	protein_coding	1	169722641	169764705	SELE	selectin E [Source:HGNC Symbol;Acc:HGNC:10718]
ENSG00000007923	2650	2712	3486	2022	1901	2352	2289	2081	2786	1307	1740	1685	protein_coding	1	6634168	6701924	DNAJC11	DnaJ (Hsp40) homolog, subfamily C, member 11 [Source:HGNC Symbol;Acc:HGNC:25570]
ENSG00000007933	1	0	0	0	0	0	0	0	0	0	0	0	protein_coding	1	171090877	171117819	FMO3	flavin containing monooxygenase 3 [Source:HGNC Symbol;Acc:HGNC:3771]
ENSG00000007968	594	614	720	474	418	505	488	403	556	266	396	363	protein_coding	1	23506430	23531220	E2F2	E2F transcription factor 2 [Source:HGNC Symbol;Acc:HGNC:3114]
ENSG00000008118	0	2	2	3	0	1	0	0	2	1	2	0	protein_coding	1	209583717	209613938	CAMK1G	calcium/calmodulin-dependent protein kinase IG [Source:HGNC Symbol;Acc:HGNC:14585]
ENSG00000008128	85	84	87	95	92	122	75	49	77	41	60	84	protein_coding	1	1702730	1724324	CDK11A	cyclin-dependent kinase 11A [Source:HGNC Symbol;Acc:HGNC:1730]
ENSG00000008130	2408	2548	3150	1894	1871	2064	2087	1812	2340	1154	1664	1512	protein_coding	1	1751232	1780457	NADK	NAD kinase [Source:HGNC Symbol;Acc:HGNC:29831]
ENSG00000009307	18846	19016	24050	17767	15936	21009	17626	15792	20104	11269	15219	14641	protein_coding	1	114716913	114758676	CSDE1	cold shock domain containing E1, RNA-binding [Source:HGNC Symbol;Acc:HGNC:29905]
ENSG00000009709	0	0	0	2	0	0	0	0	1	0	0	0	protein_coding	1	18631006	18748866	PAX7	paired box 7 [Source:HGNC Symbol;Acc:HGNC:8621]
ENSG00000009724	7	3	4	4	3	7	4	7	4	0	2	6	protein_coding	1	11026523	11047233	MASP2	mannan-binding lectin serine peptidase 2 [Source:HGNC Symbol;Acc:HGNC:6902]
ENSG00000009780	233	224	260	217	208	267	209	162	252	121	172	169	protein_coding	1	27725979	27763122	FAM76A	family with sequence similarity 76, member A [Source:HGNC Symbol;Acc:HGNC:28530]
ENSG00000010072	446	447	548	511	432	555	401	361	481	308	430	450	protein_coding	1	231337104	231355023	SPRTN	SprT-like N-terminal domain [Source:HGNC Symbol;Acc:HGNC:25356]
ENSG00000010165	1424	1458	1729	1211	1195	1452	1229	1095	1467	771	993	953	protein_coding	1	171781664	171814023	METTL13	methyltransferase like 13 [Source:HGNC Symbol;Acc:HGNC:24248]
ENSG00000010803	2108	2104	2647	2220	2141	2527	1703	1573	2005	1300	1829	1717	protein_coding	1	41027200	41242154	SCMH1	sex comb on midleg homolog 1 (Drosophila) [Source:HGNC Symbol;Acc:HGNC:19003]
ENSG00000011007	1683	1775	2144	1436	1306	1626	1431	1386	1815	834	1093	1116	protein_coding	1	23743155	23762059	TCEB3	transcription elongation factor B (SIII), polypeptide 3 (110kDa, elongin A) [Source:HGNC Symbol;Acc:HGNC:11620]
ENSG00000011009	720	693	861	575	578	663	554	562	711	340	538	471	protein_coding	1	23790970	23795539	LYPLA2	lysophospholipase II [Source:HGNC Symbol;Acc:HGNC:6738]
ENSG00000011021	314	333	455	353	354	380	260	254	336	193	304	280	protein_coding	1	11806096	11843144	CLCN6	chloride channel, voltage-sensitive 6 [Source:HGNC Symbol;Acc:HGNC:2024]
ENSG00000014914	74	102	117	163	160	187	71	65	98	75	120	116	protein_coding	1	149928651	149936898	MTMR11	myotubularin related protein 11 [Source:HGNC Symbol;Acc:HGNC:24307]
ENSG00000018625	2	2	2	0	1	0	1	0	5	0	0	0	protein_coding	1	160115759	160143591	ATP1A2	ATPase, Na+/K+ transporting, alpha 2 polypeptide [Source:HGNC Symbol;Acc:HGNC:800]
ENSG00000020129	910	923	1101	1152	1126	1262	663	588	775	525	739	713	protein_coding	1	35557473	35567274	NCDN	neurochondrin [Source:HGNC Symbol;Acc:HGNC:17597]
ENSG00000020633	0	0	0	4	1	4	0	0	0	0	2	0	protein_coding	1	24899511	24965121	RUNX3	runt-related transcription factor 3 [Source:HGNC Symbol;Acc:HGNC:10473]
ENSG00000023572	532	540	718	198	188	265	526	437	662	130	196	179	protein_coding	1	193096468	193106114	GLRX2	glutaredoxin 2 [Source:HGNC Symbol;Acc:HGNC:16065]
ENSG00000023902	42	67	60	78	62	82	55	44	54	43	64	72	protein_coding	1	150149183	150164720	PLEKHO1	pleckstrin homology domain containing, family O member 1 [Source:HGNC Symbol;Acc:HGNC:24310]
ENSG00000023909	1268	1269	1600	969	828	1070	1024	977	1216	632	848	778	protein_coding	1	93885205	93909456	GCLM	glutamate-cysteine ligase, modifier subunit [Source:HGNC Symbol;Acc:HGNC:4312]
ENSG00000024526	1148	1160	1425	604	529	690	961	824	1127	419	583	560	protein_coding	1	68474152	68497221	DEPDC1	DEP domain containing 1 [Source:HGNC Symbol;Acc:HGNC:22949]
ENSG00000025800	2827	2865	3588	2905	2646	3224	2366	2220	2777	1875	2477	2184	protein_coding	1	32108038	32176568	KPNA6	karyopherin alpha 6 (importin alpha 7) [Source:HGNC Symbol;Acc:HGNC:6399]
ENSG00000026751	0	0	0	0	1	0	0	0	0	0	0	0	protein_coding	1	160739057	160754821	SLAMF7	SLAM family member 7 [Source:HGNC Symbol;Acc:HGNC:21394]
ENSG00000027869	5	2	9	6	8	5	5	2	6	8	6	5	protein_coding	1	156806243	156816862	SH2D2A	SH2 domain containing 2A [Source:HGNC Symbol;Acc:HGNC:10821]
ENSG00000028137	3	4	1	7	3	4	3	2	1	3	3	3	protein_coding	1	12167003	12209228	TNFRSF1B	tumor necrosis factor receptor superfamily, member 1B [Source:HGNC Symbol;Acc:HGNC:11917]
ENSG00000031698	5900	5923	7713	4060	3676	4399	4980	4586	5995	2938	4091	3755	protein_coding	1	109213918	109238169	SARS	seryl-tRNA synthetase [Source:HGNC Symbol;Acc:HGNC:10537]
ENSG00000033122	4	7	6	8	3	4	7	2	1	2	5	7	protein_coding	1	69568398	70151945	LRRC7	leucine rich repeat containing 7 [Source:HGNC Symbol;Acc:HGNC:18531]
ENSG00000035687	1106	1166	1507	1000	942	1127	1075	981	1195	653	946	892	protein_coding	1	244408494	244452134	ADSS	adenylosuccinate synthase [Source:HGNC Symbol;Acc:HGNC:292]
ENSG00000036549	1531	1572	2031	1613	1495	2016	1376	1195	1542	1131	1473	1403	protein_coding	1	77562416	77683419	ZZZ3	zinc finger, ZZ-type containing 3 [Source:HGNC Symbol;Acc:HGNC:24523]
ENSG00000037637	720	781	944	806	723	852	584	578	698	452	607	511	protein_coding	1	16246839	16352454	FBXO42	F-box protein 42 [Source:HGNC Symbol;Acc:HGNC:29249]
ENSG00000040487	160	152	178	145	133	161	83	87	125	73	100	96	protein_coding	1	19312326	19329300	PQLC2	PQ loop repeat containing 2 [Source:HGNC Symbol;Acc:HGNC:26001]
ENSG00000041988	301	287	349	339	327	361	214	211	274	203	300	252	protein_coding	1	6624866	6635586	THAP3	THAP domain containing, apoptosis associated protein 3 [Source:HGNC Symbol;Acc:HGNC:20855]
ENSG00000042781	1	5	5	1	1	0	2	5	1	0	1	0	protein_coding	1	215622894	216423396	USH2A	Usher syndrome 2A (autosomal recessive, mild) [Source:HGNC Symbol;Acc:HGNC:12601]
ENSG00000043514	854	836	1087	680	676	766	799	699	902	478	698	635	protein_coding	1	39841022	39883511	TRIT1	tRNA isopentenyltransferase 1 [Source:HGNC Symbol;Acc:HGNC:20286]
ENSG00000047410	4681	4916	6112	5193	4509	5724	4382	4143	4998	3674	5086	4675	protein_coding	1	186311652	186375693	TPR	translocated promoter region, nuclear basket protein [Source:HGNC Symbol;Acc:HGNC:12017]
ENSG00000048707	2019	2097	2669	2398	2163	2796	1647	1672	1897	1634	2127	2094	protein_coding	1	12230067	12512047	VPS13D	vacuolar protein sorting 13 homolog D (S. cerevisiae) [Source:HGNC Symbol;Acc:HGNC:23595]
ENSG00000049089	151	119	180	187	169	226	110	118	136	123	159	172	protein_coding	1	40300487	40317816	COL9A2	collagen, type IX, alpha 2 [Source:HGNC Symbol;Acc:HGNC:2218]
ENSG00000049239	2073	2131	2640	2405	2127	2525	1854	1773	2084	1623	2248	2112	protein_coding	1	9234775	9271337	H6PD	hexose-6-phosphate dehydrogenase (glucose 1-dehydrogenase) [Source:HGNC Symbol;Acc:HGNC:4795]
ENSG00000049245	1766	1799	2184	1743	1563	2009	1489	1353	1785	1039	1348	1331	protein_coding	1	7771269	7781432	VAMP3	vesicle-associated membrane protein 3 [Source:HGNC Symbol;Acc:HGNC:12644]
ENSG00000049246	1303	1305	1576	1436	1385	1659	1059	941	1242	1043	1450	1334	protein_coding	1	7784320	7845177	PER3	period circadian clock 3 [Source:HGNC Symbol;Acc:HGNC:8847]
ENSG00000049247	0	1	0	2	0	2	0	1	0	2	1	1	protein_coding	1	7843083	7853512	UTS2	urotensin 2 [Source:HGNC Symbol;Acc:HGNC:12636]
ENSG00000049249	6	1	2	0	0	0	1	3	4	1	2	0	protein_coding	1	7915894	7943165	TNFRSF9	tumor necrosis factor receptor superfamily, member 9 [Source:HGNC Symbol;Acc:HGNC:11924]
ENSG00000050628	1	1	1	10	9	9	1	1	3	7	9	7	protein_coding	1	70852353	71047808	PTGER3	prostaglandin E receptor 3 (subtype EP3) [Source:HGNC Symbol;Acc:HGNC:9595]
ENSG00000052723	1610	1710	2070	1682	1497	1946	1445	1214	1625	1079	1468	1360	protein_coding	1	114769479	114780685	SIKE1	suppressor of IKBKE 1 [Source:HGNC Symbol;Acc:HGNC:26119]
ENSG00000053371	428	444	574	601	522	620	371	363	404	287	397	399	protein_coding	1	19303965	19312146	AKR7A2	aldo-keto reductase family 7, member A2 (aflatoxin aldehyde reductase) [Source:HGNC Symbol;Acc:HGNC:389]
ENSG00000053372	884	881	1093	640	605	782	751	657	940	419	572	554	protein_coding	1	19251539	19260128	MRTO4	mRNA turnover 4 homolog (S. cerevisiae) [Source:HGNC Symbol;Acc:HGNC:18477]
ENSG00000054116	1169	1237	1490	1172	1135	1408	1025	870	1300	650	958	909	protein_coding	1	36136570	36156053	TRAPPC3	trafficking protein particle complex 3 [Source:HGNC Symbol;Acc:HGNC:19942]
ENSG00000054118	6646	7097	9022	6647	5800	6994	5721	5634	7214	3958	5621	5394	protein_coding	1	36224416	36305357	THRAP3	thyroid hormone receptor associated protein 3 [Source:HGNC Symbol;Acc:HGNC:22964]
ENSG00000054267	977	1047	1380	1160	1007	1354	886	801	1027	689	842	869	protein_coding	1	235131634	235328219	ARID4B	AT rich interactive domain 4B (RBP1-like) [Source:HGNC Symbol;Acc:HGNC:15550]
ENSG00000054277	20	13	24	31	22	29	14	25	24	25	32	38	protein_coding	1	241590102	241677376	OPN3	opsin 3 [Source:HGNC Symbol;Acc:HGNC:14007]
ENSG00000054282	456	506	599	452	416	575	407	364	468	291	371	372	protein_coding	1	243256034	243500092	SDCCAG8	serologically defined colon cancer antigen 8 [Source:HGNC Symbol;Acc:HGNC:10671]
ENSG00000054392	3	8	9	10	8	11	8	9	9	5	16	13	protein_coding	1	210328252	210676296	HHAT	hedgehog acyltransferase [Source:HGNC Symbol;Acc:HGNC:18270]
ENSG00000054523	3148	3327	4282	3979	3461	4434	2800	2685	3258	2575	3260	3081	protein_coding	1	10210805	10381603	KIF1B	kinesin family member 1B [Source:HGNC Symbol;Acc:HGNC:16636]
ENSG00000055070	2800	2712	3456	2763	2605	3089	2455	2131	2826	1745	2340	2214	protein_coding	1	16352575	16398145	SZRD1	SUZ RNA binding domain containing 1 [Source:HGNC Symbol;Acc:HGNC:30232]
ENSG00000057252	2617	2689	3328	1012	903	1192	2166	1996	2597	662	940	862	protein_coding	1	179293714	179358680	SOAT1	sterol O-acyltransferase 1 [Source:HGNC Symbol;Acc:HGNC:11177]
ENSG00000057468	15	24	22	24	20	10	23	16	16	5	12	13	protein_coding	1	75796882	75913238	MSH4	mutS homolog 4 [Source:HGNC Symbol;Acc:HGNC:7327]
ENSG00000057757	990	1014	1229	838	745	848	832	799	1016	463	589	556	protein_coding	1	23778405	23788232	PITHD1	PITH (C-terminal proteasome-interacting domain of thioredoxin-like) domain containing 1 [Source:HGNC Symbol;Acc:HGNC:25022]
ENSG00000058085	2	2	0	0	1	1	1	1	2	1	1	3	protein_coding	1	183186238	183244900	LAMC2	laminin, gamma 2 [Source:HGNC Symbol;Acc:HGNC:6493]
ENSG00000058453	292	331	365	410	386	417	201	230	252	183	309	322	protein_coding	1	16740273	16972979	CROCC	ciliary rootlet coiled-coil, rootletin [Source:HGNC Symbol;Acc:HGNC:21299]
ENSG00000058668	2167	2300	2798	2676	2378	3158	1917	1788	2199	1747	2484	2264	protein_coding	1	203626561	203744081	ATP2B4	ATPase, Ca++ transporting, plasma membrane 4 [Source:HGNC Symbol;Acc:HGNC:817]
ENSG00000058673	3780	3936	5041	5249	4629	5808	3239	3123	3875	3271	4603	4429	protein_coding	1	203795654	203854124	ZC3H11A	zinc finger CCCH-type containing 11A [Source:HGNC Symbol;Acc:HGNC:29093]
ENSG00000058799	613	626	850	587	512	662	593	523	684	343	534	484	protein_coding	1	53851719	53889834	YIPF1	Yip1 domain family, member 1 [Source:HGNC Symbol;Acc:HGNC:25231]
ENSG00000058804	3611	3489	4376	2581	2442	3251	3243	2907	3688	1961	2556	2477	protein_coding	1	53765460	53838860	NDC1	NDC1 transmembrane nucleoporin [Source:HGNC Symbol;Acc:HGNC:25525]
ENSG00000059588	1251	1282	1499	1298	1276	1504	1321	1127	1466	1067	1504	1476	protein_coding	1	234391313	234479103	TARBP1	TAR (HIV-1) RNA binding protein 1 [Source:HGNC Symbol;Acc:HGNC:11568]
ENSG00000060642	576	491	612	568	534	645	393	360	481	330	488	448	protein_coding	1	26787472	26798398	PIGV	phosphatidylinositol glycan anchor biosynthesis, class V [Source:HGNC Symbol;Acc:HGNC:26031]
ENSG00000060656	640	660	835	931	838	981	556	468	551	468	609	578	protein_coding	1	29236516	29326813	PTPRU	protein tyrosine phosphatase, receptor type, U [Source:HGNC Symbol;Acc:HGNC:9683]
ENSG00000060688	1995	2085	2531	1160	1044	1317	1717	1686	2128	780	1086	1044	protein_coding	1	31259568	31296782	SNRNP40	small nuclear ribonucleoprotein 40kDa (U5) [Source:HGNC Symbol;Acc:HGNC:30857]
ENSG00000060718	0	0	0	0	0	0	0	1	0	0	0	1	protein_coding	1	102876467	103108496	COL11A1	collagen, type XI, alpha 1 [Source:HGNC Symbol;Acc:HGNC:2186]
ENSG00000064703	613	643	844	680	569	673	550	507	657	400	551	527	protein_coding	1	111755245	111768016	DDX20	DEAD (Asp-Glu-Ala-Asp) box polypeptide 20 [Source:HGNC Symbol;Acc:HGNC:2743]
ENSG00000065135	2561	2718	3235	2294	2143	2719	2345	1978	2642	1317	1719	1685	protein_coding	1	109548611	109618321	GNAI3	guanine nucleotide binding protein (G protein), alpha inhibiting activity polypeptide 3 [Source:HGNC Symbol;Acc:HGNC:4387]
ENSG00000065183	2939	3014	3677	2313	2059	2714	2558	2267	3116	1491	2066	1868	protein_coding	1	117929720	117966542	WDR3	WD repeat domain 3 [Source:HGNC Symbol;Acc:HGNC:12755]
ENSG00000065243	1624	1659	2066	1864	1621	2037	1505	1340	1675	1114	1403	1509	protein_coding	1	88684222	88836255	PKN2	protein kinase N2 [Source:HGNC Symbol;Acc:HGNC:9406]
ENSG00000065526	2357	2321	3141	2791	2406	2918	1890	1920	2219	1556	2163	2068	protein_coding	1	15847864	15940460	SPEN	spen family transcriptional repressor [Source:HGNC Symbol;Acc:HGNC:17575]
ENSG00000065600	356	343	440	315	278	307	305	296	371	215	293	259	protein_coding	1	212363931	212414901	TMEM206	transmembrane protein 206 [Source:HGNC Symbol;Acc:HGNC:25593]
ENSG00000065978	15101	15258	19727	14063	13012	16557	14943	14453	17412	9830	13316	13006	protein_coding	1	42682395	42702349	YBX1	Y box binding protein 1 [Source:HGNC Symbol;Acc:HGNC:8014]
ENSG00000066027	740	762	939	1059	961	1178	703	610	814	632	899	847	protein_coding	1	212285537	212361863	PPP2R5A	protein phosphatase 2, regulatory subunit B', alpha [Source:HGNC Symbol;Acc:HGNC:9309]
ENSG00000066135	1970	1967	2469	2653	2393	2939	1528	1465	1874	1675	2262	2197	protein_coding	1	43650158	43705515	KDM4A	lysine (K)-specific demethylase 4A [Source:HGNC Symbol;Acc:HGNC:22978]
ENSG00000066136	1158	1142	1458	1223	1159	1326	1002	969	1263	700	950	955	protein_coding	1	40691570	40771603	NFYC	nuclear transcription factor Y, gamma [Source:HGNC Symbol;Acc:HGNC:7806]
ENSG00000066185	61	58	90	127	108	152	76	59	68	77	98	96	protein_coding	1	42430329	42456267	ZMYND12	zinc finger, MYND-type containing 12 [Source:HGNC Symbol;Acc:HGNC:21192]
ENSG00000066279	1901	2102	2566	1807	1664	2165	1853	1594	1990	1487	1899	1755	protein_coding	1	197084128	197146694	ASPM	asp (abnormal spindle) homolog, microcephaly associated (Drosophila) [Source:HGNC Symbol;Acc:HGNC:19048]
ENSG00000066294	0	0	0	0	0	1	1	0	0	0	0	0	protein_coding	1	160541095	160579516	CD84	CD84 molecule [Source:HGNC Symbol;Acc:HGNC:1704]
ENSG00000066322	2604	2628	3333	2217	2089	2593	2104	1882	2454	1121	1591	1480	protein_coding	1	43363397	43368074	ELOVL1	ELOVL fatty acid elongase 1 [Source:HGNC Symbol;Acc:HGNC:14418]
ENSG00000066557	939	979	1252	1012	860	1110	918	839	1059	637	887	860	protein_coding	1	70144805	70205620	LRRC40	leucine rich repeat containing 40 [Source:HGNC Symbol;Acc:HGNC:26004]
ENSG00000067208	887	1027	1192	934	854	1100	810	720	994	563	787	736	protein_coding	1	92508696	92792404	EVI5	ecotropic viral integration site 5 [Source:HGNC Symbol;Acc:HGNC:3501]
ENSG00000067334	2139	2145	2741	1673	1581	1976	2015	1799	2336	980	1303	1363	protein_coding	1	93866283	93879918	DNTTIP2	deoxynucleotidyltransferase, terminal, interacting protein 2 [Source:HGNC Symbol;Acc:HGNC:24013]
ENSG00000067533	1016	930	1189	684	640	801	886	825	1086	442	593	590	protein_coding	1	218285287	218337983	RRP15	ribosomal RNA processing 15 homolog (S. cerevisiae) [Source:HGNC Symbol;Acc:HGNC:24255]
ENSG00000067606	693	726	952	944	844	1064	584	522	694	483	735	713	protein_coding	1	2050470	2185395	PRKCZ	protein kinase C, zeta [Source:HGNC Symbol;Acc:HGNC:9412]
ENSG00000067704	5840	5797	7344	5281	4786	5917	5316	4867	6072	3555	4726	4611	protein_coding	1	220094102	220148041	IARS2	isoleucyl-tRNA synthetase 2, mitochondrial [Source:HGNC Symbol;Acc:HGNC:29685]
ENSG00000069248	2239	2258	2738	1985	1792	2233	1929	1732	2299	1326	1829	1653	protein_coding	1	229440260	229508341	NUP133	nucleoporin 133kDa [Source:HGNC Symbol;Acc:HGNC:18016]
ENSG00000069275	14270	14615	18081	15270	13565	17936	12794	11785	15037	10535	13731	13258	protein_coding	1	205712819	205750276	NUCKS1	nuclear casein kinase and cyclin-dependent kinase substrate 1 [Source:HGNC Symbol;Acc:HGNC:29923]
ENSG00000069424	666	675	871	801	778	870	685	574	718	539	689	638	protein_coding	1	5991466	6101193	KCNAB2	potassium voltage-gated channel, shaker-related subfamily, beta member 2 [Source:HGNC Symbol;Acc:HGNC:6229]
ENSG00000069702	362	343	436	338	285	364	358	298	375	249	320	331	protein_coding	1	91680343	91906335	TGFBR3	transforming growth factor, beta receptor III [Source:HGNC Symbol;Acc:HGNC:11774]
ENSG00000069712	151	160	182	243	210	258	148	135	142	143	203	199	protein_coding	1	92167052	92184723	KIAA1107	KIAA1107 [Source:HGNC Symbol;Acc:HGNC:29192]
ENSG00000069812	22	24	22	8	8	11	15	8	19	6	9	9	protein_coding	1	6412418	6424670	HES2	hes family bHLH transcription factor 2 [Source:HGNC Symbol;Acc:HGNC:16005]
ENSG00000070759	172	192	204	405	339	450	139	138	167	154	253	229	protein_coding	1	45343883	45491166	TESK2	testis-specific kinase 2 [Source:HGNC Symbol;Acc:HGNC:11732]
ENSG00000070785	579	602	761	512	466	616	558	468	617	323	393	421	protein_coding	1	44850522	44986722	EIF2B3	eukaryotic translation initiation factor 2B, subunit 3 gamma, 58kDa [Source:HGNC Symbol;Acc:HGNC:3259]
ENSG00000070831	2606	2630	3170	2789	2549	3136	2347	2146	2700	1734	2345	2251	protein_coding	1	22052627	22092946	CDC42	cell division cycle 42 [Source:HGNC Symbol;Acc:HGNC:1736]
ENSG00000070886	0	1	1	1	0	1	1	2	0	0	2	0	protein_coding	1	22563564	22603594	EPHA8	EPH receptor A8 [Source:HGNC Symbol;Acc:HGNC:3391]
ENSG00000074800	29939	29858	37054	25984	24764	30545	28781	27193	33034	17506	23834	25816	protein_coding	1	8861002	8879249	ENO1	enolase 1, (alpha) [Source:HGNC Symbol;Acc:HGNC:3350]
ENSG00000074964	209	199	252	289	287	331	161	149	199	179	235	221	protein_coding	1	17539835	17697874	ARHGEF10L	Rho guanine nucleotide exchange factor (GEF) 10-like [Source:HGNC Symbol;Acc:HGNC:25540]
ENSG00000075151	2376	2387	3191	3091	2722	3374	2020	1982	2465	1827	2595	2431	protein_coding	1	20806292	21176888	EIF4G3	eukaryotic translation initiation factor 4 gamma, 3 [Source:HGNC Symbol;Acc:HGNC:3298]
ENSG00000075391	501	502	656	744	657	845	488	441	565	555	743	740	protein_coding	1	178094141	178484147	RASAL2	RAS protein activator like 2 [Source:HGNC Symbol;Acc:HGNC:9874]
ENSG00000075945	782	782	930	728	660	843	578	603	743	426	576	542	protein_coding	1	169921326	170085208	KIFAP3	kinesin-associated protein 3 [Source:HGNC Symbol;Acc:HGNC:17060]
ENSG00000076258	35	40	56	55	44	45	28	23	32	23	24	38	protein_coding	1	171314208	171342084	FMO4	flavin containing monooxygenase 4 [Source:HGNC Symbol;Acc:HGNC:3772]
ENSG00000076321	608	682	835	646	592	769	509	439	602	339	448	472	protein_coding	1	173714941	173786702	KLHL20	kelch-like family member 20 [Source:HGNC Symbol;Acc:HGNC:25056]
ENSG00000076356	109	115	154	146	115	145	174	159	193	129	175	168	protein_coding	1	208022242	208244320	PLXNA2	plexin A2 [Source:HGNC Symbol;Acc:HGNC:9100]
ENSG00000076864	550	563	742	512	450	524	511	492	657	284	445	434	protein_coding	1	21596215	21669363	RAP1GAP	RAP1 GTPase activating protein [Source:HGNC Symbol;Acc:HGNC:9858]
ENSG00000077152	2034	2097	2679	1748	1674	1981	1819	1713	2303	1156	1545	1499	protein_coding	1	202331657	202341980	UBE2T	ubiquitin-conjugating enzyme E2T (putative) [Source:HGNC Symbol;Acc:HGNC:25009]
ENSG00000077157	751	792	1004	685	650	762	642	612	704	375	530	569	protein_coding	1	202348699	202592706	PPP1R12B	protein phosphatase 1, regulatory subunit 12B [Source:HGNC Symbol;Acc:HGNC:7619]
ENSG00000077254	1777	1898	2431	1782	1496	2099	1593	1426	1890	1049	1482	1447	protein_coding	1	77695987	77759852	USP33	ubiquitin specific peptidase 33 [Source:HGNC Symbol;Acc:HGNC:20059]
ENSG00000077522	1	0	1	1	0	0	2	0	0	0	0	0	protein_coding	1	236686454	236764631	ACTN2	actinin, alpha 2 [Source:HGNC Symbol;Acc:HGNC:164]
ENSG00000077549	2341	2330	2791	1842	1658	2248	2029	1924	2424	1209	1556	1404	protein_coding	1	19338776	19485539	CAPZB	capping protein (actin filament) muscle Z-line, beta [Source:HGNC Symbol;Acc:HGNC:1491]
ENSG00000077585	218	235	291	647	573	721	265	225	279	368	471	480	protein_coding	1	236142505	236221865	GPR137B	G protein-coupled receptor 137B [Source:HGNC Symbol;Acc:HGNC:11862]
ENSG00000078369	8822	8803	11181	12684	11524	14394	7766	7212	9180	7571	10628	10181	protein_coding	1	1785285	1891117	GNB1	guanine nucleotide binding protein (G protein), beta polypeptide 1 [Source:HGNC Symbol;Acc:HGNC:4396]
ENSG00000078618	3225	3340	3979	3151	2960	3683	2863	2482	3232	1792	2476	2370	protein_coding	1	51789191	51878937	NRD1	nardilysin (N-arginine dibasic convertase) [Source:HGNC Symbol;Acc:HGNC:7995]
ENSG00000078808	3196	3271	4082	3692	3397	3867	2740	2600	3287	1975	3030	2998	protein_coding	1	1216908	1232031	SDF4	stromal cell derived factor 4 [Source:HGNC Symbol;Acc:HGNC:24188]
ENSG00000078900	90	116	129	142	112	145	95	51	106	71	105	111	protein_coding	1	3652520	3736201	TP73	tumor protein p73 [Source:HGNC Symbol;Acc:HGNC:12003]
ENSG00000079277	580	493	646	694	683	758	431	382	498	334	456	461	protein_coding	1	46557408	46616843	MKNK1	MAP kinase interacting serine/threonine kinase 1 [Source:HGNC Symbol;Acc:HGNC:7110]
ENSG00000079335	272	267	335	168	155	176	326	315	362	244	332	363	protein_coding	1	100351734	100520277	CDC14A	cell division cycle 14A [Source:HGNC Symbol;Acc:HGNC:1718]
ENSG00000079739	1207	1116	1469	1284	1233	1456	1137	944	1231	703	1036	967	protein_coding	1	63593276	63660245	PGM1	phosphoglucomutase 1 [Source:HGNC Symbol;Acc:HGNC:8905]
ENSG00000080947	44	48	62	104	103	137	46	35	38	49	75	74	transcribed_unprocessed_pseudogene	1	16467436	16499257	CROCCP3	ciliary rootlet coiled-coil, rootletin pseudogene 3 [Source:HGNC Symbol;Acc:HGNC:29405]
ENSG00000081019	571	586	678	733	639	886	439	480	551	478	690	685	protein_coding	1	113761832	113812476	RSBN1	round spermatid basic protein 1 [Source:HGNC Symbol;Acc:HGNC:25642]
ENSG00000081026	478	489	697	924	834	1155	475	440	533	635	839	826	protein_coding	1	113390749	113685923	MAGI3	membrane associated guanylate kinase, WW and PDZ domain containing 3 [Source:HGNC Symbol;Acc:HGNC:29647]
ENSG00000081237	0	0	0	3	2	5	0	0	0	6	4	6	protein_coding	1	198638671	198757283	PTPRC	protein tyrosine phosphatase, receptor type, C [Source:HGNC Symbol;Acc:HGNC:9666]
ENSG00000081248	1	1	0	1	1	2	0	0	0	1	2	2	protein_coding	1	201039512	201112566	CACNA1S	calcium channel, voltage-dependent, L type, alpha 1S subunit [Source:HGNC Symbol;Acc:HGNC:1397]
ENSG00000081277	48	39	68	2	2	1	34	32	68	0	0	0	protein_coding	1	201283452	201332993	PKP1	plakophilin 1 [Source:HGNC Symbol;Acc:HGNC:9023]
ENSG00000081692	843	833	1020	644	662	719	722	604	853	364	449	496	protein_coding	1	227730425	227735411	JMJD4	jumonji domain containing 4 [Source:HGNC Symbol;Acc:HGNC:25724]
ENSG00000081721	454	464	610	408	399	435	393	378	524	267	358	350	protein_coding	1	161749758	161757238	DUSP12	dual specificity phosphatase 12 [Source:HGNC Symbol;Acc:HGNC:3067]
ENSG00000081870	942	933	1179	988	863	1011	814	716	983	574	815	743	protein_coding	1	53916574	53945929	HSPB11	heat shock protein family B (small), member 11 [Source:HGNC Symbol;Acc:HGNC:25019]
ENSG00000081985	0	0	0	0	0	0	0	0	0	1	0	0	protein_coding	1	67307364	67396900	IL12RB2	interleukin 12 receptor, beta 2 [Source:HGNC Symbol;Acc:HGNC:5972]
ENSG00000082497	2	2	4	0	3	1	4	2	2	4	5	3	protein_coding	1	210232799	210246631	SERTAD4	SERTA domain containing 4 [Source:HGNC Symbol;Acc:HGNC:25236]
ENSG00000082512	136	149	190	144	127	161	166	135	166	106	122	134	protein_coding	1	211326615	211374946	TRAF5	TNF receptor-associated factor 5 [Source:HGNC Symbol;Acc:HGNC:12035]
ENSG00000083444	2746	2844	3540	3299	3133	3705	2579	2507	3080	1864	2820	2919	protein_coding	1	11934205	11975538	PLOD1	procollagen-lysine, 2-oxoglutarate 5-dioxygenase 1 [Source:HGNC Symbol;Acc:HGNC:9081]
ENSG00000084070	1936	1946	2399	1862	1731	2039	1763	1611	1997	1159	1550	1506	protein_coding	1	40344850	40423326	SMAP2	small ArfGAP2 [Source:HGNC Symbol;Acc:HGNC:25082]
ENSG00000084072	1005	948	1195	1066	942	1143	832	780	1004	688	923	865	protein_coding	1	39692182	39763914	PPIE	peptidylprolyl isomerase E (cyclophilin E) [Source:HGNC Symbol;Acc:HGNC:9258]
ENSG00000084073	2716	2835	3472	3103	2834	3761	2504	2338	2905	1845	2447	2418	protein_coding	1	40258107	40294184	ZMPSTE24	zinc metallopeptidase STE24 [Source:HGNC Symbol;Acc:HGNC:12877]
ENSG00000084623	6471	6510	8230	4129	3938	4888	5607	5291	6474	2447	3366	3087	protein_coding	1	32221928	32231604	EIF3I	eukaryotic translation initiation factor 3, subunit I [Source:HGNC Symbol;Acc:HGNC:3272]
ENSG00000084628	6	9	5	0	0	2	9	7	9	1	2	0	protein_coding	1	31179745	31239554	NKAIN1	Na+/K+ transporting ATPase interacting 1 [Source:HGNC Symbol;Acc:HGNC:25743]
ENSG00000084636	43	31	37	132	129	139	41	40	42	115	196	153	protein_coding	1	31652247	31704319	COL16A1	collagen, type XVI, alpha 1 [Source:HGNC Symbol;Acc:HGNC:2193]
ENSG00000084652	3901	4018	4974	3982	3696	4471	3107	2993	3921	2380	3050	2993	protein_coding	1	32179686	32198285	TXLNA	taxilin alpha [Source:HGNC Symbol;Acc:HGNC:30685]
ENSG00000085433	380	365	453	385	402	530	296	277	394	238	297	311	protein_coding	1	108970214	109042113	WDR47	WD repeat domain 47 [Source:HGNC Symbol;Acc:HGNC:29141]
ENSG00000085465	306	323	429	147	168	188	286	283	325	116	198	164	protein_coding	1	111414314	111427777	OVGP1	oviductal glycoprotein 1, 120kDa [Source:HGNC Symbol;Acc:HGNC:8524]
ENSG00000085491	489	529	629	756	677	803	554	482	630	441	612	580	protein_coding	1	108134036	108200849	SLC25A24	solute carrier family 25 (mitochondrial carrier; phosphate carrier), member 24 [Source:HGNC Symbol;Acc:HGNC:20662]
ENSG00000085552	522	493	637	613	670	666	382	360	445	378	534	524	protein_coding	1	159927039	159945604	IGSF9	immunoglobulin superfamily, member 9 [Source:HGNC Symbol;Acc:HGNC:18132]
ENSG00000085831	382	348	481	286	285	353	322	300	370	178	214	219	protein_coding	1	51287258	51345116	TTC39A	tetratricopeptide repeat domain 39A [Source:HGNC Symbol;Acc:HGNC:18657]
ENSG00000085832	3053	3146	3842	2048	1875	2350	2396	2365	2910	1294	1637	1583	protein_coding	1	51354263	51519328	EPS15	epidermal growth factor receptor pathway substrate 15 [Source:HGNC Symbol;Acc:HGNC:3419]
ENSG00000085840	926	942	1182	723	658	831	794	737	912	433	545	559	protein_coding	1	52372829	52404459	ORC1	origin recognition complex, subunit 1 [Source:HGNC Symbol;Acc:HGNC:8487]
ENSG00000085998	2435	2641	3269	2934	2832	3352	2196	1964	2444	1805	2409	2351	protein_coding	1	46188682	46220305	POMGNT1	protein O-linked mannose N-acetylglucosaminyltransferase 1 (beta 1,2-) [Source:HGNC Symbol;Acc:HGNC:19139]
ENSG00000085999	1200	1267	1474	1041	1047	1177	1117	1002	1304	710	969	961	protein_coding	1	46247688	46278473	RAD54L	RAD54-like (S. cerevisiae) [Source:HGNC Symbol;Acc:HGNC:9826]
ENSG00000086015	896	898	1098	1080	1054	1231	797	731	993	674	967	956	protein_coding	1	45786987	46036124	MAST2	microtubule associated serine/threonine kinase 2 [Source:HGNC Symbol;Acc:HGNC:19035]
ENSG00000086619	244	240	312	482	426	518	314	281	332	325	470	410	protein_coding	1	236215555	236281985	ERO1LB	ERO1-like beta (S. cerevisiae) [Source:HGNC Symbol;Acc:HGNC:14355]
ENSG00000088035	766	734	935	820	802	977	709	724	856	511	720	695	protein_coding	1	63367590	63438562	ALG6	ALG6, alpha-1,3-glucosyltransferase [Source:HGNC Symbol;Acc:HGNC:23157]
ENSG00000088280	325	296	418	467	427	523	267	240	292	262	380	333	protein_coding	1	23428563	23484568	ASAP3	ArfGAP with SH3 domain, ankyrin repeat and PH domain 3 [Source:HGNC Symbol;Acc:HGNC:14987]
ENSG00000090020	1293	1274	1684	2223	2061	2465	1026	986	1215	1134	1578	1627	protein_coding	1	27098815	27166981	SLC9A1	solute carrier family 9, subfamily A (NHE1, cation proton antiporter 1), member 1 [Source:HGNC Symbol;Acc:HGNC:11071]
ENSG00000090273	3101	3040	3934	2780	2612	3190	2837	2766	3314	1603	2118	2040	protein_coding	1	26900238	26946862	NUDC	nudC nuclear distribution protein [Source:HGNC Symbol;Acc:HGNC:8045]
ENSG00000090432	438	437	555	570	558	656	359	348	461	323	429	379	protein_coding	1	20499448	20508161	MUL1	mitochondrial E3 ubiquitin protein ligase 1 [Source:HGNC Symbol;Acc:HGNC:25762]
ENSG00000090621	4037	4128	5274	3248	3172	3787	3594	3261	4264	1933	2774	2720	protein_coding	1	39560816	39576790	PABPC4	poly(A) binding protein, cytoplasmic 4 (inducible form) [Source:HGNC Symbol;Acc:HGNC:8557]
ENSG00000090686	852	892	1117	979	874	1060	761	735	875	601	813	740	protein_coding	1	21678298	21783606	USP48	ubiquitin specific peptidase 48 [Source:HGNC Symbol;Acc:HGNC:18533]
ENSG00000091483	3768	3829	4545	3239	3068	3807	3460	3034	3978	2218	2774	2816	protein_coding	1	241497603	241519761	FH	fumarate hydratase [Source:HGNC Symbol;Acc:HGNC:3700]
ENSG00000092607	81	71	90	8	6	4	53	62	70	6	10	3	protein_coding	1	118883046	118989556	TBX15	T-box 15 [Source:HGNC Symbol;Acc:HGNC:11594]
ENSG00000092621	16196	16243	19759	14451	14168	17731	13116	11841	15468	10254	13910	12815	protein_coding	1	119659798	119744215	PHGDH	phosphoglycerate dehydrogenase [Source:HGNC Symbol;Acc:HGNC:8923]
ENSG00000092847	2184	2237	2594	2140	1959	2665	1913	1712	2175	1409	1927	1763	protein_coding	1	35869808	35929610	AGO1	argonaute RISC catalytic component 1 [Source:HGNC Symbol;Acc:HGNC:3262]
ENSG00000092850	0	1	0	1	0	1	2	1	0	0	0	0	protein_coding	1	36084075	36088275	TEKT2	tektin 2 (testicular) [Source:HGNC Symbol;Acc:HGNC:11725]
ENSG00000092853	1369	1464	1750	955	864	1158	1092	1062	1289	535	732	703	protein_coding	1	35720218	35769967	CLSPN	claspin [Source:HGNC Symbol;Acc:HGNC:19715]
ENSG00000092969	0	0	1	3	2	3	1	1	1	1	1	0	protein_coding	1	218346235	218444619	TGFB2	transforming growth factor, beta 2 [Source:HGNC Symbol;Acc:HGNC:11768]
ENSG00000092978	637	636	789	872	813	1022	554	490	659	568	752	728	protein_coding	1	217426992	217631082	GPATCH2	G patch domain containing 2 [Source:HGNC Symbol;Acc:HGNC:25499]
ENSG00000094975	2418	2602	3109	2312	2056	2737	2324	2073	2809	1528	1905	1930	protein_coding	1	172532349	172611833	SUCO	SUN domain containing ossification factor [Source:HGNC Symbol;Acc:HGNC:1240]
ENSG00000097021	1190	1109	1544	1165	1112	1340	1050	980	1175	717	958	927	protein_coding	1	6264269	6394391	ACOT7	acyl-CoA thioesterase 7 [Source:HGNC Symbol;Acc:HGNC:24157]
ENSG00000097033	735	718	902	827	725	904	744	661	798	501	673	669	protein_coding	1	86704570	86748184	SH3GLB1	SH3-domain GRB2-like endophilin B1 [Source:HGNC Symbol;Acc:HGNC:10833]
ENSG00000097046	1538	1559	1971	1515	1342	1762	1384	1194	1682	900	1295	1230	protein_coding	1	91500893	91525764	CDC7	cell division cycle 7 [Source:HGNC Symbol;Acc:HGNC:1745]
ENSG00000097096	23	26	36	53	25	54	35	38	48	56	55	65	protein_coding	1	85156873	85201046	SYDE2	synapse defective 1, Rho GTPase, homolog 2 (C. elegans) [Source:HGNC Symbol;Acc:HGNC:25841]
ENSG00000099260	124	137	205	82	63	90	93	109	117	71	72	92	protein_coding	1	99645943	99694541	PALMD	palmdelphin [Source:HGNC Symbol;Acc:HGNC:15846]
ENSG00000107404	2320	2363	3090	2763	2695	2859	1979	1694	2349	1672	2452	2225	protein_coding	1	1335276	1349350	DVL1	dishevelled segment polarity protein 1 [Source:HGNC Symbol;Acc:HGNC:3084]
ENSG00000116128	1321	1321	1767	1856	1614	1923	1083	1056	1276	1036	1563	1422	protein_coding	1	147541412	147626216	BCL9	B-cell CLL/lymphoma 9 [Source:HGNC Symbol;Acc:HGNC:1008]
ENSG00000116133	20378	21104	25476	7738	7148	8892	17598	16158	20593	4506	5875	5719	protein_coding	1	54849633	54887218	DHCR24	24-dehydrocholesterol reductase [Source:HGNC Symbol;Acc:HGNC:2859]
ENSG00000116138	789	810	964	863	818	1019	606	607	734	527	673	691	protein_coding	1	15526813	15592379	DNAJC16	DnaJ (Hsp40) homolog, subfamily C, member 16 [Source:HGNC Symbol;Acc:HGNC:29157]
ENSG00000116141	231	247	287	399	341	440	185	202	238	274	405	365	protein_coding	1	220528183	220664461	MARK1	MAP/microtubule affinity-regulating kinase 1 [Source:HGNC Symbol;Acc:HGNC:6896]
ENSG00000116151	274	333	424	297	286	301	221	201	272	181	226	197	protein_coding	1	2321253	2391707	MORN1	MORN repeat containing 1 [Source:HGNC Symbol;Acc:HGNC:25852]
ENSG00000116157	0	0	0	0	0	0	1	0	0	0	0	1	protein_coding	1	52602372	52609051	GPX7	glutathione peroxidase 7 [Source:HGNC Symbol;Acc:HGNC:4559]
ENSG00000116161	2693	2523	3168	2234	2100	2575	2406	2100	2715	1348	1720	1762	protein_coding	1	174999163	175011715	CACYBP	calcyclin binding protein [Source:HGNC Symbol;Acc:HGNC:30423]
ENSG00000116171	2593	2581	3272	3100	2904	3588	2268	2167	2745	1862	2525	2311	protein_coding	1	52927229	53051703	SCP2	sterol carrier protein 2 [Source:HGNC Symbol;Acc:HGNC:10606]
ENSG00000116183	2	1	2	1	1	2	7	4	8	7	7	9	protein_coding	1	176463171	176845605	PAPPA2	pappalysin 2 [Source:HGNC Symbol;Acc:HGNC:14615]
ENSG00000116191	601	636	754	735	659	853	608	521	690	589	748	737	protein_coding	1	178725147	178921841	RALGPS2	Ral GEF with PH domain and SH3 binding motif 2 [Source:HGNC Symbol;Acc:HGNC:30279]
ENSG00000116198	1193	1236	1561	1064	996	1237	945	977	1184	640	951	873	protein_coding	1	3812081	3857214	CEP104	centrosomal protein 104kDa [Source:HGNC Symbol;Acc:HGNC:24866]
ENSG00000116199	2280	2189	2791	2308	2184	2735	1926	1754	2272	1577	2097	1999	protein_coding	1	179025804	179076562	FAM20B	family with sequence similarity 20, member B [Source:HGNC Symbol;Acc:HGNC:23017]
ENSG00000116205	371	393	487	433	382	441	352	332	390	281	381	355	protein_coding	1	54053587	54112519	TCEANC2	transcription elongation factor A (SII) N-terminal and central domain containing 2 [Source:HGNC Symbol;Acc:HGNC:26494]
ENSG00000116209	2029	2054	2501	3642	3454	4446	1800	1489	2125	2034	2799	2519	protein_coding	1	54031663	54053504	TMEM59	transmembrane protein 59 [Source:HGNC Symbol;Acc:HGNC:1239]
ENSG00000116212	788	742	897	946	868	1044	662	578	784	593	769	758	protein_coding	1	53946077	53968168	LRRC42	leucine rich repeat containing 42 [Source:HGNC Symbol;Acc:HGNC:28792]
ENSG00000116213	551	532	680	606	549	583	477	426	551	351	535	475	protein_coding	1	3630767	3652761	WRAP73	WD repeat containing, antisense to TP73 [Source:HGNC Symbol;Acc:HGNC:12759]
ENSG00000116221	3942	3963	5045	3732	3516	4433	3737	3413	4410	2276	3182	3143	protein_coding	1	54184041	54225464	MRPL37	mitochondrial ribosomal protein L37 [Source:HGNC Symbol;Acc:HGNC:14034]
ENSG00000116237	3725	3862	4661	3490	3096	4031	3272	2896	3702	2067	2843	2700	protein_coding	1	6221193	6235972	ICMT	isoprenylcysteine carboxyl methyltransferase [Source:HGNC Symbol;Acc:HGNC:5350]
ENSG00000116251	5561	5666	7084	6101	5732	7058	4635	4240	5551	3976	5489	4991	protein_coding	1	6181269	6209389	RPL22	ribosomal protein L22 [Source:HGNC Symbol;Acc:HGNC:10315]
ENSG00000116254	30	27	40	47	49	46	17	15	24	13	31	30	protein_coding	1	6101793	6180123	CHD5	chromodomain helicase DNA binding protein 5 [Source:HGNC Symbol;Acc:HGNC:16816]
ENSG00000116260	5555	5393	6898	7981	7580	9501	5781	5296	6957	6943	8993	8521	protein_coding	1	180154834	180204030	QSOX1	quiescin Q6 sulfhydryl oxidase 1 [Source:HGNC Symbol;Acc:HGNC:9756]
ENSG00000116266	1014	1024	1207	1147	1100	1422	908	820	1010	661	870	923	protein_coding	1	108746674	108809526	STXBP3	syntaxin binding protein 3 [Source:HGNC Symbol;Acc:HGNC:11446]
ENSG00000116273	621	579	708	792	707	824	472	510	561	472	656	593	protein_coding	1	6613685	6624033	PHF13	PHD finger protein 13 [Source:HGNC Symbol;Acc:HGNC:22983]
ENSG00000116285	959	1067	1357	572	556	735	796	781	1035	349	461	487	protein_coding	1	8004404	8026308	ERRFI1	ERBB receptor feedback inhibitor 1 [Source:HGNC Symbol;Acc:HGNC:18185]
ENSG00000116288	5132	5331	6523	4710	4580	5204	4746	4089	5400	2829	3840	3493	protein_coding	1	7954291	7985505	PARK7	parkinson protein 7 [Source:HGNC Symbol;Acc:HGNC:16369]
ENSG00000116299	9	5	4	32	24	59	4	7	7	12	20	20	protein_coding	1	109113679	109206781	KIAA1324	KIAA1324 [Source:HGNC Symbol;Acc:HGNC:29618]
ENSG00000116337	1361	1435	1701	1327	1363	1520	1156	1023	1294	743	1135	1096	protein_coding	1	109616104	109632051	AMPD2	adenosine monophosphate deaminase 2 [Source:HGNC Symbol;Acc:HGNC:469]
ENSG00000116350	1373	1374	1855	1638	1462	1741	1268	1288	1557	935	1402	1288	protein_coding	1	29147743	29181987	SRSF4	serine/arginine-rich splicing factor 4 [Source:HGNC Symbol;Acc:HGNC:10786]
ENSG00000116353	623	604	806	704	635	782	500	465	605	420	595	536	protein_coding	1	29192873	29230942	MECR	mitochondrial trans-2-enoyl-CoA reductase [Source:HGNC Symbol;Acc:HGNC:19691]
ENSG00000116396	4	0	1	1	1	1	0	0	2	0	1	0	protein_coding	1	110211343	110283100	KCNC4	potassium voltage-gated channel, Shaw-related subfamily, member 4 [Source:HGNC Symbol;Acc:HGNC:6236]
ENSG00000116406	1734	1617	2103	1317	1189	1618	1646	1577	1929	1007	1357	1217	protein_coding	1	184690231	184754913	EDEM3	ER degradation enhancer, mannosidase alpha-like 3 [Source:HGNC Symbol;Acc:HGNC:16787]
ENSG00000116455	773	783	924	609	555	732	636	522	742	337	451	431	protein_coding	1	111439890	111449376	WDR77	WD repeat domain 77 [Source:HGNC Symbol;Acc:HGNC:29652]
ENSG00000116459	4826	4872	5901	4195	4080	4941	4298	3730	5042	2724	3601	3567	protein_coding	1	111448864	111462773	ATP5F1	ATP synthase, H+ transporting, mitochondrial Fo complex, subunit B1 [Source:HGNC Symbol;Acc:HGNC:840]
ENSG00000116473	827	858	1018	854	755	900	769	661	822	525	658	627	protein_coding	1	111542218	111716691	RAP1A	RAP1A, member of RAS oncogene family [Source:HGNC Symbol;Acc:HGNC:9855]
ENSG00000116478	3135	3159	4105	3424	3137	3797	2764	2447	3328	2056	2701	2589	protein_coding	1	32292086	32333635	HDAC1	histone deacetylase 1 [Source:HGNC Symbol;Acc:HGNC:4852]
ENSG00000116489	5974	5939	7431	5520	5195	6741	5146	4785	6178	3457	4407	4393	protein_coding	1	112619173	112671619	CAPZA1	capping protein (actin filament) muscle Z-line, alpha 1 [Source:HGNC Symbol;Acc:HGNC:1488]
ENSG00000116497	1035	1078	1365	1211	1100	1288	923	793	1067	737	1010	949	protein_coding	1	32816767	32858879	S100PBP	S100P binding protein [Source:HGNC Symbol;Acc:HGNC:25768]
ENSG00000116514	234	198	295	300	251	313	194	188	229	201	211	241	protein_coding	1	32936445	32964685	RNF19B	ring finger protein 19B [Source:HGNC Symbol;Acc:HGNC:26886]
ENSG00000116521	1351	1317	1604	1312	1280	1508	1109	1029	1297	770	1021	1000	protein_coding	1	155255979	155262430	SCAMP3	secretory carrier membrane protein 3 [Source:HGNC Symbol;Acc:HGNC:10565]
ENSG00000116525	252	280	339	351	349	381	197	194	270	200	278	273	protein_coding	1	33145402	33182059	TRIM62	tripartite motif containing 62 [Source:HGNC Symbol;Acc:HGNC:25574]
ENSG00000116539	2321	2246	3037	3542	3121	4081	1821	1792	2090	2084	2736	2750	protein_coding	1	155335268	155562807	ASH1L	ash1 (absent, small, or homeotic)-like (Drosophila) [Source:HGNC Symbol;Acc:HGNC:19088]
ENSG00000116544	1	3	2	2	1	0	1	2	1	1	2	3	protein_coding	1	34865436	34929585	DLGAP3	discs, large (Drosophila) homolog-associated protein 3 [Source:HGNC Symbol;Acc:HGNC:30368]
ENSG00000116560	8880	9056	11525	9409	8822	9935	6559	6339	8325	4854	7158	7378	protein_coding	1	35176378	35193148	SFPQ	splicing factor proline/glutamine-rich [Source:HGNC Symbol;Acc:HGNC:10774]
ENSG00000116574	1188	1364	1632	503	415	593	1379	1326	1754	233	304	303	protein_coding	1	228735077	228746669	RHOU	ras homolog family member U [Source:HGNC Symbol;Acc:HGNC:17794]
ENSG00000116580	1001	1041	1260	1086	1060	1256	836	771	930	665	925	909	protein_coding	1	155749662	155859400	GON4L	gon-4-like (C. elegans) [Source:HGNC Symbol;Acc:HGNC:25973]
ENSG00000116584	544	530	737	907	831	921	490	511	594	667	964	941	protein_coding	1	155946851	156007070	ARHGEF2	Rho/Rac guanine nucleotide exchange factor (GEF) 2 [Source:HGNC Symbol;Acc:HGNC:682]
ENSG00000116586	783	756	958	797	682	871	703	682	867	475	661	620	protein_coding	1	156054752	156058510	LAMTOR2	late endosomal/lysosomal adaptor, MAPK and MTOR activator 2 [Source:HGNC Symbol;Acc:HGNC:29796]
ENSG00000116604	792	814	1053	1018	921	1103	705	623	768	579	878	875	protein_coding	1	156463727	156500828	MEF2D	myocyte enhancer factor 2D [Source:HGNC Symbol;Acc:HGNC:6997]
ENSG00000116641	2559	2628	3211	2575	2218	3019	2270	2011	2619	1606	2126	2035	protein_coding	1	62454728	62688368	DOCK7	dedicator of cytokinesis 7 [Source:HGNC Symbol;Acc:HGNC:19190]
ENSG00000116649	4846	4830	6128	2658	2566	3100	4068	3966	4945	1622	2243	2135	protein_coding	1	11054584	11060024	SRM	spermidine synthase [Source:HGNC Symbol;Acc:HGNC:11296]
ENSG00000116652	17	13	22	17	17	27	21	17	12	13	26	26	sense_intronic	1	63547082	63550636	DLEU2L	deleted in lymphocytic leukemia 2-like [Source:HGNC Symbol;Acc:HGNC:13225]
ENSG00000116661	36	23	66	477	451	480	38	39	47	203	326	308	protein_coding	1	11648367	11655785	FBXO2	F-box protein 2 [Source:HGNC Symbol;Acc:HGNC:13581]
ENSG00000116663	56	60	88	72	75	104	48	33	44	37	49	55	protein_coding	1	11664124	11674354	FBXO6	F-box protein 6 [Source:HGNC Symbol;Acc:HGNC:13585]
ENSG00000116667	1460	1566	2031	1279	1262	1493	1245	1213	1449	859	1142	1098	protein_coding	1	184387058	184629020	C1orf21	chromosome 1 open reading frame 21 [Source:HGNC Symbol;Acc:HGNC:15494]
ENSG00000116668	117	123	184	78	79	102	131	138	156	74	87	85	protein_coding	1	185157080	185291765	SWT1	SWT1 RNA endoribonuclease homolog (S. cerevisiae) [Source:HGNC Symbol;Acc:HGNC:16785]
ENSG00000116670	755	768	935	765	761	861	733	590	803	499	716	668	protein_coding	1	11674480	11691650	MAD2L2	MAD2 mitotic arrest deficient-like 2 (yeast) [Source:HGNC Symbol;Acc:HGNC:6764]
ENSG00000116675	224	204	288	308	300	389	190	187	219	232	286	283	protein_coding	1	65248219	65415869	DNAJC6	DnaJ (Hsp40) homolog, subfamily C, member 6 [Source:HGNC Symbol;Acc:HGNC:15469]
ENSG00000116678	18	51	49	38	35	41	47	43	43	39	48	34	protein_coding	1	65420652	65641559	LEPR	leptin receptor [Source:HGNC Symbol;Acc:HGNC:6554]
ENSG00000116679	1330	1461	1677	1206	1059	1419	1534	1383	1777	1438	1958	1825	protein_coding	1	185296388	185317329	IVNS1ABP	influenza virus NS1A binding protein [Source:HGNC Symbol;Acc:HGNC:16951]
ENSG00000116685	1257	1305	1555	1319	1206	1412	1090	1058	1308	819	1152	1100	protein_coding	1	11919591	11926428	KIAA2013	KIAA2013 [Source:HGNC Symbol;Acc:HGNC:28513]
ENSG00000116688	5748	5797	7334	5206	4702	5923	4922	4414	5838	3026	4043	3834	protein_coding	1	11980181	12013514	MFN2	mitofusin 2 [Source:HGNC Symbol;Acc:HGNC:16877]
ENSG00000116691	494	540	661	567	559	587	423	407	567	340	486	451	protein_coding	1	12019466	12032045	MIIP	migration and invasion inhibitory protein [Source:HGNC Symbol;Acc:HGNC:25715]
ENSG00000116698	2922	2798	3631	2982	2710	3397	2295	2339	2912	1799	2515	2368	protein_coding	1	183472216	183598246	SMG7	SMG7 nonsense mediated mRNA decay factor [Source:HGNC Symbol;Acc:HGNC:16792]
ENSG00000116703	0	0	0	1	0	0	0	1	1	0	0	0	protein_coding	1	186443566	186461122	PDC	phosducin [Source:HGNC Symbol;Acc:HGNC:8759]
ENSG00000116704	0	0	0	0	0	0	0	0	0	1	1	0	protein_coding	1	66999332	67054099	SLC35D1	solute carrier family 35 (UDP-GlcA/UDP-GalNAc transporter), member D1 [Source:HGNC Symbol;Acc:HGNC:20800]
ENSG00000116711	15	13	22	18	22	12	34	47	50	32	34	39	protein_coding	1	186828953	186988981	PLA2G4A	phospholipase A2, group IVA (cytosolic, calcium-dependent) [Source:HGNC Symbol;Acc:HGNC:9035]
ENSG00000116717	236	243	288	253	221	252	189	183	205	188	238	249	protein_coding	1	67685061	67688338	GADD45A	growth arrest and DNA-damage-inducible, alpha [Source:HGNC Symbol;Acc:HGNC:4095]
ENSG00000116721	0	0	0	0	0	0	0	0	0	0	1	1	protein_coding	1	12791397	12796628	PRAMEF1	PRAME family member 1 [Source:HGNC Symbol;Acc:HGNC:28840]
ENSG00000116726	1	1	3	1	1	3	0	0	0	0	2	0	protein_coding	1	12774841	12777906	PRAMEF12	PRAME family member 12 [Source:HGNC Symbol;Acc:HGNC:22125]
ENSG00000116729	410	371	470	761	715	935	377	320	405	501	684	601	protein_coding	1	68098473	68233120	WLS	wntless Wnt ligand secretion mediator [Source:HGNC Symbol;Acc:HGNC:30238]
ENSG00000116731	1089	1131	1431	1184	1057	1237	932	861	1229	740	1073	1043	protein_coding	1	13700198	13825079	PRDM2	PR domain containing 2, with ZNF domain [Source:HGNC Symbol;Acc:HGNC:9347]
ENSG00000116741	0	3	0	0	0	0	1	2	4	1	3	0	protein_coding	1	192809039	192812283	RGS2	regulator of G-protein signaling 2 [Source:HGNC Symbol;Acc:HGNC:9998]
ENSG00000116745	0	0	0	0	1	1	0	0	0	0	0	0	protein_coding	1	68428822	68449959	RPE65	retinal pigment epithelium-specific protein 65kDa [Source:HGNC Symbol;Acc:HGNC:10294]
ENSG00000116747	1444	1495	1855	1280	1104	1464	1380	1283	1619	864	1187	1221	protein_coding	1	193059422	193091777	TROVE2	TROVE domain family, member 2 [Source:HGNC Symbol;Acc:HGNC:11313]
ENSG00000116748	0	1	0	0	1	0	1	0	0	0	0	0	protein_coding	1	114673098	114695618	AMPD1	adenosine monophosphate deaminase 1 [Source:HGNC Symbol;Acc:HGNC:468]
ENSG00000116750	1676	1643	2094	1025	881	1221	1780	1608	2047	886	1126	1145	protein_coding	1	193012250	193060080	UCHL5	ubiquitin carboxyl-terminal hydrolase L5 [Source:HGNC Symbol;Acc:HGNC:19678]
ENSG00000116752	1204	1260	1537	1077	998	1245	1093	929	1262	557	818	762	protein_coding	1	114567557	114581639	BCAS2	breast carcinoma amplified sequence 2 [Source:HGNC Symbol;Acc:HGNC:975]
ENSG00000116754	4581	4724	5693	5654	5205	6188	3993	3644	4699	3093	4665	4442	protein_coding	1	70205682	70253052	SRSF11	serine/arginine-rich splicing factor 11 [Source:HGNC Symbol;Acc:HGNC:10782]
ENSG00000116761	285	314	358	172	147	168	233	251	342	148	188	185	protein_coding	1	70411218	70439851	CTH	cystathionine gamma-lyase [Source:HGNC Symbol;Acc:HGNC:2501]
ENSG00000116771	0	0	0	0	0	0	0	0	1	0	0	1	protein_coding	1	15572353	15585110	AGMAT	agmatine ureohydrolase (agmatinase) [Source:HGNC Symbol;Acc:HGNC:18407]
ENSG00000116774	0	1	0	0	0	1	1	0	0	0	0	1	protein_coding	1	113979391	113982254	OLFML3	olfactomedin-like 3 [Source:HGNC Symbol;Acc:HGNC:24956]
ENSG00000116785	0	0	1	0	0	0	2	0	0	0	2	0	protein_coding	1	196774795	196795406	CFHR3	complement factor H-related 3 [Source:HGNC Symbol;Acc:HGNC:16980]
ENSG00000116786	728	777	976	861	761	950	612	585	670	498	695	622	protein_coding	1	15684332	15734769	PLEKHM2	pleckstrin homology domain containing, family M (with RUN domain) member 2 [Source:HGNC Symbol;Acc:HGNC:29131]
ENSG00000116791	554	519	662	588	564	676	523	492	554	384	547	474	protein_coding	1	74705482	74733408	CRYZ	crystallin, zeta (quinone reductase) [Source:HGNC Symbol;Acc:HGNC:2419]
ENSG00000116793	1	0	2	5	6	7	3	2	1	0	5	1	protein_coding	1	113696831	113759489	PHTF1	putative homeodomain transcription factor 1 [Source:HGNC Symbol;Acc:HGNC:8939]
ENSG00000116809	284	284	340	309	308	309	271	258	307	190	254	223	protein_coding	1	15941869	15976132	ZBTB17	zinc finger and BTB domain containing 17 [Source:HGNC Symbol;Acc:HGNC:12936]
ENSG00000116815	104	87	114	139	136	158	107	81	103	72	114	115	protein_coding	1	116514535	116571039	CD58	CD58 molecule [Source:HGNC Symbol;Acc:HGNC:1688]
ENSG00000116819	49	50	76	81	80	95	41	38	54	31	75	61	protein_coding	1	35573370	35595328	TFAP2E	transcription factor AP-2 epsilon (activating enhancer binding protein 2 epsilon) [Source:HGNC Symbol;Acc:HGNC:30774]
ENSG00000116830	1670	1682	2142	1412	1304	1679	1487	1397	1713	951	1300	1228	protein_coding	1	117060303	117107453	TTF2	transcription termination factor, RNA polymerase II [Source:HGNC Symbol;Acc:HGNC:12398]
ENSG00000116833	2	3	3	2	9	11	5	4	8	7	5	9	protein_coding	1	200027602	200177424	NR5A2	nuclear receptor subfamily 5, group A, member 2 [Source:HGNC Symbol;Acc:HGNC:7984]
ENSG00000116852	46	32	41	18	11	18	38	32	39	9	15	14	protein_coding	1	200969390	201023700	KIF21B	kinesin family member 21B [Source:HGNC Symbol;Acc:HGNC:29442]
ENSG00000116857	2359	2378	2793	2585	2533	3025	2000	1756	2332	1629	2230	2008	protein_coding	1	201134772	201171574	TMEM9	transmembrane protein 9 [Source:HGNC Symbol;Acc:HGNC:18823]
ENSG00000116863	707	725	930	624	606	707	616	495	721	345	498	451	protein_coding	1	36088875	36093932	ADPRHL2	ADP-ribosylhydrolase like 2 [Source:HGNC Symbol;Acc:HGNC:21304]
ENSG00000116871	1845	1815	2293	1590	1516	1754	1559	1494	1957	984	1310	1400	protein_coding	1	36155579	36180849	MAP7D1	MAP7 domain containing 1 [Source:HGNC Symbol;Acc:HGNC:25514]
ENSG00000116874	586	573	735	464	443	565	509	450	574	261	388	388	protein_coding	1	119031216	119140671	WARS2	tryptophanyl tRNA synthetase 2, mitochondrial [Source:HGNC Symbol;Acc:HGNC:12730]
ENSG00000116882	1	0	5	0	2	0	1	1	5	2	1	1	protein_coding	1	119368779	119394130	HAO2	hydroxyacid oxidase 2 (long chain) [Source:HGNC Symbol;Acc:HGNC:4810]
ENSG00000116883	41	38	52	19	30	26	25	22	35	16	23	33	antisense	1	36323734	36329221	RP11-268J15.5
ENSG00000116885	251	267	327	352	302	389	241	225	260	199	281	266	protein_coding	1	36415827	36450451	OSCP1	organic solute carrier partner 1 [Source:HGNC Symbol;Acc:HGNC:29971]
ENSG00000116898	2393	2364	3056	1884	1798	2222	2323	2131	2722	1219	1698	1614	protein_coding	1	36455718	36464437	MRPS15	mitochondrial ribosomal protein S15 [Source:HGNC Symbol;Acc:HGNC:14504]
ENSG00000116903	651	620	800	710	628	807	562	510	705	455	583	540	protein_coding	1	231332753	231337852	EXOC8	exocyst complex component 8 [Source:HGNC Symbol;Acc:HGNC:24659]
ENSG00000116906	746	731	875	765	650	895	629	584	734	495	670	636	protein_coding	1	231241207	231277973	GNPAT	glyceronephosphate O-acyltransferase [Source:HGNC Symbol;Acc:HGNC:4416]
ENSG00000116918	1251	1292	1607	1603	1370	1761	1091	1070	1359	985	1238	1254	protein_coding	1	231528653	231566524	TSNAX	translin-associated factor X [Source:HGNC Symbol;Acc:HGNC:12380]
ENSG00000116922	933	935	1231	1008	861	1118	799	708	945	585	811	772	protein_coding	1	37681570	37692249	C1orf109	chromosome 1 open reading frame 109 [Source:HGNC Symbol;Acc:HGNC:26039]
ENSG00000116954	216	227	266	246	219	282	187	176	230	147	187	144	protein_coding	1	38838198	38859823	RRAGC	Ras-related GTP binding C [Source:HGNC Symbol;Acc:HGNC:19902]
ENSG00000116957	658	698	893	682	581	756	693	611	722	369	501	544	protein_coding	1	235367360	235448968	TBCE	tubulin folding cofactor E [Source:HGNC Symbol;Acc:HGNC:11582]
ENSG00000116962	0	0	0	0	1	4	0	0	0	0	0	0	protein_coding	1	235975830	236065162	NID1	nidogen 1 [Source:HGNC Symbol;Acc:HGNC:7821]
ENSG00000116977	918	962	1207	2599	2238	2738	891	947	1079	1476	2285	2251	protein_coding	1	236518000	236552981	LGALS8	lectin, galactoside-binding, soluble, 8 [Source:HGNC Symbol;Acc:HGNC:6569]
ENSG00000116981	0	0	0	0	0	0	0	0	0	2	0	0	protein_coding	1	39659121	39672038	NT5C1A	5'-nucleotidase, cytosolic IA [Source:HGNC Symbol;Acc:HGNC:17819]
ENSG00000116983	34	25	39	66	71	64	40	27	33	43	73	70	protein_coding	1	39678648	39691689	HPCAL4	hippocalcin like 4 [Source:HGNC Symbol;Acc:HGNC:18212]
ENSG00000116984	2273	2450	3001	2002	1871	2260	2008	1906	2393	1323	1894	1771	protein_coding	1	236795281	236903981	MTR	5-methyltetrahydrofolate-homocysteine methyltransferase [Source:HGNC Symbol;Acc:HGNC:7468]
ENSG00000116985	11	10	11	40	45	44	4	9	8	19	35	31	protein_coding	1	39757182	39788861	BMP8B	bone morphogenetic protein 8b [Source:HGNC Symbol;Acc:HGNC:1075]
ENSG00000116990	173	201	246	168	180	200	252	197	205	142	209	202	protein_coding	1	39895426	39902256	MYCL	v-myc avian myelocytomatosis viral oncogene lung carcinoma derived homolog [Source:HGNC Symbol;Acc:HGNC:7555]
ENSG00000116991	662	729	852	235	197	253	856	880	1034	249	325	255	protein_coding	1	232397965	232561558	SIPA1L2	signal-induced proliferation-associated 1 like 2 [Source:HGNC Symbol;Acc:HGNC:23800]
ENSG00000117000	758	653	857	791	714	1016	648	592	723	506	673	673	protein_coding	1	40161373	40240921	RLF	rearranged L-myc fusion [Source:HGNC Symbol;Acc:HGNC:10025]
ENSG00000117010	63	71	94	96	61	87	73	71	79	62	70	70	protein_coding	1	40531561	40548169	ZNF684	zinc finger protein 684 [Source:HGNC Symbol;Acc:HGNC:28418]
ENSG00000117013	293	261	358	207	217	201	229	193	296	142	212	197	protein_coding	1	40784012	40840452	KCNQ4	potassium voltage-gated channel, KQT-like subfamily, member 4 [Source:HGNC Symbol;Acc:HGNC:6298]
ENSG00000117016	96	100	103	215	255	263	100	92	102	168	235	219	protein_coding	1	40620679	40665657	RIMS3	regulating synaptic membrane exocytosis 3 [Source:HGNC Symbol;Acc:HGNC:21292]
ENSG00000117020	1	0	0	0	0	0	0	0	0	0	0	3	protein_coding	1	243488233	243851079	AKT3	v-akt murine thymoma viral oncogene homolog 3 [Source:HGNC Symbol;Acc:HGNC:393]
ENSG00000117036	682	716	923	941	821	1027	594	527	721	533	708	707	protein_coding	1	157121191	157138474	ETV3	ets variant 3 [Source:HGNC Symbol;Acc:HGNC:3492]
ENSG00000117054	2176	2091	2773	2016	1842	2215	1867	1688	2179	1200	1617	1552	protein_coding	1	75724347	75787575	ACADM	acyl-CoA dehydrogenase, C-4 to C-12 straight chain [Source:HGNC Symbol;Acc:HGNC:89]
ENSG00000117069	1	0	2	25	33	24	0	1	4	12	25	24	protein_coding	1	76867441	77065711	ST6GALNAC5	ST6 (alpha-N-acetyl-neuraminyl-2,3-beta-galactosyl-1,3)-N-acetylgalactosaminide alpha-2,6-sialyltransferase 5 [Source:HGNC Symbol;Acc:HGNC:19342]
ENSG00000117114	73	57	93	34	31	31	226	215	226	152	208	201	protein_coding	1	81306160	81992436	LPHN2	latrophilin 2 [Source:HGNC Symbol;Acc:HGNC:18582]
ENSG00000117115	33	43	46	75	88	95	36	39	34	59	87	73	protein_coding	1	17066761	17119435	PADI2	peptidyl arginine deiminase, type II [Source:HGNC Symbol;Acc:HGNC:18341]
ENSG00000117118	1652	1609	2104	1478	1305	1627	1528	1427	1852	1007	1388	1339	protein_coding	1	17018722	17054170	SDHB	succinate dehydrogenase complex, subunit B, iron sulfur (Ip) [Source:HGNC Symbol;Acc:HGNC:10681]
ENSG00000117122	0	0	0	0	0	0	0	0	1	0	0	1	protein_coding	1	16974502	16980835	MFAP2	microfibrillar-associated protein 2 [Source:HGNC Symbol;Acc:HGNC:7033]
ENSG00000117133	1588	1596	2085	1609	1390	1771	1421	1391	1789	1011	1299	1323	protein_coding	1	84479259	84497790	RPF1	ribosome production factor 1 homolog (S. cerevisiae) [Source:HGNC Symbol;Acc:HGNC:30350]
ENSG00000117139	1220	1276	1586	2499	2223	2852	1218	1061	1350	1648	2275	2183	protein_coding	1	202724491	202809470	KDM5B	lysine (K)-specific demethylase 5B [Source:HGNC Symbol;Acc:HGNC:18039]
ENSG00000117143	10430	10667	13034	2938	2771	3437	10193	9025	11909	2193	2878	2782	protein_coding	1	162561506	162599842	UAP1	UDP-N-acetylglucosamine pyrophosphorylase 1 [Source:HGNC Symbol;Acc:HGNC:12457]
ENSG00000117148	13	17	16	4	5	9	21	10	21	5	4	8	protein_coding	1	17755313	17827063	ACTL8	actin-like 8 [Source:HGNC Symbol;Acc:HGNC:24018]
ENSG00000117151	917	905	1140	1231	1081	1280	789	715	894	770	1070	1034	protein_coding	1	84549606	84574480	CTBS	chitobiase, di-N-acetyl- [Source:HGNC Symbol;Acc:HGNC:2496]
ENSG00000117152	8	5	8	0	1	1	5	6	7	1	1	0	protein_coding	1	163068775	163076802	RGS4	regulator of G-protein signaling 4 [Source:HGNC Symbol;Acc:HGNC:10000]
ENSG00000117153	1402	1564	1844	1738	1537	1948	1341	1129	1484	1057	1463	1326	protein_coding	1	202891100	202928636	KLHL12	kelch-like family member 12 [Source:HGNC Symbol;Acc:HGNC:19360]
ENSG00000117154	0	0	0	0	0	0	0	0	0	1	0	0	protein_coding	1	18107746	18378483	IGSF21	immunoglobin superfamily, member 21 [Source:HGNC Symbol;Acc:HGNC:28246]
ENSG00000117155	2699	2731	3404	2891	2663	3519	2543	2291	2928	2099	2595	2580	protein_coding	1	84643707	84690803	SSX2IP	synovial sarcoma, X breakpoint 2 interacting protein [Source:HGNC Symbol;Acc:HGNC:16509]
ENSG00000117174	957	920	1189	949	837	1064	745	739	953	566	759	693	protein_coding	1	85649423	85708433	ZNHIT6	zinc finger, HIT-type containing 6 [Source:HGNC Symbol;Acc:HGNC:26089]
ENSG00000117222	804	814	998	836	721	896	698	590	785	517	684	660	protein_coding	1	205086142	205122015	RBBP5	retinoblastoma binding protein 5 [Source:HGNC Symbol;Acc:HGNC:9888]
ENSG00000117226	1	1	1	16	6	5	3	0	1	5	4	5	protein_coding	1	89006666	89022894	GBP3	guanylate binding protein 3 [Source:HGNC Symbol;Acc:HGNC:4184]
ENSG00000117228	5	5	5	0	0	0	1	1	1	0	0	1	protein_coding	1	89052319	89065360	GBP1	guanylate binding protein 1, interferon-inducible [Source:HGNC Symbol;Acc:HGNC:4182]
ENSG00000117242	306	351	366	243	226	301	249	269	321	141	184	186	antisense	1	20642657	20652193	PINK1-AS	PINK1 antisense RNA [Source:HGNC Symbol;Acc:HGNC:38872]
ENSG00000117245	4	4	3	19	11	14	2	3	3	8	12	8	protein_coding	1	20664014	20718017	KIF17	kinesin family member 17 [Source:HGNC Symbol;Acc:HGNC:19167]
ENSG00000117262	87	82	120	74	82	112	71	72	89	57	78	60	protein_coding	1	145607990	145670648	GPR89A	G protein-coupled receptor 89A [Source:HGNC Symbol;Acc:HGNC:31984]
ENSG00000117266	28	35	42	53	39	40	46	45	48	54	82	89	protein_coding	1	205504595	205532793	CDK18	cyclin-dependent kinase 18 [Source:HGNC Symbol;Acc:HGNC:8751]
ENSG00000117280	1139	1172	1427	1059	927	1210	1131	985	1274	670	959	909	protein_coding	1	205767986	205775460	RAB29	RAB29, member RAS oncogene family [Source:HGNC Symbol;Acc:HGNC:9789]
ENSG00000117298	609	646	879	672	582	741	733	676	797	545	751	797	protein_coding	1	21217247	21345504	ECE1	endothelin converting enzyme 1 [Source:HGNC Symbol;Acc:HGNC:3146]
ENSG00000117305	384	399	452	438	394	514	334	342	407	305	396	397	protein_coding	1	23801885	23838620	HMGCL	3-hydroxymethyl-3-methylglutaryl-CoA lyase [Source:HGNC Symbol;Acc:HGNC:5005]
ENSG00000117308	620	656	779	630	586	649	515	460	597	346	484	421	protein_coding	1	23795599	23800804	GALE	UDP-galactose-4-epimerase [Source:HGNC Symbol;Acc:HGNC:4116]
ENSG00000117318	1184	1182	1524	783	738	907	653	643	889	265	340	382	protein_coding	1	23557918	23559794	ID3	inhibitor of DNA binding 3, dominant negative helix-loop-helix protein [Source:HGNC Symbol;Acc:HGNC:5362]
ENSG00000117322	1	1	1	1	2	2	0	0	1	0	1	0	protein_coding	1	207454230	207489895	CR2	complement component (3d/Epstein Barr virus) receptor 2 [Source:HGNC Symbol;Acc:HGNC:2336]
ENSG00000117335	3265	3446	4216	3641	3398	4233	2840	2426	3248	2315	2962	3003	protein_coding	1	207752057	207795513	CD46	CD46 molecule, complement regulatory protein [Source:HGNC Symbol;Acc:HGNC:6953]
ENSG00000117360	1125	1163	1484	1137	1130	1341	896	881	1182	632	925	888	protein_coding	1	150321476	150353195	PRPF3	pre-mRNA processing factor 3 [Source:HGNC Symbol;Acc:HGNC:17348]
ENSG00000117362	2916	2952	3614	3047	2893	3585	2610	2261	2938	1989	2741	2560	protein_coding	1	150265399	150269580	APH1A	APH1A gamma secretase subunit [Source:HGNC Symbol;Acc:HGNC:29509]
ENSG00000117385	554	548	753	607	609	675	456	451	560	360	534	485	protein_coding	1	42746335	42767084	LEPRE1	leucine proline-enriched proteoglycan (leprecan) 1 [Source:HGNC Symbol;Acc:HGNC:19316]
ENSG00000117394	1429	1417	1763	956	1028	1109	1208	1211	1461	570	801	801	protein_coding	1	42925381	42958859	SLC2A1	solute carrier family 2 (facilitated glucose transporter), member 1 [Source:HGNC Symbol;Acc:HGNC:11005]
ENSG00000117395	1069	1143	1533	987	906	1136	1045	962	1215	597	827	783	protein_coding	1	43164175	43270936	EBNA1BP2	EBNA1 binding protein 2 [Source:HGNC Symbol;Acc:HGNC:15531]
ENSG00000117399	2632	2721	3423	2502	2482	2966	2318	2167	2714	1593	2116	2023	protein_coding	1	43358955	43363203	CDC20	cell division cycle 20 [Source:HGNC Symbol;Acc:HGNC:1723]
ENSG00000117400	2	3	4	4	3	1	1	3	0	2	3	2	protein_coding	1	43337807	43352772	MPL	MPL proto-oncogene, thrombopoietin receptor [Source:HGNC Symbol;Acc:HGNC:7217]
ENSG00000117407	51	53	82	66	64	52	62	44	41	31	46	38	protein_coding	1	43933320	43937241	ARTN	artemin [Source:HGNC Symbol;Acc:HGNC:727]
ENSG00000117408	1083	1086	1441	1192	1131	1386	901	779	1017	615	876	848	protein_coding	1	43946939	43968022	IPO13	importin 13 [Source:HGNC Symbol;Acc:HGNC:16853]
ENSG00000117410	2693	2765	3411	2806	2752	3244	2297	2058	2610	1602	2218	2023	protein_coding	1	43974487	43978295	ATP6V0B	ATPase, H+ transporting, lysosomal 21kDa, V0 subunit b [Source:HGNC Symbol;Acc:HGNC:861]
ENSG00000117411	2169	2155	2701	1875	1820	2237	1961	1783	2221	1286	1717	1611	protein_coding	1	43978943	43991170	B4GALT2	UDP-Gal:betaGlcNAc beta 1,4- galactosyltransferase, polypeptide 2 [Source:HGNC Symbol;Acc:HGNC:925]
ENSG00000117419	1663	1693	2193	1621	1582	1834	1528	1349	1745	1000	1366	1290	protein_coding	1	44221070	44355260	ERI3	ERI1 exoribonuclease family member 3 [Source:HGNC Symbol;Acc:HGNC:17276]
ENSG00000117425	42	35	58	35	38	28	25	15	24	14	24	22	protein_coding	1	44819844	44843063	PTCH2	patched 2 [Source:HGNC Symbol;Acc:HGNC:9586]
ENSG00000117448	2523	2588	3063	2180	2180	2675	2215	1878	2440	1355	1793	1732	protein_coding	1	45550543	45570049	AKR1A1	aldo-keto reductase family 1, member A1 (aldehyde reductase) [Source:HGNC Symbol;Acc:HGNC:380]
ENSG00000117450	9083	8956	10608	9542	9094	10704	7923	6813	9220	5941	7864	7441	protein_coding	1	45511036	45523047	PRDX1	peroxiredoxin 1 [Source:HGNC Symbol;Acc:HGNC:9352]
ENSG00000117461	1662	1635	2107	2714	2553	3222	1320	1181	1556	1554	2021	1921	protein_coding	1	46040140	46133036	PIK3R3	phosphoinositide-3-kinase, regulatory subunit 3 (gamma) [Source:HGNC Symbol;Acc:HGNC:8981]
ENSG00000117472	652	730	845	467	487	593	631	512	725	303	377	361	protein_coding	1	46175073	46185958	TSPAN1	tetraspanin 1 [Source:HGNC Symbol;Acc:HGNC:20657]
ENSG00000117475	711	677	907	752	627	830	596	540	725	416	604	559	protein_coding	1	169367970	169396540	BLZF1	basic leucine zipper nuclear factor 1 [Source:HGNC Symbol;Acc:HGNC:1065]
ENSG00000117477	0	0	0	0	0	0	1	0	0	0	0	0	protein_coding	1	169394870	169460669	CCDC181	coiled-coil domain containing 181 [Source:HGNC Symbol;Acc:HGNC:28051]
ENSG00000117479	1146	1119	1440	778	684	852	965	936	1173	474	672	703	protein_coding	1	169463909	169486003	SLC19A2	solute carrier family 19 (thiamine transporter), member 2 [Source:HGNC Symbol;Acc:HGNC:10938]
ENSG00000117480	2531	2602	3268	2984	2950	3341	1984	1800	2436	1525	2131	2051	protein_coding	1	46394265	46413848	FAAH	fatty acid amide hydrolase [Source:HGNC Symbol;Acc:HGNC:3553]
ENSG00000117481	989	1079	1340	1033	917	1165	856	798	1014	627	819	716	protein_coding	1	46340177	46365152	NSUN4	NOP2/Sun domain family, member 4 [Source:HGNC Symbol;Acc:HGNC:31802]
ENSG00000117500	2089	2163	2656	1975	1700	2294	1904	1790	2277	1203	1575	1548	protein_coding	1	93149742	93180728	TMED5	transmembrane emp24 protein transport domain containing 5 [Source:HGNC Symbol;Acc:HGNC:24251]
ENSG00000117501	0	0	0	1	0	0	0	0	0	0	0	0	protein_coding	1	170935471	171064765	MROH9	maestro heat-like repeat family member 9 [Source:HGNC Symbol;Acc:HGNC:26287]
ENSG00000117505	2464	2446	3036	2436	2158	2698	2153	2015	2567	1660	2118	2094	protein_coding	1	93345888	93369498	DR1	down-regulator of transcription 1, TBP-binding (negative cofactor 2) [Source:HGNC Symbol;Acc:HGNC:3017]
ENSG00000117519	7	3	5	3	3	4	1	2	2	1	3	3	protein_coding	1	94896949	94927278	CNN3	calponin 3, acidic [Source:HGNC Symbol;Acc:HGNC:2157]
ENSG00000117523	7021	7357	9469	9522	8049	10439	5963	6049	7239	6703	8999	8700	protein_coding	1	171485551	171593511	PRRC2C	proline-rich coiled-coil 2C [Source:HGNC Symbol;Acc:HGNC:24903]
ENSG00000117525	0	0	1	1	0	1	0	0	0	0	0	0	protein_coding	1	94529225	94541800	F3	coagulation factor III (thromboplastin, tissue factor) [Source:HGNC Symbol;Acc:HGNC:3541]
ENSG00000117528	2174	2060	2644	2198	2052	2707	1900	1715	2299	1639	2245	2179	protein_coding	1	94418455	94518666	ABCD3	ATP-binding cassette, sub-family D (ALD), member 3 [Source:HGNC Symbol;Acc:HGNC:67]
ENSG00000117533	310	350	354	375	343	451	340	254	317	241	329	341	protein_coding	1	171700160	171742247	VAMP4	vesicle-associated membrane protein 4 [Source:HGNC Symbol;Acc:HGNC:12645]
ENSG00000117543	947	986	1189	821	783	916	892	829	1062	532	769	725	protein_coding	1	100989623	101026088	DPH5	diphthamide biosynthesis 5 [Source:HGNC Symbol;Acc:HGNC:24270]
ENSG00000117569	352	399	473	901	847	927	318	308	374	497	659	648	protein_coding	1	96721665	96823738	PTBP2	polypyrimidine tract binding protein 2 [Source:HGNC Symbol;Acc:HGNC:17662]
ENSG00000117586	90	92	107	132	150	170	69	58	69	81	113	110	protein_coding	1	173183734	173207313	TNFSF4	tumor necrosis factor (ligand) superfamily, member 4 [Source:HGNC Symbol;Acc:HGNC:11934]
ENSG00000117592	9136	8937	11333	6653	6135	7892	7499	6859	8803	4143	5472	5032	protein_coding	1	173477266	173488807	PRDX6	peroxiredoxin 6 [Source:HGNC Symbol;Acc:HGNC:16753]
ENSG00000117593	2286	2335	2837	2081	1843	2246	1940	1906	2366	1391	1958	1742	protein_coding	1	173824503	173858546	DARS2	aspartyl-tRNA synthetase 2, mitochondrial [Source:HGNC Symbol;Acc:HGNC:25538]
ENSG00000117594	1	0	0	0	0	0	0	0	0	0	0	0	protein_coding	1	209686178	209734950	HSD11B1	hydroxysteroid (11-beta) dehydrogenase 1 [Source:HGNC Symbol;Acc:HGNC:5208]
ENSG00000117595	1251	1156	1426	1760	1692	2093	1170	996	1263	1390	1865	1834	protein_coding	1	209785623	209806175	IRF6	interferon regulatory factor 6 [Source:HGNC Symbol;Acc:HGNC:6121]
ENSG00000117597	807	828	1035	626	571	739	728	643	834	388	525	521	protein_coding	1	209828007	209857565	DIEXF	digestive organ expansion factor homolog (zebrafish) [Source:HGNC Symbol;Acc:HGNC:28440]
ENSG00000117598	0	0	0	1	1	2	0	0	0	0	0	0	protein_coding	1	98890245	99005032	LPPR5	Lipid phosphate phosphatase-related protein type 5 [Source:UniProtKB/Swiss-Prot;Acc:Q32ZL2]
ENSG00000117600	2	2	1	3	3	3	1	1	0	0	0	2	protein_coding	1	99263953	99309590	LPPR4	Lipid phosphate phosphatase-related protein type 4 [Source:UniProtKB/Swiss-Prot;Acc:Q7Z2D5]
ENSG00000117601	2	0	0	1	3	6	0	1	2	1	1	0	protein_coding	1	173903804	173917378	SERPINC1	serpin peptidase inhibitor, clade C (antithrombin), member 1 [Source:HGNC Symbol;Acc:HGNC:775]
ENSG00000117602	645	640	775	2048	1949	2307	507	444	593	934	1311	1365	protein_coding	1	24502351	24541040	RCAN3	RCAN family member 3 [Source:HGNC Symbol;Acc:HGNC:3042]
ENSG00000117614	288	287	367	339	299	359	264	251	325	179	264	255	protein_coding	1	25222679	25232502	SYF2	SYF2 pre-mRNA-splicing factor [Source:HGNC Symbol;Acc:HGNC:19824]
ENSG00000117616	240	251	317	355	362	415	164	167	200	185	250	227	protein_coding	1	25242237	25338213	RSRP1	arginine/serine-rich protein 1 [Source:HGNC Symbol;Acc:HGNC:25234]
ENSG00000117620	1217	1205	1444	1340	1235	1546	1118	968	1271	936	1196	1232	protein_coding	1	99969789	100026979	SLC35A3	solute carrier family 35 (UDP-N-acetylglucosamine (UDP-GlcNAc) transporter), member A3 [Source:HGNC Symbol;Acc:HGNC:11023]
ENSG00000117625	841	915	1101	1434	1256	1438	698	600	821	636	989	951	protein_coding	1	211258377	211316385	RCOR3	REST corepressor 3 [Source:HGNC Symbol;Acc:HGNC:25594]
ENSG00000117632	4318	4513	5536	4656	4408	5322	4066	3747	4643	3241	4247	4118	protein_coding	1	25884181	25906991	STMN1	stathmin 1 [Source:HGNC Symbol;Acc:HGNC:6510]
ENSG00000117640	474	516	596	627	618	718	413	370	469	319	487	470	protein_coding	1	25818640	25832942	MTFR1L	mitochondrial fission regulator 1-like [Source:HGNC Symbol;Acc:HGNC:28836]
ENSG00000117643	39	65	50	135	92	116	55	45	58	76	124	94	protein_coding	1	25617468	25786207	MAN1C1	mannosidase, alpha, class 1C, member 1 [Source:HGNC Symbol;Acc:HGNC:19080]
ENSG00000117650	997	1006	1256	1033	974	1161	848	843	1047	804	1093	983	protein_coding	1	211658657	211675630	NEK2	NIMA-related kinase 2 [Source:HGNC Symbol;Acc:HGNC:7745]
ENSG00000117676	1085	1118	1353	1105	1001	1259	1022	897	1131	680	927	854	protein_coding	1	26529761	26575030	RPS6KA1	ribosomal protein S6 kinase, 90kDa, polypeptide 1 [Source:HGNC Symbol;Acc:HGNC:10430]
ENSG00000117682	493	518	631	480	399	512	422	400	499	295	415	354	protein_coding	1	26432282	26471294	DHDDS	dehydrodolichyl diphosphate synthase [Source:HGNC Symbol;Acc:HGNC:20603]
ENSG00000117691	796	802	1026	902	856	1099	745	694	848	583	780	716	protein_coding	1	212432887	212446379	NENF	neudesin neurotrophic factor [Source:HGNC Symbol;Acc:HGNC:30384]
ENSG00000117697	1007	1032	1372	1075	956	1189	983	878	1113	623	888	888	protein_coding	1	212726153	212791782	NSL1	NSL1, MIS12 kinetochore complex component [Source:HGNC Symbol;Acc:HGNC:24548]
ENSG00000117707	0	0	0	0	0	1	1	4	0	1	0	0	protein_coding	1	213983181	214041502	PROX1	prospero homeobox 1 [Source:HGNC Symbol;Acc:HGNC:9459]
ENSG00000117713	3704	3928	5013	4919	4575	5437	2821	2946	3446	2839	4058	3928	protein_coding	1	26696033	26782104	ARID1A	AT rich interactive domain 1A (SWI-like) [Source:HGNC Symbol;Acc:HGNC:11110]
ENSG00000117724	5975	6366	7908	6696	5812	7902	5674	5357	6503	5528	7171	6871	protein_coding	1	214603195	214664588	CENPF	centromere protein F, 350/400kDa [Source:HGNC Symbol;Acc:HGNC:1857]
ENSG00000117748	1693	1707	2117	1537	1498	1821	1369	1316	1802	863	1231	1197	protein_coding	1	27891524	27914746	RPA2	replication protein A2, 32kDa [Source:HGNC Symbol;Acc:HGNC:10290]
ENSG00000117751	1510	1476	1964	1499	1293	1614	1309	1243	1597	865	1181	1186	protein_coding	1	27830778	27851676	PPP1R8	protein phosphatase 1, regulatory subunit 8 [Source:HGNC Symbol;Acc:HGNC:9296]
ENSG00000117758	915	1009	1241	1194	1121	1441	814	756	993	698	878	826	protein_coding	1	27773183	27824452	STX12	syntaxin 12 [Source:HGNC Symbol;Acc:HGNC:11430]
ENSG00000117791	374	434	558	495	466	582	371	344	430	282	436	402	protein_coding	1	220748225	220784815	MARC2	mitochondrial amidoxime reducing component 2 [Source:HGNC Symbol;Acc:HGNC:26064]
ENSG00000117834	0	1	1	0	0	0	2	0	0	0	0	0	protein_coding	1	48222685	48248644	SLC5A9	solute carrier family 5 (sodium/sugar cotransporter), member 9 [Source:HGNC Symbol;Acc:HGNC:22146]
ENSG00000117859	644	685	889	674	607	802	528	556	743	410	602	574	protein_coding	1	51577179	51798427	OSBPL9	oxysterol binding protein-like 9 [Source:HGNC Symbol;Acc:HGNC:16386]
ENSG00000117862	1684	1627	2141	1245	1119	1423	1575	1422	1852	883	1177	1187	protein_coding	1	52020131	52056171	TXNDC12	thioredoxin domain containing 12 (endoplasmic reticulum) [Source:HGNC Symbol;Acc:HGNC:24626]
ENSG00000118193	1125	1160	1486	985	898	1129	1019	1024	1204	753	1031	1010	protein_coding	1	200551497	200620734	KIF14	kinesin family member 14 [Source:HGNC Symbol;Acc:HGNC:19181]
ENSG00000118194	24	29	23	29	29	27	9	11	16	24	41	22	protein_coding	1	201359008	201377762	TNNT2	troponin T type 2 (cardiac) [Source:HGNC Symbol;Acc:HGNC:11949]
ENSG00000118197	444	440	552	463	429	488	372	334	441	302	352	374	protein_coding	1	200623896	200669969	DDX59	DEAD (Asp-Glu-Ala-Asp) box polypeptide 59 [Source:HGNC Symbol;Acc:HGNC:25360]
ENSG00000118200	2046	2000	2432	2128	1951	2707	1573	1503	1871	1285	1689	1632	protein_coding	1	200739558	200860704	CAMSAP2	calmodulin regulated spectrin-associated protein family, member 2 [Source:HGNC Symbol;Acc:HGNC:29188]
ENSG00000118217	1656	1719	2109	1870	1597	2029	1650	1490	1792	1286	1701	1603	protein_coding	1	161766294	161964070	ATF6	activating transcription factor 6 [Source:HGNC Symbol;Acc:HGNC:791]
ENSG00000118292	4	8	3	9	3	4	8	6	6	3	4	2	protein_coding	1	150268200	150280916	C1orf54	chromosome 1 open reading frame 54 [Source:HGNC Symbol;Acc:HGNC:26258]
ENSG00000118298	2	0	3	4	4	3	3	0	1	0	1	0	protein_coding	1	150257159	150265078	CA14	carbonic anhydrase XIV [Source:HGNC Symbol;Acc:HGNC:1372]
ENSG00000118454	865	857	1100	999	871	1131	793	709	875	664	839	736	protein_coding	1	70260588	70354734	ANKRD13C	ankyrin repeat domain 13C [Source:HGNC Symbol;Acc:HGNC:25374]
ENSG00000118473	11	7	6	4	5	9	4	4	14	1	2	4	protein_coding	1	66533383	66748299	SGIP1	SH3-domain GRB2-like (endophilin) interacting protein 1 [Source:HGNC Symbol;Acc:HGNC:25412]
ENSG00000118655	697	731	848	542	487	624	609	524	694	354	442	431	protein_coding	1	113905141	113914086	DCLRE1B	DNA cross-link repair 1B [Source:HGNC Symbol;Acc:HGNC:17641]
ENSG00000118873	983	957	1175	1313	1248	1582	826	779	905	841	1088	1068	protein_coding	1	220148293	220272454	RAB3GAP2	RAB3 GTPase activating protein subunit 2 (non-catalytic) [Source:HGNC Symbol;Acc:HGNC:17168]
ENSG00000119280	1047	1081	1276	1065	970	1274	854	873	1064	696	946	857	protein_coding	1	230837119	230869589	C1orf198	chromosome 1 open reading frame 198 [Source:HGNC Symbol;Acc:HGNC:25900]
ENSG00000119283	2	1	1	2	2	1	3	0	1	1	1	2	protein_coding	1	231162112	231221556	TRIM67	tripartite motif containing 67 [Source:HGNC Symbol;Acc:HGNC:31859]
ENSG00000119285	2187	2106	2838	1763	1630	2117	1946	1811	2325	1249	1646	1647	protein_coding	1	236549005	236604504	HEATR1	HEAT repeat containing 1 [Source:HGNC Symbol;Acc:HGNC:25517]
ENSG00000119535	2	1	4	3	1	0	3	0	2	1	5	3	protein_coding	1	36466043	36483278	CSF3R	colony stimulating factor 3 receptor (granulocyte) [Source:HGNC Symbol;Acc:HGNC:2439]
ENSG00000120332	2	1	0	0	1	1	0	0	0	0	2	1	protein_coding	1	175067858	175148066	TNN	tenascin N [Source:HGNC Symbol;Acc:HGNC:22942]
ENSG00000120333	881	836	1063	829	833	951	694	649	839	487	668	642	protein_coding	1	175010789	175023425	MRPS14	mitochondrial ribosomal protein S14 [Source:HGNC Symbol;Acc:HGNC:14049]
ENSG00000120334	549	542	675	493	425	510	478	389	541	277	343	337	protein_coding	1	173799550	173824720	CENPL	centromere protein L [Source:HGNC Symbol;Acc:HGNC:17879]
ENSG00000120337	1	1	0	0	0	0	0	2	1	0	1	1	protein_coding	1	173039960	173050963	TNFSF18	tumor necrosis factor (ligand) superfamily, member 18 [Source:HGNC Symbol;Acc:HGNC:11932]
ENSG00000120341	0	0	0	0	0	1	0	0	0	0	0	0	protein_coding	1	177923956	177984303	SEC16B	SEC16 homolog B (S. cerevisiae) [Source:HGNC Symbol;Acc:HGNC:30301]
ENSG00000120370	146	142	175	144	151	188	119	91	137	80	123	109	protein_coding	1	170532129	170553446	GORAB	golgin, RAB6-interacting [Source:HGNC Symbol;Acc:HGNC:25676]
ENSG00000120656	403	416	543	506	422	528	351	336	437	259	417	358	protein_coding	1	28589323	28643085	TAF12	TAF12 RNA polymerase II, TATA box binding protein (TBP)-associated factor, 20kDa [Source:HGNC Symbol;Acc:HGNC:11545]
ENSG00000120942	1070	1218	1495	923	836	1079	977	915	1169	554	692	725	protein_coding	1	11273206	11296049	UBIAD1	UbiA prenyltransferase domain containing 1 [Source:HGNC Symbol;Acc:HGNC:30791]
ENSG00000120948	3034	3011	3723	3157	2883	3627	2628	2349	3162	1873	2644	2595	protein_coding	1	11012344	11026420	TARDBP	TAR DNA binding protein [Source:HGNC Symbol;Acc:HGNC:11571]
ENSG00000120949	6	10	14	20	26	29	8	7	4	11	16	16	protein_coding	1	12063377	12144207	TNFRSF8	tumor necrosis factor receptor superfamily, member 8 [Source:HGNC Symbol;Acc:HGNC:11923]
ENSG00000120952	0	0	0	0	0	0	0	0	0	1	0	0	protein_coding	1	12857086	12861909	PRAMEF2	PRAME family member 2 [Source:HGNC Symbol;Acc:HGNC:28841]
ENSG00000121310	1230	1269	1678	1613	1608	1736	967	929	1192	724	1244	1104	protein_coding	1	52895910	52927212	ECHDC2	enoyl CoA hydratase domain containing 2 [Source:HGNC Symbol;Acc:HGNC:23408]
ENSG00000121446	0	0	0	0	1	1	0	0	1	0	0	0	protein_coding	1	182450121	182560599	RGSL1	regulator of G-protein signaling like 1 [Source:HGNC Symbol;Acc:HGNC:18636]
ENSG00000121454	9	9	22	121	129	139	13	12	15	64	97	70	protein_coding	1	180230286	180278982	LHX4	LIM homeobox 4 [Source:HGNC Symbol;Acc:HGNC:21734]
ENSG00000121481	529	457	641	462	423	523	457	455	578	337	413	377	protein_coding	1	185045364	185102608	RNF2	ring finger protein 2 [Source:HGNC Symbol;Acc:HGNC:10061]
ENSG00000121486	965	941	1227	840	733	940	930	808	1044	483	743	744	protein_coding	1	185118098	185157072	TRMT1L	tRNA methyltransferase 1 homolog (S. cerevisiae)-like [Source:HGNC Symbol;Acc:HGNC:16782]
ENSG00000121644	1508	1440	1714	1412	1312	1705	1381	1158	1525	1271	1540	1585	protein_coding	1	244652935	244709033	DESI2	desumoylating isopeptidase 2 [Source:HGNC Symbol;Acc:HGNC:24264]
ENSG00000121753	63	60	58	238	250	238	51	41	61	137	194	166	protein_coding	1	31727117	31764893	BAI2	brain-specific angiogenesis inhibitor 2 [Source:HGNC Symbol;Acc:HGNC:944]
ENSG00000121766	1094	1043	1383	860	697	907	981	863	1081	517	715	629	protein_coding	1	31296982	31364953	ZCCHC17	zinc finger, CCHC domain containing 17 [Source:HGNC Symbol;Acc:HGNC:30246]
ENSG00000121769	0	1	0	0	0	0	0	0	0	0	0	0	protein_coding	1	31365625	31376850	FABP3	fatty acid binding protein 3, muscle and heart (mammary-derived growth inhibitor) [Source:HGNC Symbol;Acc:HGNC:3557]
ENSG00000121774	5113	5316	6525	4981	4561	5687	4366	4135	5216	3283	4380	4205	protein_coding	1	32013829	32060850	KHDRBS1	KH domain containing, RNA binding, signal transduction associated 1 [Source:HGNC Symbol;Acc:HGNC:18116]
ENSG00000121775	238	231	276	213	236	220	167	196	202	111	179	157	protein_coding	1	32072031	32102866	TMEM39B	transmembrane protein 39B [Source:HGNC Symbol;Acc:HGNC:25510]
ENSG00000121851	224	231	269	287	273	349	186	183	243	189	254	225	protein_coding	1	145964702	145978848	POLR3GL	polymerase (RNA) III (DNA directed) polypeptide G (32kD)-like [Source:HGNC Symbol;Acc:HGNC:28466]
ENSG00000121900	1576	1513	1967	1387	1260	1690	1195	1157	1484	845	987	967	protein_coding	1	32894594	32901438	TMEM54	transmembrane protein 54 [Source:HGNC Symbol;Acc:HGNC:24143]
ENSG00000121903	207	228	278	257	242	316	211	193	267	165	241	209	protein_coding	1	33472645	33496507	ZSCAN20	zinc finger and SCAN domain containing 20 [Source:HGNC Symbol;Acc:HGNC:13093]
ENSG00000121904	1	0	0	1	0	0	0	0	1	0	0	1	protein_coding	1	33513999	34165842	CSMD2	CUB and Sushi multiple domains 2 [Source:HGNC Symbol;Acc:HGNC:19290]
ENSG00000121905	1	1	0	0	3	2	2	0	2	0	4	1	protein_coding	1	32885994	32898441	HPCA	hippocalcin [Source:HGNC Symbol;Acc:HGNC:5144]
ENSG00000121931	522	567	715	627	536	777	492	481	573	372	468	456	protein_coding	1	110947185	110964079	LRIF1	ligand dependent nuclear receptor interacting factor 1 [Source:HGNC Symbol;Acc:HGNC:30299]
ENSG00000121933	0	0	2	1	0	1	0	1	0	0	1	0	protein_coding	1	111483348	111563962	ADORA3	adenosine A3 receptor [Source:HGNC Symbol;Acc:HGNC:268]
ENSG00000121940	1973	1904	2496	1725	1722	2067	1697	1531	2024	961	1417	1359	protein_coding	1	108929508	108963457	CLCC1	chloride channel CLIC-like 1 [Source:HGNC Symbol;Acc:HGNC:29675]
ENSG00000121957	797	808	1048	1189	1055	1236	770	715	878	895	1172	1178	protein_coding	1	108875350	108934545	GPSM2	G-protein signaling modulator 2 [Source:HGNC Symbol;Acc:HGNC:29501]
ENSG00000122176	1	5	1	0	0	1	0	2	4	0	1	0	protein_coding	1	203340628	203351489	FMOD	fibromodulin [Source:HGNC Symbol;Acc:HGNC:3774]
ENSG00000122218	3747	3824	4894	3618	3260	4186	3103	2994	3676	2375	3020	2876	protein_coding	1	160289273	160343400	COPA	coatomer protein complex, subunit alpha [Source:HGNC Symbol;Acc:HGNC:2230]
ENSG00000122224	5	11	16	2	0	0	6	10	8	0	0	1	protein_coding	1	160796074	160828261	LY9	lymphocyte antigen 9 [Source:HGNC Symbol;Acc:HGNC:6730]
ENSG00000122406	12751	12529	15387	10974	10396	12749	11453	10198	12763	7652	10320	9869	protein_coding	1	92832025	92841924	RPL5	ribosomal protein L5 [Source:HGNC Symbol;Acc:HGNC:10360]
ENSG00000122417	499	515	640	657	594	760	487	422	538	424	583	573	protein_coding	1	86346824	86396342	ODF2L	outer dense fiber of sperm tails 2-like [Source:HGNC Symbol;Acc:HGNC:29225]
ENSG00000122420	4136	4032	5080	2594	2241	3018	4145	3581	4832	3176	4291	4227	protein_coding	1	78303884	78539749	PTGFR	prostaglandin F receptor (FP) [Source:HGNC Symbol;Acc:HGNC:9600]
ENSG00000122432	12	12	11	27	20	33	6	4	12	20	27	29	transcribed_unprocessed_pseudogene	1	84506291	84566194	SPATA1	spermatogenesis associated 1 [Source:HGNC Symbol;Acc:HGNC:14682]
ENSG00000122435	617	662	755	612	565	710	497	500	699	369	524	495	protein_coding	1	100133150	100150497	TRMT13	tRNA methyltransferase 13 homolog (S. cerevisiae) [Source:HGNC Symbol;Acc:HGNC:25502]
ENSG00000122477	10	19	21	7	11	18	13	14	14	9	17	11	protein_coding	1	100148449	100178273	LRRC39	leucine rich repeat containing 39 [Source:HGNC Symbol;Acc:HGNC:28228]
ENSG00000122481	44	33	41	57	69	71	39	32	41	36	38	44	protein_coding	1	95234155	95247225	RWDD3	RWD domain containing 3 [Source:HGNC Symbol;Acc:HGNC:21393]
ENSG00000122482	1471	1453	1873	1707	1512	1954	1315	1183	1541	1030	1371	1400	protein_coding	1	90915298	91022272	ZNF644	zinc finger protein 644 [Source:HGNC Symbol;Acc:HGNC:29222]
ENSG00000122483	464	479	643	491	439	584	442	374	507	313	421	405	protein_coding	1	93179919	93278730	CCDC18	coiled-coil domain containing 18 [Source:HGNC Symbol;Acc:HGNC:30370]
ENSG00000122484	945	949	1185	1366	1232	1564	824	736	908	670	900	897	protein_coding	1	92298965	92402056	RPAP2	RNA polymerase II associated protein 2 [Source:HGNC Symbol;Acc:HGNC:25791]
ENSG00000123080	661	718	983	814	787	936	520	502	626	383	573	583	protein_coding	1	50960745	50974633	CDKN2C	cyclin-dependent kinase inhibitor 2C (p18, inhibits CDK4) [Source:HGNC Symbol;Acc:HGNC:1789]
ENSG00000123091	2534	2546	3196	2597	2306	3103	2330	1959	2538	1619	2093	1960	protein_coding	1	51236271	51273455	RNF11	ring finger protein 11 [Source:HGNC Symbol;Acc:HGNC:10056]
ENSG00000123472	3193	3446	4188	3842	3382	4293	2858	2609	3322	2031	2761	2624	protein_coding	1	46632737	46673867	ATPAF1	ATP synthase mitochondrial F1 complex assembly factor 1 [Source:HGNC Symbol;Acc:HGNC:18803]
ENSG00000123473	1526	1639	2087	1274	1208	1517	1332	1247	1618	877	1127	1086	protein_coding	1	47250139	47314147	STIL	SCL/TAL1 interrupting locus [Source:HGNC Symbol;Acc:HGNC:10879]
ENSG00000123684	1487	1514	1941	1595	1419	1924	1510	1366	1794	1046	1447	1403	protein_coding	1	211743457	211830772	LPGAT1	lysophosphatidylglycerol acyltransferase 1 [Source:HGNC Symbol;Acc:HGNC:28985]
ENSG00000123685	11	10	9	6	9	8	12	11	16	9	10	17	protein_coding	1	212686418	212699985	BATF3	basic leucine zipper transcription factor, ATF-like 3 [Source:HGNC Symbol;Acc:HGNC:28915]
ENSG00000123836	924	938	1110	712	695	835	800	681	955	472	689	632	protein_coding	1	207034366	207081024	PFKFB2	6-phosphofructo-2-kinase/fructose-2,6-biphosphatase 2 [Source:HGNC Symbol;Acc:HGNC:8873]
ENSG00000123838	1	1	1	2	2	1	1	0	2	1	0	1	protein_coding	1	207104262	207144972	C4BPA	complement component 4 binding protein, alpha [Source:HGNC Symbol;Acc:HGNC:1325]
ENSG00000123843	1	0	0	0	0	3	1	0	1	1	0	0	protein_coding	1	207006845	207099993	C4BPB	complement component 4 binding protein, beta [Source:HGNC Symbol;Acc:HGNC:1328]
ENSG00000125459	562	568	682	499	498	455	514	412	559	232	385	358	protein_coding	1	155610205	155614967	MSTO1	misato 1, mitochondrial distribution and morphology regulator [Source:HGNC Symbol;Acc:HGNC:29678]
ENSG00000125462	8	5	7	10	6	11	4	4	8	7	13	16	protein_coding	1	156404250	156430701	C1orf61	chromosome 1 open reading frame 61 [Source:HGNC Symbol;Acc:HGNC:30780]
ENSG00000125703	342	389	442	495	413	544	378	325	421	320	392	365	protein_coding	1	62784135	62865513	ATG4C	autophagy related 4C, cysteine peptidase [Source:HGNC Symbol;Acc:HGNC:16040]
ENSG00000125944	4466	4611	6069	4774	4322	5224	3796	3682	4761	2819	3886	3934	protein_coding	1	23303771	23344336	HNRNPR	heterogeneous nuclear ribonucleoprotein R [Source:HGNC Symbol;Acc:HGNC:5047]
ENSG00000125945	222	206	270	278	283	338	196	182	209	156	232	220	protein_coding	1	23359448	23369442	ZNF436	zinc finger protein 436 [Source:HGNC Symbol;Acc:HGNC:20814]
ENSG00000126067	3822	3840	4846	2783	2633	3346	3118	3131	3886	1736	2394	2334	protein_coding	1	35599544	35641844	PSMB2	proteasome (prosome, macropain) subunit, beta type, 2 [Source:HGNC Symbol;Acc:HGNC:9539]
ENSG00000126070	765	901	1069	1026	962	1118	673	615	762	606	871	851	protein_coding	1	35930718	36072500	AGO3	argonaute RISC catalytic component 3 [Source:HGNC Symbol;Acc:HGNC:18421]
ENSG00000126088	971	938	1236	1250	1206	1282	847	827	953	763	1075	956	protein_coding	1	45012147	45015575	UROD	uroporphyrinogen decarboxylase [Source:HGNC Symbol;Acc:HGNC:12591]
ENSG00000126091	114	119	140	265	235	276	96	100	100	148	183	178	protein_coding	1	43705824	43931165	ST3GAL3	ST3 beta-galactoside alpha-2,3-sialyltransferase 3 [Source:HGNC Symbol;Acc:HGNC:10866]
ENSG00000126106	175	226	261	187	139	231	160	143	188	87	130	101	protein_coding	1	44635238	44674555	TMEM53	transmembrane protein 53 [Source:HGNC Symbol;Acc:HGNC:26186]
ENSG00000126107	1030	1041	1357	1177	1108	1314	961	875	1135	736	980	944	protein_coding	1	45002540	45011329	HECTD3	HECT domain containing E3 ubiquitin protein ligase 3 [Source:HGNC Symbol;Acc:HGNC:26117]
ENSG00000126698	2578	2635	3427	2493	2327	2874	2455	2299	2989	1591	2252	2171	protein_coding	1	28199456	28233025	DNAJC8	DnaJ (Hsp40) homolog, subfamily C, member 8 [Source:HGNC Symbol;Acc:HGNC:15470]
ENSG00000126705	330	393	481	570	555	621	308	241	343	330	454	416	protein_coding	1	27534035	27604431	AHDC1	AT hook, DNA binding motif, containing 1 [Source:HGNC Symbol;Acc:HGNC:25230]
ENSG00000126709	57	70	70	114	108	140	49	47	54	59	87	85	protein_coding	1	27666061	27672218	IFI6	interferon, alpha-inducible protein 6 [Source:HGNC Symbol;Acc:HGNC:4054]
ENSG00000127054	1825	1971	2432	1854	1864	1919	1555	1488	1889	980	1511	1448	protein_coding	1	1311585	1324691	CPSF3L	cleavage and polyadenylation specific factor 3-like [Source:HGNC Symbol;Acc:HGNC:26052]
ENSG00000127124	84	91	110	212	181	219	77	68	90	109	168	151	protein_coding	1	41506365	42035925	HIVEP3	human immunodeficiency virus type I enhancer binding protein 3 [Source:HGNC Symbol;Acc:HGNC:13561]
ENSG00000127125	1248	1297	1685	1682	1508	1971	1191	1053	1320	932	1350	1268	protein_coding	1	42456117	42473385	PPCS	phosphopantothenoylcysteine synthetase [Source:HGNC Symbol;Acc:HGNC:25686]
ENSG00000127129	33	31	32	137	114	147	25	16	25	48	61	90	protein_coding	1	41478775	41484673	EDN2	endothelin 2 [Source:HGNC Symbol;Acc:HGNC:3177]
ENSG00000127423	242	241	267	180	204	216	184	205	226	112	181	166	protein_coding	1	25831913	25859458	AUNIP	aurora kinase A and ninein interacting protein [Source:HGNC Symbol;Acc:HGNC:28363]
ENSG00000127463	1724	1678	2025	1812	1653	2040	1410	1346	1694	1181	1759	1602	protein_coding	1	19215664	19251552	EMC1	ER membrane protein complex subunit 1 [Source:HGNC Symbol;Acc:HGNC:28957]
ENSG00000127472	21	25	26	1	1	1	15	21	22	0	0	2	protein_coding	1	20028179	20091190	PLA2G5	phospholipase A2, group V [Source:HGNC Symbol;Acc:HGNC:9038]
ENSG00000127481	2732	2771	3566	3994	3589	4788	2300	2170	2523	2357	3490	3370	protein_coding	1	19074506	19210276	UBR4	ubiquitin protein ligase E3 component n-recognin 4 [Source:HGNC Symbol;Acc:HGNC:30313]
ENSG00000127483	2629	2833	3540	3073	2911	3425	2334	2174	2954	2120	2834	2730	protein_coding	1	20742661	20787323	HP1BP3	heterochromatin protein 1, binding protein 3 [Source:HGNC Symbol;Acc:HGNC:24973]
ENSG00000127603	2690	2657	3498	3881	3340	4470	2426	2247	2523	2490	3251	3246	protein_coding	1	39081316	39487177	MACF1	microtubule-actin crosslinking factor 1 [Source:HGNC Symbol;Acc:HGNC:13664]
ENSG00000130695	645	578	794	531	571	613	534	476	583	430	539	496	protein_coding	1	26234153	26279038	CEP85	centrosomal protein 85kDa [Source:HGNC Symbol;Acc:HGNC:25309]
ENSG00000130762	1032	1011	1328	982	971	1090	882	767	1079	565	834	781	protein_coding	1	3454426	3481113	ARHGEF16	Rho guanine nucleotide exchange factor (GEF) 16 [Source:HGNC Symbol;Acc:HGNC:15515]
ENSG00000130764	1698	1818	2224	1663	1630	1879	1408	1294	1667	941	1278	1268	protein_coding	1	3778558	3796504	LRRC47	leucine rich repeat containing 47 [Source:HGNC Symbol;Acc:HGNC:29207]
ENSG00000130766	754	805	1005	825	771	815	558	534	704	544	757	750	protein_coding	1	28259527	28282491	SESN2	sestrin 2 [Source:HGNC Symbol;Acc:HGNC:20746]
ENSG00000130768	528	561	774	560	516	620	475	427	603	295	472	457	protein_coding	1	27934993	27959157	SMPDL3B	sphingomyelin phosphodiesterase, acid-like 3B [Source:HGNC Symbol;Acc:HGNC:21416]
ENSG00000130770	3413	3428	4439	4414	3946	4901	2632	2632	3317	2312	3040	2959	protein_coding	1	28236109	28246906	ATPIF1	ATPase inhibitory factor 1 [Source:HGNC Symbol;Acc:HGNC:871]
ENSG00000130772	477	470	587	478	460	531	391	367	489	301	393	349	protein_coding	1	28329002	28335967	MED18	mediator complex subunit 18 [Source:HGNC Symbol;Acc:HGNC:25944]
ENSG00000130939	1961	1909	2531	1755	1647	2060	1589	1523	1949	1143	1583	1509	protein_coding	1	10032832	10181239	UBE4B	ubiquitination factor E4B [Source:HGNC Symbol;Acc:HGNC:12500]
ENSG00000130940	1116	1146	1508	2373	2207	2320	901	909	1105	1161	1627	1607	protein_coding	1	10636604	10796650	CASZ1	castor zinc finger 1 [Source:HGNC Symbol;Acc:HGNC:26002]
ENSG00000131236	3486	3556	4385	3281	2954	3706	3205	2998	3829	2133	2957	2713	protein_coding	1	40040233	40072649	CAP1	CAP, adenylate cyclase-associated protein 1 (yeast) [Source:HGNC Symbol;Acc:HGNC:20040]
ENSG00000131238	3176	3229	3927	2561	2453	3092	3201	2817	3751	1811	2370	2251	protein_coding	1	40072705	40097703	PPT1	palmitoyl-protein thioesterase 1 [Source:HGNC Symbol;Acc:HGNC:9325]
ENSG00000131584	1727	1836	2079	2148	2191	2175	1221	1043	1515	879	1431	1488	protein_coding	1	1292376	1309609	ACAP3	ArfGAP with coiled-coil, ankyrin repeat and PH domains 3 [Source:HGNC Symbol;Acc:HGNC:16754]
ENSG00000131591	305	326	381	322	332	359	256	230	265	204	255	282	protein_coding	1	1081818	1116361	C1orf159	chromosome 1 open reading frame 159 [Source:HGNC Symbol;Acc:HGNC:26062]
ENSG00000131697	639	659	779	568	612	672	472	420	534	336	534	505	protein_coding	1	5862810	5992473	NPHP4	nephronophthisis 4 [Source:HGNC Symbol;Acc:HGNC:19104]
ENSG00000131778	1393	1357	1780	1493	1325	1731	1209	1093	1446	847	1202	1143	protein_coding	1	147242641	147295766	CHD1L	chromodomain helicase DNA binding protein 1-like [Source:HGNC Symbol;Acc:HGNC:1916]
ENSG00000131779	443	515	558	546	542	637	362	319	445	334	449	409	protein_coding	1	145911350	145918837	PEX11B	peroxisomal biogenesis factor 11 beta [Source:HGNC Symbol;Acc:HGNC:8853]
ENSG00000131781	9	7	1	6	5	6	2	4	2	2	2	3	protein_coding	1	147175351	147243050	FMO5	flavin containing monooxygenase 5 [Source:HGNC Symbol;Acc:HGNC:3773]
ENSG00000131788	940	937	1257	1236	1199	1291	833	807	953	721	1072	965	protein_coding	1	145848522	145859836	PIAS3	protein inhibitor of activated STAT, 3 [Source:HGNC Symbol;Acc:HGNC:16861]
ENSG00000131791	421	442	543	522	466	547	354	357	440	295	444	449	protein_coding	1	147155106	147172550	PRKAB2	protein kinase, AMP-activated, beta 2 non-catalytic subunit [Source:HGNC Symbol;Acc:HGNC:9379]
ENSG00000131910	0	0	0	0	0	0	0	0	1	0	1	1	protein_coding	1	26911489	26913966	NR0B2	nuclear receptor subfamily 0, group B, member 2 [Source:HGNC Symbol;Acc:HGNC:7961]
ENSG00000131914	0	0	1	2	1	0	0	1	0	0	0	0	protein_coding	1	26410778	26429722	LIN28A	lin-28 homolog A (C. elegans) [Source:HGNC Symbol;Acc:HGNC:15986]
ENSG00000132122	202	203	260	434	423	484	193	160	212	286	354	363	protein_coding	1	48295372	48472208	SPATA6	spermatogenesis associated 6 [Source:HGNC Symbol;Acc:HGNC:18309]
ENSG00000132128	2089	2161	2599	2597	2586	2983	1712	1491	2041	1409	1986	1837	protein_coding	1	46261196	46303608	LRRC41	leucine rich repeat containing 41 [Source:HGNC Symbol;Acc:HGNC:16917]
ENSG00000132185	2	2	1	0	1	1	2	1	2	0	0	1	protein_coding	1	161706972	161714352	FCRLA	Fc receptor-like A [Source:HGNC Symbol;Acc:HGNC:18504]
ENSG00000132196	223	232	305	334	335	368	233	208	278	196	259	244	protein_coding	1	162790702	162812817	HSD17B7	hydroxysteroid (17-beta) dehydrogenase 7 [Source:HGNC Symbol;Acc:HGNC:5215]
ENSG00000132485	1558	1702	2146	1911	1757	2248	1491	1326	1732	1219	1666	1606	protein_coding	1	71063291	71081297	ZRANB2	zinc finger, RAN-binding domain containing 2 [Source:HGNC Symbol;Acc:HGNC:13058]
ENSG00000132676	3264	3250	4092	2983	2714	3260	2967	2641	3458	1889	2621	2483	protein_coding	1	155687960	155739010	DAP3	death associated protein 3 [Source:HGNC Symbol;Acc:HGNC:2673]
ENSG00000132677	12	11	11	34	30	27	10	16	10	14	18	18	protein_coding	1	156369212	156385219	RHBG	Rh family, B glycoprotein (gene/pseudogene) [Source:HGNC Symbol;Acc:HGNC:14572]
ENSG00000132680	904	950	1113	953	942	1045	722	644	815	513	796	735	protein_coding	1	155913043	155934400	KIAA0907	KIAA0907 [Source:HGNC Symbol;Acc:HGNC:29145]
ENSG00000132681	0	0	2	0	1	0	1	0	0	0	0	0	protein_coding	1	160151570	160186977	ATP1A4	ATPase, Na+/K+ transporting, alpha 4 polypeptide [Source:HGNC Symbol;Acc:HGNC:14073]
ENSG00000132688	6	2	8	11	11	17	1	3	4	4	7	5	protein_coding	1	156668763	156677397	NES	nestin [Source:HGNC Symbol;Acc:HGNC:7756]
ENSG00000132692	0	0	0	0	0	0	0	0	0	1	0	0	protein_coding	1	156641390	156659532	BCAN	brevican [Source:HGNC Symbol;Acc:HGNC:23059]
ENSG00000132694	1851	1995	2407	2346	2286	2599	1417	1390	1790	1384	1816	1724	protein_coding	1	156934840	157045370	ARHGEF11	Rho guanine nucleotide exchange factor (GEF) 11 [Source:HGNC Symbol;Acc:HGNC:14580]
ENSG00000132698	982	991	1251	1225	1149	1403	915	861	1044	749	995	949	protein_coding	1	156061160	156070514	RAB25	RAB25, member RAS oncogene family [Source:HGNC Symbol;Acc:HGNC:18238]
ENSG00000132702	2	6	1	1	3	5	2	2	1	4	2	4	protein_coding	1	156619294	156625725	HAPLN2	hyaluronan and proteoglycan link protein 2 [Source:HGNC Symbol;Acc:HGNC:17410]
ENSG00000132716	1372	1423	1748	1548	1512	1653	1122	992	1341	835	1335	1155	protein_coding	1	160215715	160262531	DCAF8	DDB1 and CUL4 associated factor 8 [Source:HGNC Symbol;Acc:HGNC:24891]
ENSG00000132718	0	1	2	7	2	4	1	1	1	5	1	3	protein_coding	1	155859509	155885199	SYT11	synaptotagmin XI [Source:HGNC Symbol;Acc:HGNC:19239]
ENSG00000132763	1205	1110	1413	878	821	910	1010	992	1245	508	732	674	protein_coding	1	45500053	45513382	MMACHC	methylmalonic aciduria (cobalamin deficiency) cblC type, with homocystinuria [Source:HGNC Symbol;Acc:HGNC:24525]
ENSG00000132768	1028	1113	1323	749	737	864	970	841	1088	425	616	575	protein_coding	1	43970000	43973369	DPH2	DPH2 homolog (S. cerevisiae) [Source:HGNC Symbol;Acc:HGNC:3004]
ENSG00000132773	464	500	623	477	442	464	373	355	485	227	325	339	protein_coding	1	45339670	45343975	TOE1	target of EGR1, member 1 (nuclear) [Source:HGNC Symbol;Acc:HGNC:15954]
ENSG00000132780	4761	5229	6453	4445	4142	4814	4371	4177	5126	2825	3841	3781	protein_coding	1	45583846	45618904	NASP	nuclear autoantigenic sperm protein (histone-binding) [Source:HGNC Symbol;Acc:HGNC:7644]
ENSG00000132781	648	679	916	675	666	716	603	507	635	396	561	519	protein_coding	1	45329163	45340470	MUTYH	mutY homolog [Source:HGNC Symbol;Acc:HGNC:7527]
ENSG00000132849	2433	2459	3166	3274	2934	3733	1874	1765	2246	1963	2627	2567	protein_coding	1	61742477	62163920	INADL	InaD-like (Drosophila) [Source:HGNC Symbol;Acc:HGNC:28881]
ENSG00000132854	4	1	7	3	6	11	6	3	3	4	15	1	protein_coding	1	62236979	62319414	KANK4	KN motif and ankyrin repeat domains 4 [Source:HGNC Symbol;Acc:HGNC:27263]
ENSG00000132855	8	5	3	0	0	1	5	3	2	0	0	0	protein_coding	1	62597487	62606159	ANGPTL3	angiopoietin-like 3 [Source:HGNC Symbol;Acc:HGNC:491]
ENSG00000132879	457	413	527	832	849	875	373	285	400	399	603	548	protein_coding	1	11654375	11663327	FBXO44	F-box protein 44 [Source:HGNC Symbol;Acc:HGNC:24847]
ENSG00000132881	70	64	100	99	92	104	64	66	61	51	79	71	protein_coding	1	16231700	16237162	RSG1	REM2 and RAB-like small GTPase 1 [Source:HGNC Symbol;Acc:HGNC:28127]
ENSG00000132906	148	137	165	187	177	237	122	107	143	94	136	138	protein_coding	1	15490832	15526534	CASP9	caspase 9, apoptosis-related cysteine peptidase [Source:HGNC Symbol;Acc:HGNC:1511]
ENSG00000133019	18	25	36	7	3	2	59	52	64	44	37	44	protein_coding	1	239386565	239915452	CHRM3	cholinergic receptor, muscarinic 3 [Source:HGNC Symbol;Acc:HGNC:1952]
ENSG00000133048	1	1	1	2	0	4	0	0	0	1	1	4	protein_coding	1	203178931	203186749	CHI3L1	chitinase 3-like 1 (cartilage glycoprotein-39) [Source:HGNC Symbol;Acc:HGNC:1932]
ENSG00000133056	1022	1049	1338	1606	1428	1646	730	766	931	929	1252	1227	protein_coding	1	204422628	204494724	PIK3C2B	phosphatidylinositol-4-phosphate 3-kinase, catalytic subunit type 2 beta [Source:HGNC Symbol;Acc:HGNC:8972]
ENSG00000133059	1028	1011	1192	1183	987	1376	855	754	953	795	916	934	protein_coding	1	205142505	205211566	DSTYK	dual serine/threonine and tyrosine protein kinase [Source:HGNC Symbol;Acc:HGNC:29043]
ENSG00000133063	0	0	0	1	0	0	0	0	0	0	0	0	protein_coding	1	203212827	203273641	CHIT1	chitinase 1 (chitotriosidase) [Source:HGNC Symbol;Acc:HGNC:1936]
ENSG00000133065	2168	2370	2891	1811	1636	1977	2041	2015	2566	1126	1553	1443	protein_coding	1	205789093	205813748	SLC41A1	solute carrier family 41 (magnesium transporter), member 1 [Source:HGNC Symbol;Acc:HGNC:19429]
ENSG00000133067	2	1	0	1	1	1	2	0	2	2	3	0	protein_coding	1	202193901	202319781	LGR6	leucine-rich repeat containing G protein-coupled receptor 6 [Source:HGNC Symbol;Acc:HGNC:19719]
ENSG00000133069	74	120	118	159	154	170	89	67	100	88	130	120	protein_coding	1	205228176	205273343	TMCC2	transmembrane and coiled-coil domain family 2 [Source:HGNC Symbol;Acc:HGNC:24239]
ENSG00000133216	230	232	320	421	389	482	192	168	214	227	311	317	protein_coding	1	22710839	22915325	EPHB2	EPH receptor B2 [Source:HGNC Symbol;Acc:HGNC:3393]
ENSG00000133226	3104	3222	4246	3528	3130	3551	2750	2723	3349	1878	2939	2822	protein_coding	1	24631716	24673267	SRRM1	serine/arginine repetitive matrix 1 [Source:HGNC Symbol;Acc:HGNC:16638]
ENSG00000134183	12	9	9	9	11	7	11	5	9	5	8	6	protein_coding	1	109603267	109619929	GNAT2	guanine nucleotide binding protein (G protein), alpha transducing activity polypeptide 2 [Source:HGNC Symbol;Acc:HGNC:4394]
ENSG00000134184	0	0	0	0	0	1	0	0	0	0	0	0	protein_coding	1	109687814	109709039	GSTM1	glutathione S-transferase mu 1 [Source:HGNC Symbol;Acc:HGNC:4632]
ENSG00000134186	1488	1438	1923	1357	1257	1499	1235	1144	1500	697	1000	1024	protein_coding	1	108692323	108701803	PRPF38B	pre-mRNA processing factor 38B [Source:HGNC Symbol;Acc:HGNC:25512]
ENSG00000134193	5	6	9	19	6	12	1	7	8	6	5	11	protein_coding	1	119794018	119811660	REG4	regenerating islet-derived family, member 4 [Source:HGNC Symbol;Acc:HGNC:22977]
ENSG00000134202	1981	1980	2385	2654	2477	3107	1704	1550	1964	1511	2147	2040	protein_coding	1	109733932	109741038	GSTM3	glutathione S-transferase mu 3 (brain) [Source:HGNC Symbol;Acc:HGNC:4635]
ENSG00000134207	0	0	0	0	0	0	2	0	0	0	0	0	protein_coding	1	114089291	114153919	SYT6	synaptotagmin VI [Source:HGNC Symbol;Acc:HGNC:18638]
ENSG00000134215	20	23	28	40	42	65	26	40	33	27	39	37	protein_coding	1	107571160	107965144	VAV3	vav 3 guanine nucleotide exchange factor [Source:HGNC Symbol;Acc:HGNC:12659]
ENSG00000134222	631	648	855	661	653	742	552	537	686	446	597	536	protein_coding	1	109279556	109283186	PSRC1	proline/serine-rich coiled-coil 1 [Source:HGNC Symbol;Acc:HGNC:24472]
ENSG00000134240	139	133	157	878	849	1128	156	150	183	553	694	696	protein_coding	1	119747996	119768905	HMGCS2	3-hydroxy-3-methylglutaryl-CoA synthase 2 (mitochondrial) [Source:HGNC Symbol;Acc:HGNC:5008]
ENSG00000134242	0	0	0	1	0	0	0	0	0	0	0	0	protein_coding	1	113813811	113871759	PTPN22	protein tyrosine phosphatase, non-receptor type 22 (lymphoid) [Source:HGNC Symbol;Acc:HGNC:9652]
ENSG00000134243	932	929	1200	889	840	1116	836	760	952	499	675	628	protein_coding	1	109309568	109397951	SORT1	sortilin 1 [Source:HGNC Symbol;Acc:HGNC:11186]
ENSG00000134245	4	5	5	39	42	42	3	6	3	18	32	27	protein_coding	1	112466541	112530165	WNT2B	wingless-type MMTV integration site family, member 2B [Source:HGNC Symbol;Acc:HGNC:12781]
ENSG00000134247	2588	2585	3142	2931	2645	3379	2419	2283	2710	2133	2985	2771	protein_coding	1	116910057	116990358	PTGFRN	prostaglandin F2 receptor inhibitor [Source:HGNC Symbol;Acc:HGNC:9601]
ENSG00000134248	1254	1208	1413	1250	1092	1384	1042	936	1200	738	990	933	protein_coding	1	110401249	110407942	LAMTOR5	late endosomal/lysosomal adaptor, MAPK and MTOR activator 5 [Source:HGNC Symbol;Acc:HGNC:17955]
ENSG00000134250	2242	2175	2803	3108	2703	3481	2078	1866	2268	2149	2879	2600	protein_coding	1	119911553	120069626	NOTCH2	notch 2 [Source:HGNC Symbol;Acc:HGNC:7882]
ENSG00000134253	297	296	341	444	446	538	212	203	274	255	388	335	protein_coding	1	117111060	117122587	TRIM45	tripartite motif containing 45 [Source:HGNC Symbol;Acc:HGNC:19018]
ENSG00000134255	667	699	894	713	583	781	607	589	708	394	564	557	protein_coding	1	111139627	111185102	CEPT1	choline/ethanolamine phosphotransferase 1 [Source:HGNC Symbol;Acc:HGNC:24289]
ENSG00000134256	26	38	38	45	49	43	23	17	24	15	28	30	protein_coding	1	117001750	117036476	CD101	CD101 molecule [Source:HGNC Symbol;Acc:HGNC:5949]
ENSG00000134258	0	0	0	0	1	2	0	0	0	0	0	1	protein_coding	1	117143587	117210960	VTCN1	V-set domain containing T cell activation inhibitor 1 [Source:HGNC Symbol;Acc:HGNC:28873]
ENSG00000134262	448	466	548	425	412	475	348	325	440	261	322	298	protein_coding	1	113894748	113905201	AP4B1	adaptor-related protein complex 4, beta 1 subunit [Source:HGNC Symbol;Acc:HGNC:572]
ENSG00000134369	855	883	1038	1404	1304	1502	845	841	887	1028	1449	1371	protein_coding	1	201622885	201826969	NAV1	neuron navigator 1 [Source:HGNC Symbol;Acc:HGNC:15989]
ENSG00000134371	1764	1902	2323	1637	1444	1865	1798	1569	2031	1091	1465	1441	protein_coding	1	193122017	193253901	CDC73	cell division cycle 73 [Source:HGNC Symbol;Acc:HGNC:16783]
ENSG00000134375	2399	2451	3061	2023	1809	2401	2104	1858	2441	1198	1574	1624	protein_coding	1	201955491	201970661	TIMM17A	translocase of inner mitochondrial membrane 17 homolog A (yeast) [Source:HGNC Symbol;Acc:HGNC:17315]
ENSG00000134376	0	0	0	0	0	0	1	0	0	0	0	0	protein_coding	1	197268204	197478455	CRB1	crumbs family member 1, photoreceptor morphogenesis associated [Source:HGNC Symbol;Acc:HGNC:2343]
ENSG00000134389	0	1	3	0	0	0	1	0	0	0	0	0	protein_coding	1	196977556	197009674	CFHR5	complement factor H-related 5 [Source:HGNC Symbol;Acc:HGNC:24668]
ENSG00000134644	2703	2755	3627	3244	2926	3605	2293	2141	2620	2072	2714	2626	protein_coding	1	30931506	31065991	PUM1	pumilio RNA-binding family member 1 [Source:HGNC Symbol;Acc:HGNC:14957]
ENSG00000134668	0	0	2	1	4	8	3	0	2	0	0	0	protein_coding	1	31790422	31816051	SPOCD1	SPOC domain containing 1 [Source:HGNC Symbol;Acc:HGNC:26338]
ENSG00000134684	6670	6695	8175	4050	3801	4717	5599	5133	6607	2811	4077	3663	protein_coding	1	32775237	32818153	YARS	tyrosyl-tRNA synthetase [Source:HGNC Symbol;Acc:HGNC:12840]
ENSG00000134686	1217	1303	1653	1389	1421	1655	1113	968	1277	934	1251	1228	protein_coding	1	33323623	33431052	PHC2	polyhomeotic homolog 2 (Drosophila) [Source:HGNC Symbol;Acc:HGNC:3183]
ENSG00000134690	1415	1446	1770	1376	1274	1452	1185	1131	1529	864	1165	1180	protein_coding	1	37692418	37709719	CDCA8	cell division cycle associated 8 [Source:HGNC Symbol;Acc:HGNC:14629]
ENSG00000134697	3176	3142	3959	2824	2662	3255	2839	2573	3126	1776	2434	2307	protein_coding	1	37566816	37595935	GNL2	guanine nucleotide binding protein-like 2 (nucleolar) [Source:HGNC Symbol;Acc:HGNC:29925]
ENSG00000134698	976	938	1185	1495	1408	1683	802	814	948	896	1189	1207	protein_coding	1	35808172	35857890	AGO4	argonaute RISC catalytic component 4 [Source:HGNC Symbol;Acc:HGNC:18424]
ENSG00000134709	2245	2224	2772	2067	1899	2483	2060	1905	2461	1518	1942	1794	protein_coding	1	59814786	59876378	HOOK1	hook microtubule-tethering protein 1 [Source:HGNC Symbol;Acc:HGNC:19884]
ENSG00000134716	222	221	288	202	208	237	224	200	219	129	189	162	protein_coding	1	59893308	59926790	CYP2J2	cytochrome P450, family 2, subfamily J, polypeptide 2 [Source:HGNC Symbol;Acc:HGNC:2634]
ENSG00000134717	2492	2568	3048	2373	2174	2738	2236	1973	2559	1553	1998	1898	protein_coding	1	52056125	52090716	BTF3L4	basic transcription factor 3-like 4 [Source:HGNC Symbol;Acc:HGNC:30547]
ENSG00000134744	1544	1544	1872	1706	1525	1911	1344	1208	1473	1141	1479	1394	protein_coding	1	52408282	52553487	ZCCHC11	zinc finger, CCHC domain containing 11 [Source:HGNC Symbol;Acc:HGNC:28981]
ENSG00000134748	1827	1853	2306	1876	1611	2073	1690	1474	1963	1084	1443	1454	protein_coding	1	52404564	52420839	PRPF38A	pre-mRNA processing factor 38A [Source:HGNC Symbol;Acc:HGNC:25930]
ENSG00000135744	18	19	20	34	27	26	43	24	37	63	67	79	protein_coding	1	230702523	230714297	AGT	angiotensinogen (serpin peptidase inhibitor, clade A, member 8) [Source:HGNC Symbol;Acc:HGNC:333]
ENSG00000135747	9	6	13	9	11	15	8	8	7	10	3	15	protein_coding	1	246945547	247078811	ZNF670	zinc finger protein 670 [Source:HGNC Symbol;Acc:HGNC:28167]
ENSG00000135749	869	836	1036	662	596	742	723	633	869	345	514	510	protein_coding	1	232983435	233295713	PCNXL2	pecanex-like 2 (Drosophila) [Source:HGNC Symbol;Acc:HGNC:8736]
ENSG00000135750	708	716	904	762	716	860	662	606	735	534	734	708	protein_coding	1	233614004	233672512	KCNK1	potassium channel, subfamily K, member 1 [Source:HGNC Symbol;Acc:HGNC:6272]
ENSG00000135763	581	566	737	436	409	542	484	450	585	284	384	363	protein_coding	1	229626234	229660199	URB2	URB2 ribosome biogenesis 2 homolog (S. cerevisiae) [Source:HGNC Symbol;Acc:HGNC:28967]
ENSG00000135766	860	866	1070	1053	919	1201	919	815	1042	648	902	915	protein_coding	1	231363751	231425044	EGLN1	egl-9 family hypoxia-inducible factor 1 [Source:HGNC Symbol;Acc:HGNC:1232]
ENSG00000135773	3	8	5	4	2	2	7	5	9	4	8	4	protein_coding	1	230747384	230802003	CAPN9	calpain 9 [Source:HGNC Symbol;Acc:HGNC:1486]
ENSG00000135775	878	955	1196	1009	875	1115	869	782	950	618	801	775	protein_coding	1	230642489	230693982	COG2	component of oligomeric golgi complex 2 [Source:HGNC Symbol;Acc:HGNC:6546]
ENSG00000135776	909	924	1165	762	718	842	879	741	931	478	637	651	protein_coding	1	229516582	229558695	ABCB10	ATP-binding cassette, sub-family B (MDR/TAP), member 10 [Source:HGNC Symbol;Acc:HGNC:41]
ENSG00000135778	1188	1249	1547	1139	1090	1324	1188	1049	1373	703	1004	938	protein_coding	1	232950605	232983882	NTPCR	nucleoside-triphosphatase, cancer-related [Source:HGNC Symbol;Acc:HGNC:28204]
ENSG00000135801	952	973	1154	639	635	737	780	747	993	432	594	557	protein_coding	1	229593111	229626047	TAF5L	TAF5-like RNA polymerase II, p300/CBP-associated factor (PCAF)-associated factor, 65kDa [Source:HGNC Symbol;Acc:HGNC:17304]
ENSG00000135821	3942	4086	5144	5253	4741	5725	4216	3840	5044	3615	4815	4656	protein_coding	1	182381704	182392206	GLUL	glutamate-ammonia ligase [Source:HGNC Symbol;Acc:HGNC:4341]
ENSG00000135823	883	930	1143	971	894	1112	812	723	904	669	883	814	protein_coding	1	180972712	181023121	STX6	syntaxin 6 [Source:HGNC Symbol;Acc:HGNC:11441]
ENSG00000135824	1	1	1	0	0	1	0	0	0	0	0	0	protein_coding	1	182646104	182684576	RGS8	regulator of G-protein signaling 8 [Source:HGNC Symbol;Acc:HGNC:16810]
ENSG00000135828	153	155	207	203	158	181	142	104	162	110	160	123	protein_coding	1	182573634	182589256	RNASEL	ribonuclease L (2',5'-oligoisoadenylate synthetase-dependent) [Source:HGNC Symbol;Acc:HGNC:10050]
ENSG00000135829	7676	7842	9840	7877	7150	9038	6807	6057	7978	4459	5903	5901	protein_coding	1	182839369	182887751	DHX9	DEAH (Asp-Glu-Ala-His) box helicase 9 [Source:HGNC Symbol;Acc:HGNC:2750]
ENSG00000135835	2	2	3	2	0	1	1	0	0	2	0	3	protein_coding	1	180913154	180951614	KIAA1614	KIAA1614 [Source:HGNC Symbol;Acc:HGNC:29327]
ENSG00000135837	1427	1579	1959	1675	1421	1963	1193	1083	1359	1007	1245	1324	protein_coding	1	179954738	180114880	CEP350	centrosomal protein 350kDa [Source:HGNC Symbol;Acc:HGNC:24238]
ENSG00000135838	95	110	124	100	112	133	97	75	109	64	102	74	protein_coding	1	182789293	182830384	NPL	N-acetylneuraminate pyruvate lyase (dihydrodipicolinate synthase) [Source:HGNC Symbol;Acc:HGNC:16781]
ENSG00000135842	492	512	671	301	273	366	563	493	585	454	634	543	protein_coding	1	184790724	184974550	FAM129A	family with sequence similarity 129, member A [Source:HGNC Symbol;Acc:HGNC:16784]
ENSG00000135845	482	532	594	539	519	594	458	406	561	315	470	407	protein_coding	1	172370189	172444086	PIGC	phosphatidylinositol glycan anchor biosynthesis, class C [Source:HGNC Symbol;Acc:HGNC:8960]
ENSG00000135862	14123	14471	19003	5958	5381	7159	9605	9389	11985	3703	5067	4826	protein_coding	1	183023460	183145592	LAMC1	laminin, gamma 1 (formerly LAMB2) [Source:HGNC Symbol;Acc:HGNC:6492]
ENSG00000135870	1121	1209	1487	1238	1021	1363	837	852	1061	721	956	917	protein_coding	1	173931214	174022297	RC3H1	ring finger and CCCH-type domains 1 [Source:HGNC Symbol;Acc:HGNC:29434]
ENSG00000136628	13704	13740	17082	9664	8771	11436	12198	10816	14168	7029	9183	8788	protein_coding	1	219968601	220046658	EPRS	glutamyl-prolyl-tRNA synthetase [Source:HGNC Symbol;Acc:HGNC:3418]
ENSG00000136630	19	16	23	14	14	22	15	21	13	5	10	15	protein_coding	1	220879400	220885059	HLX	H2.0-like homeobox [Source:HGNC Symbol;Acc:HGNC:4978]
ENSG00000136631	820	950	1075	1001	908	1095	728	663	843	587	827	748	protein_coding	1	150067293	150145327	VPS45	vacuolar protein sorting 45 homolog (S. cerevisiae) [Source:HGNC Symbol;Acc:HGNC:14579]
ENSG00000136634	0	0	2	0	0	1	0	0	0	0	0	0	protein_coding	1	206767602	206772494	IL10	interleukin 10 [Source:HGNC Symbol;Acc:HGNC:5962]
ENSG00000136636	2206	2266	2788	2395	2057	2597	1986	1861	2358	1439	1842	1808	protein_coding	1	215567392	215621807	KCTD3	potassium channel tetramerization domain containing 3 [Source:HGNC Symbol;Acc:HGNC:21305]
ENSG00000136643	1026	1108	1302	924	836	1088	1080	939	1235	696	916	941	protein_coding	1	213051233	213274773	RPS6KC1	ribosomal protein S6 kinase, 52kDa, polypeptide 1 [Source:HGNC Symbol;Acc:HGNC:10439]
ENSG00000137936	249	258	344	120	130	136	248	203	276	95	136	124	protein_coding	1	93561786	93847150	BCAR3	breast cancer anti-estrogen resistance 3 [Source:HGNC Symbol;Acc:HGNC:973]
ENSG00000137941	389	415	542	705	580	791	344	347	386	373	558	471	protein_coding	1	83865028	83999150	TTLL7	tubulin tyrosine ligase-like family, member 7 [Source:HGNC Symbol;Acc:HGNC:26242]
ENSG00000137942	1848	1940	2398	2532	2210	2842	1656	1550	1943	1368	1869	1787	protein_coding	1	93448131	93554661	FNBP1L	formin binding protein 1-like [Source:HGNC Symbol;Acc:HGNC:20851]
ENSG00000137944	360	340	396	376	369	463	277	268	358	216	325	306	protein_coding	1	88935773	88992953	CCBL2	cysteine conjugate-beta lyase 2 [Source:HGNC Symbol;Acc:HGNC:33238]
ENSG00000137947	555	578	743	603	533	675	472	469	550	331	413	411	protein_coding	1	88852932	88891944	GTF2B	general transcription factor IIB [Source:HGNC Symbol;Acc:HGNC:4648]
ENSG00000137948	21	17	25	51	66	81	29	26	30	22	27	42	protein_coding	1	91949371	92014426	BRDT	bromodomain, testis-specific [Source:HGNC Symbol;Acc:HGNC:1105]
ENSG00000137955	2515	2734	3173	2814	2536	3140	2208	1898	2568	1803	2446	2335	protein_coding	1	75786197	75795079	RABGGTB	Rab geranylgeranyltransferase, beta subunit [Source:HGNC Symbol;Acc:HGNC:9796]
ENSG00000137959	5	5	5	2	4	7	5	4	4	1	1	3	protein_coding	1	78619922	78646145	IFI44L	interferon-induced protein 44-like [Source:HGNC Symbol;Acc:HGNC:17817]
ENSG00000137960	0	0	1	2	2	2	0	2	0	0	1	1	protein_coding	1	77979542	78138449	GIPC2	GIPC PDZ domain containing family, member 2 [Source:HGNC Symbol;Acc:HGNC:18177]
ENSG00000137962	991	947	1229	2337	2045	2730	965	822	1048	1440	1967	1881	protein_coding	1	94148988	94275068	ARHGAP29	Rho GTPase activating protein 29 [Source:HGNC Symbol;Acc:HGNC:30207]
ENSG00000137965	41	50	55	29	22	16	29	30	54	17	21	35	protein_coding	1	78649796	78664078	IFI44	interferon-induced protein 44 [Source:HGNC Symbol;Acc:HGNC:16938]
ENSG00000137968	3	3	1	0	0	2	0	2	1	1	1	1	protein_coding	1	75202131	75611116	SLC44A5	solute carrier family 44, member 5 [Source:HGNC Symbol;Acc:HGNC:28524]
ENSG00000137970	3	4	5	5	0	5	5	2	4	4	0	4	processed_pseudogene	1	96678874	96679620	RPL7P9	ribosomal protein L7 pseudogene 9 [Source:HGNC Symbol;Acc:HGNC:37028]
ENSG00000137975	1	5	4	6	6	8	15	17	23	38	59	49	protein_coding	1	86424086	86456558	CLCA2	chloride channel accessory 2 [Source:HGNC Symbol;Acc:HGNC:2016]
ENSG00000137976	289	252	319	230	223	273	207	212	257	136	206	198	protein_coding	1	84398532	84415018	DNASE2B	deoxyribonuclease II beta [Source:HGNC Symbol;Acc:HGNC:28875]
ENSG00000137992	2815	2849	3578	2907	2490	3267	2628	2215	2984	1946	2550	2502	protein_coding	1	100186919	100249834	DBT	dihydrolipoamide branched chain transacylase E2 [Source:HGNC Symbol;Acc:HGNC:2698]
ENSG00000137996	1310	1326	1610	1046	951	1182	1218	1102	1369	726	942	929	protein_coding	1	100266207	100292769	RTCA	RNA 3'-terminal phosphate cyclase [Source:HGNC Symbol;Acc:HGNC:17981]
ENSG00000142583	0	1	0	1	5	1	1	3	3	0	0	1	protein_coding	1	9035107	9088478	SLC2A5	solute carrier family 2 (facilitated glucose/fructose transporter), member 5 [Source:HGNC Symbol;Acc:HGNC:11010]
ENSG00000142599	780	931	1130	1427	1308	1331	653	667	794	591	910	931	protein_coding	1	8352397	8817643	RERE	arginine-glutamic acid dipeptide (RE) repeats [Source:HGNC Symbol;Acc:HGNC:9965]
ENSG00000142606	58	37	71	83	82	88	46	31	51	38	56	60	protein_coding	1	2590639	2632990	MMEL1	membrane metallo-endopeptidase-like 1 [Source:HGNC Symbol;Acc:HGNC:14668]
ENSG00000142609	2	2	3	4	3	1	3	0	2	1	4	0	protein_coding	1	1921951	2003837	KIAA1751	KIAA1751 [Source:HGNC Symbol;Acc:HGNC:29368]
ENSG00000142611	2	0	1	0	0	1	1	0	2	0	1	1	protein_coding	1	3069168	3438621	PRDM16	PR domain containing 16 [Source:HGNC Symbol;Acc:HGNC:14000]
ENSG00000142619	0	0	0	0	0	1	0	0	0	0	0	1	protein_coding	1	17249098	17284233	PADI3	peptidyl arginine deiminase, type III [Source:HGNC Symbol;Acc:HGNC:18337]
ENSG00000142621	3	6	4	2	2	5	2	2	6	1	2	5	protein_coding	1	15247272	15400283	FHAD1	forkhead-associated (FHA) phosphopeptide binding domain 1 [Source:HGNC Symbol;Acc:HGNC:29408]
ENSG00000142623	0	0	1	0	2	4	0	0	1	0	1	2	protein_coding	1	17205126	17246005	PADI1	peptidyl arginine deiminase, type I [Source:HGNC Symbol;Acc:HGNC:18367]
ENSG00000142627	204	241	253	344	334	364	169	192	232	209	301	276	protein_coding	1	16124337	16156087	EPHA2	EPH receptor A2 [Source:HGNC Symbol;Acc:HGNC:3386]
ENSG00000142632	300	267	353	301	291	371	244	213	276	175	262	233	protein_coding	1	16197854	16212609	ARHGEF19	Rho guanine nucleotide exchange factor (GEF) 19 [Source:HGNC Symbol;Acc:HGNC:26604]
ENSG00000142634	493	495	603	485	493	523	427	447	523	298	392	364	protein_coding	1	15409895	15430343	EFHD2	EF-hand domain family, member D2 [Source:HGNC Symbol;Acc:HGNC:28670]
ENSG00000142655	361	406	478	451	416	485	312	349	384	263	383	366	protein_coding	1	10472288	10630758	PEX14	peroxisomal biogenesis factor 14 [Source:HGNC Symbol;Acc:HGNC:8856]
ENSG00000142657	3525	3406	4544	2893	2749	3299	3081	2848	3736	1833	2563	2517	protein_coding	1	10398592	10420144	PGD	phosphogluconate dehydrogenase [Source:HGNC Symbol;Acc:HGNC:8891]
ENSG00000142661	1	1	0	0	1	0	3	1	2	0	1	0	protein_coding	1	24056035	24112175	MYOM3	myomesin 3 [Source:HGNC Symbol;Acc:HGNC:26679]
ENSG00000142669	550	596	765	790	768	920	475	535	635	429	573	542	protein_coding	1	26279176	26281522	SH3BGRL3	SH3 domain binding glutamate-rich protein like 3 [Source:HGNC Symbol;Acc:HGNC:15568]
ENSG00000142675	229	230	327	270	271	318	177	177	255	142	235	207	protein_coding	1	26177403	26189886	CNKSR1	connector enhancer of kinase suppressor of Ras 1 [Source:HGNC Symbol;Acc:HGNC:19700]
ENSG00000142676	10433	10906	13637	9756	8936	10664	9094	8859	11289	5748	8275	7952	protein_coding	1	23691779	23696425	RPL11	ribosomal protein L11 [Source:HGNC Symbol;Acc:HGNC:10301]
ENSG00000142677	20	14	20	1	1	3	4	12	14	0	0	0	protein_coding	1	24119771	24143121	IL22RA1	interleukin 22 receptor, alpha 1 [Source:HGNC Symbol;Acc:HGNC:13700]
ENSG00000142684	175	171	231	154	115	134	157	156	218	85	125	124	protein_coding	1	26169871	26172060	ZNF593	zinc finger protein 593 [Source:HGNC Symbol;Acc:HGNC:30943]
ENSG00000142686	742	746	898	801	838	991	640	532	723	470	610	545	protein_coding	1	35713875	35719472	C1orf216	chromosome 1 open reading frame 216 [Source:HGNC Symbol;Acc:HGNC:26800]
ENSG00000142687	2215	2233	2741	3260	3043	3890	1884	1763	2012	1886	2625	2414	protein_coding	1	35433490	35557950	KIAA0319L	KIAA0319-like [Source:HGNC Symbol;Acc:HGNC:30071]
ENSG00000142694	7	3	5	22	14	15	5	7	4	7	11	7	protein_coding	1	36322031	36324154	EVA1B	eva-1 homolog B (C. elegans) [Source:HGNC Symbol;Acc:HGNC:25558]
ENSG00000142700	0	0	1	0	1	0	0	2	0	0	0	1	protein_coding	1	50417550	50423500	DMRTA2	DMRT-like family A2 [Source:HGNC Symbol;Acc:HGNC:13908]
ENSG00000142733	541	531	711	443	393	492	417	418	517	214	342	307	protein_coding	1	27355184	27366892	MAP3K6	mitogen-activated protein kinase kinase kinase 6 [Source:HGNC Symbol;Acc:HGNC:6858]
ENSG00000142751	827	842	967	815	784	908	610	570	788	428	610	587	protein_coding	1	26876133	26890297	GPN2	GPN-loop GTPase 2 [Source:HGNC Symbol;Acc:HGNC:25513]
ENSG00000142765	1067	1151	1483	878	917	940	812	804	990	526	792	696	protein_coding	1	27342020	27353937	SYTL1	synaptotagmin-like 1 [Source:HGNC Symbol;Acc:HGNC:15584]
ENSG00000142784	1543	1621	2067	2257	2202	2608	1370	1296	1587	1411	2027	1897	protein_coding	1	27234516	27308633	WDTC1	WD and tetratricopeptide repeats 1 [Source:HGNC Symbol;Acc:HGNC:29175]
ENSG00000142794	178	138	167	206	191	214	132	113	149	120	172	161	protein_coding	1	21440128	21485005	NBPF3	neuroblastoma breakpoint family, member 3 [Source:HGNC Symbol;Acc:HGNC:25076]
ENSG00000142798	107	88	128	563	569	601	95	96	100	472	672	635	protein_coding	1	21822245	21937297	HSPG2	heparan sulfate proteoglycan 2 [Source:HGNC Symbol;Acc:HGNC:5273]
ENSG00000142856	493	529	615	518	507	618	515	389	511	361	447	438	protein_coding	1	63440770	63593721	ITGB3BP	integrin beta 3 binding protein (beta3-endonexin) [Source:HGNC Symbol;Acc:HGNC:6157]
ENSG00000142864	11314	11413	14041	10317	9193	11886	10739	9582	12320	6982	9215	8906	protein_coding	1	67407810	67430415	SERBP1	SERPINE1 mRNA binding protein 1 [Source:HGNC Symbol;Acc:HGNC:17860]
ENSG00000142867	458	435	572	445	470	555	396	356	478	283	376	380	protein_coding	1	85266248	85277090	BCL10	B-cell CLL/lymphoma 10 [Source:HGNC Symbol;Acc:HGNC:989]
ENSG00000142871	157	203	208	193	168	207	141	141	161	98	128	141	protein_coding	1	85580761	85583962	CYR61	cysteine-rich, angiogenic inducer, 61 [Source:HGNC Symbol;Acc:HGNC:2654]
ENSG00000142875	14557	14369	18874	21294	18879	24424	12887	12032	15295	11414	15248	15463	protein_coding	1	84078062	84238498	PRKACB	protein kinase, cAMP-dependent, catalytic, beta [Source:HGNC Symbol;Acc:HGNC:9381]
ENSG00000142892	1762	1759	2241	1638	1430	1775	1545	1474	1829	1041	1436	1371	protein_coding	1	77088990	77219430	PIGK	phosphatidylinositol glycan anchor biosynthesis, class K [Source:HGNC Symbol;Acc:HGNC:8965]
ENSG00000142910	10	6	18	14	10	11	7	7	6	6	14	13	protein_coding	1	31576485	31587686	TINAGL1	tubulointerstitial nephritis antigen-like 1 [Source:HGNC Symbol;Acc:HGNC:19168]
ENSG00000142920	49	45	58	105	103	97	37	27	42	57	77	89	protein_coding	1	33081104	33120530	AZIN2	antizyme inhibitor 2 [Source:HGNC Symbol;Acc:HGNC:29957]
ENSG00000142937	22717	22648	27927	21772	20047	25391	19475	17176	22408	13603	18919	17856	protein_coding	1	44775251	44778779	RPS8	ribosomal protein S8 [Source:HGNC Symbol;Acc:HGNC:10441]
ENSG00000142945	1907	1882	2321	1906	1765	2150	1661	1518	1960	1421	1945	1692	protein_coding	1	44739818	44767767	KIF2C	kinesin family member 2C [Source:HGNC Symbol;Acc:HGNC:6393]
ENSG00000142949	10644	10714	13527	17952	16026	20011	8634	8169	9989	10321	14699	13876	protein_coding	1	43525187	43623666	PTPRF	protein tyrosine phosphatase, receptor type, F [Source:HGNC Symbol;Acc:HGNC:9670]
ENSG00000142959	1	4	2	13	5	11	1	0	3	3	7	3	protein_coding	1	44783585	44787705	BEST4	bestrophin 4 [Source:HGNC Symbol;Acc:HGNC:17106]
ENSG00000142961	141	124	142	389	309	365	99	89	128	192	274	249	protein_coding	1	46607715	46616891	MOB3C	MOB kinase activator 3C [Source:HGNC Symbol;Acc:HGNC:29800]
ENSG00000142973	0	2	4	9	8	8	0	3	2	6	9	12	protein_coding	1	46757838	46819413	CYP4B1	cytochrome P450, family 4, subfamily B, polypeptide 1 [Source:HGNC Symbol;Acc:HGNC:2644]
ENSG00000143001	0	1	0	3	2	0	0	1	1	0	0	0	protein_coding	1	54980792	54992293	TMEM61	transmembrane protein 61 [Source:HGNC Symbol;Acc:HGNC:27296]
ENSG00000143013	631	670	792	491	463	562	586	453	681	507	681	621	protein_coding	1	87328468	87348923	LMO4	LIM domain only 4 [Source:HGNC Symbol;Acc:HGNC:6644]
ENSG00000143028	0	1	1	1	2	0	0	0	0	0	1	0	protein_coding	1	109466628	109482137	SYPL2	synaptophysin-like 2 [Source:HGNC Symbol;Acc:HGNC:27638]
ENSG00000143033	604	539	721	650	629	777	543	514	640	410	582	540	protein_coding	1	93079235	93139081	MTF2	metal response element binding transcription factor 2 [Source:HGNC Symbol;Acc:HGNC:29535]
ENSG00000143036	126	123	141	277	292	314	111	105	121	159	223	189	protein_coding	1	94820342	94895246	SLC44A3	solute carrier family 44, member 3 [Source:HGNC Symbol;Acc:HGNC:28689]
ENSG00000143061	375	338	497	794	731	913	416	359	381	628	862	824	protein_coding	1	116574399	116667755	IGSF3	immunoglobulin superfamily, member 3 [Source:HGNC Symbol;Acc:HGNC:5950]
ENSG00000143067	259	282	303	170	172	203	280	260	307	122	164	147	protein_coding	1	119619422	119647773	ZNF697	zinc finger protein 697 [Source:HGNC Symbol;Acc:HGNC:32034]
ENSG00000143079	501	523	686	984	895	1166	477	463	576	621	798	785	protein_coding	1	112396181	112463456	CTTNBP2NL	CTTNBP2 N-terminal like [Source:HGNC Symbol;Acc:HGNC:25330]
ENSG00000143093	607	681	812	683	598	703	535	466	650	377	517	493	protein_coding	1	110031577	110074641	STRIP1	striatin interacting protein 1 [Source:HGNC Symbol;Acc:HGNC:25916]
ENSG00000143106	2641	2741	3250	2053	1991	2366	2286	2028	2586	1320	1733	1573	protein_coding	1	109399031	109426427	PSMA5	proteasome (prosome, macropain) subunit, alpha type, 5 [Source:HGNC Symbol;Acc:HGNC:9534]
ENSG00000143107	1	3	0	0	0	2	0	2	1	0	0	0	protein_coding	1	108712657	108742740	FNDC7	fibronectin type III domain containing 7 [Source:HGNC Symbol;Acc:HGNC:26668]
ENSG00000143110	5	4	3	4	6	4	2	5	6	4	2	3	protein_coding	1	111473792	111478512	C1orf162	chromosome 1 open reading frame 162 [Source:HGNC Symbol;Acc:HGNC:28344]
ENSG00000143126	1834	1817	2387	4023	3795	4302	1665	1536	2012	2404	3415	3260	protein_coding	1	109250019	109275750	CELSR2	cadherin, EGF LAG seven-pass G-type receptor 2 [Source:HGNC Symbol;Acc:HGNC:3231]
ENSG00000143127	24	24	24	25	15	26	26	22	25	8	8	12	protein_coding	1	145891208	145910189	ITGA10	integrin, alpha 10 [Source:HGNC Symbol;Acc:HGNC:6135]
ENSG00000143147	489	519	623	679	629	796	464	451	598	457	627	543	protein_coding	1	168079543	168137667	GPR161	G protein-coupled receptor 161 [Source:HGNC Symbol;Acc:HGNC:23694]
ENSG00000143149	2589	2470	3155	2819	2549	3261	2189	1972	2575	1554	2186	1985	protein_coding	1	165662216	165698863	ALDH9A1	aldehyde dehydrogenase 9 family, member A1 [Source:HGNC Symbol;Acc:HGNC:412]
ENSG00000143153	950	974	1240	4747	4417	5123	1077	992	1357	4896	6955	7127	protein_coding	1	169105697	169132722	ATP1B1	ATPase, Na+/K+ transporting, beta 1 polypeptide [Source:HGNC Symbol;Acc:HGNC:804]
ENSG00000143155	1302	1266	1737	1306	1090	1553	1265	1139	1466	802	1136	1022	protein_coding	1	168178933	168202114	TIPRL	TOR signaling pathway regulator [Source:HGNC Symbol;Acc:HGNC:30231]
ENSG00000143156	351	347	430	451	399	518	334	282	389	253	354	348	protein_coding	1	169132531	169367967	NME7	NME/NM23 family member 7 [Source:HGNC Symbol;Acc:HGNC:20461]
ENSG00000143157	2346	2330	2848	2312	2165	2535	1951	1851	2343	1404	1926	1871	protein_coding	1	166839447	166856344	POGK	pogo transposable element with KRAB domain [Source:HGNC Symbol;Acc:HGNC:18800]
ENSG00000143158	11350	11628	15387	4928	4325	5543	10578	9997	12962	2393	3220	3191	protein_coding	1	167916729	167937040	MPC2	mitochondrial pyruvate carrier 2 [Source:HGNC Symbol;Acc:HGNC:24515]
ENSG00000143162	1670	1708	2154	1495	1469	1860	1546	1403	1838	992	1312	1336	protein_coding	1	167529677	167553767	CREG1	cellular repressor of E1A-stimulated genes 1 [Source:HGNC Symbol;Acc:HGNC:2351]
ENSG00000143164	4915	5002	6408	3383	3050	3831	4478	4245	5288	1810	2480	2481	protein_coding	1	167935783	168075843	DCAF6	DDB1 and CUL4 associated factor 6 [Source:HGNC Symbol;Acc:HGNC:30002]
ENSG00000143167	4	9	1	9	9	7	0	1	5	2	3	2	protein_coding	1	167052836	167090631	GPA33	glycoprotein A33 (transmembrane) [Source:HGNC Symbol;Acc:HGNC:4445]
ENSG00000143171	1	2	0	1	0	0	0	0	0	2	1	3	protein_coding	1	165400917	165445355	RXRG	retinoid X receptor, gamma [Source:HGNC Symbol;Acc:HGNC:10479]
ENSG00000143178	24	17	21	31	28	28	12	11	21	16	14	23	protein_coding	1	168281040	168314426	TBX19	T-box 19 [Source:HGNC Symbol;Acc:HGNC:11596]
ENSG00000143179	2825	2935	3444	1965	1795	2059	2698	2432	3064	1414	1978	1862	protein_coding	1	165827531	165911618	UCK2	uridine-cytidine kinase 2 [Source:HGNC Symbol;Acc:HGNC:12562]
ENSG00000143183	2215	2184	2786	2580	2311	2999	1941	1683	2278	1452	1952	1953	protein_coding	1	165724293	165827755	TMCO1	transmembrane and coiled-coil domains 1 [Source:HGNC Symbol;Acc:HGNC:18188]
ENSG00000143185	0	0	0	0	0	0	0	0	1	0	0	0	protein_coding	1	168540765	168543997	XCL2	chemokine (C motif) ligand 2 [Source:HGNC Symbol;Acc:HGNC:10646]
ENSG00000143190	1307	1349	1631	1558	1385	1912	1147	1097	1244	1091	1420	1353	protein_coding	1	167220829	167427345	POU2F1	POU class 2 homeobox 1 [Source:HGNC Symbol;Acc:HGNC:9212]
ENSG00000143194	0	2	1	0	0	0	0	1	1	0	0	0	protein_coding	1	166975582	167022214	MAEL	maelstrom spermatogenic transposon silencer [Source:HGNC Symbol;Acc:HGNC:25929]
ENSG00000143195	13	19	15	5	3	12	21	29	19	7	4	8	protein_coding	1	166895711	166975482	ILDR2	immunoglobulin-like domain containing receptor 2 [Source:HGNC Symbol;Acc:HGNC:18131]
ENSG00000143198	628	681	849	730	710	804	581	577	698	475	646	625	protein_coding	1	165630861	165661796	MGST3	microsomal glutathione S-transferase 3 [Source:HGNC Symbol;Acc:HGNC:7064]
ENSG00000143199	6	8	10	5	7	6	8	8	13	3	7	7	protein_coding	1	167809388	167914215	ADCY10	adenylate cyclase 10 (soluble) [Source:HGNC Symbol;Acc:HGNC:21285]
ENSG00000143207	834	858	1046	801	754	953	769	714	864	560	754	715	protein_coding	1	175944831	176207493	RFWD2	ring finger and WD repeat domain 2, E3 ubiquitin protein ligase [Source:HGNC Symbol;Acc:HGNC:17440]
ENSG00000143217	287	307	325	332	310	361	190	189	231	155	226	231	protein_coding	1	161070995	161089599	PVRL4	poliovirus receptor-related 4 [Source:HGNC Symbol;Acc:HGNC:19688]
ENSG00000143222	1486	1498	1818	1253	1202	1402	1234	1149	1505	631	894	869	protein_coding	1	161152776	161158856	UFC1	ubiquitin-fold modifier conjugating enzyme 1 [Source:HGNC Symbol;Acc:HGNC:26941]
ENSG00000143224	269	330	372	372	417	435	252	214	300	224	339	283	protein_coding	1	161166410	161178013	PPOX	protoporphyrinogen oxidase [Source:HGNC Symbol;Acc:HGNC:9280]
ENSG00000143226	3	4	8	6	6	8	3	7	7	8	10	7	protein_coding	1	161505430	161524013	FCGR2A	Fc fragment of IgG, low affinity IIa, receptor (CD32) [Source:HGNC Symbol;Acc:HGNC:3616]
ENSG00000143228	1124	1126	1516	1068	948	1173	1041	964	1227	780	1106	1070	protein_coding	1	163266576	163355764	NUF2	NUF2, NDC80 kinetochore complex component [Source:HGNC Symbol;Acc:HGNC:14621]
ENSG00000143248	27	30	38	30	29	29	27	27	31	17	36	28	protein_coding	1	163111121	163321791	RGS5	regulator of G-protein signaling 5 [Source:HGNC Symbol;Acc:HGNC:10001]
ENSG00000143252	3692	3709	4510	4303	4017	4835	3124	2785	3597	2596	3441	3241	protein_coding	1	161314257	161375340	SDHC	succinate dehydrogenase complex, subunit C, integral membrane protein, 15kDa [Source:HGNC Symbol;Acc:HGNC:10682]
ENSG00000143256	1220	1226	1662	848	812	891	1058	1006	1330	546	714	754	protein_coding	1	161100556	161118111	PFDN2	prefoldin subunit 2 [Source:HGNC Symbol;Acc:HGNC:8867]
ENSG00000143257	0	1	2	1	0	0	1	0	2	0	1	0	protein_coding	1	161229666	161238302	NR1I3	nuclear receptor subfamily 1, group I, member 3 [Source:HGNC Symbol;Acc:HGNC:7969]
ENSG00000143258	865	896	1047	1142	1084	1205	677	586	876	649	930	877	protein_coding	1	161159450	161165723	USP21	ubiquitin specific peptidase 21 [Source:HGNC Symbol;Acc:HGNC:12620]
ENSG00000143278	0	0	1	0	0	0	0	0	1	0	0	0	protein_coding	1	197039191	197067267	F13B	coagulation factor XIII, B polypeptide [Source:HGNC Symbol;Acc:HGNC:3534]
ENSG00000143294	1488	1480	1957	1631	1470	1735	1263	1202	1532	910	1271	1202	protein_coding	1	156750610	156800817	PRCC	papillary renal cell carcinoma (translocation-associated) [Source:HGNC Symbol;Acc:HGNC:9343]
ENSG00000143297	0	0	0	0	0	1	0	0	0	0	0	0	protein_coding	1	157513377	157552520	FCRL5	Fc receptor-like 5 [Source:HGNC Symbol;Acc:HGNC:18508]
ENSG00000143303	631	678	869	770	725	755	600	494	721	443	602	554	protein_coding	1	156728442	156736960	RRNAD1	ribosomal RNA adenine dimethylase domain containing 1 [Source:HGNC Symbol;Acc:HGNC:24273]
ENSG00000143314	3033	3007	3814	2611	2379	2787	2573	2445	3141	1654	2321	2202	protein_coding	1	156737303	156741590	MRPL24	mitochondrial ribosomal protein L24 [Source:HGNC Symbol;Acc:HGNC:14037]
ENSG00000143315	1182	1206	1486	1035	999	1261	963	902	1144	610	766	770	protein_coding	1	160027673	160031991	PIGM	phosphatidylinositol glycan anchor biosynthesis, class M [Source:HGNC Symbol;Acc:HGNC:18858]
ENSG00000143318	1	2	0	1	0	2	0	2	1	0	0	1	protein_coding	1	160190556	160201886	CASQ1	calsequestrin 1 (fast-twitch, skeletal muscle) [Source:HGNC Symbol;Acc:HGNC:1512]
ENSG00000143319	1932	2098	2582	1570	1433	1866	1729	1601	2152	1007	1277	1221	protein_coding	1	156721891	156728799	ISG20L2	interferon stimulated exonuclease gene 20kDa-like 2 [Source:HGNC Symbol;Acc:HGNC:25745]
ENSG00000143320	15	18	29	6	15	5	10	14	15	5	10	3	protein_coding	1	156699606	156705816	CRABP2	cellular retinoic acid binding protein 2 [Source:HGNC Symbol;Acc:HGNC:2339]
ENSG00000143321	8087	8156	10387	6934	6624	7748	7739	7176	9141	5019	6984	6544	protein_coding	1	156742107	156766925	HDGF	hepatoma-derived growth factor [Source:HGNC Symbol;Acc:HGNC:4856]
ENSG00000143322	826	803	1028	844	813	984	724	693	878	616	775	775	protein_coding	1	179099327	179229684	ABL2	ABL proto-oncogene 2, non-receptor tyrosine kinase [Source:HGNC Symbol;Acc:HGNC:77]
ENSG00000143324	1235	1323	1604	1223	1069	1377	1180	1108	1426	846	1060	1111	protein_coding	1	180632004	180890251	XPR1	xenotropic and polytropic retrovirus receptor 1 [Source:HGNC Symbol;Acc:HGNC:12827]
ENSG00000143333	3	11	9	8	5	11	3	5	7	5	12	8	protein_coding	1	182598623	182604408	RGS16	regulator of G-protein signaling 16 [Source:HGNC Symbol;Acc:HGNC:9997]
ENSG00000143337	1317	1324	1663	1574	1441	1832	1067	967	1268	848	1159	1065	protein_coding	1	179882042	179925000	TOR1AIP1	torsin A interacting protein 1 [Source:HGNC Symbol;Acc:HGNC:29456]
ENSG00000143340	2	1	0	0	0	0	0	0	0	0	0	0	protein_coding	1	179743163	179816198	FAM163A	family with sequence similarity 163, member A [Source:HGNC Symbol;Acc:HGNC:28274]
ENSG00000143341	0	0	1	4	5	9	0	0	1	4	5	10	protein_coding	1	185734551	186190949	HMCN1	hemicentin 1 [Source:HGNC Symbol;Acc:HGNC:19194]
ENSG00000143344	159	170	220	297	274	317	131	142	191	196	281	230	protein_coding	1	183636085	183928531	RGL1	ral guanine nucleotide dissociation stimulator-like 1 [Source:HGNC Symbol;Acc:HGNC:30281]
ENSG00000143353	1070	1119	1355	686	628	781	925	817	1102	401	536	545	protein_coding	1	219173844	219212865	LYPLAL1	lysophospholipase-like 1 [Source:HGNC Symbol;Acc:HGNC:20440]
ENSG00000143355	2	1	0	0	0	0	1	2	1	1	1	1	protein_coding	1	197911902	197935478	LHX9	LIM homeobox 9 [Source:HGNC Symbol;Acc:HGNC:14222]
ENSG00000143363	864	892	1111	1014	916	1129	785	717	902	587	769	768	protein_coding	1	151008420	151035713	PRUNE	prune exopolyphosphatase [Source:HGNC Symbol;Acc:HGNC:13420]
ENSG00000143365	181	201	228	217	238	246	172	156	233	147	193	188	protein_coding	1	151806071	151831872	RORC	RAR-related orphan receptor C [Source:HGNC Symbol;Acc:HGNC:10260]
ENSG00000143367	731	716	900	706	642	821	540	506	637	381	558	519	protein_coding	1	151540305	151583583	TUFT1	tuftelin 1 [Source:HGNC Symbol;Acc:HGNC:12422]
ENSG00000143368	2394	2338	3189	2125	2031	2411	1999	2057	2442	1230	1715	1621	protein_coding	1	149923317	149928344	SF3B4	splicing factor 3b, subunit 4, 49kDa [Source:HGNC Symbol;Acc:HGNC:10771]
ENSG00000143369	19	16	24	16	12	14	20	11	16	3	17	6	protein_coding	1	150508062	150513789	ECM1	extracellular matrix protein 1 [Source:HGNC Symbol;Acc:HGNC:3153]
ENSG00000143373	586	646	821	947	866	1017	542	483	634	541	743	686	protein_coding	1	151281618	151292180	ZNF687	zinc finger protein 687 [Source:HGNC Symbol;Acc:HGNC:29277]
ENSG00000143374	1161	1136	1483	1069	950	1160	1039	999	1238	759	1096	967	protein_coding	1	150487364	150507609	TARS2	threonyl-tRNA synthetase 2, mitochondrial (putative) [Source:HGNC Symbol;Acc:HGNC:30740]
ENSG00000143375	705	701	911	753	737	787	593	606	719	442	647	601	protein_coding	1	151510510	151538692	CGN	cingulin [Source:HGNC Symbol;Acc:HGNC:17429]
ENSG00000143376	1260	1326	1683	1424	1265	1570	1064	986	1285	917	1225	1228	protein_coding	1	151612065	151699091	SNX27	sorting nexin family member 27 [Source:HGNC Symbol;Acc:HGNC:20073]
ENSG00000143379	1387	1459	1826	1610	1398	1723	1206	1211	1483	987	1453	1381	protein_coding	1	150926263	150964744	SETDB1	SET domain, bifurcated 1 [Source:HGNC Symbol;Acc:HGNC:10761]
ENSG00000143382	26	20	28	106	105	115	20	19	15	28	65	60	protein_coding	1	150549369	150560937	ADAMTSL4	ADAMTS-like 4 [Source:HGNC Symbol;Acc:HGNC:19706]
ENSG00000143384	4027	3912	5138	5421	4804	5977	3372	3218	3979	3227	4465	4211	protein_coding	1	150574551	150579738	MCL1	myeloid cell leukemia 1 [Source:HGNC Symbol;Acc:HGNC:6943]
ENSG00000143387	72	87	115	112	144	166	75	63	56	69	74	103	protein_coding	1	150796208	150808323	CTSK	cathepsin K [Source:HGNC Symbol;Acc:HGNC:2536]
ENSG00000143390	2302	2215	2826	2202	2133	2522	1990	1825	2354	1555	2213	1948	protein_coding	1	151340640	151347357	RFX5	regulatory factor X, 5 (influences HLA class II expression) [Source:HGNC Symbol;Acc:HGNC:9986]
ENSG00000143393	2133	2171	2821	2471	2396	2774	1834	1615	2133	1347	1869	1774	protein_coding	1	151291797	151327715	PI4KB	phosphatidylinositol 4-kinase, catalytic, beta [Source:HGNC Symbol;Acc:HGNC:8984]
ENSG00000143398	2639	2788	3481	2630	2396	2946	2258	2089	2690	1546	2181	2052	protein_coding	1	151197949	151249536	PIP5K1A	phosphatidylinositol-4-phosphate 5-kinase, type I, alpha [Source:HGNC Symbol;Acc:HGNC:8994]
ENSG00000143401	1781	1802	2249	2188	1921	2460	2124	1835	2458	1900	2640	2483	protein_coding	1	150218417	150236156	ANP32E	acidic (leucine-rich) nuclear phosphoprotein 32 family, member E [Source:HGNC Symbol;Acc:HGNC:16673]
ENSG00000143409	35	29	55	46	37	53	34	25	37	16	29	37	protein_coding	1	150996086	151008375	FAM63A	family with sequence similarity 63, member A [Source:HGNC Symbol;Acc:HGNC:25648]
ENSG00000143412	94	84	102	434	398	516	65	78	87	244	352	318	protein_coding	1	150982017	150995634	ANXA9	annexin A9 [Source:HGNC Symbol;Acc:HGNC:547]
ENSG00000143416	5679	5736	7159	21317	20476	24067	4530	3926	5136	8017	11229	10733	protein_coding	1	151364302	151372733	SELENBP1	selenium binding protein 1 [Source:HGNC Symbol;Acc:HGNC:10719]
ENSG00000143418	4730	4759	5912	6164	5681	7161	4179	3773	4787	3460	4631	4381	protein_coding	1	150960583	150975004	CERS2	ceramide synthase 2 [Source:HGNC Symbol;Acc:HGNC:14076]
ENSG00000143420	3518	3554	4374	4277	4012	4759	2927	2772	3400	2338	3346	3040	protein_coding	1	150600851	150629612	ENSA	endosulfine alpha [Source:HGNC Symbol;Acc:HGNC:3360]
ENSG00000143434	58	66	95	99	105	89	66	65	67	67	80	90	protein_coding	1	151131685	151146664	SEMA6C	sema domain, transmembrane domain (TM), and cytoplasmic domain, (semaphorin) 6C [Source:HGNC Symbol;Acc:HGNC:10740]
ENSG00000143436	1085	1022	1452	989	979	1068	982	956	1189	600	827	755	protein_coding	1	151759643	151763564	MRPL9	mitochondrial ribosomal protein L9 [Source:HGNC Symbol;Acc:HGNC:14277]
ENSG00000143437	1525	1655	2033	1945	1613	2062	1313	1226	1579	1126	1537	1428	protein_coding	1	150809705	150876768	ARNT	aryl hydrocarbon receptor nuclear translocator [Source:HGNC Symbol;Acc:HGNC:700]
ENSG00000143442	2344	2307	2937	3023	2858	3384	1811	1751	2229	1721	2443	2359	protein_coding	1	151402724	151459465	POGZ	pogo transposable element with ZNF domain [Source:HGNC Symbol;Acc:HGNC:18801]
ENSG00000143443	0	0	2	1	2	5	1	0	1	0	0	1	protein_coding	1	151047740	151051986	C1orf56	chromosome 1 open reading frame 56 [Source:HGNC Symbol;Acc:HGNC:26045]
ENSG00000143450	140	159	178	100	79	117	114	93	145	49	72	72	protein_coding	1	151762969	151771332	OAZ3	ornithine decarboxylase antizyme 3 [Source:HGNC Symbol;Acc:HGNC:8097]
ENSG00000143457	843	882	1077	1406	1254	1594	719	680	828	800	1067	1013	protein_coding	1	150646225	150697144	GOLPH3L	golgi phosphoprotein 3-like [Source:HGNC Symbol;Acc:HGNC:24882]
ENSG00000143458	939	993	1223	887	808	1087	699	731	874	546	720	727	protein_coding	1	151070578	151125542	GABPB2	GA binding protein transcription factor, beta subunit 2 [Source:HGNC Symbol;Acc:HGNC:28441]
ENSG00000143469	0	0	1	0	0	0	0	0	0	0	0	0	protein_coding	1	209938174	210171315	SYT14	synaptotagmin XIV [Source:HGNC Symbol;Acc:HGNC:23143]
ENSG00000143473	0	3	0	0	0	1	0	0	0	0	0	0	protein_coding	1	210678315	211134115	KCNH1	potassium voltage-gated channel, subfamily H (eag-related), member 1 [Source:HGNC Symbol;Acc:HGNC:6250]
ENSG00000143476	1651	1669	2142	1333	1144	1601	1450	1403	1772	800	1095	1089	protein_coding	1	212035553	212107400	DTL	denticleless E3 ubiquitin protein ligase homolog (Drosophila) [Source:HGNC Symbol;Acc:HGNC:30288]
ENSG00000143479	78	75	100	165	159	199	71	61	97	97	168	137	protein_coding	1	206635536	206684419	DYRK3	dual-specificity tyrosine-(Y)-phosphorylation regulated kinase 3 [Source:HGNC Symbol;Acc:HGNC:3094]
ENSG00000143486	1001	1047	1293	869	841	1037	1022	883	1130	677	992	817	protein_coding	1	206571292	206612463	EIF2D	eukaryotic translation initiation factor 2D [Source:HGNC Symbol;Acc:HGNC:6583]
ENSG00000143493	1033	1065	1244	961	854	1060	795	740	903	523	678	633	protein_coding	1	211940399	212035542	INTS7	integrator complex subunit 7 [Source:HGNC Symbol;Acc:HGNC:24484]
ENSG00000143494	481	496	672	456	392	465	594	552	677	422	521	483	protein_coding	1	212950520	212992037	VASH2	vasohibin 2 [Source:HGNC Symbol;Acc:HGNC:25723]
ENSG00000143498	182	167	226	132	119	159	160	140	200	84	94	103	protein_coding	1	222557902	222589933	TAF1A	TATA box binding protein (TBP)-associated factor, RNA polymerase I, A, 48kDa [Source:HGNC Symbol;Acc:HGNC:11532]
ENSG00000143499	149	177	172	45	42	50	136	118	174	35	43	61	protein_coding	1	214281102	214337131	SMYD2	SET and MYND domain containing 2 [Source:HGNC Symbol;Acc:HGNC:20982]
ENSG00000143502	128	116	133	569	519	662	97	90	108	294	386	383	protein_coding	1	223220819	223364202	SUSD4	sushi domain containing 4 [Source:HGNC Symbol;Acc:HGNC:25470]
ENSG00000143507	57	48	79	74	58	96	58	52	55	40	46	38	protein_coding	1	221701424	221742176	DUSP10	dual specificity phosphatase 10 [Source:HGNC Symbol;Acc:HGNC:3065]
ENSG00000143512	7	10	9	2	1	5	4	4	3	2	1	5	protein_coding	1	222522258	222548103	HHIPL2	HHIP-like 2 [Source:HGNC Symbol;Acc:HGNC:25842]
ENSG00000143514	896	1001	1203	1045	909	1181	848	811	1052	704	969	961	protein_coding	1	223779899	223845972	TP53BP2	tumor protein p53 binding protein 2 [Source:HGNC Symbol;Acc:HGNC:12000]
ENSG00000143515	288	320	386	396	381	434	301	274	355	244	328	302	protein_coding	1	154325553	154351307	ATP8B2	ATPase, aminophospholipid transporter, class I, type 8B, member 2 [Source:HGNC Symbol;Acc:HGNC:13534]
ENSG00000143537	4559	4571	5647	6664	6639	7977	4046	3568	4501	4360	6024	5739	protein_coding	1	155050566	155062775	ADAM15	ADAM metallopeptidase domain 15 [Source:HGNC Symbol;Acc:HGNC:193]
ENSG00000143543	2562	2559	3100	2296	2187	2569	2227	1966	2636	1389	1819	1721	protein_coding	1	153974269	153977688	JTB	jumping translocation breakpoint [Source:HGNC Symbol;Acc:HGNC:6201]
ENSG00000143545	1681	1705	2226	1708	1668	1999	1486	1282	1672	973	1355	1271	protein_coding	1	153981617	153986358	RAB13	RAB13, member RAS oncogene family [Source:HGNC Symbol;Acc:HGNC:9762]
ENSG00000143549	5683	5870	7282	5617	5234	6787	5329	4901	6361	3500	4523	4416	protein_coding	1	154155304	154194648	TPM3	tropomyosin 3 [Source:HGNC Symbol;Acc:HGNC:12012]
ENSG00000143552	1	0	2	2	2	3	0	1	0	2	2	2	protein_coding	1	153992685	154155116	NUP210L	nucleoporin 210kDa-like [Source:HGNC Symbol;Acc:HGNC:29915]
ENSG00000143553	768	809	962	766	800	906	612	573	772	412	585	576	protein_coding	1	153658654	153661830	SNAPIN	SNAP-associated protein [Source:HGNC Symbol;Acc:HGNC:17145]
ENSG00000143554	240	273	336	317	360	274	187	161	224	130	212	187	protein_coding	1	153774354	153780157	SLC27A3	solute carrier family 27 (fatty acid transporter), member 3 [Source:HGNC Symbol;Acc:HGNC:10997]
ENSG00000143569	6209	6194	8163	6766	5978	7133	5111	5071	6312	3660	5289	5250	protein_coding	1	154220179	154271510	UBAP2L	ubiquitin associated protein 2-like [Source:HGNC Symbol;Acc:HGNC:29877]
ENSG00000143570	2195	2281	2886	2043	1916	2322	1950	1801	2237	1222	1643	1509	protein_coding	1	153959099	153968184	SLC39A1	solute carrier family 39 (zinc transporter), member 1 [Source:HGNC Symbol;Acc:HGNC:12876]
ENSG00000143575	3429	3439	4417	2792	2597	3212	3242	2793	3656	1933	2571	2513	protein_coding	1	154272511	154275875	HAX1	HCLS1 associated protein X-1 [Source:HGNC Symbol;Acc:HGNC:16915]
ENSG00000143578	2007	2170	2691	1220	1242	1297	1761	1537	2156	726	1001	941	protein_coding	1	153967534	153974363	CREB3L4	cAMP responsive element binding protein 3-like 4 [Source:HGNC Symbol;Acc:HGNC:18854]
ENSG00000143590	140	160	208	378	369	443	130	159	154	210	317	274	protein_coding	1	155078872	155087538	EFNA3	ephrin-A3 [Source:HGNC Symbol;Acc:HGNC:3223]
ENSG00000143603	4	2	3	10	6	7	0	3	3	6	8	11	protein_coding	1	154697455	154870280	KCNN3	potassium intermediate/small conductance calcium-activated channel, subfamily N, member 3 [Source:HGNC Symbol;Acc:HGNC:6292]
ENSG00000143612	6467	6553	8124	6220	5877	7195	6029	5162	6740	3910	5426	5062	protein_coding	1	154206706	154220628	C1orf43	chromosome 1 open reading frame 43 [Source:HGNC Symbol;Acc:HGNC:29876]
ENSG00000143614	974	1021	1267	1405	1240	1471	873	857	1019	884	1167	1124	protein_coding	1	153804725	153922975	GATAD2B	GATA zinc finger domain containing 2B [Source:HGNC Symbol;Acc:HGNC:30778]
ENSG00000143621	6760	6840	8495	5467	5182	6065	6105	5777	7363	3659	5084	4764	protein_coding	1	153661788	153671048	ILF2	interleukin enhancer binding factor 2 [Source:HGNC Symbol;Acc:HGNC:6037]
ENSG00000143622	441	489	595	550	499	631	299	316	431	290	369	321	protein_coding	1	155897808	155911404	RIT1	Ras-like without CAAX 1 [Source:HGNC Symbol;Acc:HGNC:10023]
ENSG00000143624	3074	3097	3892	3707	3794	4113	2375	2114	2837	1952	2932	2768	protein_coding	1	153728067	153774808	INTS3	integrator complex subunit 3 [Source:HGNC Symbol;Acc:HGNC:26153]
ENSG00000143627	0	0	0	0	0	0	0	2	0	0	0	0	protein_coding	1	155289839	155301434	PKLR	pyruvate kinase, liver and RBC [Source:HGNC Symbol;Acc:HGNC:9020]
ENSG00000143630	63	68	65	133	143	165	47	49	71	58	124	109	protein_coding	1	155277583	155289848	HCN3	hyperpolarization activated cyclic nucleotide-gated potassium channel 3 [Source:HGNC Symbol;Acc:HGNC:19183]
ENSG00000143632	1	0	7	1	3	2	1	2	0	0	0	3	protein_coding	1	229431245	229434098	ACTA1	actin, alpha 1, skeletal muscle [Source:HGNC Symbol;Acc:HGNC:129]
ENSG00000143633	423	459	586	384	370	445	404	361	485	276	354	370	protein_coding	1	231223763	231241187	C1orf131	chromosome 1 open reading frame 131 [Source:HGNC Symbol;Acc:HGNC:25332]
ENSG00000143641	2138	2111	2744	2844	2671	3201	1739	1652	2138	1648	2425	2236	protein_coding	1	230057990	230282124	GALNT2	polypeptide N-acetylgalactosaminyltransferase 2 [Source:HGNC Symbol;Acc:HGNC:4124]
ENSG00000143643	458	471	601	563	482	575	429	374	503	328	470	438	protein_coding	1	230906243	230978875	TTC13	tetratricopeptide repeat domain 13 [Source:HGNC Symbol;Acc:HGNC:26204]
ENSG00000143653	1333	1257	1585	1725	1530	1960	1068	1018	1232	930	1239	1193	protein_coding	1	246724047	246768137	SCCPDH	saccharopine dehydrogenase (putative) [Source:HGNC Symbol;Acc:HGNC:24275]
ENSG00000143669	207	220	272	526	422	581	187	171	190	256	343	345	protein_coding	1	235661041	235883640	LYST	lysosomal trafficking regulator [Source:HGNC Symbol;Acc:HGNC:1968]
ENSG00000143674	417	446	558	546	452	583	432	443	536	405	608	635	protein_coding	1	233327768	233385148	MLK4	Mitogen-activated protein kinase kinase kinase MLK4 [Source:UniProtKB/Swiss-Prot;Acc:Q5TCX8]
ENSG00000143702	497	489	572	604	525	624	414	397	486	353	552	510	protein_coding	1	243124428	243255406	CEP170	centrosomal protein 170kDa [Source:HGNC Symbol;Acc:HGNC:28920]
ENSG00000143740	862	875	1069	1324	1378	1580	673	634	837	701	1040	996	protein_coding	1	227728539	227781231	SNAP47	synaptosomal-associated protein, 47kDa [Source:HGNC Symbol;Acc:HGNC:30669]
ENSG00000143742	6313	6335	7639	6981	6557	8503	6003	5047	6780	4562	6126	5852	protein_coding	1	225777813	225790466	SRP9	signal recognition particle 9kDa [Source:HGNC Symbol;Acc:HGNC:11304]
ENSG00000143748	1977	2172	2525	1670	1553	1981	1693	1523	1977	807	1123	1082	protein_coding	1	224227334	224330387	NVL	nuclear VCP-like [Source:HGNC Symbol;Acc:HGNC:8070]
ENSG00000143751	1318	1326	1696	1205	1069	1431	1160	1090	1415	750	1074	983	protein_coding	1	225982702	225999331	SDE2	SDE2 telomere maintenance homolog (S. pombe) [Source:HGNC Symbol;Acc:HGNC:26643]
ENSG00000143753	6996	7371	9040	4479	4042	5239	5898	5561	7111	2039	2744	2841	protein_coding	1	224175756	224193441	DEGS1	delta(4)-desaturase, sphingolipid 1 [Source:HGNC Symbol;Acc:HGNC:13709]
ENSG00000143756	2869	2894	3536	2428	2289	3081	2495	2201	2918	1367	1731	1634	protein_coding	1	224114087	224162047	FBXO28	F-box protein 28 [Source:HGNC Symbol;Acc:HGNC:29046]
ENSG00000143761	12031	12120	15295	9774	9054	10978	10423	9310	12133	6014	8369	8231	protein_coding	1	228082660	228099212	ARF1	ADP-ribosylation factor 1 [Source:HGNC Symbol;Acc:HGNC:652]
ENSG00000143771	1112	1190	1415	1192	1052	1286	1097	950	1276	694	949	937	protein_coding	1	224356850	224379459	CNIH4	cornichon family AMPA receptor auxiliary protein 4 [Source:HGNC Symbol;Acc:HGNC:25013]
ENSG00000143772	765	735	904	963	940	1118	591	578	652	556	736	697	protein_coding	1	226631690	226739323	ITPKB	inositol-trisphosphate 3-kinase B [Source:HGNC Symbol;Acc:HGNC:6179]
ENSG00000143774	2506	2534	3259	2729	2614	3064	2232	2060	2548	1438	2062	2021	protein_coding	1	228139962	228148984	GUK1	guanylate kinase 1 [Source:HGNC Symbol;Acc:HGNC:4693]
ENSG00000143776	3993	3906	5045	4234	3701	4879	3357	3108	4041	2911	3821	3596	protein_coding	1	226989865	227318474	CDC42BPA	CDC42 binding protein kinase alpha (DMPK-like) [Source:HGNC Symbol;Acc:HGNC:1737]
ENSG00000143786	3	8	8	20	20	21	1	2	4	10	14	16	protein_coding	1	224434660	224740549	CNIH3	cornichon family AMPA receptor auxiliary protein 3 [Source:HGNC Symbol;Acc:HGNC:26802]
ENSG00000143793	427	438	511	439	444	460	318	296	426	261	372	333	protein_coding	1	228100726	228105411	C1orf35	chromosome 1 open reading frame 35 [Source:HGNC Symbol;Acc:HGNC:19032]
ENSG00000143799	12763	12929	16869	10995	9680	11972	11475	10716	13553	6846	9374	9166	protein_coding	1	226360691	226408075	PARP1	poly (ADP-ribose) polymerase 1 [Source:HGNC Symbol;Acc:HGNC:270]
ENSG00000143801	639	640	852	790	735	903	579	490	676	397	603	563	protein_coding	1	226870184	226896102	PSEN2	presenilin 2 [Source:HGNC Symbol;Acc:HGNC:9509]
ENSG00000143811	1179	1152	1474	1137	1160	1402	950	836	1098	751	1065	947	protein_coding	1	225919877	225924340	PYCR2	pyrroline-5-carboxylate reductase family, member 2 [Source:HGNC Symbol;Acc:HGNC:30262]
ENSG00000143815	3012	2968	3739	2057	1896	2285	2839	2538	3304	1715	2279	2191	protein_coding	1	225401502	225428925	LBR	lamin B receptor [Source:HGNC Symbol;Acc:HGNC:6518]
ENSG00000143816	6	7	13	68	77	102	5	12	10	35	42	39	protein_coding	1	227918656	227947898	WNT9A	wingless-type MMTV integration site family, member 9A [Source:HGNC Symbol;Acc:HGNC:12778]
ENSG00000143819	5491	5496	6888	6850	6827	8059	4945	4820	5977	4195	5863	5457	protein_coding	1	225810092	225845563	EPHX1	epoxide hydrolase 1, microsomal (xenobiotic) [Source:HGNC Symbol;Acc:HGNC:3401]
ENSG00000143839	7	10	8	3	3	5	3	6	9	5	5	2	protein_coding	1	204154819	204166322	REN	renin [Source:HGNC Symbol;Acc:HGNC:9958]
ENSG00000143842	410	398	545	419	416	457	375	368	456	286	401	396	protein_coding	1	204073115	204127743	SOX13	SRY (sex determining region Y)-box 13 [Source:HGNC Symbol;Acc:HGNC:11192]
ENSG00000143845	2	1	3	6	4	8	2	1	5	0	9	7	protein_coding	1	204131062	204152003	ETNK2	ethanolamine kinase 2 [Source:HGNC Symbol;Acc:HGNC:25575]
ENSG00000143847	54	65	64	91	92	88	45	77	65	46	81	101	protein_coding	1	203026498	203078740	PPFIA4	protein tyrosine phosphatase, receptor type, f polypeptide (PTPRF), interacting protein (liprin), alpha 4 [Source:HGNC Symbol;Acc:HGNC:9248]
ENSG00000143850	326	308	396	306	293	334	322	337	374	233	378	318	protein_coding	1	204218851	204377665	PLEKHA6	pleckstrin homology domain containing, family A member 6 [Source:HGNC Symbol;Acc:HGNC:17053]
ENSG00000143851	0	1	0	0	1	1	2	1	1	0	2	1	protein_coding	1	202147013	202161588	PTPN7	protein tyrosine phosphatase, non-receptor type 7 [Source:HGNC Symbol;Acc:HGNC:9659]
ENSG00000143858	0	0	1	0	1	0	0	0	0	2	1	1	protein_coding	1	202590596	202710417	SYT2	synaptotagmin II [Source:HGNC Symbol;Acc:HGNC:11510]
ENSG00000143862	546	528	766	782	696	834	470	510	604	441	664	612	protein_coding	1	202133404	202144743	ARL8A	ADP-ribosylation factor-like 8A [Source:HGNC Symbol;Acc:HGNC:25192]
ENSG00000146463	2372	2383	3040	3007	2514	3361	2035	1849	2398	1715	2318	2367	protein_coding	1	35268967	35422058	ZMYM4	zinc finger, MYM-type 4 [Source:HGNC Symbol;Acc:HGNC:13055]
ENSG00000149527	38	41	54	88	85	82	47	28	37	37	42	32	protein_coding	1	2425980	2505530	PLCH2	phospholipase C, eta 2 [Source:HGNC Symbol;Acc:HGNC:29037]
ENSG00000151414	1506	1504	1986	1633	1439	1839	1358	1276	1529	1033	1412	1404	protein_coding	1	198156963	198322420	NEK7	NIMA-related kinase 7 [Source:HGNC Symbol;Acc:HGNC:13386]
ENSG00000152061	446	376	491	491	497	610	362	326	415	318	406	432	protein_coding	1	174159410	174995308	RABGAP1L	RAB GTPase activating protein 1-like [Source:HGNC Symbol;Acc:HGNC:24663]
ENSG00000152078	451	397	536	798	693	828	441	414	466	518	709	658	protein_coding	1	95117338	95197607	TMEM56	transmembrane protein 56 [Source:HGNC Symbol;Acc:HGNC:26477]
ENSG00000152092	6	11	11	9	9	14	15	11	23	16	21	14	protein_coding	1	176857302	177164973	ASTN1	astrotactin 1 [Source:HGNC Symbol;Acc:HGNC:773]
ENSG00000152104	577	504	641	765	657	900	598	507	608	694	947	871	protein_coding	1	214348696	214552449	PTPN14	protein tyrosine phosphatase, non-receptor type 14 [Source:HGNC Symbol;Acc:HGNC:9647]
ENSG00000152332	8191	8421	10340	8273	7417	10078	7527	6643	8478	5605	6964	6723	protein_coding	1	162497251	162529629	UHMK1	U2AF homology motif (UHM) kinase 1 [Source:HGNC Symbol;Acc:HGNC:19683]
ENSG00000152382	447	431	583	457	392	444	361	357	461	279	382	366	protein_coding	1	166856510	166876327	TADA1	transcriptional adaptor 1 [Source:HGNC Symbol;Acc:HGNC:30631]
ENSG00000152763	10	8	11	14	14	19	8	10	12	5	10	12	protein_coding	1	66812885	66924887	WDR78	WD repeat domain 78 [Source:HGNC Symbol;Acc:HGNC:26252]
ENSG00000152904	1217	1220	1641	974	883	1131	1084	1094	1283	617	799	760	protein_coding	1	235327350	235344532	GGPS1	geranylgeranyl diphosphate synthase 1 [Source:HGNC Symbol;Acc:HGNC:4249]
ENSG00000153029	194	194	232	230	205	237	168	142	173	128	182	146	protein_coding	1	181033425	181061938	MR1	major histocompatibility complex, class I-related [Source:HGNC Symbol;Acc:HGNC:4975]
ENSG00000153187	12908	13179	16664	13438	12110	15014	10860	10575	13311	8233	11224	10995	protein_coding	1	244851166	244864542	HNRNPU	heterogeneous nuclear ribonucleoprotein U (scaffold attachment factor A) [Source:HGNC Symbol;Acc:HGNC:5048]
ENSG00000153207	2834	2872	3627	2601	2422	2946	2542	2246	2813	1692	2158	2193	protein_coding	1	246839098	246931978	AHCTF1	AT hook containing transcription factor 1 [Source:HGNC Symbol;Acc:HGNC:24618]
ENSG00000153230	0	0	0	1	1	0	0	0	0	0	0	0	protein_coding	1	247738615	247739559	OR14K1	olfactory receptor, family 14, subfamily K, member 1 [Source:HGNC Symbol;Acc:HGNC:15025]
ENSG00000153363	494	501	615	450	421	493	444	385	556	277	408	373	lincRNA	1	211382803	211435333	LINC00467	long intergenic non-protein coding RNA 467 [Source:HGNC Symbol;Acc:HGNC:28227]
ENSG00000153898	172	170	173	147	157	164	161	122	155	112	153	126	protein_coding	1	84925583	84997113	MCOLN2	mucolipin 2 [Source:HGNC Symbol;Acc:HGNC:13357]
ENSG00000153904	2896	3081	3741	3957	3609	4555	2781	2670	3385	2782	3707	3735	protein_coding	1	85318481	85578363	DDAH1	dimethylarginine dimethylaminohydrolase 1 [Source:HGNC Symbol;Acc:HGNC:2715]
ENSG00000153936	592	574	781	874	781	1072	608	534	712	666	900	812	protein_coding	1	86914648	87109998	HS2ST1	heparan sulfate 2-O-sulfotransferase 1 [Source:HGNC Symbol;Acc:HGNC:5193]
ENSG00000154027	66	66	96	39	34	73	56	50	65	34	42	43	protein_coding	1	77282051	77559969	AK5	adenylate kinase 5 [Source:HGNC Symbol;Acc:HGNC:365]
ENSG00000154222	1071	1159	1446	1131	1046	1241	888	791	1090	552	846	771	protein_coding	1	52345723	52366193	CC2D1B	coiled-coil and C2 domain containing 1B [Source:HGNC Symbol;Acc:HGNC:29386]
ENSG00000154305	4735	4904	6242	6836	6130	7756	4493	4224	5313	4010	5549	5426	protein_coding	1	222618086	222668012	MIA3	melanoma inhibitory activity family, member 3 [Source:HGNC Symbol;Acc:HGNC:24008]
ENSG00000154309	74	73	122	126	104	140	55	47	52	49	55	65	protein_coding	1	222872271	223005995	DISP1	dispatched homolog 1 (Drosophila) [Source:HGNC Symbol;Acc:HGNC:19711]
ENSG00000154342	0	0	0	0	0	0	0	0	0	1	0	0	protein_coding	1	228007051	228061260	WNT3A	wingless-type MMTV integration site family, member 3A [Source:HGNC Symbol;Acc:HGNC:15983]
ENSG00000154358	292	279	383	1014	1032	994	231	227	276	456	646	622	protein_coding	1	228208130	228378876	OBSCN	obscurin, cytoskeletal calmodulin and titin-interacting RhoGEF [Source:HGNC Symbol;Acc:HGNC:15719]
ENSG00000154370	1115	1171	1494	969	874	1053	984	876	1098	602	910	850	protein_coding	1	228393673	228406840	TRIM11	tripartite motif containing 11 [Source:HGNC Symbol;Acc:HGNC:16281]
ENSG00000154380	3711	3825	4719	3899	3454	4497	3448	3148	3911	2780	3594	3488	protein_coding	1	225486835	225653142	ENAH	enabled homolog (Drosophila) [Source:HGNC Symbol;Acc:HGNC:18271]
ENSG00000154429	932	1034	1207	1203	1185	1438	933	888	1121	778	1117	1135	protein_coding	1	229321005	229343294	CCSAP	centriole, cilia and spindle-associated protein [Source:HGNC Symbol;Acc:HGNC:29578]
ENSG00000154451	2	2	3	9	10	14	1	0	0	1	5	2	protein_coding	1	89258950	89272804	GBP5	guanylate binding protein 5 [Source:HGNC Symbol;Acc:HGNC:19895]
ENSG00000154511	121	111	146	198	185	248	113	105	109	123	163	175	protein_coding	1	92832737	92961522	FAM69A	family with sequence similarity 69, member A [Source:HGNC Symbol;Acc:HGNC:32213]
ENSG00000155363	1162	1275	1526	1554	1552	1769	1019	909	1118	778	1174	1079	protein_coding	1	112673141	112700746	MOV10	Mov10 RISC complex RNA helicase [Source:HGNC Symbol;Acc:HGNC:7200]
ENSG00000155366	1465	1519	1851	2179	2040	2500	1322	1192	1578	1106	1466	1468	protein_coding	1	112701106	112707434	RHOC	ras homolog family member C [Source:HGNC Symbol;Acc:HGNC:669]
ENSG00000155367	17	28	31	23	34	33	24	9	25	23	38	33	protein_coding	1	112709994	112715477	PPM1J	protein phosphatase, Mg2+/Mn2+ dependent, 1J [Source:HGNC Symbol;Acc:HGNC:20785]
ENSG00000155380	3800	3809	4765	3134	2851	3704	3417	3372	4153	2541	3282	3345	protein_coding	1	112911847	112957013	SLC16A1	solute carrier family 16 (monocarboxylate transporter), member 1 [Source:HGNC Symbol;Acc:HGNC:10922]
ENSG00000155761	12	8	12	0	1	2	7	5	6	1	2	2	protein_coding	1	117953861	118185223	SPAG17	sperm associated antigen 17 [Source:HGNC Symbol;Acc:HGNC:26620]
ENSG00000155816	0	0	0	0	0	0	0	0	0	0	0	1	protein_coding	1	240014348	240475189	FMN2	formin 2 [Source:HGNC Symbol;Acc:HGNC:14074]
ENSG00000156097	0	1	1	1	0	0	0	0	0	0	0	1	protein_coding	1	109539872	109548406	GPR61	G protein-coupled receptor 61 [Source:HGNC Symbol;Acc:HGNC:13300]
ENSG00000156171	371	348	479	560	473	565	401	338	395	382	535	552	protein_coding	1	111117333	111140216	DRAM2	DNA-damage regulated autophagy modulator 2 [Source:HGNC Symbol;Acc:HGNC:28769]
ENSG00000156869	200	237	300	233	179	255	221	163	237	138	188	166	protein_coding	1	99708703	99766631	FRRS1	ferric-chelate reductase 1 [Source:HGNC Symbol;Acc:HGNC:27622]
ENSG00000156875	1484	1481	1952	1560	1394	1645	1407	1365	1737	1041	1458	1318	protein_coding	1	100038097	100083377	HIAT1	hippocampus abundant transcript 1 [Source:HGNC Symbol;Acc:HGNC:23363]
ENSG00000156876	812	845	1102	696	570	744	824	757	928	476	653	671	protein_coding	1	100083563	100132955	SASS6	spindle assembly 6 homolog (C. elegans) [Source:HGNC Symbol;Acc:HGNC:25403]
ENSG00000157064	401	392	525	770	729	871	316	268	319	403	581	505	protein_coding	1	183248237	183418602	NMNAT2	nicotinamide nucleotide adenylyltransferase 2 [Source:HGNC Symbol;Acc:HGNC:16789]
ENSG00000157077	946	1008	1165	1200	1125	1432	898	736	969	747	958	932	protein_coding	1	52142094	52346686	ZFYVE9	zinc finger, FYVE domain containing 9 [Source:HGNC Symbol;Acc:HGNC:6775]
ENSG00000157181	626	624	752	720	661	829	512	461	620	436	594	556	protein_coding	1	186375758	186421378	C1orf27	chromosome 1 open reading frame 27 [Source:HGNC Symbol;Acc:HGNC:24299]
ENSG00000157184	1441	1406	1834	1607	1518	1812	1178	1132	1518	959	1273	1236	protein_coding	1	53196429	53214197	CPT2	carnitine palmitoyltransferase 2 [Source:HGNC Symbol;Acc:HGNC:2330]
ENSG00000157191	297	348	394	367	304	369	282	249	334	204	278	247	protein_coding	1	16440672	16460078	NECAP2	NECAP endocytosis associated 2 [Source:HGNC Symbol;Acc:HGNC:25528]
ENSG00000157193	1155	1167	1465	924	834	925	1000	931	1232	600	937	868	protein_coding	1	53245539	53328070	LRP8	low density lipoprotein receptor-related protein 8, apolipoprotein e receptor [Source:HGNC Symbol;Acc:HGNC:6700]
ENSG00000157211	0	0	0	1	4	1	0	2	0	0	1	1	protein_coding	1	54133074	54153770	CDCP2	CUB domain containing protein 2 [Source:HGNC Symbol;Acc:HGNC:27297]
ENSG00000157216	1090	1110	1461	2287	2066	2498	891	902	1096	1180	1765	1707	protein_coding	1	54225432	54413479	SSBP3	single stranded DNA binding protein 3 [Source:HGNC Symbol;Acc:HGNC:15674]
ENSG00000157330	4	1	1	10	9	13	3	3	0	15	12	11	protein_coding	1	12746215	12763699	C1orf158	chromosome 1 open reading frame 158 [Source:HGNC Symbol;Acc:HGNC:28567]
ENSG00000157870	1162	1108	1427	1745	1759	1851	968	946	1159	899	1325	1247	protein_coding	1	2586491	2591469	FAM213B	family with sequence similarity 213, member B [Source:HGNC Symbol;Acc:HGNC:28390]
ENSG00000157873	6	3	13	18	9	12	4	3	10	1	7	9	protein_coding	1	2555639	2565382	TNFRSF14	tumor necrosis factor receptor superfamily, member 14 [Source:HGNC Symbol;Acc:HGNC:11912]
ENSG00000157881	672	660	780	693	683	807	568	516	639	439	651	675	protein_coding	1	2508533	2526600	PANK4	pantothenate kinase 4 [Source:HGNC Symbol;Acc:HGNC:19366]
ENSG00000157911	3048	3371	3987	1045	1035	1184	3248	3090	3852	666	928	849	protein_coding	1	2403964	2413797	PEX10	peroxisomal biogenesis factor 10 [Source:HGNC Symbol;Acc:HGNC:8851]
ENSG00000157916	2988	3049	3612	2935	2888	3352	2404	2158	2887	1663	2175	2182	protein_coding	1	2391775	2405444	RER1	retention in endoplasmic reticulum sorting receptor 1 [Source:HGNC Symbol;Acc:HGNC:30309]
ENSG00000157933	2665	2624	3464	3166	3043	3427	2033	2044	2454	1602	2490	2335	protein_coding	1	2228695	2310119	SKI	SKI proto-oncogene [Source:HGNC Symbol;Acc:HGNC:10896]
ENSG00000157978	578	557	717	608	582	665	495	434	587	313	468	442	protein_coding	1	25543580	25568886	LDLRAP1	low density lipoprotein receptor adaptor protein 1 [Source:HGNC Symbol;Acc:HGNC:18640]
ENSG00000158006	237	221	292	260	235	300	210	190	242	177	252	227	protein_coding	1	25959767	25998157	PAFAH2	platelet-activating factor acetylhydrolase 2, 40kDa [Source:HGNC Symbol;Acc:HGNC:8579]
ENSG00000158008	1	2	3	19	18	21	2	3	2	5	9	9	protein_coding	1	26019884	26036464	EXTL1	exostosin-like glycosyltransferase 1 [Source:HGNC Symbol;Acc:HGNC:3515]
ENSG00000158022	1	1	2	0	0	0	5	2	5	0	0	0	protein_coding	1	26051304	26068436	TRIM63	tripartite motif containing 63, E3 ubiquitin protein ligase [Source:HGNC Symbol;Acc:HGNC:16007]
ENSG00000158055	16	10	19	25	19	31	24	20	18	3	13	15	protein_coding	1	24319322	24364482	GRHL3	grainyhead-like 3 (Drosophila) [Source:HGNC Symbol;Acc:HGNC:25839]
ENSG00000158062	347	355	434	380	404	390	255	227	317	173	284	285	protein_coding	1	26281328	26318363	UBXN11	UBX domain protein 11 [Source:HGNC Symbol;Acc:HGNC:30600]
ENSG00000158109	1018	1088	1243	1026	960	1223	854	769	1017	609	768	748	protein_coding	1	3625002	3630127	TPRG1L	tumor protein p63 regulated 1-like [Source:HGNC Symbol;Acc:HGNC:27007]
ENSG00000158156	204	191	227	216	199	223	130	124	164	108	135	136	protein_coding	1	27959462	27968096	XKR8	XK, Kell blood group complex subunit-related family, member 8 [Source:HGNC Symbol;Acc:HGNC:25508]
ENSG00000158161	1106	1088	1456	1161	1045	1403	780	799	1042	631	797	792	protein_coding	1	27970344	28088696	EYA3	EYA transcriptional coactivator and phosphatase 3 [Source:HGNC Symbol;Acc:HGNC:3521]
ENSG00000158195	3751	3931	4876	3464	3225	3952	3395	3194	3985	2300	3385	3149	protein_coding	1	27404226	27490158	WASF2	WAS protein family, member 2 [Source:HGNC Symbol;Acc:HGNC:12733]
ENSG00000158246	0	1	1	0	0	0	0	1	0	0	1	0	protein_coding	1	27005020	27012836	FAM46B	family with sequence similarity 46, member B [Source:HGNC Symbol;Acc:HGNC:28273]
ENSG00000158286	116	131	173	216	209	210	102	68	95	95	128	129	protein_coding	1	6205475	6221299	RNF207	ring finger protein 207 [Source:HGNC Symbol;Acc:HGNC:32947]
ENSG00000158292	16	10	10	32	24	44	12	6	11	10	17	20	protein_coding	1	6247346	6260975	GPR153	G protein-coupled receptor 153 [Source:HGNC Symbol;Acc:HGNC:23618]
ENSG00000158315	53	58	85	73	65	92	36	34	36	43	40	48	protein_coding	1	38885807	38941799	RHBDL2	rhomboid, veinlet-like 2 (Drosophila) [Source:HGNC Symbol;Acc:HGNC:16083]
ENSG00000158473	0	1	1	0	1	0	1	0	3	0	1	0	protein_coding	1	158179947	158184896	CD1D	CD1d molecule [Source:HGNC Symbol;Acc:HGNC:1637]
ENSG00000158615	4158	4157	5281	2971	2651	3322	3391	3248	4108	1932	2476	2454	protein_coding	1	204403387	204411791	PPP1R15B	protein phosphatase 1, regulatory subunit 15B [Source:HGNC Symbol;Acc:HGNC:14951]
ENSG00000158710	4851	4846	5916	3183	3005	3488	4312	3860	5043	2227	3043	2848	protein_coding	1	159918107	159925732	TAGLN2	transgelin 2 [Source:HGNC Symbol;Acc:HGNC:11554]
ENSG00000158711	5739	6108	7518	2896	2502	3218	5867	5713	7027	2351	3185	3106	protein_coding	1	205597556	205631962	ELK4	ELK4, ETS-domain protein (SRF accessory protein 1) [Source:HGNC Symbol;Acc:HGNC:3326]
ENSG00000158715	8575	9654	11788	594	587	630	10406	9566	12316	528	748	714	protein_coding	1	205657851	205680459	SLC45A3	solute carrier family 45, member 3 [Source:HGNC Symbol;Acc:HGNC:8642]
ENSG00000158716	215	189	272	208	193	213	182	166	231	118	189	185	protein_coding	1	159780932	159782543	DUSP23	dual specificity phosphatase 23 [Source:HGNC Symbol;Acc:HGNC:21480]
ENSG00000158748	0	0	0	3	0	4	0	0	0	2	3	3	protein_coding	1	19665287	19679562	HTR6	5-hydroxytryptamine (serotonin) receptor 6, G protein-coupled [Source:HGNC Symbol;Acc:HGNC:5301]
ENSG00000158764	1	0	0	1	0	1	1	1	0	0	0	1	protein_coding	1	160945025	160954799	ITLN2	intelectin 2 [Source:HGNC Symbol;Acc:HGNC:20599]
ENSG00000158769	1303	1274	1553	1485	1449	1765	1011	919	1208	849	1217	1129	protein_coding	1	160995211	161021348	F11R	F11 receptor [Source:HGNC Symbol;Acc:HGNC:14685]
ENSG00000158773	793	812	1042	984	916	1047	749	666	845	531	708	691	protein_coding	1	161039251	161045977	USF1	upstream transcription factor 1 [Source:HGNC Symbol;Acc:HGNC:12593]
ENSG00000158786	1	1	2	11	21	15	2	0	1	7	14	2	protein_coding	1	20139326	20150386	PLA2G2F	phospholipase A2, group IIF [Source:HGNC Symbol;Acc:HGNC:30040]
ENSG00000158793	366	411	474	555	490	609	345	275	370	282	404	355	protein_coding	1	161118086	161125445	NIT1	nitrilase 1 [Source:HGNC Symbol;Acc:HGNC:7828]
ENSG00000158796	785	853	1021	732	769	800	735	687	806	431	665	557	protein_coding	1	161120974	161132688	DEDD	death effector domain containing [Source:HGNC Symbol;Acc:HGNC:2755]
ENSG00000158816	6	4	7	5	3	4	5	3	1	2	1	3	protein_coding	1	20290919	20354894	VWA5B1	von Willebrand factor A domain containing 5B1 [Source:HGNC Symbol;Acc:HGNC:26538]
ENSG00000158825	0	1	0	0	0	0	0	0	0	0	0	0	protein_coding	1	20588948	20618908	CDA	cytidine deaminase [Source:HGNC Symbol;Acc:HGNC:1712]
ENSG00000158828	362	355	444	810	741	914	269	265	333	388	526	517	protein_coding	1	20633455	20651511	PINK1	PTEN induced putative kinase 1 [Source:HGNC Symbol;Acc:HGNC:14581]
ENSG00000158850	1149	1223	1559	1281	1135	1349	1055	949	1238	757	1051	974	protein_coding	1	161171310	161177968	B4GALT3	UDP-Gal:betaGlcNAc beta 1,4- galactosyltransferase, polypeptide 3 [Source:HGNC Symbol;Acc:HGNC:926]
ENSG00000158859	2	2	3	2	3	1	1	2	2	1	3	2	protein_coding	1	161184308	161199056	ADAMTS4	ADAM metallopeptidase with thrombospondin type 1 motif, 4 [Source:HGNC Symbol;Acc:HGNC:220]
ENSG00000158864	4481	4526	5506	4097	3916	4546	3897	3463	4603	2574	3468	3318	protein_coding	1	161197104	161214395	NDUFS2	NADH dehydrogenase (ubiquinone) Fe-S protein 2, 49kDa (NADH-coenzyme Q reductase) [Source:HGNC Symbol;Acc:HGNC:7708]
ENSG00000158869	5	6	7	3	4	2	0	6	5	0	2	2	protein_coding	1	161215234	161220699	FCER1G	Fc fragment of IgE, high affinity I, receptor for; gamma polypeptide [Source:HGNC Symbol;Acc:HGNC:3611]
ENSG00000158874	0	0	0	0	0	0	1	0	0	0	0	0	protein_coding	1	161222292	161223631	APOA2	apolipoprotein A-II [Source:HGNC Symbol;Acc:HGNC:601]
ENSG00000158882	837	900	1007	702	652	822	727	717	849	423	570	612	protein_coding	1	161225939	161230744	TOMM40L	translocase of outer mitochondrial membrane 40 homolog (yeast)-like [Source:HGNC Symbol;Acc:HGNC:25756]
ENSG00000158887	1	2	3	2	0	0	1	1	0	0	2	2	protein_coding	1	161304735	161309972	MPZ	myelin protein zero [Source:HGNC Symbol;Acc:HGNC:7225]
ENSG00000158966	60	66	105	258	231	327	86	82	109	261	323	344	protein_coding	1	64470792	64693058	CACHD1	cache domain containing 1 [Source:HGNC Symbol;Acc:HGNC:29314]
ENSG00000159023	2993	3062	4063	3486	3022	3922	2697	2505	3149	2275	3164	2908	protein_coding	1	28887091	29120046	EPB41	erythrocyte membrane protein band 4.1 [Source:HGNC Symbol;Acc:HGNC:3377]
ENSG00000159164	2	9	7	3	7	4	9	8	6	0	6	3	protein_coding	1	149903318	149917882	SV2A	synaptic vesicle glycoprotein 2A [Source:HGNC Symbol;Acc:HGNC:20566]
ENSG00000159166	3548	3520	4611	2422	2304	2693	3128	2974	3782	1667	2203	2200	protein_coding	1	201373244	201399608	LAD1	ladinin 1 [Source:HGNC Symbol;Acc:HGNC:6472]
ENSG00000159173	0	0	0	2	1	0	0	0	0	0	0	1	protein_coding	1	201403768	201429866	TNNI1	troponin I type 1 (skeletal, slow) [Source:HGNC Symbol;Acc:HGNC:11945]
ENSG00000159176	2889	2913	3602	3135	3010	3700	2372	2260	2923	1661	2158	2175	protein_coding	1	201483530	201509456	CSRP1	cysteine and glycine-rich protein 1 [Source:HGNC Symbol;Acc:HGNC:2469]
ENSG00000159189	0	0	0	0	0	0	0	0	1	0	0	0	protein_coding	1	22643630	22648110	C1QC	complement component 1, q subcomponent, C chain [Source:HGNC Symbol;Acc:HGNC:1245]
ENSG00000159208	157	131	170	176	154	170	147	135	146	110	153	146	protein_coding	1	150282543	150287093	CIART	circadian associated repressor of transcription [Source:HGNC Symbol;Acc:HGNC:25200]
ENSG00000159214	223	241	305	372	360	430	182	183	199	151	266	229	protein_coding	1	43991359	43996528	CCDC24	coiled-coil domain containing 24 [Source:HGNC Symbol;Acc:HGNC:28688]
ENSG00000159339	0	0	0	0	0	0	0	0	1	0	0	0	protein_coding	1	17308195	17364004	PADI4	peptidyl arginine deiminase, type IV [Source:HGNC Symbol;Acc:HGNC:18368]
ENSG00000159346	2936	3037	3890	3033	2852	3489	2699	2551	3168	1845	2577	2425	protein_coding	1	202940823	202958572	ADIPOR1	adiponectin receptor 1 [Source:HGNC Symbol;Acc:HGNC:24040]
ENSG00000159348	863	902	1069	1000	935	1093	698	654	789	482	703	659	protein_coding	1	202961869	202967280	CYB5R1	cytochrome b5 reductase 1 [Source:HGNC Symbol;Acc:HGNC:13397]
ENSG00000159352	2459	2491	3199	2535	2353	2764	2166	1892	2580	1527	1886	1983	protein_coding	1	151254703	151267479	PSMD4	proteasome (prosome, macropain) 26S subunit, non-ATPase, 4 [Source:HGNC Symbol;Acc:HGNC:9561]
ENSG00000159363	868	872	1119	1268	1168	1321	784	784	902	804	1103	1043	protein_coding	1	16985958	17011928	ATP13A2	ATPase type 13A2 [Source:HGNC Symbol;Acc:HGNC:30213]
ENSG00000159377	4443	4429	5536	4115	4102	5021	3760	3383	4308	2356	3146	2931	protein_coding	1	151399534	151401944	PSMB4	proteasome (prosome, macropain) subunit, beta type, 4 [Source:HGNC Symbol;Acc:HGNC:9541]
ENSG00000159388	477	513	613	681	639	740	479	431	527	412	632	553	protein_coding	1	203305491	203309602	BTG2	BTG family, member 2 [Source:HGNC Symbol;Acc:HGNC:1131]
ENSG00000159409	0	0	1	0	1	0	0	0	0	0	0	1	protein_coding	1	151702404	151716814	CELF3	CUGBP, Elav-like family member 3 [Source:HGNC Symbol;Acc:HGNC:11967]
ENSG00000159423	404	430	545	394	368	458	328	270	442	213	264	269	protein_coding	1	18871430	18902781	ALDH4A1	aldehyde dehydrogenase 4 family, member A1 [Source:HGNC Symbol;Acc:HGNC:406]
ENSG00000159445	1089	1056	1368	910	902	1009	942	885	1054	533	759	709	protein_coding	1	151873584	151909808	THEM4	thioesterase superfamily member 4 [Source:HGNC Symbol;Acc:HGNC:17947]
ENSG00000159450	6	12	5	4	6	9	10	4	12	4	4	5	protein_coding	1	152106317	152115454	TCHH	trichohyalin [Source:HGNC Symbol;Acc:HGNC:11791]
ENSG00000159479	750	823	969	543	554	674	597	533	672	340	427	451	protein_coding	1	43383917	43389808	MED8	mediator complex subunit 8 [Source:HGNC Symbol;Acc:HGNC:19971]
ENSG00000159588	15	20	29	30	30	32	18	22	26	16	15	22	protein_coding	1	45620044	45624057	CCDC17	coiled-coil domain containing 17 [Source:HGNC Symbol;Acc:HGNC:26574]
ENSG00000159592	2108	2063	2601	2391	2217	2656	1971	1733	2255	1638	2363	2143	protein_coding	1	45627304	45688113	GPBP1L1	GC-rich promoter binding protein 1-like 1 [Source:HGNC Symbol;Acc:HGNC:28843]
ENSG00000159596	1148	1269	1582	949	885	1011	1088	1111	1340	706	956	976	protein_coding	1	45687214	45694443	TMEM69	transmembrane protein 69 [Source:HGNC Symbol;Acc:HGNC:28035]
ENSG00000159658	2926	2844	3595	3772	3364	4363	2544	2502	2940	2250	3159	2914	protein_coding	1	46675159	46719064	EFCAB14	EF-hand calcium binding domain 14 [Source:HGNC Symbol;Acc:HGNC:29051]
ENSG00000160049	2146	2217	2779	2135	1832	2204	2036	1801	2334	1244	1748	1664	protein_coding	1	10456522	10472526	DFFA	DNA fragmentation factor, 45kDa, alpha polypeptide [Source:HGNC Symbol;Acc:HGNC:2772]
ENSG00000160050	168	158	211	248	226	299	119	106	140	136	188	179	protein_coding	1	32200386	32205387	CCDC28B	coiled-coil domain containing 28B [Source:HGNC Symbol;Acc:HGNC:28163]
ENSG00000160051	266	261	309	206	230	309	196	206	272	126	193	168	protein_coding	1	32205661	32208687	IQCC	IQ motif containing C [Source:HGNC Symbol;Acc:HGNC:25545]
ENSG00000160055	205	196	255	289	277	298	136	132	176	142	205	225	protein_coding	1	32214472	32222359	TMEM234	transmembrane protein 234 [Source:HGNC Symbol;Acc:HGNC:28837]
ENSG00000160058	1090	1103	1421	1361	1256	1539	895	813	958	652	1012	902	protein_coding	1	32365103	32394731	BSDC1	BSD domain containing 1 [Source:HGNC Symbol;Acc:HGNC:25501]
ENSG00000160062	148	144	199	166	134	195	166	129	178	113	164	144	protein_coding	1	32539427	32605939	ZBTB8A	zinc finger and BTB domain containing 8A [Source:HGNC Symbol;Acc:HGNC:24172]
ENSG00000160072	893	1023	1220	765	806	872	699	612	841	347	583	539	protein_coding	1	1471769	1497848	ATAD3B	ATPase family, AAA domain containing 3B [Source:HGNC Symbol;Acc:HGNC:24007]
ENSG00000160075	3268	3252	3990	2760	2548	3100	2901	2653	3308	1607	2283	2203	protein_coding	1	1541673	1574869	SSU72	SSU72 RNA polymerase II CTD phosphatase homolog (S. cerevisiae) [Source:HGNC Symbol;Acc:HGNC:25016]
ENSG00000160087	1384	1451	1874	1397	1286	1506	1214	1086	1415	825	1107	1065	protein_coding	1	1253909	1273885	UBE2J2	ubiquitin-conjugating enzyme E2, J2 [Source:HGNC Symbol;Acc:HGNC:19268]
ENSG00000160094	520	495	698	881	871	862	419	451	492	440	711	639	protein_coding	1	33256545	33300719	ZNF362	zinc finger protein 362 [Source:HGNC Symbol;Acc:HGNC:18079]
ENSG00000160097	1	0	1	4	0	0	1	0	2	0	0	0	protein_coding	1	32862268	32872482	FNDC5	fibronectin type III domain containing 5 [Source:HGNC Symbol;Acc:HGNC:20240]
ENSG00000160678	0	0	0	0	3	0	1	0	1	0	0	0	protein_coding	1	153627926	153632039	S100A1	S100 calcium binding protein A1 [Source:HGNC Symbol;Acc:HGNC:10486]
ENSG00000160679	2086	2240	2688	2118	2015	2286	1758	1625	2173	1257	1794	1667	protein_coding	1	153633982	153646306	CHTOP	chromatin target of PRMT1 [Source:HGNC Symbol;Acc:HGNC:24511]
ENSG00000160685	2603	2630	3335	4082	3970	4534	2408	2090	2719	2490	3602	3338	protein_coding	1	155002630	155018522	ZBTB7B	zinc finger and BTB domain containing 7B [Source:HGNC Symbol;Acc:HGNC:18668]
ENSG00000160688	1027	1029	1220	927	893	1025	937	741	1109	626	833	787	protein_coding	1	154983338	154993111	FLAD1	flavin adenine dinucleotide synthetase 1 [Source:HGNC Symbol;Acc:HGNC:24671]
ENSG00000160691	1463	1681	1986	1494	1381	1690	1396	1290	1623	964	1277	1279	protein_coding	1	154962298	154974395	SHC1	SHC (Src homology 2 domain containing) transforming protein 1 [Source:HGNC Symbol;Acc:HGNC:10840]
ENSG00000160710	8191	8276	10292	8956	8111	10408	7272	6613	8335	5689	7820	7266	protein_coding	1	154582062	154627999	ADAR	adenosine deaminase, RNA-specific [Source:HGNC Symbol;Acc:HGNC:225]
ENSG00000160712	1259	1318	1664	641	561	740	1179	1100	1432	430	543	581	protein_coding	1	154405193	154469450	IL6R	interleukin 6 receptor [Source:HGNC Symbol;Acc:HGNC:6019]
ENSG00000160714	1773	1728	2290	1894	1807	2020	1432	1403	1792	1168	1654	1525	protein_coding	1	154548577	154559028	UBE2Q1	ubiquitin-conjugating enzyme E2Q family member 1 [Source:HGNC Symbol;Acc:HGNC:15698]
ENSG00000160716	0	1	0	1	0	1	1	1	0	0	0	1	protein_coding	1	154567781	154580026	CHRNB2	cholinergic receptor, nicotinic, beta 2 (neuronal) [Source:HGNC Symbol;Acc:HGNC:1962]
ENSG00000160741	468	411	598	610	583	602	406	324	504	393	492	472	protein_coding	1	153947669	153958625	CRTC2	CREB regulated transcription coactivator 2 [Source:HGNC Symbol;Acc:HGNC:27301]
ENSG00000160752	2693	2761	3363	2061	2067	2436	2615	2269	2872	1334	1963	1826	protein_coding	1	155308748	155320666	FDPS	farnesyl diphosphate synthase [Source:HGNC Symbol;Acc:HGNC:3631]
ENSG00000160753	1135	1246	1485	1233	1133	1438	1033	920	1195	621	815	800	protein_coding	1	155320896	155331114	RUSC1	RUN and SH3 domain containing 1 [Source:HGNC Symbol;Acc:HGNC:17153]
ENSG00000160766	75	79	111	100	105	106	72	82	94	49	73	88	transcribed_unprocessed_pseudogene	1	155213821	155227422	GBAP1	glucosidase, beta, acid pseudogene 1 [Source:HGNC Symbol;Acc:HGNC:4178]
ENSG00000160767	1502	1638	2083	1775	1635	1921	1460	1420	1685	1135	1674	1556	protein_coding	1	155247205	155255483	FAM189B	family with sequence similarity 189, member B [Source:HGNC Symbol;Acc:HGNC:1233]
ENSG00000160781	165	163	223	171	170	145	131	120	165	60	138	136	protein_coding	1	156243321	156248117	PAQR6	progestin and adipoQ receptor family member VI [Source:HGNC Symbol;Acc:HGNC:30132]
ENSG00000160783	314	368	439	295	323	345	284	233	342	178	230	216	protein_coding	1	156212993	156240042	PMF1	polyamine-modulated factor 1 [Source:HGNC Symbol;Acc:HGNC:9112]
ENSG00000160785	1239	1409	1667	1306	1193	1467	1062	1015	1268	673	991	937	protein_coding	1	156193932	156212796	SLC25A44	solute carrier family 25, member 44 [Source:HGNC Symbol;Acc:HGNC:29036]
ENSG00000160789	1216	1246	1580	1464	1385	1596	943	880	1170	686	1030	1012	protein_coding	1	156082573	156140089	LMNA	lamin A/C [Source:HGNC Symbol;Acc:HGNC:6636]
ENSG00000160803	2319	2318	2971	2031	1871	2265	1977	1737	2434	1179	1636	1537	protein_coding	1	156035301	156053794	UBQLN4	ubiquilin 4 [Source:HGNC Symbol;Acc:HGNC:1237]
ENSG00000160818	1444	1446	1857	984	965	1191	1235	1061	1528	533	756	711	protein_coding	1	156594487	156601496	GPATCH4	G patch domain containing 4 [Source:HGNC Symbol;Acc:HGNC:25982]
ENSG00000160856	1	0	0	0	0	1	0	0	0	0	0	0	protein_coding	1	157674321	157700857	FCRL3	Fc receptor-like 3 [Source:HGNC Symbol;Acc:HGNC:18506]
ENSG00000162365	0	1	1	2	0	0	0	0	0	0	1	1	protein_coding	1	47137435	47149741	CYP4A22	cytochrome P450, family 4, subfamily A, polypeptide 22 [Source:HGNC Symbol;Acc:HGNC:20575]
ENSG00000162366	5	14	13	12	8	14	7	8	11	6	9	8	protein_coding	1	47183593	47191044	PDZK1IP1	PDZK1 interacting protein 1 [Source:HGNC Symbol;Acc:HGNC:16887]
ENSG00000162368	3900	4086	4989	4105	3734	4836	3664	3227	4366	2469	3352	3311	protein_coding	1	47333797	47378839	CMPK1	cytidine monophosphate (UMP-CMP) kinase 1, cytosolic [Source:HGNC Symbol;Acc:HGNC:18170]
ENSG00000162373	0	0	1	1	1	3	0	1	0	2	2	3	protein_coding	1	48727523	48776969	BEND5	BEN domain containing 5 [Source:HGNC Symbol;Acc:HGNC:25668]
ENSG00000162377	1600	1628	2011	1190	1133	1403	1346	1231	1685	716	964	929	protein_coding	1	52684451	52698366	COA7	cytochrome c oxidase assembly factor 7 (putative) [Source:HGNC Symbol;Acc:HGNC:25716]
ENSG00000162378	1223	1258	1479	1467	1302	1832	1080	965	1200	969	1298	1253	protein_coding	1	52726467	52827342	ZYG11B	zyg-11 family member B, cell cycle regulator [Source:HGNC Symbol;Acc:HGNC:25820]
ENSG00000162383	0	0	0	0	0	0	0	0	0	1	0	1	protein_coding	1	53087179	53142632	SLC1A7	solute carrier family 1 (glutamate transporter), member 7 [Source:HGNC Symbol;Acc:HGNC:10945]
ENSG00000162384	516	522	650	563	530	630	407	391	522	329	498	479	protein_coding	1	53214099	53220617	C1orf123	chromosome 1 open reading frame 123 [Source:HGNC Symbol;Acc:HGNC:26059]
ENSG00000162385	503	522	667	400	381	459	463	457	646	246	366	327	protein_coding	1	53226892	53238610	MAGOH	mago-nashi homolog, proliferation-associated (Drosophila) [Source:HGNC Symbol;Acc:HGNC:6815]
ENSG00000162390	165	188	183	172	167	229	133	128	133	84	130	135	protein_coding	1	54542257	54639192	ACOT11	acyl-CoA thioesterase 11 [Source:HGNC Symbol;Acc:HGNC:18156]
ENSG00000162391	4	2	2	0	0	0	1	3	1	0	0	1	protein_coding	1	54609182	54623556	FAM151A	family with sequence similarity 151, member A [Source:HGNC Symbol;Acc:HGNC:25032]
ENSG00000162396	243	258	339	264	312	340	224	225	276	231	248	243	protein_coding	1	54756898	54764514	PARS2	prolyl-tRNA synthetase 2, mitochondrial (putative) [Source:HGNC Symbol;Acc:HGNC:30563]
ENSG00000162402	2020	2152	2654	2067	1881	2462	1795	1605	2120	1414	1955	1795	protein_coding	1	55066359	55215113	USP24	ubiquitin specific peptidase 24 [Source:HGNC Symbol;Acc:HGNC:12623]
ENSG00000162407	210	244	287	156	124	157	186	163	221	140	189	184	protein_coding	1	56494747	56645301	PPAP2B	phosphatidic acid phosphatase type 2B [Source:HGNC Symbol;Acc:HGNC:9229]
ENSG00000162408	1961	1992	2377	1675	1391	1739	1394	1431	1807	884	1243	1214	protein_coding	1	6521347	6554535	NOL9	nucleolar protein 9 [Source:HGNC Symbol;Acc:HGNC:26265]
ENSG00000162409	303	319	393	313	301	351	426	336	430	224	330	284	protein_coding	1	56645322	56715335	PRKAA2	protein kinase, AMP-activated, alpha 2 catalytic subunit [Source:HGNC Symbol;Acc:HGNC:9377]
ENSG00000162413	1323	1408	1826	1470	1455	1605	1075	958	1245	745	1031	1020	protein_coding	1	6590724	6614607	KLHL21	kelch-like family member 21 [Source:HGNC Symbol;Acc:HGNC:29041]
ENSG00000162415	25	26	45	127	98	125	18	25	29	61	120	120	protein_coding	1	45016399	45306209	ZSWIM5	zinc finger, SWIM-type containing 5 [Source:HGNC Symbol;Acc:HGNC:29299]
ENSG00000162419	802	783	990	680	616	770	621	597	748	391	570	524	protein_coding	1	28668732	28719353	GMEB1	glucocorticoid modulatory element binding protein 1 [Source:HGNC Symbol;Acc:HGNC:4370]
ENSG00000162426	27	13	31	45	53	57	17	12	25	14	29	40	protein_coding	1	8317826	8344167	SLC45A1	solute carrier family 45, member 1 [Source:HGNC Symbol;Acc:HGNC:17939]
ENSG00000162430	1853	1928	2600	2284	2146	2583	1706	1696	2047	1441	2052	1915	protein_coding	1	25800176	25818224	SEPN1	selenoprotein N, 1 [Source:HGNC Symbol;Acc:HGNC:15999]
ENSG00000162433	6077	6304	7610	4865	4437	5677	5636	5398	6660	3506	4659	4695	protein_coding	1	65147549	65232145	AK4	adenylate kinase 4 [Source:HGNC Symbol;Acc:HGNC:363]
ENSG00000162434	106	120	173	183	203	197	103	92	145	95	168	165	protein_coding	1	64833229	64966504	JAK1	Janus kinase 1 [Source:HGNC Symbol;Acc:HGNC:6190]
ENSG00000162437	509	519	642	820	762	887	500	393	531	512	668	635	protein_coding	1	64745095	64833232	RAVER2	ribonucleoprotein, PTB-binding 2 [Source:HGNC Symbol;Acc:HGNC:25577]
ENSG00000162438	4	5	6	6	4	5	3	1	4	3	3	1	protein_coding	1	15438439	15449242	CTRC	chymotrypsin C (caldecrin) [Source:HGNC Symbol;Acc:HGNC:2523]
ENSG00000162441	1001	987	1188	1028	868	1193	847	777	978	637	781	768	protein_coding	1	9922113	9943407	LZIC	leucine zipper and CTNNBIP1 domain containing [Source:HGNC Symbol;Acc:HGNC:17497]
ENSG00000162444	1	1	0	2	1	0	0	0	0	0	0	0	protein_coding	1	9997206	10016020	RBP7	retinol binding protein 7, cellular [Source:HGNC Symbol;Acc:HGNC:30316]
ENSG00000162458	20	23	27	31	29	34	9	10	18	11	21	22	protein_coding	1	15756607	15786594	FBLIM1	filamin binding LIM protein 1 [Source:HGNC Symbol;Acc:HGNC:24686]
ENSG00000162461	7	5	13	10	8	11	6	5	6	2	6	7	protein_coding	1	15736405	15741396	SLC25A34	solute carrier family 25, member 34 [Source:HGNC Symbol;Acc:HGNC:27653]
ENSG00000162482	10	14	9	19	6	14	7	15	9	9	9	14	protein_coding	1	19282558	19289250	AKR7A3	aldo-keto reductase family 7, member A3 (aflatoxin aldehyde reductase) [Source:HGNC Symbol;Acc:HGNC:390]
ENSG00000162490	1	2	3	1	2	0	2	2	2	1	2	2	protein_coding	1	11691729	11725857	DRAXIN	dorsal inhibitory axon guidance protein [Source:HGNC Symbol;Acc:HGNC:25054]
ENSG00000162493	0	0	0	1	0	0	0	0	0	1	0	0	protein_coding	1	13583465	13617957	PDPN	podoplanin [Source:HGNC Symbol;Acc:HGNC:29602]
ENSG00000162496	107	125	135	122	102	157	141	128	134	124	198	219	protein_coding	1	12567910	12617731	DHRS3	dehydrogenase/reductase (SDR family) member 3 [Source:HGNC Symbol;Acc:HGNC:17693]
ENSG00000162510	2	1	1	1	2	0	2	3	2	0	3	0	protein_coding	1	30711277	30723587	MATN1	matrilin 1, cartilage matrix protein [Source:HGNC Symbol;Acc:HGNC:6907]
ENSG00000162511	0	3	1	1	1	0	1	1	1	0	0	2	protein_coding	1	30732469	30757820	LAPTM5	lysosomal protein transmembrane 5 [Source:HGNC Symbol;Acc:HGNC:29612]
ENSG00000162512	1104	1109	1390	1731	1581	2010	926	941	1138	1044	1531	1411	protein_coding	1	30869467	30908761	SDC3	syndecan 3 [Source:HGNC Symbol;Acc:HGNC:10660]
ENSG00000162517	1326	1267	1732	1243	1167	1426	1089	953	1286	717	984	989	protein_coding	1	31629862	31644896	PEF1	penta-EF-hand domain containing 1 [Source:HGNC Symbol;Acc:HGNC:30009]
ENSG00000162520	6	10	9	3	1	3	4	5	8	0	1	1	protein_coding	1	32680360	32703596	SYNC	syncoilin, intermediate filament protein [Source:HGNC Symbol;Acc:HGNC:28897]
ENSG00000162521	7991	7952	9515	7074	6459	8058	6980	6322	8131	4617	6344	5880	protein_coding	1	32651142	32686211	RBBP4	retinoblastoma binding protein 4 [Source:HGNC Symbol;Acc:HGNC:9887]
ENSG00000162522	3987	4134	5194	6552	6099	7098	3506	3358	4004	3711	5112	4737	protein_coding	1	32741885	32774970	KIAA1522	KIAA1522 [Source:HGNC Symbol;Acc:HGNC:29301]
ENSG00000162526	29	22	32	28	34	24	29	11	24	17	13	20	protein_coding	1	32351521	32364312	TSSK3	testis-specific serine kinase 3 [Source:HGNC Symbol;Acc:HGNC:15473]
ENSG00000162542	645	598	815	709	674	802	525	514	653	400	498	488	protein_coding	1	19682213	19799945	TMCO4	transmembrane and coiled-coil domains 4 [Source:HGNC Symbol;Acc:HGNC:27393]
ENSG00000162543	0	0	0	1	0	0	0	0	0	0	2	0	protein_coding	1	20186085	20196048	UBXN10	UBX domain protein 10 [Source:HGNC Symbol;Acc:HGNC:26354]
ENSG00000162545	31	29	35	3417	3129	3669	32	34	30	1247	1673	1604	protein_coding	1	20482391	20486220	CAMK2N1	calcium/calmodulin-dependent protein kinase II inhibitor 1 [Source:HGNC Symbol;Acc:HGNC:24190]
ENSG00000162551	0	0	1	0	1	0	0	0	0	1	1	2	protein_coding	1	21509372	21578412	ALPL	alkaline phosphatase, liver/bone/kidney [Source:HGNC Symbol;Acc:HGNC:438]
ENSG00000162552	18	21	17	51	50	69	27	18	22	35	51	45	protein_coding	1	22117305	22143969	WNT4	wingless-type MMTV integration site family, member 4 [Source:HGNC Symbol;Acc:HGNC:12783]
ENSG00000162571	5	3	2	10	11	5	0	0	0	5	7	3	protein_coding	1	1173884	1197935	TTLL10	tubulin tyrosine ligase-like family, member 10 [Source:HGNC Symbol;Acc:HGNC:26693]
ENSG00000162572	121	136	177	343	325	311	88	95	108	107	201	213	protein_coding	1	1280436	1292029	SCNN1D	sodium channel, non-voltage-gated 1, delta subunit [Source:HGNC Symbol;Acc:HGNC:10601]
ENSG00000162576	407	434	484	657	701	664	325	256	340	367	519	546	protein_coding	1	1352689	1361777	MXRA8	matrix-remodelling associated 8 [Source:HGNC Symbol;Acc:HGNC:7542]
ENSG00000162585	719	698	974	1103	1123	1222	628	526	737	565	773	816	protein_coding	1	2184461	2212720	C1orf86	chromosome 1 open reading frame 86 [Source:HGNC Symbol;Acc:HGNC:26428]
ENSG00000162591	30	39	42	103	84	83	21	27	39	40	53	41	protein_coding	1	3489920	3611495	MEGF6	multiple EGF-like-domains 6 [Source:HGNC Symbol;Acc:HGNC:3232]
ENSG00000162595	1	0	0	5	0	2	0	0	0	2	0	1	protein_coding	1	68045962	68051631	DIRAS3	DIRAS family, GTP-binding RAS-like 3 [Source:HGNC Symbol;Acc:HGNC:687]
ENSG00000162598	1	0	0	0	0	1	0	0	1	0	0	0	protein_coding	1	59987269	60073770	C1orf87	chromosome 1 open reading frame 87 [Source:HGNC Symbol;Acc:HGNC:28547]
ENSG00000162599	2117	2264	2880	2884	2587	3224	2021	1874	2418	2053	2756	2722	protein_coding	1	60865259	61462793	NFIA	nuclear factor I/A [Source:HGNC Symbol;Acc:HGNC:7784]
ENSG00000162600	832	820	1052	747	615	763	667	684	817	375	574	516	protein_coding	1	58415384	58546802	OMA1	OMA1 zinc metallopeptidase [Source:HGNC Symbol;Acc:HGNC:29661]
ENSG00000162601	1621	1671	2119	2222	2073	2425	1296	1215	1486	1280	1970	1913	protein_coding	1	58654739	58700092	MYSM1	Myb-like, SWIRM and MPN domains 1 [Source:HGNC Symbol;Acc:HGNC:29401]
ENSG00000162604	379	354	477	405	433	498	325	292	380	264	395	369	protein_coding	1	61681046	61725423	TM2D1	TM2 domain containing 1 [Source:HGNC Symbol;Acc:HGNC:24142]
ENSG00000162607	2419	2563	3055	2048	2004	2593	2268	2005	2555	1317	1693	1697	protein_coding	1	62436297	62451804	USP1	ubiquitin specific peptidase 1 [Source:HGNC Symbol;Acc:HGNC:12607]
ENSG00000162613	3442	3454	4522	3526	3196	3860	2737	2585	3326	2247	3103	3115	protein_coding	1	77944055	77979110	FUBP1	far upstream element (FUSE) binding protein 1 [Source:HGNC Symbol;Acc:HGNC:4004]
ENSG00000162614	1	0	1	0	2	6	2	0	0	0	0	2	protein_coding	1	77888513	77943895	NEXN	nexilin (F actin binding protein) [Source:HGNC Symbol;Acc:HGNC:29557]
ENSG00000162616	263	239	315	334	286	351	235	218	301	203	254	266	protein_coding	1	77979175	78017964	DNAJB4	DnaJ (Hsp40) homolog, subfamily B, member 4 [Source:HGNC Symbol;Acc:HGNC:14886]
ENSG00000162618	2	0	0	0	0	0	1	1	3	0	0	0	protein_coding	1	78889764	79006718	ELTD1	EGF, latrophilin and seven transmembrane domain containing 1 [Source:HGNC Symbol;Acc:HGNC:20822]
ENSG00000162620	16	14	16	12	7	13	16	8	17	7	9	6	protein_coding	1	74026015	74198187	LRRIQ3	leucine-rich repeats and IQ motif containing 3 [Source:HGNC Symbol;Acc:HGNC:28318]
ENSG00000162623	1484	1561	1886	1367	1249	1584	1401	1207	1624	940	1173	1108	protein_coding	1	74733152	74766678	TYW3	tRNA-yW synthesizing protein 3 homolog (S. cerevisiae) [Source:HGNC Symbol;Acc:HGNC:24757]
ENSG00000162627	400	410	491	412	417	488	519	465	564	354	474	401	protein_coding	1	98661701	98760500	SNX7	sorting nexin 7 [Source:HGNC Symbol;Acc:HGNC:14971]
ENSG00000162630	0	0	0	1	0	0	0	0	0	0	0	0	protein_coding	1	193179045	193186654	B3GALT2	UDP-Gal:betaGlcNAc beta 1,3-galactosyltransferase, polypeptide 2 [Source:HGNC Symbol;Acc:HGNC:917]
ENSG00000162631	5	8	4	2	1	1	4	1	6	5	4	5	protein_coding	1	107140007	107483458	NTNG1	netrin G1 [Source:HGNC Symbol;Acc:HGNC:23319]
ENSG00000162636	313	309	351	507	490	576	294	265	339	373	475	477	protein_coding	1	108560089	108644900	FAM102B	family with sequence similarity 102, member B [Source:HGNC Symbol;Acc:HGNC:27637]
ENSG00000162639	1	1	0	1	0	0	0	0	0	0	0	0	protein_coding	1	108648290	108661526	HENMT1	HEN1 methyltransferase homolog 1 (Arabidopsis) [Source:HGNC Symbol;Acc:HGNC:26400]
ENSG00000162641	0	1	0	0	0	0	0	1	0	0	1	0	protein_coding	1	108815898	108858228	AKNAD1	AKNA domain containing 1 [Source:HGNC Symbol;Acc:HGNC:28398]
ENSG00000162642	427	433	552	479	405	483	374	333	461	265	378	357	protein_coding	1	85249953	85259672	C1orf52	chromosome 1 open reading frame 52 [Source:HGNC Symbol;Acc:HGNC:24871]
ENSG00000162643	0	0	0	1	0	1	0	1	0	1	2	0	protein_coding	1	84999147	85133138	WDR63	WD repeat domain 63 [Source:HGNC Symbol;Acc:HGNC:30711]
ENSG00000162645	17	17	27	14	6	14	8	6	10	2	4	2	protein_coding	1	89106132	89150456	GBP2	guanylate binding protein 2, interferon-inducible [Source:HGNC Symbol;Acc:HGNC:4183]
ENSG00000162650	229	237	313	283	246	283	178	192	242	177	220	182	protein_coding	1	109483479	109492804	ATXN7L2	ataxin 7-like 2 [Source:HGNC Symbol;Acc:HGNC:28713]
ENSG00000162654	0	1	2	4	3	6	1	0	0	0	2	6	protein_coding	1	89181148	89198932	GBP4	guanylate binding protein 4 [Source:HGNC Symbol;Acc:HGNC:20480]
ENSG00000162664	1049	1104	1389	1370	1310	1511	887	805	1071	696	991	1001	protein_coding	1	89995112	90035531	ZNF326	zinc finger protein 326 [Source:HGNC Symbol;Acc:HGNC:14104]
ENSG00000162669	13	23	22	26	28	30	12	8	7	12	18	22	protein_coding	1	91260766	91404869	HFM1	HFM1, ATP-dependent DNA helicase homolog (S. cerevisiae) [Source:HGNC Symbol;Acc:HGNC:20193]
ENSG00000162670	1	1	0	0	0	1	1	0	1	0	1	1	protein_coding	1	190097662	190477629	BRINP3	bone morphogenetic protein/retinoic acid inducible neural-specific 3 [Source:HGNC Symbol;Acc:HGNC:22393]
ENSG00000162676	1	2	6	13	4	13	2	2	3	4	9	3	protein_coding	1	92474762	92486876	GFI1	growth factor independent 1 transcription repressor [Source:HGNC Symbol;Acc:HGNC:4237]
ENSG00000162688	651	645	830	902	710	976	660	557	682	592	816	789	protein_coding	1	99850084	99924023	AGL	amylo-alpha-1, 6-glucosidase, 4-alpha-glucanotransferase [Source:HGNC Symbol;Acc:HGNC:321]
ENSG00000162692	0	1	1	0	0	0	0	0	0	0	0	0	protein_coding	1	100719742	100739045	VCAM1	vascular cell adhesion molecule 1 [Source:HGNC Symbol;Acc:HGNC:12663]
ENSG00000162694	753	774	978	448	432	534	803	687	892	320	525	455	protein_coding	1	100872372	100895998	EXTL2	exostosin-like glycosyltransferase 2 [Source:HGNC Symbol;Acc:HGNC:3516]
ENSG00000162695	1070	1143	1290	775	717	931	1012	926	1164	586	767	734	protein_coding	1	100896076	100981753	SLC30A7	solute carrier family 30 (zinc transporter), member 7 [Source:HGNC Symbol;Acc:HGNC:19306]
ENSG00000162702	611	586	743	794	673	903	548	512	633	480	680	701	protein_coding	1	200404940	200410056	ZNF281	zinc finger protein 281 [Source:HGNC Symbol;Acc:HGNC:13075]
ENSG00000162704	2653	2663	3318	2625	2397	3208	2552	2234	2784	1768	2320	2188	protein_coding	1	183620846	183635757	ARPC5	actin related protein 2/3 complex, subunit 5, 16kDa [Source:HGNC Symbol;Acc:HGNC:708]
ENSG00000162706	0	0	0	0	0	0	0	0	1	0	0	0	protein_coding	1	159171609	159203313	CADM3	cell adhesion molecule 3 [Source:HGNC Symbol;Acc:HGNC:17601]
ENSG00000162711	0	2	1	0	0	0	1	2	0	0	0	0	protein_coding	1	247416156	247449108	NLRP3	NLR family, pyrin domain containing 3 [Source:HGNC Symbol;Acc:HGNC:16400]
ENSG00000162714	442	527	601	547	557	621	433	420	513	395	592	599	protein_coding	1	247297412	247331846	ZNF496	zinc finger protein 496 [Source:HGNC Symbol;Acc:HGNC:23713]
ENSG00000162722	0	0	0	1	0	2	0	0	2	0	4	2	protein_coding	1	247857199	247878205	TRIM58	tripartite motif containing 58 [Source:HGNC Symbol;Acc:HGNC:24150]
ENSG00000162723	3	0	1	2	10	6	2	2	1	2	1	3	protein_coding	1	159951492	159954254	SLAMF9	SLAM family member 9 [Source:HGNC Symbol;Acc:HGNC:18430]
ENSG00000162728	17	12	11	12	3	13	9	11	12	6	10	6	protein_coding	1	160081570	160090563	KCNJ9	potassium inwardly-rectifying channel, subfamily J, member 9 [Source:HGNC Symbol;Acc:HGNC:6270]
ENSG00000162729	675	768	955	1016	864	1087	632	575	714	512	716	661	protein_coding	1	160091340	160098943	IGSF8	immunoglobulin superfamily, member 8 [Source:HGNC Symbol;Acc:HGNC:17813]
ENSG00000162733	204	205	249	185	127	185	129	128	174	68	95	101	protein_coding	1	162631373	162787400	DDR2	discoidin domain receptor tyrosine kinase 2 [Source:HGNC Symbol;Acc:HGNC:2731]
ENSG00000162734	3262	3408	4368	2762	2547	3189	2453	2429	3192	1489	1940	1850	protein_coding	1	160205337	160215376	PEA15	phosphoprotein enriched in astrocytes 15 [Source:HGNC Symbol;Acc:HGNC:8822]
ENSG00000162735	1675	1750	2172	2167	1964	2441	1495	1407	1766	1266	1766	1643	protein_coding	1	160276812	160286348	PEX19	peroxisomal biogenesis factor 19 [Source:HGNC Symbol;Acc:HGNC:9713]
ENSG00000162736	1894	1983	2528	2097	1920	2191	1690	1597	1963	1309	1835	1689	protein_coding	1	160343272	160358952	NCSTN	nicastrin [Source:HGNC Symbol;Acc:HGNC:17091]
ENSG00000162738	4	4	8	24	14	30	11	13	8	24	31	33	protein_coding	1	160400586	160428678	VANGL2	VANGL planar cell polarity protein 2 [Source:HGNC Symbol;Acc:HGNC:15511]
ENSG00000162739	0	0	0	1	0	0	0	0	0	0	0	0	protein_coding	1	160485030	160523262	SLAMF6	SLAM family member 6 [Source:HGNC Symbol;Acc:HGNC:21392]
ENSG00000162745	0	0	1	2	1	1	3	2	1	3	7	3	protein_coding	1	161983192	162023854	OLFML2B	olfactomedin-like 2B [Source:HGNC Symbol;Acc:HGNC:24558]
ENSG00000162746	26	28	31	25	21	14	22	32	30	5	16	17	protein_coding	1	161721563	161728143	FCRLB	Fc receptor-like B [Source:HGNC Symbol;Acc:HGNC:26431]
ENSG00000162753	0	0	0	0	0	0	1	0	0	0	0	0	protein_coding	1	173500464	173603094	SLC9C2	solute carrier family 9, member C2 (putative) [Source:HGNC Symbol;Acc:HGNC:28664]
ENSG00000162755	201	195	196	334	353	383	161	126	167	201	347	274	protein_coding	1	161098361	161100346	KLHDC9	kelch domain containing 9 [Source:HGNC Symbol;Acc:HGNC:28489]
ENSG00000162757	321	375	416	352	324	390	352	295	396	277	356	353	protein_coding	1	209779208	209784559	C1orf74	chromosome 1 open reading frame 74 [Source:HGNC Symbol;Acc:HGNC:26319]
ENSG00000162761	1	1	0	0	1	1	0	1	0	0	0	0	protein_coding	1	165201867	165356715	LMX1A	LIM homeobox transcription factor 1, alpha [Source:HGNC Symbol;Acc:HGNC:6653]
ENSG00000162769	1154	1158	1508	1141	1000	1291	983	895	1135	711	952	897	protein_coding	1	212858255	212899363	FLVCR1	feline leukemia virus subgroup C cellular receptor 1 [Source:HGNC Symbol;Acc:HGNC:24682]
ENSG00000162772	463	477	609	435	381	413	419	360	492	338	438	441	protein_coding	1	212565334	212620777	ATF3	activating transcription factor 3 [Source:HGNC Symbol;Acc:HGNC:785]
ENSG00000162775	503	537	643	449	400	467	399	422	456	324	372	421	protein_coding	1	110338506	110346681	RBM15	RNA binding motif protein 15 [Source:HGNC Symbol;Acc:HGNC:14959]
ENSG00000162779	17	30	26	11	15	7	17	21	23	5	7	12	protein_coding	1	179365720	179554735	AXDND1	axonemal dynein light chain domain containing 1 [Source:HGNC Symbol;Acc:HGNC:26564]
ENSG00000162782	3	3	0	0	1	2	2	2	2	0	0	0	protein_coding	1	179591613	179691272	TDRD5	tudor domain containing 5 [Source:HGNC Symbol;Acc:HGNC:20614]
ENSG00000162783	178	184	220	265	199	269	129	137	169	161	232	227	protein_coding	1	181088712	181092899	IER5	immediate early response 5 [Source:HGNC Symbol;Acc:HGNC:5393]
ENSG00000162813	1217	1186	1429	1022	951	1198	1070	984	1285	642	816	772	protein_coding	1	220057482	220090462	BPNT1	3'(2'), 5'-bisphosphate nucleotidase 1 [Source:HGNC Symbol;Acc:HGNC:1096]
ENSG00000162814	29	24	32	40	40	39	23	17	23	30	35	42	protein_coding	1	217631324	217871696	SPATA17	spermatogenesis associated 17 [Source:HGNC Symbol;Acc:HGNC:25184]
ENSG00000162817	949	1008	1171	1251	1115	1421	850	754	1013	751	1080	1028	protein_coding	1	220689845	220699157	C1orf115	chromosome 1 open reading frame 115 [Source:HGNC Symbol;Acc:HGNC:25873]
ENSG00000162819	2051	1932	2317	3157	2999	3977	1472	1319	1711	1574	2040	1993	protein_coding	1	222712553	222735196	BROX	BRO1 domain and CAAX motif containing [Source:HGNC Symbol;Acc:HGNC:26512]
ENSG00000162825	38	31	63	90	100	115	36	28	52	43	77	67	protein_coding	1	145289900	145405778	NBPF8	neuroblastoma breakpoint family, member 8 [Source:HGNC Symbol;Acc:HGNC:31990]
ENSG00000162836	604	632	768	611	593	665	524	512	606	391	585	588	protein_coding	1	147629652	147670496	ACP6	acid phosphatase 6, lysophosphatidic [Source:HGNC Symbol;Acc:HGNC:29609]
ENSG00000162843	0	1	0	0	0	0	0	0	0	0	0	0	protein_coding	1	241652278	241802133	WDR64	WD repeat domain 64 [Source:HGNC Symbol;Acc:HGNC:26570]
ENSG00000162849	4	2	0	1	0	3	4	3	3	0	1	2	protein_coding	1	245154985	245709431	KIF26B	kinesin family member 26B [Source:HGNC Symbol;Acc:HGNC:25484]
ENSG00000162851	739	799	981	601	575	649	701	640	825	370	438	502	protein_coding	1	246540560	246566324	TFB2M	transcription factor B2, mitochondrial [Source:HGNC Symbol;Acc:HGNC:18559]
ENSG00000162852	839	845	1118	1106	975	1307	719	696	888	686	931	895	protein_coding	1	246566444	246668584	CNST	consortin, connexin sorting protein [Source:HGNC Symbol;Acc:HGNC:26486]
ENSG00000162873	1	1	3	0	1	0	0	0	4	6	2	4	protein_coding	1	205336065	205357090	KLHDC8A	kelch domain containing 8A [Source:HGNC Symbol;Acc:HGNC:25573]
ENSG00000162877	1	0	1	2	1	1	1	0	0	2	0	1	protein_coding	1	205828022	205850132	PM20D1	peptidase M20 domain containing 1 [Source:HGNC Symbol;Acc:HGNC:26518]
ENSG00000162885	640	605	716	524	461	554	552	475	605	333	498	486	protein_coding	1	235449923	235504481	B3GALNT2	beta-1,3-N-acetylgalactosaminyltransferase 2 [Source:HGNC Symbol;Acc:HGNC:28596]
ENSG00000162889	966	1023	1307	1578	1668	1959	951	873	1099	1123	1575	1417	protein_coding	1	206684944	206734283	MAPKAPK2	mitogen-activated protein kinase-activated protein kinase 2 [Source:HGNC Symbol;Acc:HGNC:6887]
ENSG00000162894	14	19	21	35	23	38	10	8	23	5	22	17	protein_coding	1	206904386	206923247	FAIM3	Fas apoptotic inhibitory molecule 3 [Source:HGNC Symbol;Acc:HGNC:14315]
ENSG00000162896	1	0	0	2	2	0	1	4	2	0	0	5	protein_coding	1	206928518	206946466	PIGR	polymeric immunoglobulin receptor [Source:HGNC Symbol;Acc:HGNC:8968]
ENSG00000162909	775	820	956	886	927	1061	765	707	819	490	620	646	protein_coding	1	223701593	223776018	CAPN2	calpain 2, (m/II) large subunit [Source:HGNC Symbol;Acc:HGNC:1479]
ENSG00000162910	641	674	846	599	588	759	628	527	718	389	589	534	protein_coding	1	228106679	228109312	MRPL55	mitochondrial ribosomal protein L55 [Source:HGNC Symbol;Acc:HGNC:16686]
ENSG00000162913	27	21	33	55	63	68	21	21	24	22	28	29	protein_coding	1	228203506	228213664	C1orf145	chromosome 1 open reading frame 145 [Source:HGNC Symbol;Acc:HGNC:32047]
ENSG00000162923	2495	2602	3257	3674	3461	4269	2273	2088	2554	1989	2575	2691	protein_coding	1	224385143	224437033	WDR26	WD repeat domain 26 [Source:HGNC Symbol;Acc:HGNC:21208]
ENSG00000162946	1	7	7	6	14	13	8	10	4	19	35	27	protein_coding	1	231626815	232041272	DISC1	disrupted in schizophrenia 1 [Source:HGNC Symbol;Acc:HGNC:2888]
ENSG00000163041	5983	5978	7548	7644	7281	8685	5282	4957	6165	4749	6620	6402	protein_coding	1	226061851	226072001	H3F3A	H3 histone, family 3A [Source:HGNC Symbol;Acc:HGNC:4764]
ENSG00000163050	1777	1838	2258	1240	1160	1361	1616	1429	1918	848	1198	1182	protein_coding	1	226897536	226987545	ADCK3	aarF domain containing kinase 3 [Source:HGNC Symbol;Acc:HGNC:16812]
ENSG00000163125	1887	1865	2459	2274	2131	2690	1484	1535	1946	1515	2005	1900	protein_coding	1	150363091	150476566	RPRD2	regulation of nuclear pre-mRNA domain containing 2 [Source:HGNC Symbol;Acc:HGNC:29039]
ENSG00000163131	0	2	2	4	2	5	2	0	0	0	1	2	protein_coding	1	150730196	150765957	CTSS	cathepsin S [Source:HGNC Symbol;Acc:HGNC:2545]
ENSG00000163141	10	7	10	13	16	15	8	5	7	8	10	8	protein_coding	1	151036570	151047600	BNIPL	BCL2/adenovirus E1B 19kD interacting protein like [Source:HGNC Symbol;Acc:HGNC:16976]
ENSG00000163155	243	261	341	297	285	327	267	209	274	202	271	246	protein_coding	1	151159748	151165948	LYSMD1	LysM, putative peptidoglycan-binding, domain containing 1 [Source:HGNC Symbol;Acc:HGNC:32070]
ENSG00000163156	381	405	548	330	314	404	364	329	440	197	311	288	protein_coding	1	151156664	151170297	SCNM1	sodium channel modifier 1 [Source:HGNC Symbol;Acc:HGNC:23136]
ENSG00000163159	971	1102	1335	1047	1013	1160	926	859	1096	673	984	910	protein_coding	1	151169987	151195321	VPS72	vacuolar protein sorting 72 homolog (S. cerevisiae) [Source:HGNC Symbol;Acc:HGNC:11644]
ENSG00000163191	2765	2792	3519	1076	988	1189	2165	2349	2810	677	1030	927	protein_coding	1	152032506	152047907	S100A11	S100 calcium binding protein A11 [Source:HGNC Symbol;Acc:HGNC:10488]
ENSG00000163207	3	1	1	1	0	0	1	4	0	0	0	0	protein_coding	1	152908545	152911886	IVL	involucrin [Source:HGNC Symbol;Acc:HGNC:6187]
ENSG00000163216	1	0	0	0	0	0	0	0	0	0	0	0	protein_coding	1	153039725	153041931	SPRR2D	small proline-rich protein 2D [Source:HGNC Symbol;Acc:HGNC:11264]
ENSG00000163220	2	0	0	1	0	0	1	2	0	1	1	0	protein_coding	1	153357854	153361027	S100A9	S100 calcium binding protein A9 [Source:HGNC Symbol;Acc:HGNC:10499]
ENSG00000163263	0	1	1	0	1	1	0	0	0	0	0	0	protein_coding	1	154199372	154206333	C1orf189	chromosome 1 open reading frame 189 [Source:HGNC Symbol;Acc:HGNC:32305]
ENSG00000163344	1119	1024	1287	1008	998	1133	899	825	1062	565	760	740	protein_coding	1	154924734	154936991	PMVK	phosphomevalonate kinase [Source:HGNC Symbol;Acc:HGNC:9141]
ENSG00000163346	202	248	274	464	429	555	211	160	210	292	391	373	protein_coding	1	154944076	154956123	PBXIP1	pre-B-cell leukemia homeobox interacting protein 1 [Source:HGNC Symbol;Acc:HGNC:21199]
ENSG00000163348	1491	1438	1842	1858	1664	1961	1120	1072	1384	1030	1461	1338	protein_coding	1	154957026	154963853	PYGO2	pygopus family PHD finger 2 [Source:HGNC Symbol;Acc:HGNC:30257]
ENSG00000163349	2966	3071	3976	3124	2725	3483	2379	2354	2887	1959	2663	2396	protein_coding	1	113929192	113977804	HIPK1	homeodomain interacting protein kinase 1 [Source:HGNC Symbol;Acc:HGNC:19006]
ENSG00000163352	1	0	0	0	0	0	2	0	0	0	0	1	protein_coding	1	154993586	154994315	LENEP	lens epithelial protein [Source:HGNC Symbol;Acc:HGNC:14429]
ENSG00000163354	95	97	113	174	166	155	66	64	72	87	161	120	protein_coding	1	155018520	155033781	DCST2	DC-STAMP domain containing 2 [Source:HGNC Symbol;Acc:HGNC:26562]
ENSG00000163357	2	0	2	4	2	1	2	2	0	2	3	2	protein_coding	1	155033824	155050930	DCST1	DC-STAMP domain containing 1 [Source:HGNC Symbol;Acc:HGNC:26539]
ENSG00000163362	23	39	59	12	14	14	35	31	43	7	7	12	protein_coding	1	200891048	200915735	C1orf106	chromosome 1 open reading frame 106 [Source:HGNC Symbol;Acc:HGNC:25599]
ENSG00000163374	867	854	1065	941	875	1076	763	691	908	584	787	728	protein_coding	1	155659443	155689000	YY1AP1	YY1 associated protein 1 [Source:HGNC Symbol;Acc:HGNC:30935]
ENSG00000163382	2516	2600	3270	2708	2625	3283	2301	2161	2757	1612	2270	2143	protein_coding	1	156591762	156594299	APOA1BP	apolipoprotein A-I binding protein [Source:HGNC Symbol;Acc:HGNC:18453]
ENSG00000163393	56	40	67	165	126	154	46	38	49	65	107	108	protein_coding	1	115976498	116070054	SLC22A15	solute carrier family 22, member 15 [Source:HGNC Symbol;Acc:HGNC:20301]
ENSG00000163395	0	0	0	2	2	3	1	0	0	1	1	3	protein_coding	1	201190825	201228952	IGFN1	immunoglobulin-like and fibronectin type III domain containing 1 [Source:HGNC Symbol;Acc:HGNC:24607]
ENSG00000163399	13067	13716	16533	11546	10958	13577	12262	11168	14018	7685	10447	9624	protein_coding	1	116372668	116410261	ATP1A1	ATPase, Na+/K+ transporting, alpha 1 polypeptide [Source:HGNC Symbol;Acc:HGNC:799]
ENSG00000163431	2	1	0	0	1	0	0	1	0	0	1	1	protein_coding	1	201896452	201946588	LMOD1	leiomodin 1 (smooth muscle) [Source:HGNC Symbol;Acc:HGNC:6647]
ENSG00000163435	200	224	252	496	407	498	164	141	191	233	316	313	protein_coding	1	202007945	202017188	ELF3	E74-like factor 3 (ets domain transcription factor, epithelial-specific ) [Source:HGNC Symbol;Acc:HGNC:3318]
ENSG00000163444	2188	2160	2706	2172	2057	2686	1969	1768	2308	1362	1795	1800	protein_coding	1	203007386	203024848	TMEM183A	transmembrane protein 183A [Source:HGNC Symbol;Acc:HGNC:20173]
ENSG00000163462	62	81	95	63	76	72	50	41	62	38	54	47	protein_coding	1	155173787	155184971	TRIM46	tripartite motif containing 46 [Source:HGNC Symbol;Acc:HGNC:19019]
ENSG00000163463	130	132	179	117	131	136	110	91	106	49	95	89	protein_coding	1	155169408	155173475	KRTCAP2	keratinocyte associated protein 2 [Source:HGNC Symbol;Acc:HGNC:28942]
ENSG00000163467	24	28	43	38	26	30	18	25	25	7	12	21	protein_coding	1	156337314	156346995	TSACC	TSSK6 activating co-chaperone [Source:HGNC Symbol;Acc:HGNC:30636]
ENSG00000163468	10747	10856	13545	9783	9005	10972	9674	8652	11231	6021	8278	7740	protein_coding	1	156308968	156367873	CCT3	chaperonin containing TCP1, subunit 3 (gamma) [Source:HGNC Symbol;Acc:HGNC:1616]
ENSG00000163472	582	683	884	298	272	331	457	449	607	149	182	191	protein_coding	1	156282935	156293185	TMEM79	transmembrane protein 79 [Source:HGNC Symbol;Acc:HGNC:28196]
ENSG00000163479	4109	4205	5392	3262	2967	3645	3562	3319	4271	2156	2963	2852	protein_coding	1	156009048	156020959	SSR2	signal sequence receptor, beta (translocon-associated protein beta) [Source:HGNC Symbol;Acc:HGNC:11324]
ENSG00000163485	33	40	47	88	70	100	34	27	38	57	71	59	protein_coding	1	203090654	203167405	ADORA1	adenosine A1 receptor [Source:HGNC Symbol;Acc:HGNC:262]
ENSG00000163531	18	29	30	91	89	94	27	23	24	46	85	66	protein_coding	1	204828651	205022822	NFASC	neurofascin [Source:HGNC Symbol;Acc:HGNC:29866]
ENSG00000163545	278	243	319	258	300	321	224	206	261	185	317	276	protein_coding	1	205302059	205321755	NUAK2	NUAK family, SNF1-like kinase, 2 [Source:HGNC Symbol;Acc:HGNC:29558]
ENSG00000163564	0	1	0	1	0	0	0	0	0	0	0	1	protein_coding	1	158930796	158977054	PYHIN1	pyrin and HIN domain family, member 1 [Source:HGNC Symbol;Acc:HGNC:28894]
ENSG00000163565	0	0	1	0	0	1	0	0	0	0	0	0	protein_coding	1	158999968	159055155	IFI16	interferon, gamma-inducible protein 16 [Source:HGNC Symbol;Acc:HGNC:5395]
ENSG00000163866	767	811	1050	782	702	895	699	632	841	429	604	589	protein_coding	1	34712737	34859816	SMIM12	small integral membrane protein 12 [Source:HGNC Symbol;Acc:HGNC:25154]
ENSG00000163867	299	322	363	423	375	466	266	245	302	185	285	290	protein_coding	1	34986165	35031968	ZMYM6	zinc finger, MYM-type 6 [Source:HGNC Symbol;Acc:HGNC:13050]
ENSG00000163873	0	1	1	1	0	0	0	0	0	0	0	0	protein_coding	1	36795527	37034129	GRIK3	glutamate receptor, ionotropic, kainate 3 [Source:HGNC Symbol;Acc:HGNC:4581]
ENSG00000163874	318	335	390	563	590	587	254	220	265	264	409	438	protein_coding	1	37474552	37484379	ZC3H12A	zinc finger CCCH-type containing 12A [Source:HGNC Symbol;Acc:HGNC:26259]
ENSG00000163875	2120	2130	2642	2026	1756	2207	1931	1935	2374	1175	1633	1571	protein_coding	1	37492575	37514774	MEAF6	MYST/Esa1-associated factor 6 [Source:HGNC Symbol;Acc:HGNC:25674]
ENSG00000163877	516	572	646	592	602	692	485	476	625	356	457	460	protein_coding	1	37534449	37554302	SNIP1	Smad nuclear interacting protein 1 [Source:HGNC Symbol;Acc:HGNC:30587]
ENSG00000163879	2	2	2	2	3	7	4	2	4	5	2	6	protein_coding	1	37556919	37566857	DNALI1	dynein, axonemal, light intermediate chain 1 [Source:HGNC Symbol;Acc:HGNC:14353]
ENSG00000164002	274	278	364	246	207	260	205	197	262	93	164	141	protein_coding	1	40508741	40516556	EXO5	exonuclease 5 [Source:HGNC Symbol;Acc:HGNC:26115]
ENSG00000164007	0	0	0	0	0	0	0	1	0	0	0	0	protein_coding	1	42733093	42740254	CLDN19	claudin 19 [Source:HGNC Symbol;Acc:HGNC:2040]
ENSG00000164008	162	164	180	141	140	156	116	112	145	74	106	106	protein_coding	1	42767269	42794493	C1orf50	chromosome 1 open reading frame 50 [Source:HGNC Symbol;Acc:HGNC:28795]
ENSG00000164010	204	174	216	317	282	348	119	132	180	132	189	175	protein_coding	1	42817124	42844989	ERMAP	erythroblast membrane-associated protein (Scianna blood group) [Source:HGNC Symbol;Acc:HGNC:15743]
ENSG00000164011	279	234	329	308	316	334	205	170	224	158	271	208	protein_coding	1	42846573	42852477	ZNF691	zinc finger protein 691 [Source:HGNC Symbol;Acc:HGNC:28028]
ENSG00000168118	1166	1225	1462	974	917	1175	1026	905	1244	573	722	761	protein_coding	1	229271062	229305894	RAB4A	RAB4A, member RAS oncogene family [Source:HGNC Symbol;Acc:HGNC:9781]
ENSG00000168159	9321	9149	11580	9128	8341	10267	7829	7247	9168	6549	8915	8309	protein_coding	1	228487061	228495766	RNF187	ring finger protein 187 [Source:HGNC Symbol;Acc:HGNC:27146]
ENSG00000168243	137	136	189	515	473	577	179	148	182	384	486	511	protein_coding	1	235547687	235650754	GNG4	guanine nucleotide binding protein (G protein), gamma 4 [Source:HGNC Symbol;Acc:HGNC:4407]
ENSG00000168264	987	976	1161	1223	1223	1285	1009	897	1196	1071	1396	1402	protein_coding	1	234604269	234609525	IRF2BP2	interferon regulatory factor 2 binding protein 2 [Source:HGNC Symbol;Acc:HGNC:21729]
ENSG00000168275	404	432	486	344	337	396	352	327	423	262	333	282	protein_coding	1	234373456	234384049	COA6	cytochrome c oxidase assembly factor 6 homolog (S. cerevisiae) [Source:HGNC Symbol;Acc:HGNC:18025]
ENSG00000168389	162	222	218	149	139	156	155	164	198	93	106	123	protein_coding	1	39955112	39969968	MFSD2A	major facilitator superfamily domain containing 2A [Source:HGNC Symbol;Acc:HGNC:25897]
ENSG00000168509	0	0	1	0	0	0	0	0	0	0	0	0	protein_coding	1	146017468	146021918	HFE2	hemochromatosis type 2 (juvenile) [Source:HGNC Symbol;Acc:HGNC:4887]
ENSG00000168528	1187	1185	1570	1116	1103	1216	1083	1009	1276	639	921	888	protein_coding	1	31409565	31434680	SERINC2	serine incorporator 2 [Source:HGNC Symbol;Acc:HGNC:23231]
ENSG00000168653	3081	3224	3927	3168	2892	3358	3039	2662	3607	2083	2848	2676	protein_coding	1	39026318	39034636	NDUFS5	NADH dehydrogenase (ubiquinone) Fe-S protein 5, 15kDa (NADH-coenzyme Q reductase) [Source:HGNC Symbol;Acc:HGNC:7712]
ENSG00000168679	3	1	5	5	1	3	0	2	0	1	2	2	protein_coding	1	110362848	110391082	SLC16A4	solute carrier family 16, member 4 [Source:HGNC Symbol;Acc:HGNC:10925]
ENSG00000168710	3161	3312	4068	3594	3382	4212	3024	2740	3597	2624	3621	3302	protein_coding	1	109984686	110023741	AHCYL1	adenosylhomocysteinase-like 1 [Source:HGNC Symbol;Acc:HGNC:344]
ENSG00000168765	1	3	3	0	0	2	0	0	1	0	0	1	protein_coding	1	109656081	109674836	GSTM4	glutathione S-transferase mu 4 [Source:HGNC Symbol;Acc:HGNC:4636]
ENSG00000169174	0	2	0	0	0	0	0	0	0	0	0	0	protein_coding	1	55039548	55064852	PCSK9	proprotein convertase subtilisin/kexin type 9 [Source:HGNC Symbol;Acc:HGNC:20001]
ENSG00000169213	2909	2909	3725	903	875	1062	2711	2530	3013	604	815	715	protein_coding	1	51907956	51990764	RAB3B	RAB3B, member RAS oncogene family [Source:HGNC Symbol;Acc:HGNC:9778]
ENSG00000169218	0	1	0	0	0	0	0	0	0	0	0	0	protein_coding	1	37611350	37634923	RSPO1	R-spondin 1 [Source:HGNC Symbol;Acc:HGNC:21679]
ENSG00000169224	0	1	0	0	0	0	0	2	1	0	0	0	protein_coding	1	247507058	247577690	GCSAML	germinal center-associated, signaling and motility-like [Source:HGNC Symbol;Acc:HGNC:29583]
ENSG00000169231	357	404	493	430	420	437	363	274	358	230	391	330	protein_coding	1	155195588	155209051	THBS3	thrombospondin 3 [Source:HGNC Symbol;Acc:HGNC:11787]
ENSG00000169241	1425	1414	1734	1792	1565	2070	1250	1098	1459	1039	1423	1299	protein_coding	1	155135344	155138857	SLC50A1	solute carrier family 50 (sugar efflux transporter), member 1 [Source:HGNC Symbol;Acc:HGNC:30657]
ENSG00000169242	664	714	911	1105	988	1174	539	518	690	514	756	770	protein_coding	1	155127460	155134857	EFNA1	ephrin-A1 [Source:HGNC Symbol;Acc:HGNC:3221]
ENSG00000169291	0	1	0	1	0	1	0	0	0	0	0	1	protein_coding	1	154469772	154502113	SHE	Src homology 2 domain containing E [Source:HGNC Symbol;Acc:HGNC:27004]
ENSG00000169403	4	7	1	8	4	3	8	3	2	1	5	2	protein_coding	1	28147166	28193936	PTAFR	platelet-activating factor receptor [Source:HGNC Symbol;Acc:HGNC:9582]
ENSG00000169418	2	2	2	5	4	9	9	7	9	4	13	4	protein_coding	1	153678637	153693992	NPR1	natriuretic peptide receptor 1 [Source:HGNC Symbol;Acc:HGNC:7943]
ENSG00000169504	2926	2953	3875	2584	2213	2875	2428	2227	3040	1968	2614	2514	protein_coding	1	24745357	24844324	CLIC4	chloride intracellular channel 4 [Source:HGNC Symbol;Acc:HGNC:13518]
ENSG00000169598	486	541	716	390	337	398	459	448	535	239	376	282	protein_coding	1	3857267	3885429	DFFB	DNA fragmentation factor, 40kDa, beta polypeptide (caspase-activated DNase) [Source:HGNC Symbol;Acc:HGNC:2773]
ENSG00000169641	535	519	611	620	527	737	460	460	597	370	478	504	protein_coding	1	23084023	23177808	LUZP1	leucine zipper protein 1 [Source:HGNC Symbol;Acc:HGNC:14985]
ENSG00000169885	25	16	19	23	37	31	16	18	16	10	20	13	protein_coding	1	1914827	1917296	CALML6	calmodulin-like 6 [Source:HGNC Symbol;Acc:HGNC:24193]
ENSG00000169905	2636	2742	3468	2637	2279	2861	2181	2048	2560	1591	2084	2003	protein_coding	1	179839967	179877803	TOR1AIP2	torsin A interacting protein 2 [Source:HGNC Symbol;Acc:HGNC:24055]
ENSG00000169914	377	447	563	523	454	528	353	358	457	351	433	395	protein_coding	1	19882513	19912945	OTUD3	OTU deubiquitinase 3 [Source:HGNC Symbol;Acc:HGNC:29038]
ENSG00000169962	7	4	7	3	3	5	4	6	4	1	1	2	protein_coding	1	1331314	1335306	TAS1R3	taste receptor, type 1, member 3 [Source:HGNC Symbol;Acc:HGNC:15661]
ENSG00000169972	500	458	614	417	429	476	393	371	465	221	334	284	protein_coding	1	1308567	1311677	PUSL1	pseudouridylate synthase-like 1 [Source:HGNC Symbol;Acc:HGNC:26914]
ENSG00000169991	201	248	289	217	228	287	201	183	219	161	226	188	protein_coding	1	18904281	18956686	IFFO2	intermediate filament family orphan 2 [Source:HGNC Symbol;Acc:HGNC:27006]
ENSG00000170075	0	1	0	1	4	4	0	0	1	0	2	1	protein_coding	1	202122858	202133592	GPR37L1	G protein-coupled receptor 37 like 1 [Source:HGNC Symbol;Acc:HGNC:14923]
ENSG00000170382	0	0	0	3	6	3	0	0	0	0	1	3	protein_coding	1	204617170	204685733	LRRN2	leucine rich repeat neuronal 2 [Source:HGNC Symbol;Acc:HGNC:16914]
ENSG00000170385	440	424	526	543	537	679	381	338	459	277	406	385	protein_coding	1	211571568	211578742	SLC30A1	solute carrier family 30 (zinc transporter), member 1 [Source:HGNC Symbol;Acc:HGNC:11012]
ENSG00000170498	3	1	2	4	5	3	1	1	0	3	3	3	protein_coding	1	204190341	204196486	KISS1	KiSS-1 metastasis-suppressor [Source:HGNC Symbol;Acc:HGNC:6341]
ENSG00000171161	999	903	1220	1130	1042	1154	865	747	975	635	974	923	protein_coding	1	248838210	248849517	ZNF672	zinc finger protein 672 [Source:HGNC Symbol;Acc:HGNC:26179]
ENSG00000171163	858	791	1124	913	984	869	728	570	808	428	751	718	protein_coding	1	248850006	248859144	ZNF692	zinc finger protein 692 [Source:HGNC Symbol;Acc:HGNC:26049]
ENSG00000171357	1	2	0	1	0	0	0	0	0	0	0	1	protein_coding	1	46203334	46221261	LURAP1	leucine rich adaptor protein 1 [Source:HGNC Symbol;Acc:HGNC:32327]
ENSG00000171385	195	176	222	145	157	189	187	140	197	110	159	147	protein_coding	1	111770662	111989155	KCND3	potassium voltage-gated channel, Shal-related subfamily, member 3 [Source:HGNC Symbol;Acc:HGNC:6239]
ENSG00000171488	97	94	95	105	130	150	66	73	89	75	87	99	protein_coding	1	89633072	89769903	LRRC8C	leucine rich repeat containing 8 family, member C [Source:HGNC Symbol;Acc:HGNC:25075]
ENSG00000171492	2825	2951	3720	2453	2262	2925	2507	2353	3107	1834	2602	2445	protein_coding	1	89821014	89936611	LRRC8D	leucine rich repeat containing 8 family, member D [Source:HGNC Symbol;Acc:HGNC:16992]
ENSG00000171502	1	2	5	5	6	5	5	0	1	1	4	5	protein_coding	1	85729233	86156943	COL24A1	collagen, type XXIV, alpha 1 [Source:HGNC Symbol;Acc:HGNC:20821]
ENSG00000171517	1763	1872	2411	470	383	522	1807	1648	2109	384	493	462	protein_coding	1	84811602	84893213	LPAR3	lysophosphatidic acid receptor 3 [Source:HGNC Symbol;Acc:HGNC:14298]
ENSG00000171603	5444	5654	7030	8458	7868	9045	4839	4733	5692	4834	7105	6940	protein_coding	1	9729026	9824526	CLSTN1	calsyntenin 1 [Source:HGNC Symbol;Acc:HGNC:17447]
ENSG00000171608	1382	1482	1815	2750	2406	2853	1169	1088	1383	1192	1645	1562	protein_coding	1	9651732	9729114	PIK3CD	phosphatidylinositol-4,5-bisphosphate 3-kinase, catalytic subunit delta [Source:HGNC Symbol;Acc:HGNC:8977]
ENSG00000171612	1614	1604	1952	858	780	1019	1427	1161	1607	600	782	644	protein_coding	1	9539482	9585179	SLC25A33	solute carrier family 25 (pyrimidine nucleotide carrier), member 33 [Source:HGNC Symbol;Acc:HGNC:29681]
ENSG00000171621	64	66	108	84	73	98	49	61	78	59	92	62	protein_coding	1	9292880	9369532	SPSB1	splA/ryanodine receptor domain and SOCS box containing 1 [Source:HGNC Symbol;Acc:HGNC:30628]
ENSG00000171680	115	141	183	235	221	271	108	99	129	86	166	162	protein_coding	1	6466092	6520061	PLEKHG5	pleckstrin homology domain containing, family G (with RhoGef domain) member 5 [Source:HGNC Symbol;Acc:HGNC:29105]
ENSG00000171729	51	49	53	97	109	145	50	44	49	56	84	87	protein_coding	1	15152532	15220480	TMEM51	transmembrane protein 51 [Source:HGNC Symbol;Acc:HGNC:25488]
ENSG00000171735	572	625	771	592	601	678	566	498	609	422	556	567	protein_coding	1	6785324	7769706	CAMTA1	calmodulin binding transcription activator 1 [Source:HGNC Symbol;Acc:HGNC:18806]
ENSG00000171786	11	10	6	8	6	11	3	5	11	1	9	5	protein_coding	1	160367067	160372848	NHLH1	nescient helix loop helix 1 [Source:HGNC Symbol;Acc:HGNC:7817]
ENSG00000171790	13	16	17	26	16	24	20	19	20	10	21	14	protein_coding	1	41015597	41023237	SLFNL1	schlafen-like 1 [Source:HGNC Symbol;Acc:HGNC:26313]
ENSG00000171793	2253	2339	2854	1567	1462	1863	1976	1766	2224	1053	1433	1307	protein_coding	1	40979335	41012565	CTPS1	CTP synthase 1 [Source:HGNC Symbol;Acc:HGNC:2519]
ENSG00000171806	227	224	254	247	197	266	225	178	246	123	189	192	protein_coding	1	169792529	169794966	METTL18	methyltransferase like 18 [Source:HGNC Symbol;Acc:HGNC:28793]
ENSG00000171812	4	0	1	20	15	20	1	2	2	4	4	8	protein_coding	1	36095236	36125220	COL8A2	collagen, type VIII, alpha 2 [Source:HGNC Symbol;Acc:HGNC:2216]
ENSG00000171824	1988	1993	2545	1990	1754	2150	1716	1630	2111	1211	1632	1578	protein_coding	1	11066618	11099881	EXOSC10	exosome component 10 [Source:HGNC Symbol;Acc:HGNC:9138]
ENSG00000171872	0	0	0	0	0	0	0	0	0	0	0	1	protein_coding	1	44118850	44135140	KLF17	Kruppel-like factor 17 [Source:HGNC Symbol;Acc:HGNC:18830]
ENSG00000171943	115	128	192	191	174	216	111	110	138	133	194	165	protein_coding	1	121184810	121392822	SRGAP2C	SLIT-ROBO Rho GTPase activating protein 2C [Source:HGNC Symbol;Acc:HGNC:30584]
ENSG00000171960	791	767	1071	634	603	744	699	690	884	438	615	593	protein_coding	1	42658425	42676758	PPIH	peptidylprolyl isomerase H (cyclophilin H) [Source:HGNC Symbol;Acc:HGNC:14651]
ENSG00000172031	139	151	174	266	238	326	141	126	159	132	154	167	protein_coding	1	92029982	92063536	EPHX4	epoxide hydrolase 4 [Source:HGNC Symbol;Acc:HGNC:23758]
ENSG00000172260	1	0	1	1	1	0	0	1	4	0	0	0	protein_coding	1	71395940	72282734	NEGR1	neuronal growth regulator 1 [Source:HGNC Symbol;Acc:HGNC:17302]
ENSG00000172339	380	385	463	336	279	386	337	279	372	183	228	247	protein_coding	1	94974407	95072945	ALG14	ALG14, UDP-N-acetylglucosaminyltransferase subunit [Source:HGNC Symbol;Acc:HGNC:28287]
ENSG00000172380	2067	2144	2587	2025	1674	2302	2025	1739	2202	1353	1693	1675	protein_coding	1	67701466	67833467	GNG12	guanine nucleotide binding protein (G protein), gamma 12 [Source:HGNC Symbol;Acc:HGNC:19663]
ENSG00000172410	7	3	5	17	18	26	2	4	8	10	9	6	protein_coding	1	66797741	66801256	INSL5	insulin-like 5 [Source:HGNC Symbol;Acc:HGNC:6088]
ENSG00000172456	175	178	220	198	205	272	138	155	145	112	148	168	protein_coding	1	59296638	59767675	FGGY	FGGY carbohydrate kinase domain containing [Source:HGNC Symbol;Acc:HGNC:25610]
ENSG00000172746	0	0	0	3	0	2	2	0	2	3	2	0	unprocessed_pseudogene	1	26980165	26980975	RP11-344H11.4
ENSG00000173080	0	0	1	1	0	0	0	0	1	0	0	1	protein_coding	1	155941710	155942949	RXFP4	relaxin/insulin-like family peptide receptor 4 [Source:HGNC Symbol;Acc:HGNC:14666]
ENSG00000173110	6	7	11	2	5	5	8	2	8	3	1	3	protein_coding	1	161524540	161526910	HSPA6	heat shock 70kDa protein 6 (HSP70B') [Source:HGNC Symbol;Acc:HGNC:5239]
ENSG00000173171	534	583	718	435	453	491	497	450	567	281	452	347	protein_coding	1	155208699	155213824	MTX1	metaxin 1 [Source:HGNC Symbol;Acc:HGNC:7504]
ENSG00000173207	1496	1396	1883	1134	1121	1289	1359	1185	1484	830	1175	1090	protein_coding	1	154974653	154979249	CKS1B	CDC28 protein kinase regulatory subunit 1B [Source:HGNC Symbol;Acc:HGNC:19083]
ENSG00000173212	24	33	30	18	21	21	20	28	32	10	16	24	protein_coding	1	116111755	116135240	MAB21L3	mab-21-like 3 (C. elegans) [Source:HGNC Symbol;Acc:HGNC:26787]
ENSG00000173218	1381	1407	1746	1614	1442	1837	1190	1071	1430	1030	1336	1321	protein_coding	1	115641953	115698224	VANGL1	VANGL planar cell polarity protein 1 [Source:HGNC Symbol;Acc:HGNC:15512]
ENSG00000173406	0	0	0	30	41	34	0	0	0	13	17	16	protein_coding	1	56994778	58546734	DAB1	Dab, reelin signal transducer, homolog 1 (Drosophila) [Source:HGNC Symbol;Acc:HGNC:2661]
ENSG00000173409	519	527	581	625	599	718	471	354	503	412	538	494	protein_coding	1	230978981	231000595	ARV1	ARV1 homolog (S. cerevisiae) [Source:HGNC Symbol;Acc:HGNC:29561]
ENSG00000173436	107	125	110	104	118	169	89	75	110	86	115	76	protein_coding	1	19596977	19629821	MINOS1	mitochondrial inner membrane organizing system 1 [Source:HGNC Symbol;Acc:HGNC:32068]
ENSG00000173614	213	193	268	243	203	251	191	150	210	140	192	163	protein_coding	1	9943428	9985501	NMNAT1	nicotinamide nucleotide adenylyltransferase 1 [Source:HGNC Symbol;Acc:HGNC:17877]
ENSG00000173660	5190	5416	6661	5039	4849	5855	4737	4435	5562	3467	4604	4283	protein_coding	1	46303631	46316776	UQCRH	ubiquinol-cytochrome c reductase hinge protein [Source:HGNC Symbol;Acc:HGNC:12590]
ENSG00000173662	3	3	7	5	3	9	5	0	2	2	4	4	protein_coding	1	6555181	6579757	TAS1R1	taste receptor, type 1, member 1 [Source:HGNC Symbol;Acc:HGNC:14448]
ENSG00000173726	7174	7371	8964	6494	6121	7962	6698	5747	7583	4552	6246	5870	protein_coding	1	235109336	235128936	TOMM20	translocase of outer mitochondrial membrane 20 homolog (yeast) [Source:HGNC Symbol;Acc:HGNC:20947]
ENSG00000173810	0	0	0	0	1	0	0	0	0	0	0	0	processed_pseudogene	1	101270875	101271363	PPIAP7	peptidylprolyl isomerase A (cyclophilin A) pseudogene 7 [Source:HGNC Symbol;Acc:HGNC:9270]
ENSG00000173846	105	127	168	145	147	153	119	88	152	92	107	102	protein_coding	1	44800225	44805990	PLK3	polo-like kinase 3 [Source:HGNC Symbol;Acc:HGNC:2154]
ENSG00000173947	1	1	0	13	11	9	1	3	4	2	6	9	protein_coding	1	111346288	111353013	PIFO	primary cilia formation [Source:HGNC Symbol;Acc:HGNC:27009]
ENSG00000174021	3093	3015	4115	3966	3737	4428	2905	2767	3525	2732	3782	3626	protein_coding	1	84498325	84506565	GNG5	guanine nucleotide binding protein (G protein), gamma 5 [Source:HGNC Symbol;Acc:HGNC:4408]
ENSG00000174059	1	2	2	4	3	5	0	0	1	1	1	1	protein_coding	1	207880972	207911402	CD34	CD34 molecule [Source:HGNC Symbol;Acc:HGNC:1662]
ENSG00000174151	481	493	542	589	526	710	386	336	474	377	481	446	protein_coding	1	109494052	109502932	CYB561D1	cytochrome b561 family, member D1 [Source:HGNC Symbol;Acc:HGNC:26804]
ENSG00000174307	483	491	608	641	596	774	364	324	406	289	409	395	protein_coding	1	201464383	201469237	PHLDA3	pleckstrin homology-like domain, family A, member 3 [Source:HGNC Symbol;Acc:HGNC:8934]
ENSG00000174332	3	1	5	9	7	8	5	2	3	2	9	9	protein_coding	1	53506237	53734204	GLIS1	GLIS family zinc finger 1 [Source:HGNC Symbol;Acc:HGNC:29525]
ENSG00000174348	0	0	0	0	1	0	0	0	0	0	0	0	protein_coding	1	53062052	53085502	PODN	podocan [Source:HGNC Symbol;Acc:HGNC:23174]
ENSG00000174371	899	871	1141	666	604	866	777	710	941	447	571	598	protein_coding	1	241847967	241895148	EXO1	exonuclease 1 [Source:HGNC Symbol;Acc:HGNC:3511]
ENSG00000174502	0	0	0	1	0	0	0	0	0	0	0	0	protein_coding	1	205913048	205943460	SLC26A9	solute carrier family 26 (anion exchanger), member 9 [Source:HGNC Symbol;Acc:HGNC:14469]
ENSG00000174514	44	59	50	114	117	142	50	33	53	72	99	94	protein_coding	1	205568885	205602918	MFSD4	major facilitator superfamily domain containing 4 [Source:HGNC Symbol;Acc:HGNC:25433]
ENSG00000174529	55	43	54	57	52	56	52	29	60	40	50	34	protein_coding	1	205083129	205084460	TMEM81	transmembrane protein 81 [Source:HGNC Symbol;Acc:HGNC:32349]
ENSG00000174567	63	77	109	103	93	113	96	58	72	64	89	82	protein_coding	1	204198160	204214092	GOLT1A	golgi transport 1A [Source:HGNC Symbol;Acc:HGNC:24766]
ENSG00000174574	2235	2324	2849	2435	2304	2799	1818	1641	2229	1421	1923	1875	protein_coding	1	38991223	39006059	AKIRIN1	akirin 1 [Source:HGNC Symbol;Acc:HGNC:25744]
ENSG00000174606	825	867	1067	827	748	867	804	738	914	537	782	758	protein_coding	1	212992182	213015826	ANGEL2	angel homolog 2 (Drosophila) [Source:HGNC Symbol;Acc:HGNC:30534]
ENSG00000174827	0	0	0	5	2	3	0	0	0	1	1	2	protein_coding	1	145670852	145708148	PDZK1	PDZ domain containing 1 [Source:HGNC Symbol;Acc:HGNC:8821]
ENSG00000174842	385	430	469	448	407	571	334	269	376	248	299	309	protein_coding	1	92246402	92298987	GLMN	glomulin, FKBP associated protein [Source:HGNC Symbol;Acc:HGNC:14373]
ENSG00000174950	6	6	5	8	6	7	4	1	5	5	5	4	protein_coding	1	27379176	27383380	CD164L2	CD164 sialomucin-like 2 [Source:HGNC Symbol;Acc:HGNC:32043]
ENSG00000175087	308	284	367	333	337	413	296	263	308	225	341	311	protein_coding	1	26111165	26125543	PDIK1L	PDLIM1 interacting kinase 1 like [Source:HGNC Symbol;Acc:HGNC:18981]
ENSG00000175130	6459	6599	8349	8314	7762	8778	5769	5616	7271	5097	7017	7073	protein_coding	1	32333832	32336379	MARCKSL1	MARCKS-like 1 [Source:HGNC Symbol;Acc:HGNC:7142]
ENSG00000175137	782	802	1010	989	952	1032	638	616	836	610	855	819	protein_coding	1	248810446	248826633	SH3BP5L	SH3-binding domain protein 5-like [Source:HGNC Symbol;Acc:HGNC:29360]
ENSG00000175147	15	11	22	42	36	37	13	9	9	16	23	25	antisense	1	15111815	15152464	TMEM51-AS1	TMEM51 antisense RNA 1 [Source:HGNC Symbol;Acc:HGNC:26301]
ENSG00000175262	0	1	1	16	11	15	0	1	1	11	15	23	protein_coding	1	10946471	10982037	C1orf127	chromosome 1 open reading frame 127 [Source:HGNC Symbol;Acc:HGNC:26730]
ENSG00000175279	119	114	133	98	107	141	114	90	109	78	87	74	protein_coding	1	10430443	10442809	APITD1	apoptosis-inducing, TAF9-like domain 1 [Source:HGNC Symbol;Acc:HGNC:23163]
ENSG00000175658	0	0	0	1	0	0	0	0	0	0	1	0	processed_pseudogene	1	144274892	144277993	DRD5P2	dopamine receptor D5 pseudogene 2 [Source:HGNC Symbol;Acc:HGNC:3028]
ENSG00000175707	464	420	516	517	469	560	390	382	492	327	473	443	protein_coding	1	26949562	26960406	KDF1	keratinocyte differentiation factor 1 [Source:HGNC Symbol;Acc:HGNC:26624]
ENSG00000175756	1947	2099	2672	2156	1944	2300	1808	1648	2142	1261	1736	1756	protein_coding	1	1373730	1375495	AURKAIP1	aurora kinase A interacting protein 1 [Source:HGNC Symbol;Acc:HGNC:24114]
ENSG00000175793	4	6	3	3	4	8	4	1	2	2	3	3	protein_coding	1	26863138	26864457	SFN	stratifin [Source:HGNC Symbol;Acc:HGNC:10773]
ENSG00000175984	146	162	185	199	191	274	155	125	184	106	185	155	protein_coding	1	114582848	114670422	DENND2C	DENN/MADD domain containing 2C [Source:HGNC Symbol;Acc:HGNC:24748]
ENSG00000176022	1521	1544	1954	1512	1359	1537	1345	1310	1702	892	1256	1200	protein_coding	1	1232265	1235041	B3GALT6	UDP-Gal:betaGal beta 1,3-galactosyltransferase polypeptide 6 [Source:HGNC Symbol;Acc:HGNC:17978]
ENSG00000176092	60	64	93	107	117	141	58	42	68	83	98	94	protein_coding	1	26321859	26354130	AIM1L	absent in melanoma 1-like [Source:HGNC Symbol;Acc:HGNC:17295]
ENSG00000176261	479	512	662	505	448	478	449	418	525	294	396	394	protein_coding	1	32600172	32650903	ZBTB8OS	zinc finger and BTB domain containing 8 opposite strand [Source:HGNC Symbol;Acc:HGNC:24094]
ENSG00000176320	0	1	0	0	0	0	0	0	0	0	0	0	lincRNA	1	158197922	158203877	RP11-404O13.5
ENSG00000176393	2213	2327	2878	2115	2095	2334	1971	1854	2299	1312	1799	1644	protein_coding	1	201982372	202006147	RNPEP	arginyl aminopeptidase (aminopeptidase B) [Source:HGNC Symbol;Acc:HGNC:10078]
ENSG00000176444	1424	1550	2057	1883	1759	1764	1240	1104	1560	927	1483	1463	protein_coding	1	155262868	155278491	CLK2	CDC-like kinase 2 [Source:HGNC Symbol;Acc:HGNC:2069]
ENSG00000176855	3	4	2	3	2	3	3	4	0	2	3	0	processed_pseudogene	1	182959074	182960405	KRT18P28	keratin 18 pseudogene 28 [Source:HGNC Symbol;Acc:HGNC:33397]
ENSG00000177000	734	806	882	1168	1065	1282	640	575	707	660	894	884	protein_coding	1	11785723	11806920	MTHFR	methylenetetrahydrofolate reductase (NAD(P)H) [Source:HGNC Symbol;Acc:HGNC:7436]
ENSG00000177173	7	3	11	7	10	6	10	4	7	5	3	4	processed_pseudogene	1	116532936	116534092	NAP1L4P1	nucleosome assembly protein 1-like 4 pseudogene 1 [Source:HGNC Symbol;Acc:HGNC:39740]
ENSG00000177181	523	563	625	742	716	908	515	522	621	482	637	610	protein_coding	1	42380795	42422578	RIMKLA	ribosomal modification protein rimK-like family member A [Source:HGNC Symbol;Acc:HGNC:28725]
ENSG00000177606	385	368	549	714	623	723	343	287	384	365	556	552	protein_coding	1	58780788	58784327	JUN	jun proto-oncogene [Source:HGNC Symbol;Acc:HGNC:6204]
ENSG00000177614	86	83	102	85	73	89	89	72	81	51	68	61	protein_coding	1	230314482	230425729	PGBD5	piggyBac transposable element derived 5 [Source:HGNC Symbol;Acc:HGNC:19405]
ENSG00000177628	845	851	949	825	809	1031	651	605	792	491	695	653	protein_coding	1	155234452	155244699	GBA	glucosidase, beta, acid [Source:HGNC Symbol;Acc:HGNC:4177]
ENSG00000177674	1633	1670	2071	1214	1111	1468	1547	1392	1662	687	948	911	protein_coding	1	11736084	11754802	AGTRAP	angiotensin II receptor-associated protein [Source:HGNC Symbol;Acc:HGNC:13539]
ENSG00000177757	4	6	11	0	3	2	3	3	6	1	1	1	lincRNA	1	817371	819837	FAM87B	family with sequence similarity 87, member B [Source:HGNC Symbol;Acc:HGNC:32236]
ENSG00000177788	61	58	84	70	63	73	34	37	60	39	45	35	lincRNA	1	229258281	229271028	RP5-1061H20.4
ENSG00000177807	0	0	0	1	0	0	0	0	0	0	0	0	protein_coding	1	160037467	160070248	KCNJ10	potassium inwardly-rectifying channel, subfamily J, member 10 [Source:HGNC Symbol;Acc:HGNC:6256]
ENSG00000177868	107	114	109	106	115	123	92	81	120	54	76	102	protein_coding	1	42807052	42817252	CCDC23	coiled-coil domain containing 23 [Source:HGNC Symbol;Acc:HGNC:29204]
ENSG00000177888	1115	1163	1405	1270	1117	1519	946	927	1213	884	1124	1133	protein_coding	1	197153680	197200542	ZBTB41	zinc finger and BTB domain containing 41 [Source:HGNC Symbol;Acc:HGNC:24819]
ENSG00000177954	7887	7752	10060	8474	8025	9284	6382	6036	7663	5102	7127	6654	protein_coding	1	153990759	153992150	RPS27	ribosomal protein S27 [Source:HGNC Symbol;Acc:HGNC:10416]
ENSG00000178028	826	871	1073	1002	969	1015	701	640	789	439	766	715	protein_coding	1	44213455	44220681	DMAP1	DNA methyltransferase 1 associated protein 1 [Source:HGNC Symbol;Acc:HGNC:18291]
ENSG00000178096	395	372	468	345	355	412	380	334	405	257	331	312	protein_coding	1	149887890	149900798	BOLA1	bolA family member 1 [Source:HGNC Symbol;Acc:HGNC:24263]
ENSG00000178104	604	636	874	915	809	1001	578	526	642	531	774	731	protein_coding	1	148808181	149048286	PDE4DIP	phosphodiesterase 4D interacting protein [Source:HGNC Symbol;Acc:HGNC:15580]
ENSG00000178193	0	2	0	0	0	0	0	1	2	0	0	0	antisense	1	75710003	75724011	RP4-682C21.5
ENSG00000178585	851	872	1083	1062	960	1194	676	603	811	622	792	735	protein_coding	1	9848276	9910336	CTNNBIP1	catenin, beta interacting protein 1 [Source:HGNC Symbol;Acc:HGNC:16913]
ENSG00000178715	11	9	10	11	10	9	6	12	12	4	6	6	processed_pseudogene	1	15828232	15828669	RP11-169K16.8
ENSG00000178796	0	0	0	0	0	0	0	1	0	0	0	0	protein_coding	1	151710433	151729805	RIIAD1	regulatory subunit of type II PKA R-subunit (RIIa) domain containing 1 [Source:HGNC Symbol;Acc:HGNC:26686]
ENSG00000178821	470	537	628	493	442	508	446	423	598	252	361	346	protein_coding	1	1917590	1919273	TMEM52	transmembrane protein 52 [Source:HGNC Symbol;Acc:HGNC:27916]
ENSG00000178922	0	0	0	0	1	1	0	0	0	0	2	0	protein_coding	1	43451003	43453989	HYI	hydroxypyruvate isomerase (putative) [Source:HGNC Symbol;Acc:HGNC:26948]
ENSG00000179023	0	1	0	4	2	1	0	1	0	3	3	6	protein_coding	1	18480982	18486126	KLHDC7A	kelch domain containing 7A [Source:HGNC Symbol;Acc:HGNC:26791]
ENSG00000179051	4224	4367	5437	3386	3194	3722	3622	3366	4321	2661	3615	3377	protein_coding	1	17406760	17439724	RCC2	regulator of chromosome condensation 2 [Source:HGNC Symbol;Acc:HGNC:30297]
ENSG00000179085	298	273	364	287	279	336	238	208	285	187	233	228	protein_coding	1	155139891	155140595	DPM3	dolichyl-phosphate mannosyltransferase polypeptide 3 [Source:HGNC Symbol;Acc:HGNC:3007]
ENSG00000179163	433	404	441	567	561	714	330	299	427	367	489	462	protein_coding	1	23845077	23868294	FUCA1	fucosidase, alpha-L- 1, tissue [Source:HGNC Symbol;Acc:HGNC:4006]
ENSG00000179172	0	0	0	0	0	1	0	1	0	1	1	1	protein_coding	1	12847377	12947578	HNRNPCL1	heterogeneous nuclear ribonucleoprotein C-like 1 [Source:HGNC Symbol;Acc:HGNC:29295]
ENSG00000179178	612	612	822	761	701	840	616	474	617	451	584	516	protein_coding	1	43269994	43274002	TMEM125	transmembrane protein 125 [Source:HGNC Symbol;Acc:HGNC:28275]
ENSG00000179397	2	1	1	3	1	1	0	1	0	0	1	3	protein_coding	1	244454377	244641177	C1orf101	chromosome 1 open reading frame 101 [Source:HGNC Symbol;Acc:HGNC:28491]
ENSG00000179403	1047	1059	1383	1665	1583	1759	788	794	1043	788	1128	1188	protein_coding	1	1434861	1442882	VWA1	von Willebrand factor A domain containing 1 [Source:HGNC Symbol;Acc:HGNC:30910]
ENSG00000179456	226	218	300	316	277	335	221	209	261	246	322	302	protein_coding	1	244048939	244057476	ZBTB18	zinc finger and BTB domain containing 18 [Source:HGNC Symbol;Acc:HGNC:13030]
ENSG00000179571	1	1	0	0	1	0	2	0	0	0	0	0	unprocessed_pseudogene	1	143595216	143635641	NBPF17P	neuroblastoma breakpoint family, member 17, pseudogene [Source:HGNC Symbol;Acc:HGNC:31997]
ENSG00000179639	0	0	0	0	0	1	0	1	0	0	0	0	protein_coding	1	159289714	159308224	FCER1A	Fc fragment of IgE, high affinity I, receptor for; alpha polypeptide [Source:HGNC Symbol;Acc:HGNC:3609]
ENSG00000179743	91	101	128	116	104	120	52	69	110	71	105	104	antisense	1	15834479	15848147	FLJ37453	uncharacterized LOC729614 [Source:EntrezGene;Acc:729614]
ENSG00000179862	68	74	88	107	110	112	61	66	79	63	96	89	protein_coding	1	40861051	40862366	CITED4	Cbp/p300-interacting transactivator, with Glu/Asp-rich carboxy-terminal domain, 4 [Source:HGNC Symbol;Acc:HGNC:18696]
ENSG00000179902	0	0	0	0	0	0	0	0	0	0	1	0	protein_coding	1	109105951	109113857	C1orf194	chromosome 1 open reading frame 194 [Source:HGNC Symbol;Acc:HGNC:32331]
ENSG00000179930	5	1	4	0	4	1	2	1	2	3	4	3	protein_coding	1	182054570	182061712	ZNF648	zinc finger protein 648 [Source:HGNC Symbol;Acc:HGNC:18190]
ENSG00000180098	299	339	421	403	381	417	284	250	297	221	332	307	protein_coding	1	28553085	28578545	TRNAU1AP	tRNA selenocysteine 1 associated protein 1 [Source:HGNC Symbol;Acc:HGNC:30813]
ENSG00000180198	3470	3551	4452	2703	2652	3078	3194	2886	3687	1748	2385	2227	protein_coding	1	28505943	28539300	RCC1	regulator of chromosome condensation 1 [Source:HGNC Symbol;Acc:HGNC:1913]
ENSG00000180287	0	0	0	0	1	0	0	0	0	0	0	0	protein_coding	1	242082986	242524696	PLD5	phospholipase D family, member 5 [Source:HGNC Symbol;Acc:HGNC:26879]
ENSG00000180488	1207	1210	1578	1523	1321	1790	1061	1009	1241	867	1220	1183	protein_coding	1	77779624	77879539	FAM73A	family with sequence similarity 73, member A [Source:HGNC Symbol;Acc:HGNC:24741]
ENSG00000180667	1216	1230	1532	992	925	1161	1112	1049	1396	736	908	893	protein_coding	1	207043849	207052980	YOD1	YOD1 deubiquitinase [Source:HGNC Symbol;Acc:HGNC:25035]
ENSG00000180758	472	405	509	561	480	625	343	328	445	319	368	413	protein_coding	1	9100305	9129170	GPR157	G protein-coupled receptor 157 [Source:HGNC Symbol;Acc:HGNC:23687]
ENSG00000180867	23	35	35	36	27	33	23	20	30	18	24	27	processed_pseudogene	1	147178113	147179622	PDIA3P1	protein disulfide isomerase family A, member 3 pseudogene 1 [Source:HGNC Symbol;Acc:HGNC:4607]
ENSG00000180869	0	0	0	0	0	1	0	0	0	0	0	0	lincRNA	1	84628230	84635020	C1orf180	chromosome 1 open reading frame 180 [Source:HGNC Symbol;Acc:HGNC:26647]
ENSG00000181218	207	219	258	181	138	201	163	175	218	110	144	122	protein_coding	1	228456979	228457873	HIST3H2A	histone cluster 3, H2a [Source:HGNC Symbol;Acc:HGNC:20507]
ENSG00000181450	1206	1186	1494	975	793	1153	1069	977	1220	642	778	773	protein_coding	1	227563543	227677443	ZNF678	zinc finger protein 678 [Source:HGNC Symbol;Acc:HGNC:28652]
ENSG00000181656	0	0	0	0	0	0	0	0	1	0	0	0	protein_coding	1	100538137	100542018	GPR88	G protein-coupled receptor 88 [Source:HGNC Symbol;Acc:HGNC:4539]
ENSG00000181754	181	194	258	380	304	406	173	166	210	190	264	245	protein_coding	1	109504175	109509738	AMIGO1	adhesion molecule with Ig-like domain 1 [Source:HGNC Symbol;Acc:HGNC:20824]
ENSG00000181773	6	9	13	20	14	19	13	5	15	8	16	10	protein_coding	1	27392644	27395814	GPR3	G protein-coupled receptor 3 [Source:HGNC Symbol;Acc:HGNC:4484]
ENSG00000181817	724	790	955	618	633	651	638	536	715	376	480	435	protein_coding	1	36391238	36397892	LSM10	LSM10, U7 small nuclear RNA associated [Source:HGNC Symbol;Acc:HGNC:17562]
ENSG00000181873	657	662	757	757	709	831	469	439	616	354	499	513	protein_coding	1	228165815	228182257	IBA57	IBA57, iron-sulfur cluster assembly homolog (S. cerevisiae) [Source:HGNC Symbol;Acc:HGNC:27302]
ENSG00000182004	2081	2177	2510	1679	1580	1988	2025	1570	2185	1142	1448	1400	protein_coding	1	203861603	203870550	SNRPE	small nuclear ribonucleoprotein polypeptide E [Source:HGNC Symbol;Acc:HGNC:11161]
ENSG00000182109	72	79	102	93	115	86	67	43	80	47	79	70	antisense	1	39522280	39546187	PPIEL	peptidylprolyl isomerase E-like pseudogene [Source:EntrezGene;Acc:728448]
ENSG00000182118	79	81	88	92	94	114	76	52	92	65	100	83	protein_coding	1	231018958	231040246	FAM89A	family with sequence similarity 89, member A [Source:HGNC Symbol;Acc:HGNC:25057]
ENSG00000182134	516	536	654	547	549	634	426	400	481	332	458	415	protein_coding	1	151770107	151791416	TDRKH	tudor and KH domain containing [Source:HGNC Symbol;Acc:HGNC:11713]
ENSG00000182183	0	2	0	1	0	0	0	1	3	0	0	0	protein_coding	1	52633344	52669683	FAM159A	family with sequence similarity 159, member A [Source:HGNC Symbol;Acc:HGNC:28757]
ENSG00000182330	0	0	0	0	0	1	0	0	0	0	0	0	protein_coding	1	13281035	13285174	PRAMEF8	PRAME family member 8 [Source:HGNC Symbol;Acc:HGNC:24074]
ENSG00000182749	1	0	0	3	0	0	0	1	0	1	0	1	protein_coding	1	25861210	25871253	PAQR7	progestin and adipoQ receptor family member VII [Source:HGNC Symbol;Acc:HGNC:23146]
ENSG00000182795	5694	5952	7356	1687	1440	1831	4977	4746	6257	866	1187	1231	protein_coding	1	207018521	207032756	C1orf116	chromosome 1 open reading frame 116 [Source:HGNC Symbol;Acc:HGNC:28667]
ENSG00000182827	1380	1433	1803	1423	1223	1516	1255	1159	1414	856	1163	1109	protein_coding	1	226144679	226186730	ACBD3	acyl-CoA binding domain containing 3 [Source:HGNC Symbol;Acc:HGNC:15453]
ENSG00000182866	1	0	1	0	0	1	0	0	1	1	0	1	protein_coding	1	32251239	32286165	LCK	LCK proto-oncogene, Src family tyrosine kinase [Source:HGNC Symbol;Acc:HGNC:6524]
ENSG00000182873	22	32	36	57	54	63	22	29	27	17	30	31	antisense	1	2181794	2184389	RP11-181G12.2
ENSG00000182898	0	0	1	0	0	0	0	0	0	0	0	0	protein_coding	1	152084144	152089064	TCHHL1	trichohyalin-like 1 [Source:HGNC Symbol;Acc:HGNC:31796]
ENSG00000183114	0	0	0	0	1	0	0	0	0	0	2	0	protein_coding	1	20552439	20555010	FAM43B	family with sequence similarity 43, member B [Source:HGNC Symbol;Acc:HGNC:31791]
ENSG00000183155	348	334	419	368	312	408	275	239	328	196	250	235	protein_coding	1	202878957	202889135	RABIF	RAB interacting factor [Source:HGNC Symbol;Acc:HGNC:9797]
ENSG00000183291	2616	2629	3125	2330	2103	2868	2426	2235	2827	1553	2080	1913	protein_coding	1	86862445	86914424	SEP15	15 kDa selenoprotein isoform 1 precursor [Source:RefSeq peptide;Acc:NP_004252]
ENSG00000183298	7	5	5	6	4	7	4	8	6	4	1	1	processed_pseudogene	1	101786340	101787219	RP11-556K13.1
ENSG00000183317	201	210	234	358	390	411	156	128	193	159	256	247	protein_coding	1	37713880	37765133	EPHA10	EPH receptor A10 [Source:HGNC Symbol;Acc:HGNC:19987]
ENSG00000183347	0	0	1	0	0	0	0	0	0	0	0	0	protein_coding	1	89364058	89386461	GBP6	guanylate binding protein family, member 6 [Source:HGNC Symbol;Acc:HGNC:25395]
ENSG00000183386	43	39	74	104	85	83	45	42	46	26	83	66	protein_coding	1	37996770	38005606	FHL3	four and a half LIM domains 3 [Source:HGNC Symbol;Acc:HGNC:3704]
ENSG00000183431	3001	3087	3832	2483	2171	2756	2708	2569	3209	1560	2120	2043	protein_coding	1	37956975	37990921	SF3A3	splicing factor 3a, subunit 3, 60kDa [Source:HGNC Symbol;Acc:HGNC:10767]
ENSG00000183508	212	239	281	342	304	339	275	268	272	316	427	439	protein_coding	1	117605934	117628372	FAM46C	family with sequence similarity 46, member C [Source:HGNC Symbol;Acc:HGNC:24712]
ENSG00000183520	1535	1529	1972	1127	1003	1332	1391	1310	1682	717	968	968	protein_coding	1	38009258	38024824	UTP11L	UTP11-like, U3 small nucleolar ribonucleoprotein (yeast) [Source:HGNC Symbol;Acc:HGNC:24329]
ENSG00000183598	1	0	0	1	0	1	1	1	1	0	0	0	protein_coding	1	149813271	149813681	HIST2H3D	histone cluster 2, H3d [Source:HGNC Symbol;Acc:HGNC:25311]
ENSG00000183615	12	6	16	10	18	21	7	7	10	7	6	9	protein_coding	1	32247233	32248856	FAM167B	family with sequence similarity 167, member B [Source:HGNC Symbol;Acc:HGNC:28133]
ENSG00000183682	3	0	1	10	7	15	3	3	4	3	5	4	protein_coding	1	39491646	39525935	BMP8A	bone morphogenetic protein 8a [Source:HGNC Symbol;Acc:HGNC:21650]
ENSG00000183726	643	632	853	470	469	603	606	540	724	292	408	378	protein_coding	1	25337917	25362361	TMEM50A	transmembrane protein 50A [Source:HGNC Symbol;Acc:HGNC:30590]
ENSG00000183780	5	3	4	89	65	91	9	5	11	52	102	111	protein_coding	1	233904933	234324516	SLC35F3	solute carrier family 35, member F3 [Source:HGNC Symbol;Acc:HGNC:23616]
ENSG00000183814	440	456	625	447	420	477	403	386	500	291	454	421	protein_coding	1	226231149	226309869	LIN9	lin-9 DREAM MuvB core complex component [Source:HGNC Symbol;Acc:HGNC:30830]
ENSG00000183831	0	0	1	2	0	2	1	0	0	1	0	3	protein_coding	1	173609561	173669862	ANKRD45	ankyrin repeat domain 45 [Source:HGNC Symbol;Acc:HGNC:24786]
ENSG00000183853	30	23	46	103	94	107	52	36	46	87	104	121	protein_coding	1	157993273	158100262	KIRREL	kin of IRRE like (Drosophila) [Source:HGNC Symbol;Acc:HGNC:15734]
ENSG00000183856	1484	1509	1878	1526	1526	1624	1167	1054	1411	911	1353	1257	protein_coding	1	156525405	156572604	IQGAP3	IQ motif containing GTPase activating protein 3 [Source:HGNC Symbol;Acc:HGNC:20669]
ENSG00000183929	1	2	1	1	6	6	1	5	1	2	8	4	processed_pseudogene	1	228650241	228651379	DUSP5P1	dual specificity phosphatase 5 pseudogene 1 [Source:HGNC Symbol;Acc:HGNC:32020]
ENSG00000184005	0	1	0	0	0	0	0	0	0	0	0	0	protein_coding	1	76074719	76634601	ST6GALNAC3	ST6 (alpha-N-acetyl-neuraminyl-2,3-beta-galactosyl-1,3)-N-acetylgalactosaminide alpha-2,6-sialyltransferase 3 [Source:HGNC Symbol;Acc:HGNC:19343]
ENSG00000184007	3397	3321	4272	3476	3059	4066	3075	2943	3839	2295	3136	3107	protein_coding	1	31906421	31944856	PTP4A2	protein tyrosine phosphatase type IVA, member 2 [Source:HGNC Symbol;Acc:HGNC:9635]
ENSG00000184144	11	14	16	43	39	45	8	2	3	19	24	29	protein_coding	1	205043197	205078499	CNTN2	contactin 2 (axonal) [Source:HGNC Symbol;Acc:HGNC:2172]
ENSG00000184148	0	0	0	0	0	0	0	0	1	0	0	0	protein_coding	1	152970666	152972574	SPRR4	small proline-rich protein 4 [Source:HGNC Symbol;Acc:HGNC:23173]
ENSG00000184163	13	5	12	24	24	11	8	1	10	4	9	14	protein_coding	1	1242446	1246722	FAM132A	family with sequence similarity 132, member A [Source:HGNC Symbol;Acc:HGNC:32308]
ENSG00000184260	16	8	12	16	15	18	8	14	13	11	14	11	protein_coding	1	149886975	149887364	HIST2H2AC	histone cluster 2, H2ac [Source:HGNC Symbol;Acc:HGNC:4738]
ENSG00000184270	2	1	1	1	0	0	3	2	1	1	0	1	protein_coding	1	149887524	149887916	HIST2H2AB	histone cluster 2, H2ab [Source:HGNC Symbol;Acc:HGNC:20508]
ENSG00000184292	16	19	21	11	15	9	18	7	10	5	5	2	protein_coding	1	58575423	58577773	TACSTD2	tumor-associated calcium signal transducer 2 [Source:HGNC Symbol;Acc:HGNC:11530]
ENSG00000184313	0	2	1	2	4	7	0	0	0	0	1	3	protein_coding	1	54641754	54710266	MROH7	maestro heat-like repeat family member 7 [Source:HGNC Symbol;Acc:HGNC:24802]
ENSG00000184371	3	0	5	10	10	7	1	2	4	3	6	5	protein_coding	1	109910242	109930992	CSF1	colony stimulating factor 1 (macrophage) [Source:HGNC Symbol;Acc:HGNC:2432]
ENSG00000184389	0	0	1	1	2	2	0	0	0	2	0	0	protein_coding	1	33306766	33321098	A3GALT2	alpha 1,3-galactosyltransferase 2 [Source:HGNC Symbol;Acc:HGNC:30005]
ENSG00000184454	0	0	0	1	2	2	2	0	0	3	3	3	protein_coding	1	24556111	24609328	NCMAP	noncompact myelin associated protein [Source:HGNC Symbol;Acc:HGNC:29332]
ENSG00000184588	8	9	8	2	2	1	10	8	12	5	6	7	protein_coding	1	65792514	66374579	PDE4B	phosphodiesterase 4B, cAMP-specific [Source:HGNC Symbol;Acc:HGNC:8781]
ENSG00000184599	1	1	0	1	6	3	5	2	1	5	2	7	protein_coding	1	112720419	112727235	FAM19A3	family with sequence similarity 19 (chemokine (C-C motif)-like), member A3 [Source:HGNC Symbol;Acc:HGNC:21590]
ENSG00000184677	868	892	1126	1081	961	1128	679	667	850	629	842	760	protein_coding	1	22451851	22531157	ZBTB40	zinc finger and BTB domain containing 40 [Source:HGNC Symbol;Acc:HGNC:29045]
ENSG00000184678	1236	1188	1551	1522	1314	1657	812	838	1097	465	550	581	protein_coding	1	149842204	149886652	HIST2H2BE	histone cluster 2, H2be [Source:HGNC Symbol;Acc:HGNC:4760]
ENSG00000184774	1	0	1	0	1	2	1	0	0	0	0	4	transcribed_unitary_pseudogene	1	202820266	202827225	MGAT4EP	MGAT4 family, member E, pseudogene [Source:HGNC Symbol;Acc:HGNC:49418]
ENSG00000185031	0	0	1	1	0	0	0	0	0	0	0	0	processed_pseudogene	1	64984608	64986087	SLC2A3P2	solute carrier family 2 (facilitated glucose transporter), member 3 pseudogene 2 [Source:HGNC Symbol;Acc:HGNC:31074]
ENSG00000185090	542	545	640	451	389	533	458	417	538	257	372	337	protein_coding	1	37793802	37801137	MANEAL	mannosidase, endo-alpha-like [Source:HGNC Symbol;Acc:HGNC:26452]
ENSG00000185104	1635	1589	2021	1469	1348	1673	1483	1269	1643	971	1257	1225	protein_coding	1	50439478	50960263	FAF1	Fas (TNFRSF6) associated factor 1 [Source:HGNC Symbol;Acc:HGNC:3578]
ENSG00000185155	0	0	0	0	0	0	0	0	0	0	1	0	protein_coding	1	226223618	226227054	MIXL1	Mix paired-like homeobox [Source:HGNC Symbol;Acc:HGNC:13363]
ENSG00000185220	199	220	293	323	281	376	191	165	236	168	246	228	protein_coding	1	248906196	248919946	PGBD2	piggyBac transposable element derived 2 [Source:HGNC Symbol;Acc:HGNC:19399]
ENSG00000185278	1656	1714	2101	1482	1384	1802	1393	1361	1572	1021	1365	1299	protein_coding	1	173868082	173903549	ZBTB37	zinc finger and BTB domain containing 37 [Source:HGNC Symbol;Acc:HGNC:28365]
ENSG00000185420	451	489	602	584	616	689	442	398	529	393	547	527	protein_coding	1	245749342	246507312	SMYD3	SET and MYND domain containing 3 [Source:HGNC Symbol;Acc:HGNC:15513]
ENSG00000185436	0	1	0	0	0	1	0	0	0	0	0	1	protein_coding	1	24154157	24187959	IFNLR1	interferon, lambda receptor 1 [Source:HGNC Symbol;Acc:HGNC:18584]
ENSG00000185483	248	278	345	267	205	240	285	250	296	162	220	201	protein_coding	1	63774022	64181498	ROR1	receptor tyrosine kinase-like orphan receptor 1 [Source:HGNC Symbol;Acc:HGNC:10256]
ENSG00000185495	63	75	89	63	83	69	44	50	55	27	48	54	transcribed_unprocessed_pseudogene	1	223992743	224010612	SEPT7P9	septin 7 pseudogene 9 [Source:EntrezGene;Acc:285961]
ENSG00000185499	5	8	12	9	15	12	3	7	6	8	14	12	protein_coding	1	155185824	155192916	MUC1	mucin 1, cell surface associated [Source:HGNC Symbol;Acc:HGNC:7508]
ENSG00000185519	0	2	0	8	0	6	0	0	1	1	5	10	protein_coding	1	16057769	16073632	FAM131C	family with sequence similarity 131, member C [Source:HGNC Symbol;Acc:HGNC:26717]
ENSG00000185523	2	1	1	1	1	0	0	0	2	0	0	3	protein_coding	1	212830141	212847649	SPATA45	spermatogenesis associated 45 [Source:HGNC Symbol;Acc:HGNC:33709]
ENSG00000185630	342	333	412	912	807	959	302	262	340	624	810	793	protein_coding	1	164555584	164899296	PBX1	pre-B-cell leukemia homeobox 1 [Source:HGNC Symbol;Acc:HGNC:8632]
ENSG00000185668	2	0	0	1	0	0	0	0	0	0	1	0	protein_coding	1	38043827	38046794	POU3F1	POU class 3 homeobox 1 [Source:HGNC Symbol;Acc:HGNC:9214]
ENSG00000185839	0	0	0	0	0	0	0	0	0	0	0	1	processed_pseudogene	1	58630841	58631530	RP4-592A1.2
ENSG00000185842	241	261	336	306	259	332	241	218	262	208	227	252	protein_coding	1	224896262	225399292	DNAH14	dynein, axonemal, heavy chain 14 [Source:HGNC Symbol;Acc:HGNC:2945]
ENSG00000185860	0	0	1	1	0	0	1	0	1	0	0	0	protein_coding	1	162824458	162868815	C1orf110	chromosome 1 open reading frame 110 [Source:HGNC Symbol;Acc:HGNC:28736]
ENSG00000185946	171	157	213	194	213	220	154	152	161	116	202	150	protein_coding	1	103525691	103555239	RNPC3	RNA-binding region (RNP1, RRM) containing 3 [Source:HGNC Symbol;Acc:HGNC:18666]
ENSG00000186056	127	126	150	156	148	171	110	81	136	62	112	101	antisense	1	30718504	30726827	MATN1-AS1	MATN1 antisense RNA 1 [Source:HGNC Symbol;Acc:HGNC:40364]
ENSG00000186063	5230	4861	6127	27428	24923	33592	2927	2651	3417	9303	12605	13133	protein_coding	1	222668013	222713210	AIDA	axin interactor, dorsalization associated [Source:HGNC Symbol;Acc:HGNC:25761]
ENSG00000186094	3	0	1	1	2	0	0	0	1	0	4	1	protein_coding	1	48532855	50023913	AGBL4	ATP/GTP binding protein-like 4 [Source:HGNC Symbol;Acc:HGNC:25892]
ENSG00000186118	2	0	4	6	9	6	0	2	3	0	2	0	protein_coding	1	46668855	46673594	TEX38	testis expressed 38 [Source:HGNC Symbol;Acc:HGNC:29589]
ENSG00000186141	365	366	460	380	378	461	292	306	403	216	315	331	protein_coding	1	145824088	145842505	POLR3C	polymerase (RNA) III (DNA directed) polypeptide C (62kD) [Source:HGNC Symbol;Acc:HGNC:30076]
ENSG00000186150	1	1	1	2	1	3	0	0	1	0	2	1	protein_coding	1	110112468	110113945	UBL4B	ubiquitin-like 4B [Source:HGNC Symbol;Acc:HGNC:32309]
ENSG00000186160	2	3	1	5	6	5	2	0	1	5	3	4	protein_coding	1	47067488	47118319	CYP4Z1	cytochrome P450, family 4, subfamily Z, polypeptide 1 [Source:HGNC Symbol;Acc:HGNC:20583]
ENSG00000186197	0	1	0	1	2	0	0	1	1	0	2	2	protein_coding	1	236348262	236484914	EDARADD	EDAR-associated death domain [Source:HGNC Symbol;Acc:HGNC:14341]
ENSG00000186205	3759	3843	4946	3281	2984	3751	3377	3032	3984	1928	2807	2696	protein_coding	1	220786759	220819657	MARC1	mitochondrial amidoxime reducing component 1 [Source:HGNC Symbol;Acc:HGNC:26189]
ENSG00000186226	0	0	0	0	0	0	1	0	0	0	0	0	protein_coding	1	152786214	152788426	LCE1E	late cornified envelope 1E [Source:HGNC Symbol;Acc:HGNC:29466]
ENSG00000186283	1447	1514	1842	1152	1130	1298	1269	1111	1561	852	1076	1037	protein_coding	1	179081377	179098023	TOR3A	torsin family 3, member A [Source:HGNC Symbol;Acc:HGNC:11997]
ENSG00000186301	15	16	13	21	34	30	18	9	14	15	25	22	unprocessed_pseudogene	1	16645622	16650289	MST1P2	macrophage stimulating 1 (hepatocyte growth factor-like) pseudogene 2 [Source:HGNC Symbol;Acc:HGNC:7383]
ENSG00000186364	13	9	9	28	27	17	9	10	9	14	27	14	protein_coding	1	145845629	145848953	NUDT17	nudix (nucleoside diphosphate linked moiety X)-type motif 17 [Source:HGNC Symbol;Acc:HGNC:26618]
ENSG00000186377	1	1	0	6	7	4	0	1	3	8	2	2	protein_coding	1	47023568	47050751	CYP4X1	cytochrome P450, family 4, subfamily X, polypeptide 1 [Source:HGNC Symbol;Acc:HGNC:20244]
ENSG00000186409	41	46	63	86	80	91	36	38	38	48	69	61	protein_coding	1	42463330	42654664	CCDC30	coiled-coil domain containing 30 [Source:HGNC Symbol;Acc:HGNC:26103]
ENSG00000186501	931	957	1136	876	838	929	764	651	890	467	682	619	protein_coding	1	27322145	27336400	TMEM222	transmembrane protein 222 [Source:HGNC Symbol;Acc:HGNC:25363]
ENSG00000186517	6	7	5	8	10	7	6	4	2	3	6	1	protein_coding	1	161046946	161069970	ARHGAP30	Rho GTPase activating protein 30 [Source:HGNC Symbol;Acc:HGNC:27414]
ENSG00000186564	7	7	11	14	19	14	11	5	11	8	18	19	protein_coding	1	47436017	47440691	FOXD2	forkhead box D2 [Source:HGNC Symbol;Acc:HGNC:3803]
ENSG00000186715	4	7	11	9	8	12	4	3	4	4	9	12	transcribed_unprocessed_pseudogene	1	16754910	16770237	MST1L	macrophage stimulating 1-like [Source:HGNC Symbol;Acc:HGNC:7390]
ENSG00000186790	0	0	0	0	0	0	0	1	0	0	0	1	protein_coding	1	47416072	47418052	FOXE3	forkhead box E3 [Source:HGNC Symbol;Acc:HGNC:3808]
ENSG00000186827	0	0	0	0	1	0	0	0	0	1	0	2	protein_coding	1	1211326	1214138	TNFRSF4	tumor necrosis factor receptor superfamily, member 4 [Source:HGNC Symbol;Acc:HGNC:11918]
ENSG00000186891	1	0	0	0	0	0	0	0	0	0	0	1	protein_coding	1	1203508	1206691	TNFRSF18	tumor necrosis factor receptor superfamily, member 18 [Source:HGNC Symbol;Acc:HGNC:11914]
ENSG00000186973	2	1	6	5	2	4	3	0	0	3	0	1	protein_coding	1	43145153	43156396	FAM183A	family with sequence similarity 183, member A [Source:HGNC Symbol;Acc:HGNC:34347]
ENSG00000187010	0	0	0	0	0	0	0	1	0	0	0	0	protein_coding	1	25272393	25330445	RHD	Rh blood group, D antigen [Source:HGNC Symbol;Acc:HGNC:10009]
ENSG00000187017	16	16	15	59	51	56	9	18	14	36	52	45	protein_coding	1	6424788	6461370	ESPN	espin [Source:HGNC Symbol;Acc:HGNC:13281]
ENSG00000187048	0	0	1	0	1	2	0	0	0	1	4	4	protein_coding	1	46929177	46941484	CYP4A11	cytochrome P450, family 4, subfamily A, polypeptide 11 [Source:HGNC Symbol;Acc:HGNC:2642]
ENSG00000187080	0	1	0	0	0	0	0	0	0	0	0	0	protein_coding	1	247965233	247966339	OR2AK2	olfactory receptor, family 2, subfamily AK, member 2 [Source:HGNC Symbol;Acc:HGNC:19569]
ENSG00000187140	9	7	9	16	20	20	9	14	9	10	19	22	protein_coding	1	63323041	63325126	FOXD3	forkhead box D3 [Source:HGNC Symbol;Acc:HGNC:3804]
ENSG00000187144	0	0	0	0	0	0	1	0	2	0	0	0	protein_coding	1	16387117	16437424	SPATA21	spermatogenesis associated 21 [Source:HGNC Symbol;Acc:HGNC:28026]
ENSG00000187147	1420	1595	1926	1550	1405	1637	1359	1206	1526	945	1375	1236	protein_coding	1	44405194	44651724	RNF220	ring finger protein 220 [Source:HGNC Symbol;Acc:HGNC:25552]
ENSG00000187554	39	61	54	94	85	100	53	49	49	62	92	80	protein_coding	1	223109406	223143282	TLR5	toll-like receptor 5 [Source:HGNC Symbol;Acc:HGNC:11851]
ENSG00000187583	206	229	282	244	284	296	182	134	191	156	173	199	protein_coding	1	966497	975865	PLEKHN1	pleckstrin homology domain containing, family N member 1 [Source:HGNC Symbol;Acc:HGNC:25284]
ENSG00000187608	305	333	398	467	423	499	236	149	231	175	216	205	protein_coding	1	1001138	1014541	ISG15	ISG15 ubiquitin-like modifier [Source:HGNC Symbol;Acc:HGNC:4053]
ENSG00000187634	498	449	636	1084	953	999	267	271	348	395	585	573	protein_coding	1	924880	944581	SAMD11	sterile alpha motif domain containing 11 [Source:HGNC Symbol;Acc:HGNC:28706]
ENSG00000187642	9	6	11	18	12	10	3	7	8	3	14	8	protein_coding	1	975204	982093	PERM1	PPARGC1 and ESRR induced regulator, muscle 1 [Source:HGNC Symbol;Acc:HGNC:28208]
ENSG00000187730	13	7	13	17	23	29	6	6	6	12	14	8	protein_coding	1	2019324	2030751	GABRD	gamma-aminobutyric acid (GABA) A receptor, delta [Source:HGNC Symbol;Acc:HGNC:4084]
ENSG00000187800	1	0	1	3	0	0	0	0	0	0	1	0	protein_coding	1	156893698	156916434	PEAR1	platelet endothelial aggregation receptor 1 [Source:HGNC Symbol;Acc:HGNC:33631]
ENSG00000187801	238	214	287	203	189	231	224	208	252	145	227	195	protein_coding	1	40450102	40463718	ZFP69B	ZFP69 zinc finger protein B [Source:HGNC Symbol;Acc:HGNC:28053]
ENSG00000187815	0	1	0	1	1	0	1	0	1	0	0	1	protein_coding	1	40477215	40496343	ZFP69	ZFP69 zinc finger protein [Source:HGNC Symbol;Acc:HGNC:24708]
ENSG00000187862	0	0	0	0	1	0	0	0	1	0	0	0	protein_coding	1	156579727	156586770	TTC24	tetratricopeptide repeat domain 24 [Source:HGNC Symbol;Acc:HGNC:32348]
ENSG00000187889	12	23	30	13	6	9	19	19	25	7	9	9	protein_coding	1	56718804	56819696	C1orf168	chromosome 1 open reading frame 168 [Source:HGNC Symbol;Acc:HGNC:27295]
ENSG00000187952	0	0	0	0	1	0	0	0	0	0	0	0	processed_pseudogene	1	21428303	21429536	HS6ST1P1	heparan sulfate 6-O-sulfotransferase 1 pseudogene 1 [Source:HGNC Symbol;Acc:HGNC:31835]
ENSG00000187961	913	967	1143	1069	1075	964	732	592	887	534	859	842	protein_coding	1	960587	965715	KLHL17	kelch-like family member 17 [Source:HGNC Symbol;Acc:HGNC:24023]
ENSG00000187980	0	0	0	1	0	0	0	0	0	0	0	0	protein_coding	1	20161253	20177424	PLA2G2C	phospholipase A2, group IIC [Source:HGNC Symbol;Acc:HGNC:9032]
ENSG00000188004	0	0	0	0	1	0	0	0	0	0	0	0	protein_coding	1	159834474	159855347	C1orf204	chromosome 1 open reading frame 204 [Source:HGNC Symbol;Acc:HGNC:27647]
ENSG00000188015	0	0	1	0	0	0	0	0	0	0	0	0	protein_coding	1	153547329	153549372	S100A3	S100 calcium binding protein A3 [Source:HGNC Symbol;Acc:HGNC:10493]
ENSG00000188092	56	57	79	62	54	74	56	50	53	43	50	53	protein_coding	1	147928393	147993521	GPR89B	G protein-coupled receptor 89B [Source:HGNC Symbol;Acc:HGNC:13840]
ENSG00000188157	1778	1895	2293	3454	3474	3571	1484	1267	1672	1789	2636	2527	protein_coding	1	1020123	1056118	AGRN	agrin [Source:HGNC Symbol;Acc:HGNC:329]
ENSG00000188206	439	435	529	508	518	506	382	352	429	280	456	454	antisense	1	244840638	244846903	HNRNPU-AS1	HNRNPU antisense RNA 1 [Source:HGNC Symbol;Acc:HGNC:27651]
ENSG00000188257	10	9	15	448	436	459	10	18	20	126	219	179	protein_coding	1	19975431	19980416	PLA2G2A	phospholipase A2, group IIA (platelets, synovial fluid) [Source:HGNC Symbol;Acc:HGNC:9031]
ENSG00000188290	266	233	347	313	293	255	207	195	251	176	258	275	protein_coding	1	998962	1000172	HES4	hes family bHLH transcription factor 4 [Source:HGNC Symbol;Acc:HGNC:24149]
ENSG00000188295	188	189	252	186	219	245	173	175	205	135	166	166	protein_coding	1	247099962	247104372	ZNF669	zinc finger protein 669 [Source:HGNC Symbol;Acc:HGNC:25736]
ENSG00000188396	1	2	1	17	13	5	0	2	0	7	5	3	protein_coding	1	44805913	44806675	TCTEX1D4	Tctex1 domain containing 4 [Source:HGNC Symbol;Acc:HGNC:32315]
ENSG00000188404	24	28	39	14	13	21	21	25	27	11	14	10	protein_coding	1	169690667	169711698	SELL	selectin L [Source:HGNC Symbol;Acc:HGNC:10720]
ENSG00000188460	1	1	2	1	0	1	4	1	2	0	0	0	processed_pseudogene	1	223863726	223864851	ACTBP11	actin, beta pseudogene 11 [Source:HGNC Symbol;Acc:HGNC:33971]
ENSG00000188529	2545	2618	3381	2443	2227	2753	2222	1940	2614	1484	1910	1904	protein_coding	1	23964804	23980927	SRSF10	serine/arginine-rich splicing factor 10 [Source:HGNC Symbol;Acc:HGNC:16713]
ENSG00000188610	176	176	235	142	130	148	167	183	195	109	144	149	protein_coding	1	121167646	121185539	FAM72B	family with sequence similarity 72, member B [Source:HGNC Symbol;Acc:HGNC:24805]
ENSG00000188641	6	3	6	7	4	5	44	30	41	11	15	19	protein_coding	1	97077743	97921049	DPYD	dihydropyrimidine dehydrogenase [Source:HGNC Symbol;Acc:HGNC:3012]
ENSG00000188643	1	0	0	0	5	4	0	0	0	1	1	1	protein_coding	1	153606886	153613145	S100A16	S100 calcium binding protein A16 [Source:HGNC Symbol;Acc:HGNC:20441]
ENSG00000188672	1	4	2	2	0	6	2	0	0	2	5	0	protein_coding	1	25362249	25430192	RHCE	Rh blood group, CcEe antigens [Source:HGNC Symbol;Acc:HGNC:10008]
ENSG00000188739	9	8	6	14	11	11	13	10	11	10	5	12	protein_coding	1	235131183	235161457	RBM34	RNA binding motif protein 34 [Source:HGNC Symbol;Acc:HGNC:28965]
ENSG00000188761	5	4	5	6	6	6	2	7	0	2	3	2	protein_coding	1	113878168	113887547	BCL2L15	BCL2-like 15 [Source:HGNC Symbol;Acc:HGNC:33624]
ENSG00000188770	0	0	1	0	0	0	0	0	0	0	0	0	protein_coding	1	203494143	203508864	OPTC	opticin [Source:HGNC Symbol;Acc:HGNC:8158]
ENSG00000188782	0	0	0	1	0	0	1	0	1	1	1	0	protein_coding	1	26190561	26202968	CATSPER4	cation channel, sperm associated 4 [Source:HGNC Symbol;Acc:HGNC:23220]
ENSG00000188783	0	1	1	0	0	0	0	0	0	0	0	1	protein_coding	1	203475828	203491352	PRELP	proline/arginine-rich end leucine-rich repeat protein [Source:HGNC Symbol;Acc:HGNC:9357]
ENSG00000188786	774	800	1006	889	707	922	696	708	887	508	676	627	protein_coding	1	37809567	37859620	MTF1	metal-regulatory transcription factor 1 [Source:HGNC Symbol;Acc:HGNC:7428]
ENSG00000188800	1	0	1	1	0	0	0	0	0	0	0	0	protein_coding	1	40245947	40251691	TMCO2	transmembrane and coiled-coil domains 2 [Source:HGNC Symbol;Acc:HGNC:23312]
ENSG00000188807	1271	1331	1598	998	964	1084	1020	977	1210	523	771	739	protein_coding	1	9588922	9614873	TMEM201	transmembrane protein 201 [Source:HGNC Symbol;Acc:HGNC:33719]
ENSG00000188822	0	0	0	0	1	1	0	0	1	0	0	0	protein_coding	1	23870526	23913362	CNR2	cannabinoid receptor 2 (macrophage) [Source:HGNC Symbol;Acc:HGNC:2160]
ENSG00000188931	0	0	0	0	0	1	0	0	0	0	0	0	protein_coding	1	161364731	161367874	C1orf192	chromosome 1 open reading frame 192 [Source:HGNC Symbol;Acc:HGNC:32325]
ENSG00000188976	5518	5623	7288	4999	4776	5699	4834	4543	5796	2906	4229	4020	protein_coding	1	944204	959309	NOC2L	nucleolar complex associated 2 homolog (S. cerevisiae) [Source:HGNC Symbol;Acc:HGNC:24517]
ENSG00000189030	0	0	0	0	0	1	0	1	0	0	1	0	protein_coding	1	156298624	156299299	VHLL	von Hippel-Lindau tumor suppressor-like [Source:HGNC Symbol;Acc:HGNC:30666]
ENSG00000189171	96	106	118	105	119	120	91	80	76	60	125	112	protein_coding	1	153618787	153634092	S100A13	S100 calcium binding protein A13 [Source:HGNC Symbol;Acc:HGNC:10490]
ENSG00000189195	24	34	29	32	30	59	32	18	19	32	32	34	protein_coding	1	92080305	92147836	BTBD8	BTB (POZ) domain containing 8 [Source:HGNC Symbol;Acc:HGNC:21019]
ENSG00000189266	1859	1880	2403	2132	1869	2282	1682	1471	1960	1400	1841	1763	protein_coding	1	23959109	23963462	PNRC2	proline-rich nuclear receptor coactivator 2 [Source:HGNC Symbol;Acc:HGNC:23158]
ENSG00000189280	0	0	0	0	0	0	0	0	0	1	0	1	protein_coding	1	34755047	34758512	GJB5	gap junction protein, beta 5, 31.1kDa [Source:HGNC Symbol;Acc:HGNC:4287]
ENSG00000189334	2	1	0	1	2	1	1	0	0	2	4	1	protein_coding	1	153614255	153616986	S100A14	S100 calcium binding protein A14 [Source:HGNC Symbol;Acc:HGNC:18901]
ENSG00000189337	155	124	156	177	202	216	115	92	138	115	181	156	protein_coding	1	14598704	15118043	KAZN	kazrin, periplakin interacting protein [Source:HGNC Symbol;Acc:HGNC:29173]
ENSG00000189339	3435	3477	4535	3996	3816	4442	2890	2597	3413	2239	3353	3133	protein_coding	1	1659529	1692728	SLC35E2B	solute carrier family 35, member E2B [Source:HGNC Symbol;Acc:HGNC:33941]
ENSG00000189409	5	5	8	22	18	17	2	3	4	3	10	9	protein_coding	1	1632095	1701810	MMP23B	matrix metallopeptidase 23B [Source:HGNC Symbol;Acc:HGNC:7171]
ENSG00000189410	0	0	1	0	3	0	2	1	1	0	0	0	protein_coding	1	20719732	20732837	SH2D5	SH2 domain containing 5 [Source:HGNC Symbol;Acc:HGNC:28819]
ENSG00000196154	6	3	9	8	5	4	8	2	5	5	3	8	protein_coding	1	153543613	153550136	S100A4	S100 calcium binding protein A4 [Source:HGNC Symbol;Acc:HGNC:10494]
ENSG00000196182	1672	1641	2101	1244	1160	1542	1247	1143	1491	829	1141	1017	protein_coding	1	36339624	36385896	STK40	serine/threonine kinase 40 [Source:HGNC Symbol;Acc:HGNC:21373]
ENSG00000196187	521	531	687	741	690	765	433	432	476	384	638	607	protein_coding	1	225845536	225882369	TMEM63A	transmembrane protein 63A [Source:HGNC Symbol;Acc:HGNC:29118]
ENSG00000196188	0	0	0	0	0	0	0	0	1	0	0	0	protein_coding	1	206009264	206023909	CTSE	cathepsin E [Source:HGNC Symbol;Acc:HGNC:2530]
ENSG00000196189	1472	1489	1956	1211	1108	1406	1112	1057	1304	575	850	802	protein_coding	1	156147366	156177752	SEMA4A	sema domain, immunoglobulin domain (Ig), transmembrane domain (TM) and short cytoplasmic domain, (semaphorin) 4A [Source:HGNC Symbol;Acc:HGNC:10729]
ENSG00000196352	113	137	143	205	190	213	198	237	269	509	664	566	protein_coding	1	207321508	207360966	CD55	CD55 molecule, decay accelerating factor for complement (Cromer blood group) [Source:HGNC Symbol;Acc:HGNC:2665]
ENSG00000196369	150	144	167	236	228	258	140	131	149	181	213	213	protein_coding	1	144887265	145095528	SRGAP2B	SLIT-ROBO Rho GTPase activating protein 2B [Source:HGNC Symbol;Acc:HGNC:35237]
ENSG00000196407	0	1	0	0	0	0	0	0	1	0	0	1	protein_coding	1	151847263	151853697	THEM5	thioesterase superfamily member 5 [Source:HGNC Symbol;Acc:HGNC:26755]
ENSG00000196418	259	279	344	209	203	250	225	223	250	149	175	195	protein_coding	1	247121975	247172016	ZNF124	zinc finger protein 124 [Source:HGNC Symbol;Acc:HGNC:12907]
ENSG00000196449	658	679	831	512	487	529	597	495	714	275	355	347	protein_coding	1	37802944	37808185	YRDC	yrdC N(6)-threonylcarbamoyltransferase domain containing [Source:HGNC Symbol;Acc:HGNC:28905]
ENSG00000196482	9	3	7	9	11	12	3	2	9	8	4	11	protein_coding	1	216503246	217137755	ESRRG	estrogen-related receptor gamma [Source:HGNC Symbol;Acc:HGNC:3474]
ENSG00000196505	739	748	962	932	777	1036	610	587	758	580	817	734	protein_coding	1	117863485	117929630	GDAP2	ganglioside induced differentiation associated protein 2 [Source:HGNC Symbol;Acc:HGNC:18010]
ENSG00000196517	692	703	895	566	636	663	507	490	575	479	693	671	protein_coding	1	43991500	44031467	SLC6A9	solute carrier family 6 (neurotransmitter transporter, glycine), member 9 [Source:HGNC Symbol;Acc:HGNC:11056]
ENSG00000196550	104	99	155	87	93	111	108	101	140	76	94	88	protein_coding	1	206186179	206204414	FAM72A	family with sequence similarity 72, member A [Source:HGNC Symbol;Acc:HGNC:24044]
ENSG00000196581	1	0	0	0	0	0	0	0	0	0	0	0	protein_coding	1	4654732	4792534	AJAP1	adherens junctions associated protein 1 [Source:HGNC Symbol;Acc:HGNC:30801]
ENSG00000196660	8	12	15	23	19	37	11	9	12	14	9	13	protein_coding	1	219685427	219958647	SLC30A10	solute carrier family 30, member 10 [Source:HGNC Symbol;Acc:HGNC:25355]
ENSG00000196734	0	0	2	0	0	0	0	0	0	0	0	0	protein_coding	1	152737518	152813109	LCE1B	late cornified envelope 1B [Source:HGNC Symbol;Acc:HGNC:16611]
ENSG00000196754	4	3	6	3	2	4	1	1	2	1	0	0	protein_coding	1	153561108	153567890	S100A2	S100 calcium binding protein A2 [Source:HGNC Symbol;Acc:HGNC:10492]
ENSG00000196878	11	8	9	8	9	10	11	13	15	7	13	5	protein_coding	1	209614870	209652466	LAMB3	laminin, beta 3 [Source:HGNC Symbol;Acc:HGNC:6490]
ENSG00000196890	55	55	74	33	35	42	45	35	49	9	17	26	protein_coding	1	228458107	228460470	HIST3H2BB	histone cluster 3, H2bb [Source:HGNC Symbol;Acc:HGNC:20514]
ENSG00000197056	720	764	908	754	681	965	629	573	725	540	694	633	protein_coding	1	35059786	35115859	ZMYM1	zinc finger, MYM-type 1 [Source:HGNC Symbol;Acc:HGNC:26253]
ENSG00000197106	10	7	12	6	6	9	5	7	12	2	3	1	protein_coding	1	110150486	110202202	SLC6A17	solute carrier family 6 (neutral amino acid transporter), member 17 [Source:HGNC Symbol;Acc:HGNC:31399]
ENSG00000197147	1467	1578	1941	1253	1088	1456	1380	1290	1637	891	1175	1128	protein_coding	1	89524836	89597864	LRRC8B	leucine rich repeat containing 8 family, member B [Source:HGNC Symbol;Acc:HGNC:30692]
ENSG00000197241	0	1	0	0	0	0	0	0	0	0	0	0	protein_coding	1	9003300	9026345	SLC2A7	solute carrier family 2 (facilitated glucose transporter), member 7 [Source:HGNC Symbol;Acc:HGNC:13445]
ENSG00000197245	0	1	1	0	0	0	0	0	0	0	0	1	protein_coding	1	26159020	26162628	FAM110D	family with sequence similarity 110, member D [Source:HGNC Symbol;Acc:HGNC:25860]
ENSG00000197312	2450	2450	3115	1970	1732	2316	2051	1912	2417	1241	1629	1676	protein_coding	1	15617500	15669044	DDI2	DNA-damage inducible 1 homolog 2 (S. cerevisiae) [Source:HGNC Symbol;Acc:HGNC:24578]
ENSG00000197323	1980	2022	2675	1813	1493	2054	1737	1729	2065	1138	1545	1518	protein_coding	1	114392777	114511160	TRIM33	tripartite motif containing 33 [Source:HGNC Symbol;Acc:HGNC:16290]
ENSG00000197429	700	704	876	841	780	999	615	535	712	510	712	638	protein_coding	1	45694324	45750650	IPP	intracisternal A particle-promoted polypeptide [Source:HGNC Symbol;Acc:HGNC:6108]
ENSG00000197472	112	104	146	98	83	113	127	101	99	56	86	78	protein_coding	1	246945547	247008093	ZNF695	zinc finger protein 695 [Source:HGNC Symbol;Acc:HGNC:30954]
ENSG00000197520	6	6	7	21	19	26	3	6	5	6	11	14	protein_coding	1	222737207	222750805	FAM177B	family with sequence similarity 177, member B [Source:HGNC Symbol;Acc:HGNC:34395]
ENSG00000197530	552	570	733	866	803	816	439	347	468	363	539	588	protein_coding	1	1615415	1630610	MIB2	mindbomb E3 ubiquitin protein ligase 2 [Source:HGNC Symbol;Acc:HGNC:30577]
ENSG00000197568	103	97	152	108	109	125	64	78	111	52	100	75	protein_coding	1	70354805	70385339	HHLA3	HERV-H LTR-associating 3 [Source:HGNC Symbol;Acc:HGNC:4906]
ENSG00000197587	185	157	211	299	296	316	131	122	154	152	255	200	protein_coding	1	46506996	46514226	DMBX1	diencephalon/mesencephalon homeobox 1 [Source:HGNC Symbol;Acc:HGNC:19026]
ENSG00000197622	3092	3146	3870	2709	2486	2959	2618	2447	3158	1528	2177	2067	protein_coding	1	151050971	151070325	CDC42SE1	CDC42 small effector 1 [Source:HGNC Symbol;Acc:HGNC:17719]
ENSG00000197747	9	14	17	18	28	11	3	6	13	11	17	15	protein_coding	1	151982915	151994390	S100A10	S100 calcium binding protein A10 [Source:HGNC Symbol;Acc:HGNC:10487]
ENSG00000197769	0	0	1	0	1	0	0	0	0	0	0	0	protein_coding	1	241995490	241999073	MAP1LC3C	microtubule-associated protein 1 light chain 3 gamma [Source:HGNC Symbol;Acc:HGNC:13353]
ENSG00000197780	866	911	1107	793	792	944	790	688	845	450	616	572	protein_coding	1	109062486	109076002	TAF13	TAF13 RNA polymerase II, TATA box binding protein (TBP)-associated factor, 18kDa [Source:HGNC Symbol;Acc:HGNC:11546]
ENSG00000197785	1407	1410	1784	1126	1168	1255	1258	1121	1411	688	992	909	protein_coding	1	1512151	1534687	ATAD3A	ATPase family, AAA domain containing 3A [Source:HGNC Symbol;Acc:HGNC:25567]
ENSG00000197852	138	128	207	374	369	450	188	169	201	235	308	319	protein_coding	1	111680630	111755824	FAM212B	family with sequence similarity 212, member B [Source:HGNC Symbol;Acc:HGNC:28045]
ENSG00000197880	0	0	0	0	0	0	0	1	0	0	1	0	protein_coding	1	23581495	23640568	MDS2	myelodysplastic syndrome 2 translocation associated [Source:HGNC Symbol;Acc:HGNC:29633]
ENSG00000197959	77	85	94	152	169	195	64	73	72	102	134	131	protein_coding	1	171841498	172418466	DNM3	dynamin 3 [Source:HGNC Symbol;Acc:HGNC:29125]
ENSG00000197965	4290	4432	5283	3810	3466	4168	3656	3506	4470	2137	2780	2698	protein_coding	1	167721192	167791919	MPZL1	myelin protein zero-like 1 [Source:HGNC Symbol;Acc:HGNC:7226]
ENSG00000197982	619	636	798	550	572	657	476	411	604	292	363	387	protein_coding	1	37806979	37809454	C1orf122	chromosome 1 open reading frame 122 [Source:HGNC Symbol;Acc:HGNC:24789]
ENSG00000197989	278	293	298	391	356	417	189	154	224	148	218	178	antisense	1	28578538	28582983	SNHG12	small nucleolar RNA host gene 12 (non-protein coding) [Source:HGNC Symbol;Acc:HGNC:30062]
ENSG00000198049	0	0	0	0	0	0	0	0	0	0	1	0	protein_coding	1	206109692	206117699	AVPR1B	arginine vasopressin receptor 1B [Source:HGNC Symbol;Acc:HGNC:896]
ENSG00000198160	1216	1251	1504	1749	1498	1878	1129	949	1246	989	1396	1311	protein_coding	1	66924895	66988619	MIER1	mesoderm induction early response 1, transcriptional regulator [Source:HGNC Symbol;Acc:HGNC:29657]
ENSG00000198162	1705	1801	2206	2231	1994	2600	1572	1399	1881	1427	1870	1849	protein_coding	1	117367449	117528872	MAN1A2	mannosidase, alpha, class 1A, member 2 [Source:HGNC Symbol;Acc:HGNC:6822]
ENSG00000198198	1356	1501	1897	2057	1942	2173	1056	1080	1199	1004	1537	1489	protein_coding	1	43389882	43452650	SZT2	seizure threshold 2 homolog (mouse) [Source:HGNC Symbol;Acc:HGNC:29040]
ENSG00000198216	0	0	3	1	1	1	0	0	1	1	0	1	protein_coding	1	181413102	181808084	CACNA1E	calcium channel, voltage-dependent, R type, alpha 1E subunit [Source:HGNC Symbol;Acc:HGNC:1392]
ENSG00000198358	1	1	0	0	2	1	0	0	2	1	1	2	antisense	1	160932465	160949922	RP11-544M22.1
ENSG00000198400	2	1	2	1	3	2	0	1	4	1	2	2	protein_coding	1	156815640	156881850	NTRK1	neurotrophic tyrosine kinase, receptor, type 1 [Source:HGNC Symbol;Acc:HGNC:8031]
ENSG00000198468	50	53	82	63	51	70	37	37	57	18	34	51	lincRNA	1	212852108	212858088	FLVCR1-AS1	FLVCR1 antisense RNA 1 (head to head) [Source:HGNC Symbol;Acc:HGNC:39077]
ENSG00000198483	1	2	0	1	4	1	0	1	0	0	0	0	protein_coding	1	145866560	145885866	ANKRD35	ankyrin repeat domain 35 [Source:HGNC Symbol;Acc:HGNC:26323]
ENSG00000198492	2973	2994	3750	2859	2695	3441	2691	2360	3140	1715	2453	2338	protein_coding	1	28736621	28769775	YTHDF2	YTH domain family, member 2 [Source:HGNC Symbol;Acc:HGNC:31675]
ENSG00000198520	4	3	7	19	17	13	7	1	5	4	10	10	protein_coding	1	44674692	44725591	C1orf228	chromosome 1 open reading frame 228 [Source:HGNC Symbol;Acc:HGNC:34345]
ENSG00000198625	1952	2120	2448	1791	1639	1718	1489	1450	1901	1117	1627	1514	protein_coding	1	204516379	204558120	MDM4	MDM4, p53 regulator [Source:HGNC Symbol;Acc:HGNC:6974]
ENSG00000198626	355	325	419	314	271	394	271	233	332	215	275	274	protein_coding	1	237042205	237833988	RYR2	ryanodine receptor 2 (cardiac) [Source:HGNC Symbol;Acc:HGNC:10484]
ENSG00000198658	1	1	1	1	1	0	0	0	1	0	0	0	unprocessed_pseudogene	1	148146395	148149566	ABHD17AP1	abhydrolase domain containing 17A pseudogene 1 [Source:HGNC Symbol;Acc:HGNC:28394]
ENSG00000198691	5	2	3	2	1	4	2	2	4	0	4	1	protein_coding	1	93992835	94121132	ABCA4	ATP-binding cassette, sub-family A (ABC1), member 4 [Source:HGNC Symbol;Acc:HGNC:34]
ENSG00000198700	4831	5017	6127	4581	4394	5408	4226	3915	4856	3038	4060	3851	protein_coding	1	201829141	201884294	IPO9	importin 9 [Source:HGNC Symbol;Acc:HGNC:19425]
ENSG00000198711	4	9	3	3	3	3	2	2	4	2	3	2	antisense	1	54236440	54239063	SSBP3-AS1	SSBP3 antisense RNA 1 [Source:HGNC Symbol;Acc:HGNC:32328]
ENSG00000198715	1033	1040	1327	693	654	796	824	808	984	413	549	490	protein_coding	1	156290089	156295689	C1orf85	chromosome 1 open reading frame 85 [Source:HGNC Symbol;Acc:HGNC:29436]
ENSG00000198734	194	200	256	9	8	12	151	141	203	5	6	5	protein_coding	1	169514166	169586588	F5	coagulation factor V (proaccelerin, labile factor) [Source:HGNC Symbol;Acc:HGNC:3542]
ENSG00000198744	15	11	23	20	39	34	14	16	19	12	16	15	unprocessed_pseudogene	1	634376	634922	RP5-857K21.11
ENSG00000198746	256	250	317	272	242	314	187	204	251	135	179	179	protein_coding	1	26890488	26900466	GPATCH3	G patch domain containing 3 [Source:HGNC Symbol;Acc:HGNC:25720]
ENSG00000198754	0	0	0	1	1	3	0	2	0	3	4	2	protein_coding	1	39769523	39771348	OXCT2	3-oxoacid CoA transferase 2 [Source:HGNC Symbol;Acc:HGNC:18606]
ENSG00000198756	46	39	58	61	50	69	47	27	55	35	59	71	protein_coding	1	183929854	184037729	COLGALT2	collagen beta(1-O)galactosyltransferase 2 [Source:HGNC Symbol;Acc:HGNC:16790]
ENSG00000198758	0	0	0	0	0	0	0	0	0	0	1	0	protein_coding	1	109750080	109764027	EPS8L3	EPS8-like 3 [Source:HGNC Symbol;Acc:HGNC:21297]
ENSG00000198765	0	1	0	0	1	1	4	1	1	0	0	1	protein_coding	1	114854803	114995370	SYCP1	synaptonemal complex protein 1 [Source:HGNC Symbol;Acc:HGNC:11487]
ENSG00000198771	5	3	7	1	3	0	4	6	5	1	1	2	protein_coding	1	167630093	167706249	RCSD1	RCSD domain containing 1 [Source:HGNC Symbol;Acc:HGNC:28310]
ENSG00000198793	3523	3681	4640	2364	2143	2733	3149	2905	3610	1537	2074	2021	protein_coding	1	11106535	11262507	MTOR	mechanistic target of rapamycin (serine/threonine kinase) [Source:HGNC Symbol;Acc:HGNC:3942]
ENSG00000198797	0	0	0	0	0	0	1	0	0	0	2	0	protein_coding	1	177171497	177282422	BRINP2	bone morphogenetic protein/retinoic acid inducible neural-specific 2 [Source:HGNC Symbol;Acc:HGNC:13746]
ENSG00000198799	682	717	881	933	909	1126	589	502	663	618	824	778	protein_coding	1	113073209	113132260	LRIG2	leucine-rich repeats and immunoglobulin-like domains 2 [Source:HGNC Symbol;Acc:HGNC:20889]
ENSG00000198815	1751	1878	2355	1981	1721	2213	1608	1476	1962	1183	1626	1556	protein_coding	1	42176539	42335877	FOXJ3	forkhead box J3 [Source:HGNC Symbol;Acc:HGNC:29178]
ENSG00000198821	0	0	0	0	0	2	0	0	0	0	0	0	protein_coding	1	167430640	167518610	CD247	CD247 molecule [Source:HGNC Symbol;Acc:HGNC:1677]
ENSG00000198830	5493	5502	6636	4838	4635	6093	4645	3829	5279	2928	3853	3594	protein_coding	1	26472450	26475972	HMGN2	high mobility group nucleosomal binding domain 2 [Source:HGNC Symbol;Acc:HGNC:4986]
ENSG00000198835	4	1	4	6	4	6	1	1	1	3	3	1	protein_coding	1	228149852	228159826	GJC2	gap junction protein, gamma 2, 47kDa [Source:HGNC Symbol;Acc:HGNC:17494]
ENSG00000198837	1091	1121	1494	1440	1487	1534	973	875	1155	867	1278	1211	protein_coding	1	153929501	153946696	DENND4B	DENN/MADD domain containing 4B [Source:HGNC Symbol;Acc:HGNC:29044]
ENSG00000198841	259	280	357	215	182	240	225	190	276	149	173	141	protein_coding	1	52032103	52033816	KTI12	KTI12 homolog, chromatin associated (S. cerevisiae) [Source:HGNC Symbol;Acc:HGNC:25160]
ENSG00000198842	195	194	285	70	44	74	164	141	195	30	45	38	protein_coding	1	167094045	167129165	DUSP27	dual specificity phosphatase 27 (putative) [Source:HGNC Symbol;Acc:HGNC:25034]
ENSG00000198860	1509	1566	1917	1029	878	1160	1299	1176	1593	692	885	914	protein_coding	1	184051677	184074212	TSEN15	TSEN15 tRNA splicing endonuclease subunit [Source:HGNC Symbol;Acc:HGNC:16791]
ENSG00000198890	2171	2144	2903	1815	1608	1971	1831	1634	2195	1021	1490	1423	protein_coding	1	107056679	107059294	PRMT6	protein arginine methyltransferase 6 [Source:HGNC Symbol;Acc:HGNC:18241]
ENSG00000198892	178	194	289	363	395	449	137	152	200	233	322	303	protein_coding	1	201888680	201892306	SHISA4	shisa family member 4 [Source:HGNC Symbol;Acc:HGNC:27139]
ENSG00000198912	607	577	787	445	461	511	540	484	662	306	417	339	protein_coding	1	3889125	3900293	C1orf174	chromosome 1 open reading frame 174 [Source:HGNC Symbol;Acc:HGNC:27915]
ENSG00000198929	32	37	64	42	47	35	30	34	54	30	50	45	protein_coding	1	162069774	162370475	NOS1AP	nitric oxide synthase 1 (neuronal) adaptor protein [Source:HGNC Symbol;Acc:HGNC:16859]
ENSG00000198952	3675	3855	4678	3250	2965	3584	2865	2606	3423	1776	2439	2323	protein_coding	1	156249224	156282825	SMG5	SMG5 nonsense mediated mRNA decay factor [Source:HGNC Symbol;Acc:HGNC:24644]
ENSG00000198974	0	0	0	0	0	1	0	0	0	0	0	0	miRNA	1	40754351	40754463	MIR30E	microRNA 30e [Source:HGNC Symbol;Acc:HGNC:31629]
ENSG00000198976	1	0	0	0	0	0	0	0	0	0	0	0	miRNA	1	1169005	1169087	MIR429	microRNA 429 [Source:HGNC Symbol;Acc:HGNC:13784]
ENSG00000199471	1	0	0	0	3	2	0	1	0	1	1	0	misc_RNA	1	202914880	202914980	Y_RNA	Y RNA [Source:RFAM;Acc:RF00019]
ENSG00000199879	0	0	0	0	0	0	0	0	0	0	0	1	snRNA	1	148263476	148263632	RNU1-120P	RNA, U1 small nuclear 120, pseudogene [Source:HGNC Symbol;Acc:HGNC:48462]
ENSG00000200087	16	19	11	12	11	6	5	9	13	3	12	9	snoRNA	1	28508559	28508762	SNORA73B	small nucleolar RNA, H/ACA box 73B [Source:HGNC Symbol;Acc:HGNC:10116]
ENSG00000200403	0	0	0	0	0	0	0	0	1	0	0	0	snRNA	1	19305076	19305182	RNU6-1099P	RNA, U6 small nuclear 1099, pseudogene [Source:HGNC Symbol;Acc:HGNC:48062]
ENSG00000200575	0	0	0	0	0	2	0	0	0	0	0	0	snRNA	1	61816419	61816522	RNU6-414P	RNA, U6 small nuclear 414, pseudogene [Source:HGNC Symbol;Acc:HGNC:47377]
ENSG00000200674	0	2	0	2	1	3	0	0	1	1	1	1	misc_RNA	1	173791548	173791887	RN7SKP160	RNA, 7SK small nuclear pseudogene 160 [Source:HGNC Symbol;Acc:HGNC:45884]
ENSG00000200755	0	0	1	0	0	0	0	0	0	0	0	0	rRNA	1	173969318	173969436	RNA5SP68	RNA, 5S ribosomal pseudogene 68 [Source:HGNC Symbol;Acc:HGNC:42845]
ENSG00000200913	0	0	1	0	0	1	0	0	0	0	0	0	snoRNA	1	44776490	44776593	SNORD46	small nucleolar RNA, C/D box 46 [Source:HGNC Symbol;Acc:HGNC:10186]
ENSG00000200942	0	0	0	0	1	0	0	0	0	0	0	0	snRNA	1	201733406	201733505	RNU6-501P	RNA, U6 small nuclear 501, pseudogene [Source:HGNC Symbol;Acc:HGNC:47464]
ENSG00000201457	0	2	2	1	1	2	0	2	2	2	1	0	snoRNA	1	39567374	39567508	SNORA55	small nucleolar RNA, H/ACA box 55 [Source:HGNC Symbol;Acc:HGNC:32649]
ENSG00000201542	0	0	0	0	0	2	0	0	0	0	0	0	snoRNA	1	35310274	35310425	SNORA62	Small nucleolar RNA SNORA62/SNORA6 family [Source:RFAM;Acc:RF00091]
ENSG00000201544	0	0	0	1	0	0	0	0	0	0	0	0	snoRNA	1	212352816	212352950	SNORA16B	small nucleolar RNA, H/ACA box 16B [Source:HGNC Symbol;Acc:HGNC:32606]
ENSG00000201558	1	0	0	1	0	0	1	0	0	0	0	0	snRNA	1	146052081	146052244	RNVU1-6	RNA, variant U1 small nuclear 6 [Source:HGNC Symbol;Acc:HGNC:48314]
ENSG00000201944	1	1	4	1	1	0	0	1	0	1	2	3	snoRNA	1	205731221	205731352	SNORA72	Small nucleolar RNA SNORA72 [Source:RFAM;Acc:RF00139]
ENSG00000202078	0	1	1	1	1	2	0	0	0	0	0	1	misc_RNA	1	160326104	160326216	Y_RNA	Y RNA [Source:RFAM;Acc:RF00019]
ENSG00000202222	0	1	0	0	0	0	1	0	0	0	1	0	misc_RNA	1	39881566	39881678	Y_RNA	Y RNA [Source:RFAM;Acc:RF00019]
ENSG00000202408	0	0	0	0	1	1	0	0	1	0	1	1	snRNA	1	148334612	148334767	RNU1-122P	RNA, U1 small nuclear 122, pseudogene [Source:HGNC Symbol;Acc:HGNC:48464]
ENSG00000202415	3	2	2	1	5	5	3	4	4	0	2	8	misc_RNA	1	9947318	9947636	RN7SKP269	RNA, 7SK small nuclear pseudogene 269 [Source:HGNC Symbol;Acc:HGNC:45993]
ENSG00000203288	18	30	19	30	25	27	14	21	15	15	25	27	antisense	1	151790804	151794402	RP11-98D18.9
ENSG00000203307	0	0	0	1	0	0	0	1	0	0	1	0	antisense	1	166081183	166087483	RP11-375H19.2
ENSG00000203325	0	0	0	0	0	0	0	1	0	0	0	0	antisense	1	32052291	32073474	RP11-277A4.4
ENSG00000203356	1	1	1	0	0	0	1	1	1	0	0	0	lincRNA	1	51195095	51235096	RP11-296A18.3
ENSG00000203394	0	0	1	2	0	1	0	0	0	0	0	0	antisense	1	20742987	20744292	RP5-930J4.4
ENSG00000203469	0	1	0	0	0	0	0	0	0	0	0	0	antisense	1	10458555	10459338	RP5-1113E3.3
ENSG00000203589	1	0	3	4	1	2	0	0	1	0	0	1	processed_pseudogene	1	23705801	23706934	RP5-886K2.1
ENSG00000203601	0	0	2	0	0	0	0	0	0	1	0	0	antisense	1	168903905	169087005	LINC00970	long intergenic non-protein coding RNA 970 [Source:HGNC Symbol;Acc:HGNC:48730]
ENSG00000203605	0	0	0	0	1	0	0	0	0	1	0	0	lincRNA	1	63139250	63163153	RP11-335E6.2
ENSG00000203664	0	0	0	0	0	0	0	1	0	0	0	0	transcribed_unprocessed_pseudogene	1	247491068	247492147	OR2W5	olfactory receptor, family 2, subfamily W, member 5 [Source:HGNC Symbol;Acc:HGNC:15424]
ENSG00000203666	62	54	92	79	103	129	49	58	62	50	75	83	protein_coding	1	244969705	245127164	EFCAB2	EF-hand calcium binding domain 2 [Source:HGNC Symbol;Acc:HGNC:28166]
ENSG00000203667	1337	1381	1583	1456	1367	1757	1058	938	1174	855	1115	1070	protein_coding	1	244835322	244845057	COX20	COX20 cytochrome C oxidase assembly factor [Source:HGNC Symbol;Acc:HGNC:26970]
ENSG00000203668	875	871	1066	938	754	1024	847	833	986	712	968	869	protein_coding	1	241628853	241635930	CHML	choroideremia-like (Rab escort protein 2) [Source:HGNC Symbol;Acc:HGNC:1941]
ENSG00000203684	1	2	5	2	5	7	0	2	3	1	2	3	lincRNA	1	228164086	228165512	IBA57-AS1	IBA57 antisense RNA 1 (head to head) [Source:HGNC Symbol;Acc:HGNC:32062]
ENSG00000203685	51	35	59	118	133	154	52	28	44	65	93	96	protein_coding	1	226548800	226609214	C1orf95	chromosome 1 open reading frame 95 [Source:HGNC Symbol;Acc:HGNC:30491]
ENSG00000203697	0	0	0	0	2	0	0	1	0	0	1	0	protein_coding	1	223538007	223665734	CAPN8	calpain 8 [Source:HGNC Symbol;Acc:HGNC:1485]
ENSG00000203705	471	498	624	434	390	519	463	389	530	274	396	353	protein_coding	1	212791828	212816626	TATDN3	TatD DNase domain containing 3 [Source:HGNC Symbol;Acc:HGNC:27010]
ENSG00000203709	125	191	200	306	360	327	114	110	103	132	226	223	lincRNA	1	207801518	207869150	C1orf132	chromosome 1 open reading frame 132 [Source:HGNC Symbol;Acc:HGNC:32018]
ENSG00000203721	1	0	0	0	0	0	0	0	0	0	0	0	lincRNA	1	200342544	200374354	LINC00862	long intergenic non-protein coding RNA 862 [Source:HGNC Symbol;Acc:HGNC:21901]
ENSG00000203724	58	39	60	104	97	110	53	37	44	40	54	64	protein_coding	1	197902647	197907367	C1orf53	chromosome 1 open reading frame 53 [Source:HGNC Symbol;Acc:HGNC:30003]
ENSG00000203729	0	0	0	0	1	0	1	1	0	0	0	0	lincRNA	1	182407621	182414815	LINC00272	long intergenic non-protein coding RNA 272 [Source:HGNC Symbol;Acc:HGNC:26898]
ENSG00000203737	0	0	2	0	1	1	0	0	1	1	1	0	protein_coding	1	174448111	174449198	GPR52	G protein-coupled receptor 52 [Source:HGNC Symbol;Acc:HGNC:4508]
ENSG00000203739	42	54	54	41	38	44	33	29	54	21	24	29	antisense	1	173417793	173461362	RP11-296O14.3
ENSG00000203761	52	57	73	38	39	48	35	40	45	24	42	37	unprocessed_pseudogene	1	155745829	155750137	MSTO2P	misato family member 2, pseudogene [Source:HGNC Symbol;Acc:HGNC:26329]
ENSG00000203786	0	1	1	0	0	0	0	1	2	0	0	0	protein_coding	1	152759561	152762052	KPRP	keratinocyte proline-rich protein [Source:HGNC Symbol;Acc:HGNC:31823]
ENSG00000203804	0	4	1	5	7	8	3	3	2	3	7	9	processed_transcript	1	150560202	150574552	ADAMTSL4-AS1	ADAMTSL4 antisense RNA 1 [Source:HGNC Symbol;Acc:HGNC:32041]
ENSG00000203814	84	81	110	104	90	135	48	52	68	48	40	56	protein_coding	1	149782689	149812373	HIST2H2BF	histone cluster 2, H2bf [Source:HGNC Symbol;Acc:HGNC:24700]
ENSG00000203819	16	17	27	18	14	8	14	14	15	9	6	9	processed_pseudogene	1	149850193	149850772	HIST2H2BC	histone cluster 2, H2bc (pseudogene) [Source:HGNC Symbol;Acc:HGNC:20516]
ENSG00000203857	10	2	9	5	8	9	1	3	3	4	7	0	protein_coding	1	119507198	119515054	HSD3B1	hydroxy-delta-5-steroid dehydrogenase, 3 beta- and steroid delta-isomerase 1 [Source:HGNC Symbol;Acc:HGNC:5217]
ENSG00000203865	56	60	72	98	71	97	59	46	52	59	80	66	processed_transcript	1	116392247	116418622	ATP1A1-AS1	ATP1A1 antisense RNA 1 [Source:HGNC Symbol;Acc:HGNC:28262]
ENSG00000203914	1	0	1	1	0	1	0	1	0	0	0	0	processed_pseudogene	1	91642516	91644082	HSP90B3P	heat shock protein 90kDa beta (Grp94), member 3, pseudogene [Source:HGNC Symbol;Acc:HGNC:12100]
ENSG00000203943	215	230	284	283	293	347	238	232	290	258	339	279	protein_coding	1	84298366	84389957	SAMD13	sterile alpha motif domain containing 13 [Source:HGNC Symbol;Acc:HGNC:24582]
ENSG00000203965	196	209	295	273	227	286	210	147	241	184	246	232	protein_coding	1	63523372	63572693	EFCAB7	EF-hand calcium binding domain 7 [Source:HGNC Symbol;Acc:HGNC:29379]
ENSG00000203985	0	0	2	1	0	1	0	0	2	4	6	2	protein_coding	1	54007299	54018186	LDLRAD1	low density lipoprotein receptor class A domain containing 1 [Source:HGNC Symbol;Acc:HGNC:32069]
ENSG00000203995	15	12	22	25	24	30	14	12	12	19	26	28	protein_coding	1	52842511	52894998	ZYG11A	zyg-11 family member A, cell cycle regulator [Source:HGNC Symbol;Acc:HGNC:32058]
ENSG00000204060	19	23	30	30	34	41	24	20	16	23	35	41	protein_coding	1	41361922	41383590	FOXO6	forkhead box O6 [Source:HGNC Symbol;Acc:HGNC:24814]
ENSG00000204084	479	442	608	547	420	541	432	356	514	340	438	365	protein_coding	1	37860697	37947057	INPP5B	inositol polyphosphate-5-phosphatase, 75kDa [Source:HGNC Symbol;Acc:HGNC:6077]
ENSG00000204138	1193	1175	1575	1293	1290	1462	1050	1036	1272	866	1244	1138	protein_coding	1	28369603	28500369	PHACTR4	phosphatase and actin regulator 4 [Source:HGNC Symbol;Acc:HGNC:25793]
ENSG00000204160	476	526	644	417	449	473	403	351	491	288	371	368	protein_coding	1	26826710	26857602	ZDHHC18	zinc finger, DHHC-type containing 18 [Source:HGNC Symbol;Acc:HGNC:20712]
ENSG00000204178	425	436	537	495	439	548	398	344	492	257	356	352	protein_coding	1	25430858	25500209	TMEM57	transmembrane protein 57 [Source:HGNC Symbol;Acc:HGNC:25572]
ENSG00000204219	434	457	567	546	522	617	367	360	486	307	407	388	protein_coding	1	23381061	23424740	TCEA3	transcription elongation factor A (SII), 3 [Source:HGNC Symbol;Acc:HGNC:11615]
ENSG00000204478	0	0	1	0	0	0	0	0	0	0	0	1	protein_coding	1	13410450	13421328	PRAMEF20	PRAME family member 20 [Source:HGNC Symbol;Acc:HGNC:25224]
ENSG00000204481	0	0	0	0	0	1	0	0	0	0	0	0	protein_coding	1	13342034	13347134	PRAMEF14	PRAME family member 14 [Source:HGNC Symbol;Acc:HGNC:13576]
ENSG00000204624	4	5	5	1	1	0	4	2	1	3	3	5	protein_coding	1	11479166	11537584	PTCHD2	patched domain containing 2 [Source:HGNC Symbol;Acc:HGNC:29251]
ENSG00000204859	464	475	634	497	480	527	351	291	422	252	343	346	protein_coding	1	6580001	6589280	ZBTB48	zinc finger and BTB domain containing 48 [Source:HGNC Symbol;Acc:HGNC:4930]
ENSG00000205090	6	8	16	18	12	12	8	3	6	5	10	12	protein_coding	1	1535174	1540453	TMEM240	transmembrane protein 240 [Source:HGNC Symbol;Acc:HGNC:25186]
ENSG00000205231	0	0	1	0	0	0	0	0	0	0	0	1	antisense	1	1173056	1179555	TTLL10-AS1	TTLL10 antisense RNA 1 [Source:HGNC Symbol;Acc:HGNC:41159]
ENSG00000206635	0	1	0	2	1	1	0	1	0	0	1	1	snRNA	1	151629324	151629430	RNU6-1062P	RNA, U6 small nuclear 1062, pseudogene [Source:HGNC Symbol;Acc:HGNC:48025]
ENSG00000206878	0	1	0	0	1	0	0	0	1	0	0	0	snoRNA	1	228652436	228652560	SNORA51	Small nucleolar RNA SNORA51 [Source:RFAM;Acc:RF00432]
ENSG00000206888	0	0	0	0	0	1	0	0	0	1	0	0	snRNA	1	27325219	27325325	RNU6-48P	RNA, U6 small nuclear 48, pseudogene [Source:HGNC Symbol;Acc:HGNC:34292]
ENSG00000206921	1	0	0	0	0	0	0	0	2	0	0	0	snRNA	1	161401289	161401395	RNU6-481P	RNA, U6 small nuclear 481, pseudogene [Source:HGNC Symbol;Acc:HGNC:47444]
ENSG00000207022	0	0	0	0	0	1	0	0	0	0	0	0	snoRNA	1	92846059	92846182	SNORA51	Small nucleolar RNA SNORA51 [Source:RFAM;Acc:RF00432]
ENSG00000207082	0	0	0	1	0	0	0	0	0	0	0	0	snRNA	1	164639565	164639671	RNU6-171P	RNA, U6 small nuclear 171, pseudogene [Source:HGNC Symbol;Acc:HGNC:47134]
ENSG00000207139	0	0	0	1	0	0	0	0	0	0	0	0	misc_RNA	1	197685640	197685740	Y_RNA	Y RNA [Source:RFAM;Acc:RF00019]
ENSG00000207181	0	1	1	0	1	0	1	0	1	1	0	2	snoRNA	1	235127803	235127937	SNORA14B	small nucleolar RNA, H/ACA box 14B [Source:HGNC Symbol;Acc:HGNC:32603]
ENSG00000207205	0	0	1	0	1	1	0	0	0	0	0	0	snRNA	1	144412576	144412740	RNVU1-15	RNA, variant U1 small nuclear 15 [Source:HGNC Symbol;Acc:HGNC:48320]
ENSG00000207234	0	0	0	2	0	0	0	0	0	0	1	0	snRNA	1	88816779	88816885	RNU6-125P	RNA, U6 small nuclear 125, pseudogene [Source:HGNC Symbol;Acc:HGNC:47088]
ENSG00000207326	0	0	0	0	1	0	0	0	1	0	0	0	misc_RNA	1	246426006	246426119	Y_RNA	Y RNA [Source:RFAM;Acc:RF00019]
ENSG00000207340	0	1	0	0	0	2	0	0	0	0	0	0	snRNA	1	148362370	148362533	RNVU1-10	RNA, variant U1 small nuclear 10 [Source:HGNC Symbol;Acc:HGNC:48316]
ENSG00000207475	0	0	0	1	0	3	0	0	0	0	0	1	snoRNA	1	155919909	155920045	SNORA80E	small nucleolar RNA, H/ACA box 80E [Source:HGNC Symbol;Acc:HGNC:32635]
ENSG00000207508	0	0	0	0	1	0	0	0	0	0	0	0	snRNA	1	40177843	40177949	RNU6-1237P	RNA, U6 small nuclear 1237, pseudogene [Source:HGNC Symbol;Acc:HGNC:48200]
ENSG00000207523	4	1	0	1	3	3	0	1	1	0	2	0	snoRNA	1	92840719	92840851	SNORA66	small nucleolar RNA, H/ACA box 66 [Source:HGNC Symbol;Acc:HGNC:10223]
ENSG00000207606	0	0	0	0	0	0	1	0	0	0	1	0	miRNA	1	151545796	151545891	MIR554	microRNA 554 [Source:HGNC Symbol;Acc:HGNC:32810]
ENSG00000207607	0	0	0	0	1	0	0	0	0	0	0	0	miRNA	1	1167846	1167956	MIR200A	microRNA 200a [Source:HGNC Symbol;Acc:HGNC:31578]
ENSG00000207730	0	1	0	1	0	0	0	0	0	2	0	0	miRNA	1	1167092	1167202	MIR200B	microRNA 200b [Source:HGNC Symbol;Acc:HGNC:31579]
ENSG00000207750	0	0	2	0	0	0	1	0	0	1	0	0	miRNA	1	100281241	100281308	MIR553	microRNA 553 [Source:HGNC Symbol;Acc:HGNC:32809]
ENSG00000211451	28	36	60	32	34	46	27	28	30	22	24	21	unitary_pseudogene	1	145919013	145925341	GNRHR2	gonadotropin-releasing hormone (type 2) receptor 2, pseudogene [Source:HGNC Symbol;Acc:HGNC:16341]
ENSG00000211452	4	0	1	26	34	30	1	5	3	30	44	37	protein_coding	1	53891239	53911086	DIO1	deiodinase, iodothyronine, type I [Source:HGNC Symbol;Acc:HGNC:2883]
ENSG00000211454	11	9	15	15	18	19	14	11	15	5	14	12	polymorphic_pseudogene	1	19265982	19274194	AKR7L	aldo-keto reductase family 7-like [Source:HGNC Symbol;Acc:HGNC:24056]
ENSG00000211581	0	1	0	1	0	0	0	0	0	0	0	0	miRNA	1	156936131	156936244	MIR765	microRNA 765 [Source:HGNC Symbol;Acc:HGNC:33141]
ENSG00000212248	0	0	0	1	0	0	0	0	0	0	0	0	snRNA	1	99978939	99979045	RNU6-750P	RNA, U6 small nuclear 750, pseudogene [Source:HGNC Symbol;Acc:HGNC:47713]
ENSG00000212360	0	0	0	0	0	1	0	0	0	0	0	0	snRNA	1	61852499	61852602	RNU6-1177P	RNA, U6 small nuclear 1177, pseudogene [Source:HGNC Symbol;Acc:HGNC:48140]
ENSG00000212385	3	4	4	3	4	6	6	4	3	2	3	4	snRNA	1	116413766	116413869	RNU6-817P	RNA, U6 small nuclear 817, pseudogene [Source:HGNC Symbol;Acc:HGNC:47780]
ENSG00000212541	0	0	1	0	0	0	0	0	0	0	1	0	snRNA	1	37991462	37991569	RNU6-510P	RNA, U6 small nuclear 510, pseudogene [Source:HGNC Symbol;Acc:HGNC:47473]
ENSG00000212670	13	22	28	51	41	59	17	21	30	23	48	47	sense_intronic	1	54104295	54106082	RP11-56P23.1
ENSG00000213033	1	4	4	1	2	1	1	0	8	0	0	3	transcribed_processed_pseudogene	1	220266706	220267917	AURKAPS1	aurora kinase A pseudogene 1 [Source:HGNC Symbol;Acc:HGNC:18611]
ENSG00000213036	1	0	0	0	0	0	0	0	0	0	1	0	processed_pseudogene	1	214482813	214483387	RP11-365D23.4
ENSG00000213047	887	870	1028	2345	2098	2898	787	677	835	1472	1961	1807	protein_coding	1	197504748	197775696	DENND1B	DENN/MADD domain containing 1B [Source:HGNC Symbol;Acc:HGNC:28404]
ENSG00000213051	0	0	0	0	0	1	1	0	0	0	0	0	processed_pseudogene	1	185226808	185227700	RPL5P5	ribosomal protein L5 pseudogene 5 [Source:HGNC Symbol;Acc:HGNC:35564]
ENSG00000213057	4	1	0	2	3	3	1	1	2	0	3	0	lincRNA	1	178542752	178548889	C1orf220	chromosome 1 open reading frame 220 [Source:HGNC Symbol;Acc:HGNC:33805]
ENSG00000213058	0	0	1	2	0	0	1	0	1	0	0	0	processed_pseudogene	1	178411616	178411972	RP4-765C7.2
ENSG00000213060	0	1	1	0	0	2	0	0	0	0	1	0	processed_pseudogene	1	171803517	171803939	RP4-612B18.3
ENSG00000213062	39	40	48	17	13	26	32	38	22	17	20	22	lincRNA	1	169486076	169486986	RP1-206D15.6
ENSG00000213064	4481	4592	5494	4262	3767	4741	3522	3363	4340	2664	3515	3386	protein_coding	1	168225938	168253025	SFT2D2	SFT2 domain containing 2 [Source:HGNC Symbol;Acc:HGNC:25140]
ENSG00000213068	0	0	1	0	1	1	0	0	0	0	1	0	processed_pseudogene	1	167162423	167162837	RP11-277B15.1
ENSG00000213070	0	1	1	0	0	0	0	0	0	0	0	0	processed_pseudogene	1	164356767	164357364	HMGB3P6	high mobility group box 3 pseudogene 6 [Source:HGNC Symbol;Acc:HGNC:39283]
ENSG00000213075	0	0	1	0	0	0	0	0	0	0	0	0	transcribed_processed_pseudogene	1	161683695	161685252	RPL31P11	ribosomal protein L31 pseudogene 11 [Source:HGNC Symbol;Acc:HGNC:35849]
ENSG00000213080	4	5	7	4	1	10	6	3	10	2	5	7	processed_pseudogene	1	160894980	160896076	RP11-312J18.5
ENSG00000213085	40	33	58	32	32	43	19	23	41	11	23	22	protein_coding	1	159872364	159900163	CFAP45	cilia and flagella associated protein 45 [Source:HGNC Symbol;Acc:HGNC:17229]
ENSG00000213171	5	6	6	6	7	11	7	5	9	7	4	7	protein_coding	1	151800264	151806154	LINGO4	leucine rich repeat and Ig domain containing 4 [Source:HGNC Symbol;Acc:HGNC:31814]
ENSG00000213190	165	193	248	149	122	179	137	144	204	86	110	116	protein_coding	1	151057758	151068497	MLLT11	myeloid/lymphoid or mixed-lineage leukemia (trithorax homolog, Drosophila); translocated to, 11 [Source:HGNC Symbol;Acc:HGNC:16997]
ENSG00000213244	0	0	0	0	0	0	1	1	0	0	0	0	unprocessed_pseudogene	1	121118195	121118610	HIST2H3DP1	histone cluster 2, H3d pseudogene 1 [Source:HGNC Symbol;Acc:HGNC:43797]
ENSG00000213262	1	0	0	0	0	0	0	0	0	0	0	0	processed_pseudogene	1	117640812	117641639	AL365331.2
ENSG00000213281	2603	2608	3333	2405	2171	2971	2461	2187	2837	1563	1995	1999	protein_coding	1	114704469	114716894	NRAS	neuroblastoma RAS viral (v-ras) oncogene homolog [Source:HGNC Symbol;Acc:HGNC:7989]
ENSG00000213366	1	4	5	2	3	9	2	5	6	5	3	5	protein_coding	1	109668022	109709551	GSTM2	glutathione S-transferase mu 2 (muscle) [Source:HGNC Symbol;Acc:HGNC:4634]
ENSG00000213478	0	0	0	2	0	1	0	0	1	0	0	0	processed_pseudogene	1	51157788	51158471	CFL1P2	cofilin 1 (non-muscle) pseudogene 2 [Source:HGNC Symbol;Acc:HGNC:1878]
ENSG00000213516	900	872	1127	698	588	871	751	705	947	422	548	571	protein_coding	1	88979456	88992960	RBMXL1	RNA binding motif protein, X-linked-like 1 [Source:HGNC Symbol;Acc:HGNC:25073]
ENSG00000213540	0	0	3	1	0	1	2	1	1	0	0	2	processed_pseudogene	1	84085741	84086233	RP11-486G15.1
ENSG00000213559	0	0	0	1	0	0	1	0	0	0	0	0	processed_pseudogene	1	80451083	80452004	HNRNPA1P64	heterogeneous nuclear ribonucleoprotein A1 pseudogene 64 [Source:HGNC Symbol;Acc:HGNC:48794]
ENSG00000213579	0	1	1	0	1	2	2	2	1	0	1	0	processed_pseudogene	1	75582099	75582555	RP4-595K12.1
ENSG00000213625	401	448	534	514	499	656	420	396	499	353	452	417	protein_coding	1	65420587	65436007	LEPROT	leptin receptor overlapping transcript [Source:HGNC Symbol;Acc:HGNC:29477]
ENSG00000213703	0	0	0	1	2	1	0	0	0	1	0	1	processed_pseudogene	1	62641122	62641667	RP5-849H19.2
ENSG00000213735	0	0	0	2	1	0	0	0	0	0	0	1	processed_pseudogene	1	52253621	52254176	ANAPC10P1	anaphase promoting complex subunit 10 pseudogene 1 [Source:HGNC Symbol;Acc:HGNC:33976]
ENSG00000214114	637	687	790	546	508	633	550	500	615	335	441	492	protein_coding	1	38862964	38874495	MYCBP	MYC binding protein [Source:HGNC Symbol;Acc:HGNC:7554]
ENSG00000214144	1	2	0	4	0	0	0	0	1	0	1	0	processed_pseudogene	1	247229940	247231880	RP11-488L18.1
ENSG00000214193	79	95	85	58	64	63	75	64	92	28	50	46	protein_coding	1	36306387	36324886	SH3D21	SH3 domain containing 21 [Source:HGNC Symbol;Acc:HGNC:26236]
ENSG00000214204	1	0	1	0	0	0	0	0	0	1	0	0	processed_pseudogene	1	115856910	115857819	HNRNPA1P43	heterogeneous nuclear ribonucleoprotein A1 pseudogene 43 [Source:HGNC Symbol;Acc:HGNC:48772]
ENSG00000214262	0	0	0	0	0	2	0	1	1	0	0	0	transcribed_processed_pseudogene	1	168245565	168247343	ANKRD36BP1	ankyrin repeat domain 36B pseudogene 1 [Source:HGNC Symbol;Acc:HGNC:28169]
ENSG00000214796	168	188	235	234	196	235	161	129	176	145	189	173	transcribed_unprocessed_pseudogene	1	202851828	202861620	RP11-480I12.5
ENSG00000214812	1	0	0	0	0	0	0	0	0	0	0	0	processed_pseudogene	1	28120449	28121321	RP5-1053E7.3
ENSG00000214837	21	37	30	38	44	43	14	20	24	22	35	32	lincRNA	1	243078857	243101733	LINC01347	long intergenic non-protein coding RNA 1347 [Source:HGNC Symbol;Acc:HGNC:50566]
ENSG00000214973	0	1	0	0	0	0	0	0	0	0	0	0	processed_pseudogene	1	27200834	27201473	CHCHD3P3	coiled-coil-helix-coiled-coil-helix domain containing 3 pseudogene 3 [Source:HGNC Symbol;Acc:HGNC:44699]
ENSG00000215014	41	50	57	31	41	35	28	25	37	22	30	25	lincRNA	1	1574975	1577075	RP5-832C2.5
ENSG00000215381	0	0	0	0	0	0	0	0	1	0	0	0	processed_pseudogene	1	23244765	23245224	RP5-1057J7.1
ENSG00000215520	0	0	1	0	0	0	0	1	0	0	0	0	processed_pseudogene	1	20525989	20526751	RPS4XP4	ribosomal protein S4X pseudogene 4 [Source:HGNC Symbol;Acc:HGNC:36545]
ENSG00000215717	862	838	1163	976	867	1060	736	646	870	587	811	773	protein_coding	1	109089803	109096934	TMEM167B	transmembrane protein 167B [Source:HGNC Symbol;Acc:HGNC:30187]
ENSG00000215784	38	43	69	37	39	41	56	41	65	43	51	48	protein_coding	1	145096000	145112696	FAM72D	family with sequence similarity 72, member D [Source:HGNC Symbol;Acc:HGNC:33593]
ENSG00000215785	2	1	0	0	0	1	0	0	0	0	0	1	processed_pseudogene	1	10990978	10991797	CFL1P6	cofilin 1 (non-muscle) pseudogene 6 [Source:HGNC Symbol;Acc:HGNC:34545]
ENSG00000215788	33	42	56	81	85	83	27	24	32	32	50	53	protein_coding	1	6461151	6466195	TNFRSF25	tumor necrosis factor receptor superfamily, member 25 [Source:HGNC Symbol;Acc:HGNC:11910]
ENSG00000215790	42	48	58	48	36	52	48	27	45	38	33	36	protein_coding	1	1724838	1745992	SLC35E2	solute carrier family 35, member E2 [Source:HGNC Symbol;Acc:HGNC:20863]
ENSG00000215795	0	0	2	3	1	4	1	2	3	2	0	2	processed_pseudogene	1	247183813	247185482	RP11-488L18.3
ENSG00000215808	0	0	0	0	0	0	1	0	0	0	1	0	lincRNA	1	238480384	238486023	LINC01139	long intergenic non-protein coding RNA 1139 [Source:HGNC Symbol;Acc:HGNC:27924]
ENSG00000215817	1	0	0	0	2	1	0	0	1	0	1	0	processed_pseudogene	1	219609627	219612062	ZC3H11B	zinc finger CCCH-type containing 11B pseudogene [Source:HGNC Symbol;Acc:HGNC:25659]
ENSG00000215835	0	3	1	2	1	0	3	0	0	0	0	0	processed_pseudogene	1	166275629	166277597	RP11-9L18.2
ENSG00000215838	1	2	2	3	0	2	1	1	5	0	1	1	transcribed_processed_pseudogene	1	165698750	165709968	RP11-466F5.6
ENSG00000215840	2	5	4	2	2	5	4	2	6	7	1	1	processed_pseudogene	1	161406068	161407082	RP11-122G18.7
ENSG00000215845	454	426	534	788	709	835	384	363	466	401	569	580	protein_coding	1	161037631	161038990	TSTD1	thiosulfate sulfurtransferase (rhodanese)-like domain containing 1 [Source:HGNC Symbol;Acc:HGNC:35410]
ENSG00000215859	1	0	2	2	1	0	0	1	2	0	0	1	lincRNA	1	147993862	148014956	PDZK1P2	PDZ domain containing 1 pseudogene 2 [Source:EntrezGene;Acc:100034743]
ENSG00000215861	0	0	0	6	4	6	0	0	0	4	7	1	unprocessed_pseudogene	1	149197992	149321732	WI2-1896O14.1
ENSG00000215873	0	1	0	0	0	0	0	0	1	0	0	0	processed_pseudogene	1	91328369	91329513	FEN1P1	flap structure-specific endonuclease 1 pseudogene 1 [Source:HGNC Symbol;Acc:HGNC:3651]
ENSG00000215883	391	409	556	444	390	500	367	298	389	259	340	313	protein_coding	1	54172336	54200036	CYB5RL	cytochrome b5 reductase-like [Source:HGNC Symbol;Acc:HGNC:32220]
ENSG00000215893	0	0	0	0	0	0	0	0	0	0	0	1	processed_pseudogene	1	41098638	41099136	RP4-635E8.1
ENSG00000215895	0	1	2	3	2	1	2	2	3	1	3	2	processed_pseudogene	1	38708931	38710890	RP11-334L9.1
ENSG00000215899	1	0	1	0	0	0	0	1	0	0	0	2	processed_pseudogene	1	31487589	31488930	RP11-439L8.2
ENSG00000215908	138	144	180	198	191	183	136	118	141	125	156	131	lincRNA	1	16618262	16644683	CROCCP2	ciliary rootlet coiled-coil, rootletin pseudogene 2 [Source:HGNC Symbol;Acc:HGNC:28170]
ENSG00000215910	0	0	2	0	0	2	1	0	0	1	0	0	protein_coding	1	11761787	11789585	C1orf167	chromosome 1 open reading frame 167 [Source:HGNC Symbol;Acc:HGNC:25262]
ENSG00000215912	4	1	6	10	12	7	3	4	3	2	2	1	protein_coding	1	2635976	2801721	TTC34	tetratricopeptide repeat domain 34 [Source:HGNC Symbol;Acc:HGNC:34297]
ENSG00000215914	0	0	0	0	0	0	0	0	0	0	1	0	unprocessed_pseudogene	1	1699942	1701782	MMP23A	matrix metallopeptidase 23A (pseudogene) [Source:HGNC Symbol;Acc:HGNC:7170]
ENSG00000215915	28	38	40	48	41	39	20	18	21	19	16	35	protein_coding	1	1449689	1470158	ATAD3C	ATPase family, AAA domain containing 3C [Source:HGNC Symbol;Acc:HGNC:32151]
ENSG00000216109	0	0	0	1	0	0	0	0	0	0	0	0	miRNA	1	155236749	155236837	AL713999.1
ENSG00000217801	13	14	17	35	33	52	14	6	15	14	23	20	transcribed_unprocessed_pseudogene	1	1059734	1069355	RP11-465B22.3
ENSG00000217897	0	0	0	0	0	0	0	0	0	0	1	0	processed_pseudogene	1	39304294	39304898	HSPE1P8	heat shock 10kDa protein 1 pseudogene 8 [Source:HGNC Symbol;Acc:HGNC:49326]
ENSG00000218283	1	1	2	1	0	1	2	0	0	0	1	1	processed_pseudogene	1	220253570	220254536	MORF4L1P1	mortality factor 4 like 1 pseudogene 1 [Source:HGNC Symbol;Acc:HGNC:20400]
ENSG00000218510	166	152	180	164	147	171	143	143	152	116	151	122	lincRNA	1	22025188	22031223	LINC00339	long intergenic non-protein coding RNA 339 [Source:HGNC Symbol;Acc:HGNC:25011]
ENSG00000219073	0	0	0	0	0	0	0	0	0	1	0	0	protein_coding	1	21977021	21998642	CELA3B	chymotrypsin-like elastase family, member 3B [Source:HGNC Symbol;Acc:HGNC:15945]
ENSG00000219102	5	4	5	2	3	2	3	1	2	1	0	1	processed_pseudogene	1	53974969	53976031	HNRNPA3P12	heterogeneous nuclear ribonucleoprotein A3 pseudogene 12 [Source:HGNC Symbol;Acc:HGNC:48758]
ENSG00000219133	1	3	2	1	3	1	0	1	3	2	0	1	processed_pseudogene	1	204346776	204347258	RP11-203F10.6
ENSG00000219201	0	0	0	1	0	0	0	0	0	1	0	0	processed_pseudogene	1	77810861	77811781	RP11-181C21.4
ENSG00000219481	1449	1477	1774	1175	1142	1345	1156	996	1387	712	1073	999	protein_coding	1	16562319	16613562	NBPF1	neuroblastoma breakpoint family, member 1 [Source:HGNC Symbol;Acc:HGNC:26088]
ENSG00000220323	3	2	1	3	4	2	1	0	0	0	1	0	processed_pseudogene	1	149843041	149843533	HIST2H2BD	histone cluster 2, H2bd (pseudogene) [Source:HGNC Symbol;Acc:HGNC:20517]
ENSG00000220749	3	2	4	1	3	1	3	0	3	2	4	3	processed_pseudogene	1	212051524	212052006	RPL21P28	ribosomal protein L21 pseudogene 28 [Source:HGNC Symbol;Acc:HGNC:36258]
ENSG00000220785	0	3	2	2	8	7	1	0	4	2	5	6	transcribed_unprocessed_pseudogene	1	32231658	32241620	MTMR9LP	myotubularin related protein 9-like, pseudogene [Source:HGNC Symbol;Acc:HGNC:27920]
ENSG00000221203	0	0	0	0	0	0	0	0	0	1	0	0	miRNA	1	68183518	68183610	MIR1262	microRNA 1262 [Source:HGNC Symbol;Acc:HGNC:35328]
ENSG00000221216	0	1	0	0	0	0	0	0	0	0	1	0	snRNA	1	28481362	28481480	RNU6ATAC27P	RNA, U6atac small nuclear 27, pseudogene [Source:HGNC Symbol;Acc:HGNC:46926]
ENSG00000221406	2	0	0	1	0	0	0	0	1	0	0	0	miRNA	1	224257004	224257141	MIR320B2	microRNA 320b-2 [Source:HGNC Symbol;Acc:HGNC:35256]
ENSG00000221539	0	0	0	0	0	1	2	0	0	1	0	0	snoRNA	1	28578749	28578822	SNORD99	small nucleolar RNA, C/D box 99 [Source:HGNC Symbol;Acc:HGNC:32762]
ENSG00000221571	3	5	4	3	6	5	6	3	2	1	4	3	lincRNA	1	220825620	220826063	RNU6ATAC35P	RNA, U6atac small nuclear 35, pseudogene [Source:HGNC Symbol;Acc:HGNC:46934]
ENSG00000221643	1	1	0	1	0	0	0	1	0	0	0	0	snoRNA	1	203729581	203729705	SNORA77	small nucleolar RNA, H/ACA box 77 [Source:HGNC Symbol;Acc:HGNC:32663]
ENSG00000221978	2142	2264	2836	2890	2945	2945	1800	1469	2147	1334	2306	2117	protein_coding	1	1385711	1399338	CCNL2	cyclin L2 [Source:HGNC Symbol;Acc:HGNC:20570]
ENSG00000221986	2	2	1	0	0	1	2	2	3	0	0	1	protein_coding	1	109292365	109307041	MYBPHL	myosin binding protein H-like [Source:HGNC Symbol;Acc:HGNC:30434]
ENSG00000222009	18	9	8	18	23	24	6	4	8	17	22	30	protein_coding	1	44808482	44815585	BTBD19	BTB (POZ) domain containing 19 [Source:HGNC Symbol;Acc:HGNC:27145]
ENSG00000222046	1	1	1	0	1	1	1	3	1	0	0	1	protein_coding	1	32209094	32216196	DCDC2B	doublecortin domain containing 2B [Source:HGNC Symbol;Acc:HGNC:32576]
ENSG00000222112	4	2	1	9	6	8	5	0	0	2	4	2	misc_RNA	1	33336566	33336864	RN7SKP16	RNA, 7SK small nuclear pseudogene 16 [Source:HGNC Symbol;Acc:HGNC:45740]
ENSG00000222222	0	0	0	0	0	0	0	0	0	1	0	0	snRNA	1	150236967	150237156	RNU2-17P	RNA, U2 small nuclear 17, pseudogene [Source:HGNC Symbol;Acc:HGNC:48510]
ENSG00000222370	0	0	0	0	0	1	0	0	0	1	1	0	snoRNA	1	220200546	220200676	SNORA36B	small nucleolar RNA, H/ACA box 36B [Source:HGNC Symbol;Acc:HGNC:32629]
ENSG00000222511	1	0	0	0	0	0	0	0	0	0	0	0	misc_RNA	1	8796571	8796673	Y_RNA	Y RNA [Source:RFAM;Acc:RF00019]
ENSG00000223345	2	0	1	0	0	3	0	3	0	1	2	0	transcribed_unprocessed_pseudogene	1	121108210	121117257	HIST2H2BA	histone cluster 2, H2ba (pseudogene) [Source:HGNC Symbol;Acc:HGNC:20560]
ENSG00000223356	1	0	5	2	1	0	1	3	3	1	0	0	antisense	1	156712212	156713174	RP11-66D17.5
ENSG00000223382	2	2	8	10	5	6	1	6	5	8	3	1	lincRNA	1	30824228	30834284	RP1-65J11.1
ENSG00000223390	0	0	2	3	1	0	1	1	2	0	1	0	antisense	1	52033391	52044279	RP11-91A18.4
ENSG00000223393	4	5	10	7	8	7	6	2	6	6	3	13	antisense	1	230874846	230879015	RP5-858B6.3
ENSG00000223396	122	141	219	201	147	164	109	119	143	100	160	132	lincRNA	1	201518703	201530474	RPS10P7	ribosomal protein S10 pseudogene 7 [Source:HGNC Symbol;Acc:HGNC:36423]
ENSG00000223416	0	1	1	0	0	1	2	0	1	0	2	1	processed_pseudogene	1	58056133	58056480	RPS26P15	ribosomal protein S26 pseudogene 15 [Source:HGNC Symbol;Acc:HGNC:35680]
ENSG00000223452	0	1	1	1	0	1	1	0	0	1	0	1	processed_pseudogene	1	155148544	155148813	HMGN2P18	high mobility group nucleosomal binding domain 2 pseudogene 18 [Source:HGNC Symbol;Acc:HGNC:39382]
ENSG00000223519	0	0	0	0	2	0	0	1	0	1	0	0	unitary_pseudogene	1	246771837	246830059	KIF28P	kinesin family member 28, pseudogene [Source:HGNC Symbol;Acc:HGNC:49205]
ENSG00000223525	0	0	0	0	0	0	0	0	0	0	0	1	sense_intronic	1	174896958	174897996	RABGAP1L-IT1	RABGAP1L intronic transcript 1 (non-protein coding) [Source:HGNC Symbol;Acc:HGNC:41471]
ENSG00000223575	0	0	1	0	1	1	0	0	1	0	0	0	processed_pseudogene	1	119084998	119085954	RBMX2P3	RNA binding motif protein, X-linked 2 pseudogene 3 [Source:HGNC Symbol;Acc:HGNC:39925]
ENSG00000223583	0	0	2	3	0	2	0	1	0	0	0	0	processed_pseudogene	1	26454653	26455187	RP3-476K8.4
ENSG00000223599	3	6	6	9	11	3	8	4	7	3	4	3	processed_pseudogene	1	153852106	153853414	RP11-216N14.7
ENSG00000223612	0	0	0	0	0	0	1	0	0	0	0	0	processed_pseudogene	1	145233001	145233519	RP11-289I10.2
ENSG00000223624	0	0	0	0	0	0	1	0	0	0	0	0	processed_pseudogene	1	25888970	25889109	RP1-125I3.4
ENSG00000223635	2	3	2	2	1	2	0	0	3	1	1	2	antisense	1	229508501	229514272	RP4-613A2.1
ENSG00000223643	0	1	0	0	0	0	0	0	1	0	0	1	lincRNA	1	16851257	16853129	RP11-108M9.1
ENSG00000223653	0	0	1	0	0	1	1	0	1	1	1	0	antisense	1	85276715	85448124	RP11-131L23.1
ENSG00000223663	0	1	0	0	0	0	0	0	0	0	0	2	processed_pseudogene	1	1378666	1379032	RP5-890O3.3
ENSG00000223694	0	0	0	0	0	0	1	0	0	0	0	0	processed_pseudogene	1	240170155	240171291	ADH5P3	alcohol dehydrogenase 5 (class III), chi polypeptide, pseudogene 3 [Source:HGNC Symbol;Acc:HGNC:22991]
ENSG00000223745	107	119	117	141	128	131	92	68	97	96	119	113	processed_transcript	1	93262186	93346025	RP4-717I23.3
ENSG00000223764	154	172	197	378	391	385	91	63	117	110	170	141	lincRNA	1	916865	921016	RP11-54O7.3
ENSG00000223774	0	1	0	3	3	3	0	0	0	3	2	2	antisense	1	201893842	201899978	RP11-307B6.3
ENSG00000223776	49	41	57	55	50	56	49	41	49	34	61	61	antisense	1	236523052	236524508	LGALS8-AS1	LGALS8 antisense RNA 1 [Source:HGNC Symbol;Acc:HGNC:40340]
ENSG00000223779	0	2	0	4	0	4	1	0	0	0	1	1	unprocessed_pseudogene	1	143745249	143757452	RP11-403I13.4
ENSG00000223787	0	1	0	0	0	1	1	0	0	0	0	0	processed_pseudogene	1	92580476	92580821	RP4-593M8.1
ENSG00000223804	1	2	4	8	8	16	3	4	2	6	13	8	transcribed_unprocessed_pseudogene	1	120267334	120341871	CH17-472G23.2
ENSG00000223823	0	0	0	0	0	0	1	1	1	0	0	0	lincRNA	1	1137017	1144056	LINC01342	long intergenic non-protein coding RNA 1342 [Source:HGNC Symbol;Acc:HGNC:50551]
ENSG00000223861	6	6	3	6	6	5	1	1	2	4	2	0	processed_pseudogene	1	151557446	151557940	RP11-74C1.2
ENSG00000223906	0	0	0	1	0	0	0	0	0	0	0	1	lincRNA	1	100344477	100345242	RP5-837M10.2
ENSG00000223907	0	0	1	1	0	2	0	0	1	0	2	0	lincRNA	1	31518435	31524245	LINC01226	long intergenic non-protein coding RNA 1226 [Source:HGNC Symbol;Acc:HGNC:49678]
ENSG00000223920	0	0	0	0	0	0	0	0	0	0	1	0	processed_pseudogene	1	61654194	61654908	MGC34796	sepiapterin reductase (7,8-dihydrobiopterin:NADP+ oxidoreductase) pseudogene [Source:EntrezGene;Acc:414927]
ENSG00000223956	4	5	6	1	1	0	5	6	9	4	1	5	lincRNA	1	56414963	56415966	RP4-710M16.2
ENSG00000223963	0	0	0	0	0	1	0	0	0	0	0	0	processed_pseudogene	1	240769420	240771534	PRKRIRP8	protein-kinase, interferon-inducible double stranded RNA dependent inhibitor, repressor of (P58 repressor) pseudogene 8 [Source:HGNC Symbol;Acc:HGNC:39572]
ENSG00000223972	0	0	2	2	1	0	0	1	2	0	2	1	transcribed_unprocessed_pseudogene	1	11869	14409	DDX11L1	DEAD/H (Asp-Glu-Ala-Asp/His) box helicase 11 like 1 [Source:HGNC Symbol;Acc:HGNC:37102]
ENSG00000223982	1	0	0	0	0	0	0	0	0	0	0	0	processed_pseudogene	1	231475956	231476288	SNRPD2P2	small nuclear ribonucleoprotein D2 pseudogene 2 [Source:HGNC Symbol;Acc:HGNC:38598]
ENSG00000223989	2	3	0	2	1	0	2	0	3	2	1	1	antisense	1	9848318	9850154	RP11-84A14.5
ENSG00000224014	0	0	3	0	0	1	0	2	1	1	2	1	processed_pseudogene	1	247175256	247175525	RP11-488L18.6
ENSG00000224051	797	870	1097	989	885	1017	732	726	813	530	724	713	protein_coding	1	1324756	1328897	CPTP	ceramide-1-phosphate transfer protein [Source:HGNC Symbol;Acc:HGNC:28116]
ENSG00000224064	0	0	1	1	0	0	0	0	0	0	1	0	processed_pseudogene	1	26983628	26984024	RP11-344H11.5
ENSG00000224066	12	15	10	16	18	15	10	9	10	9	13	15	antisense	1	32204769	32206814	RP4-622L5.7
ENSG00000224081	5	4	3	15	14	12	4	6	4	4	14	8	lincRNA	1	94638461	94820281	LINC01057	long intergenic non-protein coding RNA 1057 [Source:HGNC Symbol;Acc:HGNC:49057]
ENSG00000224093	0	0	0	0	0	0	0	0	1	1	0	1	antisense	1	93592199	93605573	RP5-1033H22.2
ENSG00000224114	0	1	1	1	1	1	0	0	0	0	0	0	processed_pseudogene	1	206695837	206696269	RP11-343H5.4
ENSG00000224183	0	0	0	0	1	0	0	0	0	0	0	0	processed_pseudogene	1	25294164	25294643	SDHDP6	succinate dehydrogenase complex, subunit D, integral membrane protein pseudogene 6 [Source:HGNC Symbol;Acc:HGNC:10689]
ENSG00000224209	0	0	1	3	2	4	0	0	2	0	0	0	lincRNA	1	63189989	63317231	LINC00466	long intergenic non-protein coding RNA 466 [Source:HGNC Symbol;Acc:HGNC:27294]
ENSG00000224227	0	0	0	0	1	0	0	0	1	0	2	2	unprocessed_pseudogene	1	247990267	247991204	OR2L1P	olfactory receptor, family 2, subfamily L, member 1 pseudogene [Source:HGNC Symbol;Acc:HGNC:8265]
ENSG00000224238	1	2	2	2	1	2	2	2	0	0	2	0	antisense	1	119047405	119064785	WARS2-IT1	WARS2 intronic transcript 1 (non-protein coding) [Source:HGNC Symbol;Acc:HGNC:41393]
ENSG00000224255	1	0	0	2	0	1	0	0	1	0	0	1	processed_pseudogene	1	52179848	52180553	PDCL3P6	phosducin-like 3 pseudogene 6 [Source:HGNC Symbol;Acc:HGNC:44507]
ENSG00000224259	133	125	166	163	153	208	110	109	113	130	169	163	lincRNA	1	159961218	159979061	LINC01133	long intergenic non-protein coding RNA 1133 [Source:HGNC Symbol;Acc:HGNC:49447]
ENSG00000224261	2	1	3	0	0	1	0	1	1	0	0	1	processed_pseudogene	1	160266340	160267225	RP11-179G5.1
ENSG00000224308	1	4	0	0	0	1	1	0	0	0	2	0	antisense	1	152930040	152949210	LINC01527	long intergenic non-protein coding RNA 1527 [Source:HGNC Symbol;Acc:HGNC:51266]
ENSG00000224315	1	0	0	5	2	4	1	2	1	2	2	4	processed_pseudogene	1	8786211	8786913	RPL7P7	ribosomal protein L7 pseudogene 7 [Source:HGNC Symbol;Acc:HGNC:36895]
ENSG00000224321	0	0	0	0	0	0	0	0	0	0	1	0	processed_pseudogene	1	15792796	15793285	RP11-169K16.6
ENSG00000224335	0	0	0	0	1	0	0	0	0	0	0	0	unprocessed_pseudogene	1	148234273	148234489	RP11-301M17.2
ENSG00000224358	55	43	59	45	45	41	32	34	39	21	41	43	antisense	1	165768929	165775176	RP11-466F5.8
ENSG00000224363	0	0	0	0	0	1	0	0	0	0	0	0	lincRNA	1	144641371	144919902	RP11-289H16.1
ENSG00000224387	3	0	1	3	5	1	0	0	1	1	0	1	antisense	1	2492300	2493258	RP3-395M20.2
ENSG00000224409	0	1	1	0	0	0	0	0	0	0	1	0	antisense	1	32717734	32725237	RP11-114B7.6
ENSG00000224462	2	2	1	12	8	5	1	1	5	4	4	4	unprocessed_pseudogene	1	207165496	207183910	C4BPAP1	complement component 4 binding protein, alpha pseudogene 1 [Source:HGNC Symbol;Acc:HGNC:1326]
ENSG00000224481	1	0	0	0	0	0	0	0	0	0	0	1	lincRNA	1	148328999	148344636	RP11-495P10.3
ENSG00000224494	0	0	0	0	1	0	0	0	1	0	0	0	processed_pseudogene	1	81426456	81427605	HNRNPA3P14	heterogeneous nuclear ribonucleoprotein A3 pseudogene 14 [Source:HGNC Symbol;Acc:HGNC:48760]
ENSG00000224520	2	3	3	0	3	1	1	2	0	2	0	1	processed_pseudogene	1	157073257	157074703	KRT8P45	keratin 8 pseudogene 45 [Source:HGNC Symbol;Acc:HGNC:39879]
ENSG00000224525	0	0	1	0	0	0	0	0	0	0	0	0	antisense	1	242203555	242210827	RP11-561I11.3
ENSG00000224536	24	26	26	18	27	32	14	12	15	17	12	25	antisense	1	201507241	201533608	RP11-134G8.7
ENSG00000224550	0	0	0	0	0	1	0	0	0	0	0	0	processed_pseudogene	1	107505203	107505448	RP11-270C12.3
ENSG00000224566	1	2	0	1	3	1	1	0	1	2	1	0	processed_pseudogene	1	228114997	228115473	FAM96AP2	family with sequence similarity 96, member A pseudogene 2 [Source:HGNC Symbol;Acc:HGNC:43862]
ENSG00000224616	21	41	58	37	42	45	34	28	45	29	36	38	antisense	1	100264009	100266120	RTCA-AS1	RTCA antisense RNA 1 [Source:HGNC Symbol;Acc:HGNC:50573]
ENSG00000224621	2	0	1	0	1	1	2	2	0	0	0	0	antisense	1	16159266	16161883	RP11-276H7.3
ENSG00000224645	0	1	0	0	0	0	0	0	1	0	0	0	antisense	1	151340648	151341966	RP11-126K1.8
ENSG00000224668	0	0	1	0	1	0	0	1	0	1	0	0	processed_pseudogene	1	210859177	210862285	IPO8P1	importin 8 pseudogene 1 [Source:HGNC Symbol;Acc:HGNC:41955]
ENSG00000224680	2	1	3	2	4	2	1	3	3	2	3	0	processed_pseudogene	1	52368677	52369244	PLA2G12AP1	phospholipase A2, group XIIA pseudogene 1 [Source:HGNC Symbol;Acc:HGNC:39248]
ENSG00000224685	0	0	0	0	0	0	0	0	1	0	0	0	processed_pseudogene	1	100651947	100652267	RP11-84O12.3
ENSG00000224687	17	16	27	21	32	30	17	14	18	25	34	19	lincRNA	1	178091508	178093984	RASAL2-AS1	RASAL2 antisense RNA 1 [Source:HGNC Symbol;Acc:HGNC:44170]
ENSG00000224691	1	0	0	0	0	0	0	0	0	0	0	0	antisense	1	186176814	186177302	GS1-174L6.4
ENSG00000224699	23	27	29	21	19	21	20	20	16	9	18	19	antisense	1	110382819	110432360	LAMTOR5-AS1	LAMTOR5 antisense RNA 1 [Source:HGNC Symbol;Acc:HGNC:40823]
ENSG00000224717	1	0	0	0	1	0	0	0	0	0	0	0	lincRNA	1	205455929	205469024	RP11-576D8.4
ENSG00000224763	0	1	0	0	3	1	0	0	1	1	0	1	processed_pseudogene	1	211660189	211661277	FDPSP8	farnesyl diphosphate synthase pseudogene 8 [Source:HGNC Symbol;Acc:HGNC:39085]
ENSG00000224800	1	1	1	0	0	1	0	0	0	0	0	0	processed_pseudogene	1	150881236	150881683	RP11-235D19.2
ENSG00000224805	18	24	23	39	47	42	16	12	25	30	36	32	antisense	1	47179250	47180339	LINC00853	long intergenic non-protein coding RNA 853 [Source:HGNC Symbol;Acc:HGNC:43716]
ENSG00000224810	2	3	5	5	9	7	10	9	6	1	6	4	lincRNA	1	182062677	182069253	RP11-538D16.2
ENSG00000224834	0	0	1	1	0	0	0	0	0	0	0	0	processed_pseudogene	1	227434064	227434346	BTF3P9	basic transcription factor 3 pseudogene 9 [Source:HGNC Symbol;Acc:HGNC:38573]
ENSG00000224870	696	694	874	877	821	915	594	517	715	466	669	606	processed_transcript	1	1399522	1402046	RP4-758J18.2
ENSG00000224939	1	0	0	1	2	2	0	0	1	0	0	1	lincRNA	1	234629311	234634780	LINC00184	long intergenic non-protein coding RNA 184 [Source:HGNC Symbol;Acc:HGNC:37192]
ENSG00000224950	0	1	1	1	1	1	2	1	0	0	2	0	lincRNA	1	116493016	116499212	RP5-1086K13.1
ENSG00000224956	34	34	42	31	36	43	34	32	15	24	31	34	unprocessed_pseudogene	1	726231	728147	RP11-206L10.1
ENSG00000224969	3	3	3	0	3	0	2	2	4	0	0	2	antisense	1	1011997	1013193	RP11-54O7.11
ENSG00000224977	0	1	0	1	1	0	0	0	0	0	1	0	lincRNA	1	174022509	174022985	RP11-160H22.3
ENSG00000224985	9	15	20	7	10	12	16	6	18	9	11	19	antisense	1	161153760	161159349	RP11-297K8.2
ENSG00000224986	1	0	0	0	0	2	1	0	0	1	3	4	processed_pseudogene	1	48325080	48326123	PPP1R8P1	protein phosphatase 1, regulatory subunit 8 pseudogene 1 [Source:HGNC Symbol;Acc:HGNC:9297]
ENSG00000225030	1	0	0	0	0	0	0	0	0	0	0	0	sense_intronic	1	53291791	53292138	RP4-784A16.3
ENSG00000225075	0	0	1	0	0	0	0	0	0	0	0	0	antisense	1	112693688	112696621	RP11-426L16.3
ENSG00000225077	8	12	11	11	5	12	8	10	12	5	4	11	lincRNA	1	6236240	6239444	LINC00337	long intergenic non-protein coding RNA 337 [Source:HGNC Symbol;Acc:HGNC:28620]
ENSG00000225082	0	1	0	1	0	0	0	0	0	0	0	0	unprocessed_pseudogene	1	155586644	155602197	DAP3P1	death associated protein 3 pseudogene 1 [Source:HGNC Symbol;Acc:HGNC:17624]
ENSG00000225087	2	2	1	1	1	1	0	1	1	0	0	0	lincRNA	1	72748921	72899140	RP4-660H19.1
ENSG00000225099	0	0	1	1	0	1	0	0	0	0	0	0	processed_pseudogene	1	42903232	42903912	ATP6V1E1P1	ATPase, H+ transporting, lysosomal 31kDa, V1 subunit E1 pseudogene 1 [Source:HGNC Symbol;Acc:HGNC:859]
ENSG00000225159	4	2	0	1	2	3	2	4	2	2	5	4	processed_pseudogene	1	27206930	27207796	NPM1P39	nucleophosmin 1 (nucleolar phosphoprotein B23, numatrin) pseudogene 39 [Source:HGNC Symbol;Acc:HGNC:45218]
ENSG00000225171	2	0	0	0	1	2	1	0	0	2	1	1	processed_pseudogene	1	166868748	166869209	DUTP6	deoxyuridine triphosphatase pseudogene 6 [Source:HGNC Symbol;Acc:HGNC:39519]
ENSG00000225217	2	0	2	2	2	0	1	0	4	1	1	2	unprocessed_pseudogene	1	161606291	161608217	HSPA7	heat shock 70kDa protein 7 (HSP70B) [Source:HGNC Symbol;Acc:HGNC:5240]
ENSG00000225265	79	97	102	76	61	80	72	68	79	43	54	50	antisense	1	222589825	222593032	TAF1A-AS1	TAF1A antisense RNA 1 [Source:HGNC Symbol;Acc:HGNC:40573]
ENSG00000225279	0	1	1	0	1	1	1	0	1	0	1	2	antisense	1	160062488	160079821	RP11-536C5.2
ENSG00000225285	34	29	56	41	32	28	19	32	29	15	33	38	lincRNA	1	1430539	1434573	RP4-758J18.10
ENSG00000225300	5	8	14	19	20	9	3	6	6	9	7	12	sense_intronic	1	246605873	246608102	RP11-1086F11.1
ENSG00000225338	1	1	2	2	1	2	5	4	1	1	1	3	processed_pseudogene	1	212309051	212309518	RP11-384C4.3
ENSG00000225401	0	0	0	2	1	0	0	0	0	0	0	0	transcribed_processed_pseudogene	1	244394976	244395660	TGIF2P1	TGFB-induced factor homeobox 2 pseudogene 1 [Source:HGNC Symbol;Acc:HGNC:33317]
ENSG00000225446	1	0	1	0	0	0	1	1	0	1	0	1	lincRNA	1	90851759	90854286	RP4-665J23.2
ENSG00000225447	2	2	2	2	7	3	2	3	2	0	4	4	processed_pseudogene	1	45645816	45646197	RPS15AP10	ribosomal protein S15a pseudogene 10 [Source:HGNC Symbol;Acc:HGNC:37001]
ENSG00000225475	2	3	4	3	3	1	2	1	2	1	1	1	processed_pseudogene	1	56619409	56619549	RP11-377K22.2
ENSG00000225492	0	0	0	0	0	0	0	1	1	1	0	0	transcribed_unprocessed_pseudogene	1	89407679	89426243	GBP1P1	guanylate binding protein 1, interferon-inducible pseudogene 1 [Source:HGNC Symbol;Acc:HGNC:39561]
ENSG00000225506	11	14	13	8	11	8	7	6	9	4	9	4	lincRNA	1	47096653	47179271	CYP4A22-AS1	CYP4A22 antisense RNA 1 [Source:HGNC Symbol;Acc:HGNC:43715]
ENSG00000225514	0	0	0	1	0	0	0	0	0	0	0	0	transcribed_processed_pseudogene	1	47164510	47165920	MTND1P34	MT-ND1 pseudogene 34 [Source:HGNC Symbol;Acc:HGNC:42090]
ENSG00000225518	30	24	28	32	25	25	16	16	27	22	32	28	lincRNA	1	226083639	226090292	RP11-396C23.2
ENSG00000225556	9	7	15	8	12	10	9	6	12	4	9	8	protein_coding	1	151837819	151840557	C2CD4D	C2 calcium-dependent domain containing 4D [Source:HGNC Symbol;Acc:HGNC:37210]
ENSG00000225568	0	0	1	1	0	0	0	0	0	2	1	0	processed_pseudogene	1	87045875	87046700	RP11-384B12.3
ENSG00000225591	1	1	1	0	0	0	1	1	0	2	1	1	processed_pseudogene	1	173741674	173741928	RP11-360D2.2
ENSG00000225598	0	0	0	0	0	0	0	0	0	1	0	0	lincRNA	1	80373364	80374621	RP11-339D23.1
ENSG00000225630	975	984	1189	966	1070	1513	1041	758	1025	525	772	834	unprocessed_pseudogene	1	629640	630683	MTND2P28	MT-ND2 pseudogene 28 [Source:HGNC Symbol;Acc:HGNC:42129]
ENSG00000225643	7	3	6	1	0	2	0	5	5	2	3	6	lincRNA	1	25581478	25590356	RP11-70P17.1
ENSG00000225650	0	0	1	0	0	0	0	0	0	0	0	0	processed_pseudogene	1	114468315	114469282	EIF2S2P5	eukaryotic translation initiation factor 2, subunit 2 beta pseudogene 5 [Source:HGNC Symbol;Acc:HGNC:37793]
ENSG00000225667	0	0	1	0	1	0	0	0	0	0	1	0	lincRNA	1	46455823	46482475	LINC00505	long intergenic non-protein coding RNA 505 [Source:HGNC Symbol;Acc:HGNC:43556]
ENSG00000225671	2	0	0	0	0	1	1	0	0	0	1	0	processed_pseudogene	1	50405430	50406024	FCF1P6	FCF1 pseudogene 6 [Source:HGNC Symbol;Acc:HGNC:44618]
ENSG00000225675	18	21	30	23	14	24	17	9	14	9	12	16	lincRNA	1	53328233	53336509	RP4-784A16.5
ENSG00000225704	1	1	0	0	0	1	1	0	0	0	0	1	processed_pseudogene	1	171345089	171345320	RP4-798A17.5
ENSG00000225721	10	12	7	12	8	9	8	1	14	3	5	10	antisense	1	44759037	44775810	RP11-269F19.2
ENSG00000225750	1	1	0	1	1	1	0	0	0	0	0	0	lincRNA	1	29144494	29146994	RP11-242O24.3
ENSG00000225762	0	0	0	1	1	1	0	0	0	0	0	1	antisense	1	47380928	47408477	LINC01389	long intergenic non-protein coding RNA 1389 [Source:HGNC Symbol;Acc:HGNC:50661]
ENSG00000225779	0	0	0	1	0	0	0	0	0	0	0	0	processed_pseudogene	1	46370586	46370955	RP4-603I14.3
ENSG00000225828	164	222	228	254	247	203	145	148	180	109	192	197	protein_coding	1	32361270	32364278	FAM229A	family with sequence similarity 229, member A [Source:HGNC Symbol;Acc:HGNC:44652]
ENSG00000225855	36	32	30	64	38	54	21	20	35	20	46	26	antisense	1	155316863	155324176	RUSC1-AS1	RUSC1 antisense RNA 1 [Source:HGNC Symbol;Acc:HGNC:26680]
ENSG00000225857	0	0	0	0	1	0	0	1	0	1	0	1	lincRNA	1	180906651	180909166	RP11-46A10.2
ENSG00000225871	0	0	0	0	2	2	0	0	0	0	2	0	processed_pseudogene	1	148435105	148436926	RP11-495P10.10
ENSG00000225880	29	22	23	27	23	32	14	15	30	14	21	23	lincRNA	1	826206	827522	LINC00115	long intergenic non-protein coding RNA 115 [Source:HGNC Symbol;Acc:HGNC:26211]
ENSG00000225891	1	1	0	3	0	2	2	3	3	1	1	0	antisense	1	26462756	26467282	RP3-476K8.3
ENSG00000225934	0	0	0	0	0	1	0	0	0	0	0	0	processed_pseudogene	1	227598424	227599094	RP4-566D2.1
ENSG00000225972	10	10	17	15	15	21	5	3	12	9	7	12	unprocessed_pseudogene	1	629062	629433	MTND1P23	MT-ND1 pseudogene 23 [Source:HGNC Symbol;Acc:HGNC:42092]
ENSG00000225982	0	0	1	0	0	0	0	0	0	0	0	0	lincRNA	1	182086551	182090112	RP11-538D16.3
ENSG00000225984	0	0	0	1	0	0	0	0	2	0	0	0	processed_pseudogene	1	229705234	229705861	HMGB1P26	high mobility group box 1 pseudogene 26 [Source:HGNC Symbol;Acc:HGNC:39117]
ENSG00000225986	0	0	0	0	0	0	0	0	0	0	1	0	antisense	1	20184242	20186486	UBXN10-AS1	UBXN10 antisense RNA 1 [Source:HGNC Symbol;Acc:HGNC:41141]
ENSG00000226015	2	2	1	5	4	4	1	6	5	0	2	3	processed_pseudogene	1	147203276	147204932	CCT8P1	chaperonin containing TCP1, subunit 8 (theta) pseudogene 1 [Source:HGNC Symbol;Acc:HGNC:35144]
ENSG00000226026	0	1	1	1	5	0	0	1	2	0	1	0	antisense	1	95163219	95233982	RP11-57H12.3
ENSG00000226029	7	8	8	12	6	9	4	3	11	4	8	6	lincRNA	1	16460948	16468481	RP4-798A10.2
ENSG00000226053	0	0	1	0	0	0	0	0	0	0	0	0	lincRNA	1	98210747	98272658	RP5-1070A16.1
ENSG00000226067	17	16	13	24	22	17	9	13	9	10	15	22	lincRNA	1	120913275	121009291	LINC00869	long intergenic non-protein coding RNA 869 [Source:EntrezGene;Acc:57234]
ENSG00000226084	3	3	8	6	3	8	6	2	8	2	4	1	processed_pseudogene	1	77129114	77129668	RP4-706A16.3
ENSG00000226126	0	0	0	1	0	0	1	0	0	0	1	0	processed_pseudogene	1	118614333	118615646	PSMC1P12	proteasome (prosome, macropain) 26S subunit, ATPase, 1 pseudogene 12 [Source:HGNC Symbol;Acc:HGNC:39787]
ENSG00000226167	0	0	1	0	0	0	1	0	0	0	0	1	antisense	1	113856635	113901237	AP4B1-AS1	AP4B1 antisense RNA 1 [Source:HGNC Symbol;Acc:HGNC:44114]
ENSG00000226191	0	1	0	0	2	0	1	3	2	1	1	0	processed_pseudogene	1	247936061	247937513	CLK3P2	CDC-like kinase 3 pseudogene 2 [Source:HGNC Symbol;Acc:HGNC:49786]
ENSG00000226235	0	0	0	0	1	0	0	0	0	0	0	0	antisense	1	205373252	205387440	LEMD1-AS1	LEMD1 antisense RNA 1 [Source:HGNC Symbol;Acc:HGNC:44132]
ENSG00000226251	0	0	2	0	1	2	1	1	0	0	0	1	lincRNA	1	212225278	212238977	RP11-15I11.3
ENSG00000226286	0	0	0	0	0	0	0	0	0	0	1	0	antisense	1	3132927	3133709	RP1-163G9.2
ENSG00000226292	0	0	0	0	0	1	0	0	0	0	0	0	processed_pseudogene	1	166022215	166023027	RP11-7G12.1
ENSG00000226330	0	0	0	0	0	0	0	0	1	0	0	0	antisense	1	204377850	204435846	RP11-739N20.2
ENSG00000226375	1	0	0	0	0	1	0	0	0	0	0	1	lincRNA	1	173174300	173175503	RP3-395P12.2
ENSG00000226396	1	2	3	1	0	2	1	1	1	2	3	1	processed_pseudogene	1	19608114	19608568	RPS14P3	ribosomal protein S14 pseudogene 3 [Source:HGNC Symbol;Acc:HGNC:35797]
ENSG00000226415	5	6	4	2	1	3	2	2	3	3	3	5	processed_pseudogene	1	76699789	76700538	TPI1P1	triosephosphate isomerase 1 pseudogene 1 [Source:HGNC Symbol;Acc:HGNC:35449]
ENSG00000226419	61	48	82	59	40	56	57	53	56	29	46	56	antisense	1	112956415	112999496	SLC16A1-AS1	SLC16A1 antisense RNA 1 [Source:HGNC Symbol;Acc:HGNC:49445]
ENSG00000226438	0	0	0	1	0	0	0	0	0	0	0	0	antisense	1	39249838	39257649	RP11-420K8.1
ENSG00000226443	0	0	0	0	0	0	0	0	0	0	0	1	processed_pseudogene	1	119533749	119534746	GAPDHP32	glyceraldehyde 3 phosphate dehydrogenase pseudogene 32 [Source:HGNC Symbol;Acc:HGNC:37784]
ENSG00000226446	0	0	1	0	1	0	0	0	0	0	0	0	processed_pseudogene	1	119886304	119886927	NOTCH2P1	notch 2 pseudogene 1 [Source:HGNC Symbol;Acc:HGNC:44253]
ENSG00000226457	2	2	2	1	0	1	1	0	0	2	1	1	processed_pseudogene	1	16369150	16369530	RP11-430L17.1
ENSG00000226487	0	0	0	0	0	0	0	0	0	0	0	1	lincRNA	1	20412304	20413253	RP4-749H3.2
ENSG00000226498	1	1	0	3	1	2	0	0	0	0	1	1	transcribed_processed_pseudogene	1	236819634	236820518	RP11-182B22.2
ENSG00000226499	2	1	0	2	2	1	0	1	1	0	0	1	processed_pseudogene	1	44843921	44844082	RP5-882O7.1
ENSG00000226520	0	0	0	1	0	0	0	0	0	0	0	0	sense_intronic	1	158025550	158031166	KIRREL-IT1	KIRREL intronic transcript 1 (non-protein coding) [Source:HGNC Symbol;Acc:HGNC:41412]
ENSG00000226526	0	0	1	0	0	1	0	0	0	0	0	0	antisense	1	16978926	17005091	RP1-37C10.3
ENSG00000226570	1	0	0	0	0	0	0	0	0	0	0	0	processed_pseudogene	1	182955390	182956148	RP11-505O17.1
ENSG00000226643	1	1	1	1	0	1	0	1	0	0	0	0	lincRNA	1	222452738	222454705	RP11-358H9.1
ENSG00000226663	0	0	0	1	0	0	0	0	0	0	0	0	processed_pseudogene	1	235540053	235541415	MTND4P10	MT-ND4 pseudogene 10 [Source:HGNC Symbol;Acc:HGNC:42225]
ENSG00000226698	0	1	0	0	0	0	0	0	0	0	0	0	antisense	1	26876133	26878245	RP1-50O24.6
ENSG00000226723	1	1	0	2	1	0	1	0	0	0	1	0	processed_pseudogene	1	192246708	192247487	RP11-142L4.3
ENSG00000226754	64	78	83	61	63	83	56	43	64	46	65	67	antisense	1	53238610	53242783	RP5-1024G6.5
ENSG00000226755	1	2	0	0	0	0	0	0	0	0	0	0	processed_pseudogene	1	117549415	117549922	VPS25P1	VPS25 pseudogene 1 [Source:HGNC Symbol;Acc:HGNC:44250]
ENSG00000226758	0	0	0	1	1	1	1	0	0	0	1	0	sense_intronic	1	231925834	231945233	DISC1-IT1	DISC1 intronic transcript 1 (non-protein coding) [Source:HGNC Symbol;Acc:HGNC:41325]
ENSG00000226766	0	0	0	0	0	1	0	0	0	0	0	0	processed_pseudogene	1	243624666	243625056	FABP7P1	fatty acid binding protein 7, brain pseudogene 1 [Source:HGNC Symbol;Acc:HGNC:41951]
ENSG00000226835	0	0	0	0	0	1	0	0	0	0	0	2	lincRNA	1	94333267	94334848	RP11-148B18.3
ENSG00000226849	1	2	1	2	3	1	3	2	3	2	5	3	antisense	1	11068471	11073097	RP4-635E18.7
ENSG00000226852	1	0	0	0	0	0	0	0	1	0	0	0	lincRNA	1	28867575	28871267	RP1-212P9.2
ENSG00000226855	2	2	0	1	3	3	3	0	1	1	4	1	processed_pseudogene	1	154378207	154379089	RP11-350G8.3
ENSG00000226862	1	1	2	1	2	1	1	0	0	0	1	1	antisense	1	202604268	202605293	RP11-569A11.1
ENSG00000226889	0	1	1	1	0	1	0	0	0	0	1	0	antisense	1	161765325	161766227	RP11-474I16.8
ENSG00000226891	0	1	1	1	0	2	1	3	0	2	0	1	lincRNA	1	64972225	65002476	LINC01359	long intergenic non-protein coding RNA 1359 [Source:HGNC Symbol;Acc:HGNC:50591]
ENSG00000226944	2	1	0	5	7	3	2	1	0	2	1	1	antisense	1	6204840	6205780	RP1-120G22.11
ENSG00000226945	1	0	2	0	0	0	0	0	1	0	0	0	processed_pseudogene	1	206907619	206908229	RP11-564A8.4
ENSG00000226957	1	0	0	1	0	0	0	1	1	0	1	0	antisense	1	46046818	46048368	RP4-533D7.4
ENSG00000226969	0	3	0	4	1	6	0	0	0	1	3	0	antisense	1	2049203	2050070	RP11-547D24.3
ENSG00000226970	1	0	0	0	2	0	0	0	0	0	0	2	processed_pseudogene	1	84244334	84244577	RP11-82H13.2
ENSG00000226984	0	0	0	0	0	0	0	0	0	0	1	0	processed_pseudogene	1	114459934	114460360	RP4-591B8.2
ENSG00000226986	0	5	2	0	0	0	2	1	2	1	1	1	processed_pseudogene	1	211207239	211207897	RP11-543B16.2
ENSG00000227001	5	4	5	11	8	9	4	7	7	4	5	5	unprocessed_pseudogene	1	21424625	21427967	NBPF2P	neuroblastoma breakpoint family, member 2, pseudogene [Source:HGNC Symbol;Acc:HGNC:31987]
ENSG00000227034	0	0	0	0	0	0	1	0	0	1	0	0	processed_pseudogene	1	99008218	99008474	RP11-234N17.1
ENSG00000227045	0	0	1	0	0	0	0	0	0	0	0	0	antisense	1	151701026	151708386	RP11-98D18.1
ENSG00000227048	0	0	0	0	0	0	0	0	0	0	0	1	processed_pseudogene	1	201428975	201429361	RP11-134G8.2
ENSG00000227050	0	0	1	0	0	0	0	1	1	0	0	1	antisense	1	27938875	27960193	RP11-460I13.2
ENSG00000227056	0	0	0	1	0	0	0	0	0	0	0	0	processed_pseudogene	1	119219314	119220096	RPL6P2	ribosomal protein L6 pseudogene 2 [Source:HGNC Symbol;Acc:HGNC:35964]
ENSG00000227066	3	3	5	0	1	2	0	1	1	1	0	2	lincRNA	1	20154338	20160568	RP3-340N1.2
ENSG00000227070	1	4	7	0	0	0	3	5	9	1	0	0	antisense	1	51518309	51561629	RP11-191G24.1
ENSG00000227082	1	0	0	2	1	0	0	0	0	1	0	1	lincRNA	1	121396754	121463129	CH17-437K3.1
ENSG00000227135	1	0	0	0	0	0	0	0	0	0	0	0	antisense	1	247524679	247526752	GCSAML-AS1	GCSAML antisense RNA 1 [Source:HGNC Symbol;Acc:HGNC:41244]
ENSG00000227141	11	15	16	8	4	8	10	10	10	2	6	6	processed_pseudogene	1	179586705	179589175	RP11-545A16.3
ENSG00000227179	0	1	4	1	1	1	4	3	1	0	0	0	transcribed_unprocessed_pseudogene	1	111382860	111391819	PGCP1	progastricsin (pepsinogen C) pseudogene 1 [Source:HGNC Symbol;Acc:HGNC:39503]
ENSG00000227232	1	1	1	0	0	0	0	0	0	0	0	0	unprocessed_pseudogene	1	14404	29570	WASH7P	WAS protein family homolog 7 pseudogene [Source:HGNC Symbol;Acc:HGNC:38034]
ENSG00000227237	1	2	0	4	1	1	1	1	2	1	0	1	antisense	1	248859164	248864796	AL672294.1
ENSG00000227242	2	3	1	0	1	3	1	0	1	0	3	0	unprocessed_pseudogene	1	147021320	147124525	NBPF13P	neuroblastoma breakpoint family, member 13, pseudogene [Source:HGNC Symbol;Acc:HGNC:31995]
ENSG00000227278	2	0	0	0	2	0	0	1	0	0	0	1	antisense	1	40514461	40515057	RP11-656D10.5
ENSG00000227288	2	0	0	0	1	0	0	0	0	1	0	0	processed_pseudogene	1	81501794	81503468	RP5-837I24.1
ENSG00000227295	1	0	2	1	0	0	2	1	2	0	0	0	processed_pseudogene	1	158175850	158177755	ELL2P1	elongation factor, RNA polymerase II, 2 pseudogene 1 [Source:HGNC Symbol;Acc:HGNC:39343]
ENSG00000227311	2	2	0	1	1	0	1	1	2	2	3	1	processed_pseudogene	1	40333078	40333557	RP1-228H13.1
ENSG00000227372	1235	1154	1427	1282	1203	1475	970	846	1174	751	1027	1058	antisense	1	3735601	3747336	TP73-AS1	TP73 antisense RNA 1 [Source:HGNC Symbol;Acc:HGNC:29052]
ENSG00000227373	3	4	6	4	1	4	6	2	5	1	3	3	lincRNA	1	174115300	174160004	RP11-160H22.5
ENSG00000227496	0	0	0	1	0	0	0	0	0	0	0	0	antisense	1	225700604	225752243	RP11-145A3.1
ENSG00000227533	20	9	11	27	25	25	9	7	9	12	15	16	lincRNA	1	42959049	42983358	SLC2A1-AS1	SLC2A1 antisense RNA 1 [Source:HGNC Symbol;Acc:HGNC:44187]
ENSG00000227579	0	0	0	0	0	0	1	1	1	0	0	0	lincRNA	1	177393287	177597709	RP1-35C21.2
ENSG00000227589	8	18	17	6	4	5	9	12	13	7	9	5	antisense	1	3658938	3668772	RP5-1092A11.5
ENSG00000227591	0	0	0	0	0	1	0	0	0	0	0	0	antisense	1	209661364	209724125	RP1-28O10.1
ENSG00000227621	3	5	3	0	0	0	1	4	3	0	0	0	processed_pseudogene	1	223856579	223857387	PHBP11	prohibitin pseudogene 11 [Source:HGNC Symbol;Acc:HGNC:39290]
ENSG00000227630	3	0	1	5	7	3	3	1	1	3	1	10	lincRNA	1	234724042	234731643	LINC01132	long intergenic non-protein coding RNA 1132 [Source:HGNC Symbol;Acc:HGNC:49444]
ENSG00000227671	597	633	812	558	508	631	534	509	625	346	492	486	transcribed_unprocessed_pseudogene	1	247189851	247210856	MIR3916	microRNA 3916 [Source:HGNC Symbol;Acc:HGNC:38912]
ENSG00000227684	0	2	0	1	0	0	0	0	0	0	1	0	unprocessed_pseudogene	1	16750233	16750964	CROCCP4	ciliary rootlet coiled-coil, rootletin pseudogene 4 [Source:HGNC Symbol;Acc:HGNC:43864]
ENSG00000227712	0	0	0	1	0	0	0	0	0	0	0	0	lincRNA	1	119260265	119327303	RP11-418J17.3
ENSG00000227733	2	0	1	0	2	1	1	0	0	1	0	0	lincRNA	1	148159213	148228658	RP4-565E6.1
ENSG00000227740	0	0	1	0	2	0	0	1	2	0	1	0	lincRNA	1	175904762	175920513	RP11-318C24.2
ENSG00000227741	5	2	4	3	1	3	5	5	3	2	3	4	antisense	1	160202199	160208869	RP11-536C5.7
ENSG00000227742	11	12	4	1	3	1	4	7	12	1	1	0	unitary_pseudogene	1	51561866	51594897	CALR4P	calreticulin 4, pseudogene [Source:HGNC Symbol;Acc:HGNC:35456]
ENSG00000227751	0	0	0	0	0	1	0	0	0	0	0	1	antisense	1	17406760	17407382	RP1-20B21.4
ENSG00000227773	2	0	2	1	0	2	0	1	1	0	3	0	sense_intronic	1	155396010	155396978	ASH1L-IT1	ASH1L intronic transcript 1 (non-protein coding) [Source:HGNC Symbol;Acc:HGNC:41449]
ENSG00000227775	8	6	13	6	8	8	4	4	3	5	4	6	transcribed_processed_pseudogene	1	1724512	1737251	RP1-283E3.4
ENSG00000227811	3	1	3	8	6	5	1	3	1	5	4	5	antisense	1	111739841	111747798	FAM212B-AS1	FAM212B antisense RNA 1 [Source:HGNC Symbol;Acc:HGNC:49446]
ENSG00000227815	0	0	0	0	0	0	0	0	1	0	0	0	unprocessed_pseudogene	1	176272483	176273402	RP11-195C7.3
ENSG00000227854	0	0	1	1	1	1	0	1	0	0	1	0	processed_pseudogene	1	239052748	239052903	RP11-307O1.1
ENSG00000227857	27	43	42	26	32	28	33	24	29	13	22	21	antisense	1	46134531	46139081	RP4-533D7.5
ENSG00000227887	0	0	1	0	1	0	0	0	0	1	0	0	processed_pseudogene	1	208697369	208697698	RPS26P13	ribosomal protein S26 pseudogene 13 [Source:HGNC Symbol;Acc:HGNC:35784]
ENSG00000227934	0	0	0	0	0	0	0	1	1	0	0	0	processed_pseudogene	1	231021611	231022183	RP11-423F24.3
ENSG00000227941	0	1	0	1	0	0	1	0	2	0	0	0	processed_pseudogene	1	162541332	162541628	UQCRBP2	ubiquinol-cytochrome c reductase binding protein pseudogene 2 [Source:HGNC Symbol;Acc:HGNC:12584]
ENSG00000227953	352	368	434	231	197	219	242	218	314	100	143	143	processed_transcript	1	246776013	246792385	LINC01341	long intergenic non-protein coding RNA 1341 [Source:HGNC Symbol;Acc:HGNC:49457]
ENSG00000227959	5	2	3	1	2	3	4	1	5	2	3	2	antisense	1	16155211	16157329	RP11-276H7.2
ENSG00000227962	3	1	3	4	1	2	0	0	0	2	0	3	processed_pseudogene	1	235336806	235337087	RP11-382D8.3
ENSG00000227963	10	9	14	5	8	5	12	7	13	4	9	3	antisense	1	110286375	110339171	RP5-1074L1.1
[truncated: 28,651 more rows]
