# Supplementary material for: TLE3 loss confers AR inhibitor resistance by facilitating GR-mediated human prostate cancer cell growth
Source: eLife journal article supplement (doi:10.7554/elife.47430), 2019-12-19
Supplement: supp [file elife-47430-supp-v1.zip]

Homer Known Motif Enrichment Results (./motifDiscoveryAR/)

Homer *de novo* Motif Results  
Gene Ontology Enrichment Results  
Known Motif Enrichment Results (txt file)  
Total Target Sequences = 1237, Total Background Sequences = 48542

| Rank | Motif | Name                                                         | P-value | log P-value | q-value (Benjamini) | # Target Sequences with Motif | % of Targets Sequences with Motif | # Background Sequences with Motif | % of Background Sequences with Motif | Motif File                          | SVG                 |
|------|-------|--------------------------------------------------------------|---------|-------------|---------------------|-------------------------------|-----------------------------------|-----------------------------------|--------------------------------------|-------------------------------------|---------------------|
| 1    |       | Foxa2(Forkhead)/Liver-Foxa2-ChIP-Seq(GSE25694)/Homer         | 1e-85   | -1.962e+02  | 0.0000              | 660.0                         | 53.35%                            | 13057.7                           | 26.90%                               | <a href="#">motif file (matrix)</a> | <a href="#">svg</a> |
| 2    |       | FOXA1(Forkhead)/LNCAP-FOXA1-ChIP-Seq(GSE27824)/Homer         | 1e-84   | -1.946e+02  | 0.0000              | 887.0                         | 71.71%                            | 21464.1                           | 44.22%                               | <a href="#">motif file (matrix)</a> | <a href="#">svg</a> |
| 3    |       | FOXM1(Forkhead)/MCF7-FOXM1-ChIP-Seq(GSE72977)/Homer          | 1e-80   | -1.851e+02  | 0.0000              | 804.0                         | 65.00%                            | 18525.1                           | 38.16%                               | <a href="#">motif file (matrix)</a> | <a href="#">svg</a> |
| 4    |       | FOXA1(Forkhead)/MCF7-FOXA1-ChIP-Seq(GSE26831)/Homer          | 1e-80   | -1.845e+02  | 0.0000              | 812.0                         | 65.64%                            | 18849.5                           | 38.83%                               | <a href="#">motif file (matrix)</a> | <a href="#">svg</a> |
| 5    |       | Foxa3(Forkhead)/Liver-Foxa3-ChIP-Seq(GSE77670)/Homer         | 1e-77   | -1.777e+02  | 0.0000              | 400.0                         | 32.34%                            | 5872.3                            | 12.10%                               | <a href="#">motif file (matrix)</a> | <a href="#">svg</a> |
| 6    |       | Fox:Ebox(Forkhead,bHLH)/Panc1-Foxa2-ChIP-Seq(GSE47459)/Homer | 1e-76   | -1.771e+02  | 0.0000              | 652.0                         | 52.71%                            | 13365.9                           | 27.53%                               | <a href="#">motif file (matrix)</a> | <a href="#">svg</a> |
| 7    |       | Foxo3(Forkhead)/U2OS-Foxo3-ChIP-Seq(E-MTAB-2701)/Homer       | 1e-52   | -1.217e+02  | 0.0000              | 583.0                         | 47.13%                            | 12929.4                           | 26.63%                               | <a href="#">motif file (matrix)</a> | <a href="#">svg</a> |
| 8    |       | FOXA1:AR(Forkhead,NR)/LNCAP-AR-ChIP-Seq(GSE27824)/Homer      | 1e-52   | -1.205e+02  | 0.0000              | 174.0                         | 14.07%                            | 1717.7                            | 3.54%                                | <a href="#">motif file (matrix)</a> | <a href="#">svg</a> |
| 9    |       | FOXK1(Forkhead)/HEK293-FOXK1-ChIP-Seq(GSE51673)/Homer        | 1e-51   | -1.192e+02  | 0.0000              | 705.0                         | 56.99%                            | 17325.1                           | 35.69%                               | <a href="#">motif file (matrix)</a> | <a href="#">svg</a> |
| 10   |       | FoxL2(Forkhead)/Ovary-FoxL2-ChIP-Seq(GSE60858)/Homer         | 1e-45   | -1.057e+02  | 0.0000              | 665.0                         | 53.76%                            | 16444.6                           | 33.88%                               | <a href="#">motif file (matrix)</a> | <a href="#">svg</a> |
| 11   |       | FOXP1(Forkhead)/H9-FOXP1-ChIP-Seq(GSE31006)/Homer            | 1e-45   | -1.040e+02  | 0.0000              | 393.0                         | 31.77%                            | 7549.7                            | 15.55%                               | <a href="#">motif file (matrix)</a> | <a href="#">svg</a> |
| 12   |       | ARE(NR)/LNCAP-AR-ChIP-Seq(GSE27824)/Homer                    | 1e-43   | -1.004e+02  | 0.0000              | 190.0                         | 15.36%                            | 2341.7                            | 4.82%                                | <a href="#">motif file (matrix)</a> | <a href="#">svg</a> |
| 13   |       | Foxf1(Forkhead)/Lung-Foxf1-ChIP-Seq(GSE77951)/Homer          | 1e-41   | -9.550e+01  | 0.0000              | 696.0                         | 56.27%                            | 18054.7                           | 37.19%                               | <a href="#">motif file</a>          | <a href="#">svg</a> |

|    |  |                                                                   |       |            |        |       |        |         |        |                                     |                     |
|----|--|-------------------------------------------------------------------|-------|------------|--------|-------|--------|---------|--------|-------------------------------------|---------------------|
|    |  |                                                                   |       |            |        |       |        |         |        | <a href="#">(matrix)</a>            |                     |
| 14 |  | FOXK2(Forkhead)/U2OS-FOXK2-ChIP-Seq(E-MTAB-2204)/Homer            | 1e-40 | -9.214e+01 | 0.0000 | 457.0 | 36.94% | 9930.7  | 20.46% | <a href="#">motif file (matrix)</a> | <a href="#">svg</a> |
| 15 |  | NF1-halfSite(CTF)/LNCaP-NF1-ChIP-Seq(Unpublished)/Homer           | 1e-38 | -8.971e+01 | 0.0000 | 680.0 | 54.97% | 17741.0 | 36.55% | <a href="#">motif file (matrix)</a> | <a href="#">svg</a> |
| 16 |  | GRE(NR),IR3/A549-GR-ChIP-Seq(GSE32465)/Homer                      | 1e-35 | -8.280e+01 | 0.0000 | 121.0 | 9.78%  | 1196.9  | 2.47%  | <a href="#">motif file (matrix)</a> | <a href="#">svg</a> |
| 17 |  | GRE(NR),IR3/RAW264.7-GRE-ChIP-Seq(Unpublished)/Homer              | 1e-35 | -8.180e+01 | 0.0000 | 182.0 | 14.71% | 2504.0  | 5.16%  | <a href="#">motif file (matrix)</a> | <a href="#">svg</a> |
| 18 |  | PR(NR)/T47D-PR-ChIP-Seq(GSE31130)/Homer                           | 1e-32 | -7.562e+01 | 0.0000 | 824.0 | 66.61% | 24098.9 | 49.64% | <a href="#">motif file (matrix)</a> | <a href="#">svg</a> |
| 19 |  | NF1(CTF)/LNCAP-NF1-ChIP-Seq(Unpublished)/Homer                    | 1e-31 | -7.322e+01 | 0.0000 | 224.0 | 18.11% | 3743.3  | 7.71%  | <a href="#">motif file (matrix)</a> | <a href="#">svg</a> |
| 20 |  | PGR(NR)/EndoStromal-PGR-ChIP-Seq(GSE69539)/Homer                  | 1e-30 | -7.062e+01 | 0.0000 | 200.0 | 16.17% | 3192.7  | 6.58%  | <a href="#">motif file (matrix)</a> | <a href="#">svg</a> |
| 21 |  | NF1:FOXA1(CTF,Forkhead)/LNCAP-FOXA1-ChIP-Seq(GSE27824)/Homer      | 1e-23 | -5.448e+01 | 0.0000 | 82.0  | 6.63%  | 832.7   | 1.72%  | <a href="#">motif file (matrix)</a> | <a href="#">svg</a> |
| 22 |  | Foxo1(Forkhead)/RAW-Foxo1-ChIP-Seq(Fan_et_al.)/Homer              | 1e-23 | -5.309e+01 | 0.0000 | 778.0 | 62.89% | 23652.4 | 48.72% | <a href="#">motif file (matrix)</a> | <a href="#">svg</a> |
| 23 |  | HOXB13(Homeobox)/ProstateTumor-HOXB13-ChIP-Seq(GSE56288)/Homer    | 1e-21 | -4.953e+01 | 0.0000 | 640.0 | 51.74% | 18540.3 | 38.19% | <a href="#">motif file (matrix)</a> | <a href="#">svg</a> |
| 24 |  | Unknown(Homeobox)/Limb-p300-ChIP-Seq/Homer                        | 1e-15 | -3.485e+01 | 0.0000 | 445.0 | 35.97% | 12457.3 | 25.66% | <a href="#">motif file (matrix)</a> | <a href="#">svg</a> |
| 25 |  | Tlx?(NR)/NPC-H3K4me1-ChIP-Seq(GSE16256)/Homer                     | 1e-14 | -3.431e+01 | 0.0000 | 182.0 | 14.71% | 3858.9  | 7.95%  | <a href="#">motif file (matrix)</a> | <a href="#">svg</a> |
| 26 |  | CDX4(Homeobox)/ZebrafishEmbryos-Cdx4.Myc-ChIP-Seq(GSE48254)/Homer | 1e-14 | -3.340e+01 | 0.0000 | 565.0 | 45.68% | 16926.8 | 34.87% | <a href="#">motif file (matrix)</a> | <a href="#">svg</a> |
| 27 |  | HOXD13(Homeobox)/Chicken-Hoxd13-ChIP-Seq(GSE38910)/Homer          | 1e-12 | -2.902e+01 | 0.0000 | 675.0 | 54.57% | 21495.4 | 44.28% | <a href="#">motif file (matrix)</a> | <a href="#">svg</a> |
| 28 |  | AR-halfsite(NR)/LNCaP-AR-ChIP-Seq(GSE27824)/Homer                 | 1e-11 | -2.725e+01 | 0.0000 | 959.0 | 77.53% | 33273.8 | 68.54% | <a href="#">motif file (matrix)</a> | <a href="#">svg</a> |
| 29 |  | Cdx2(Homeobox)/mES-Cdx2-ChIP-Seq(GSE14586)/Homer                  | 1e-9  | -2.285e+01 | 0.0000 | 480.0 | 38.80% | 14710.2 | 30.30% | <a href="#">motif file</a>          | <a href="#">svg</a> |

|    |  |                                                     |      |            |        |       |        |         |        | (matrix)                                                                |  |
|----|--|-----------------------------------------------------|------|------------|--------|-------|--------|---------|--------|-------------------------------------------------------------------------|--|
| 30 |  | Gata2(Zf)/K562-GATA2-ChIP-Seq(GSE18829)/Homer       | 1e-8 | -1.998e+01 | 0.0000 | 329.0 | 26.60% | 9545.2  | 19.66% | <a href="#">motif file</a> <a href="#">(matrix)</a> <a href="#">svg</a> |  |
| 31 |  | Gata1(Zf)/K562-GATA1-ChIP-Seq(GSE18829)/Homer       | 1e-8 | -1.969e+01 | 0.0000 | 293.0 | 23.69% | 8316.7  | 17.13% | <a href="#">motif file</a> <a href="#">(matrix)</a> <a href="#">svg</a> |  |
| 32 |  | GRHL2(CP2)/HBE-GRHL2-ChIP-Seq(GSE46194)/Homer       | 1e-6 | -1.574e+01 | 0.0000 | 182.0 | 14.71% | 4871.8  | 10.04% | <a href="#">motif file</a> <a href="#">(matrix)</a> <a href="#">svg</a> |  |
| 33 |  | Gata6(Zf)/HUG1N-GATA6-ChIP-Seq(GSE51936)/Homer      | 1e-6 | -1.568e+01 | 0.0000 | 441.0 | 35.65% | 14022.3 | 28.89% | <a href="#">motif file</a> <a href="#">(matrix)</a> <a href="#">svg</a> |  |
| 34 |  | SCL(bHLH)/HPC7-Scl-ChIP-Seq(GSE13511)/Homer         | 1e-5 | -1.378e+01 | 0.0000 | 972.0 | 78.58% | 35274.9 | 72.67% | <a href="#">motif file</a> <a href="#">(matrix)</a> <a href="#">svg</a> |  |
| 35 |  | MYB(HTH)/ERMYB-Myb-ChIP-Seq(GSE22095)/Homer         | 1e-5 | -1.366e+01 | 0.0000 | 580.0 | 46.89% | 19523.0 | 40.22% | <a href="#">motif file</a> <a href="#">(matrix)</a> <a href="#">svg</a> |  |
| 36 |  | Stat3+il21(Stat)/CD4-Stat3-ChIP-Seq(GSE19198)/Homer | 1e-5 | -1.338e+01 | 0.0000 | 263.0 | 21.26% | 7845.4  | 16.16% | <a href="#">motif file</a> <a href="#">(matrix)</a> <a href="#">svg</a> |  |
| 37 |  | Gata4(Zf)/Heart-Gata4-ChIP-Seq(GSE35151)/Homer      | 1e-5 | -1.331e+01 | 0.0000 | 459.0 | 37.11% | 14981.8 | 30.86% | <a href="#">motif file</a> <a href="#">(matrix)</a> <a href="#">svg</a> |  |
| 38 |  | ELF3(ETS)/PDAC-ELF3-ChIP-Seq(GSE64557)/Homer        | 1e-5 | -1.258e+01 | 0.0000 | 281.0 | 22.72% | 8566.0  | 17.65% | <a href="#">motif file</a> <a href="#">(matrix)</a> <a href="#">svg</a> |  |
| 39 |  | ELF5(ETS)/T47D-ELF5-ChIP-Seq(GSE30407)/Homer        | 1e-5 | -1.252e+01 | 0.0000 | 276.0 | 22.31% | 8394.1  | 17.29% | <a href="#">motif file</a> <a href="#">(matrix)</a> <a href="#">svg</a> |  |
| 40 |  | GATA3(Zf)/iTreg-Gata3-ChIP-Seq(GSE20898)/Homer      | 1e-4 | -1.087e+01 | 0.0002 | 649.0 | 52.47% | 22609.6 | 46.58% | <a href="#">motif file</a> <a href="#">(matrix)</a> <a href="#">svg</a> |  |
| 41 |  | Olig2(bHLH)/Neuron-Olig2-ChIP-Seq(GSE30882)/Homer   | 1e-4 | -1.077e+01 | 0.0002 | 623.0 | 50.36% | 21611.6 | 44.52% | <a href="#">motif file</a> <a href="#">(matrix)</a> <a href="#">svg</a> |  |
| 42 |  | BMYB(HTH)/Hela-BMYB-ChIP-Seq(GSE27030)/Homer        | 1e-4 | -1.053e+01 | 0.0002 | 527.0 | 42.60% | 17948.0 | 36.97% | <a href="#">motif file</a> <a href="#">(matrix)</a> <a href="#">svg</a> |  |
| 43 |  | Stat3(Stat)/mES-Stat3-ChIP-Seq(GSE11431)/Homer      | 1e-4 | -1.004e+01 | 0.0004 | 176.0 | 14.23% | 5149.8  | 10.61% | <a href="#">motif file</a> <a href="#">(matrix)</a> <a href="#">svg</a> |  |
| 44 |  | Zic(Zf)/Cerebellum-ZIC1.2-ChIP-Seq(GSE60731)/Homer  | 1e-4 | -9.410e+00 | 0.0007 | 244.0 | 19.73% | 7608.2  | 15.67% | <a href="#">motif file</a> <a href="#">(matrix)</a> <a href="#">svg</a> |  |
| 45 |  | TATA-Box(TBP)/Promoter/Homer                        | 1e-4 | -9.374e+00 | 0.0007 | 555.0 | 44.87% | 19207.3 | 39.57% | <a href="#">motif file</a> <a href="#">(matrix)</a> <a href="#">svg</a> |  |

|    |  |                                                               |      |            |        |       |        |         |        | (matrix)                                                                |  |
|----|--|---------------------------------------------------------------|------|------------|--------|-------|--------|---------|--------|-------------------------------------------------------------------------|--|
| 46 |  | NeuroD1(bHLH)/Islet-NeuroD1-ChIP-Seq(GSE30298)/Homer          | 1e-3 | -8.889e+00 | 0.0011 | 259.0 | 20.94% | 8212.3  | 16.92% | <a href="#">motif file</a> <a href="#">(matrix)</a> <a href="#">svg</a> |  |
| 47 |  | SPDEF(ETS)/VCaP-SPDEF-ChIP-Seq(SRA014231)/Homer               | 1e-3 | -8.551e+00 | 0.0015 | 324.0 | 26.19% | 10629.2 | 21.90% | <a href="#">motif file</a> <a href="#">(matrix)</a> <a href="#">svg</a> |  |
| 48 |  | THRb(NR)/Liver-NR1A2-ChIP-Seq(GSE52613)/Homer                 | 1e-3 | -8.528e+00 | 0.0015 | 977.0 | 78.98% | 36233.1 | 74.64% | <a href="#">motif file</a> <a href="#">(matrix)</a> <a href="#">svg</a> |  |
| 49 |  | ZNF189(Zf)/HEK293-ZNF189.GFP-ChIP-Seq(GSE58341)/Homer         | 1e-3 | -7.869e+00 | 0.0028 | 269.0 | 21.75% | 8713.8  | 17.95% | <a href="#">motif file</a> <a href="#">(matrix)</a> <a href="#">svg</a> |  |
| 50 |  | AMYB(HTH)/Testes-AMYB-ChIP-Seq(GSE44588)/Homer                | 1e-3 | -7.785e+00 | 0.0030 | 498.0 | 40.26% | 17297.1 | 35.63% | <a href="#">motif file</a> <a href="#">(matrix)</a> <a href="#">svg</a> |  |
| 51 |  | HOXA9(Homeobox)/HSC-Hoxa9-ChIP-Seq(GSE33509)/Homer            | 1e-3 | -7.735e+00 | 0.0031 | 342.0 | 27.65% | 11420.3 | 23.53% | <a href="#">motif file</a> <a href="#">(matrix)</a> <a href="#">svg</a> |  |
| 52 |  | Ap4(bHLH)/AML-Tfap4-ChIP-Seq(GSE45738)/Homer                  | 1e-3 | -7.731e+00 | 0.0031 | 337.0 | 27.24% | 11235.2 | 23.14% | <a href="#">motif file</a> <a href="#">(matrix)</a> <a href="#">svg</a> |  |
| 53 |  | Ascl1(bHLH)/NeuralTubes-Ascl1-ChIP-Seq(GSE55840)/Homer        | 1e-3 | -7.725e+00 | 0.0031 | 437.0 | 35.33% | 14986.3 | 30.87% | <a href="#">motif file</a> <a href="#">(matrix)</a> <a href="#">svg</a> |  |
| 54 |  | Atoh1(bHLH)/Cerebellum-Atoh1-ChIP-Seq(GSE22111)/Homer         | 1e-3 | -7.218e+00 | 0.0049 | 320.0 | 25.87% | 10687.2 | 22.02% | <a href="#">motif file</a> <a href="#">(matrix)</a> <a href="#">svg</a> |  |
| 55 |  | GATA(Zf).IR3/iTreg-Gata3-ChIP-Seq(GSE20898)/Homer             | 1e-3 | -7.187e+00 | 0.0050 | 103.0 | 8.33%  | 2930.8  | 6.04%  | <a href="#">motif file</a> <a href="#">(matrix)</a> <a href="#">svg</a> |  |
| 56 |  | STAT4(Stat)/CD4-Stat4-ChIP-Seq(GSE22104)/Homer                | 1e-3 | -6.922e+00 | 0.0064 | 375.0 | 30.32% | 12790.4 | 26.35% | <a href="#">motif file</a> <a href="#">(matrix)</a> <a href="#">svg</a> |  |
| 57 |  | EBF1(EBF)/Near-E2A-ChIP-Seq(GSE21512)/Homer                   | 1e-2 | -6.821e+00 | 0.0070 | 258.0 | 20.86% | 8466.8  | 17.44% | <a href="#">motif file</a> <a href="#">(matrix)</a> <a href="#">svg</a> |  |
| 58 |  | Tcf21(bHLH)/ArterySmoothMuscle-Tcf21-ChIP-Seq(GSE61369)/Homer | 1e-2 | -6.709e+00 | 0.0077 | 276.0 | 22.31% | 9144.4  | 18.84% | <a href="#">motif file</a> <a href="#">(matrix)</a> <a href="#">svg</a> |  |
| 59 |  | NeuroG2(bHLH)/Fibroblast-NeuroG2-ChIP-Seq(GSE75910)/Homer     | 1e-2 | -6.689e+00 | 0.0077 | 469.0 | 37.91% | 16395.3 | 33.77% | <a href="#">motif file</a> <a href="#">(matrix)</a> <a href="#">svg</a> |  |
| 60 |  | Sox2(HMG)/mES-Sox2-ChIP-Seq(GSE11431)/Homer                   | 1e-2 | -6.674e+00 | 0.0077 | 355.0 | 28.70% | 12084.7 | 24.89% | <a href="#">motif file</a> <a href="#">(matrix)</a> <a href="#">svg</a> |  |
| 61 |  | Unknown-ESC-element(?) /mES-Nanog-ChIP-Seq(GSE11724)/Homer    | 1e-2 | -6.554e+00 | 0.0085 | 164.0 | 13.26% | 5113.3  | 10.53% | <a href="#">motif file</a> <a href="#">(matrix)</a> <a href="#">svg</a> |  |
| 62 |  | ETV1(ETS)/GIST48-ETV1-ChIP-                                   | 1e-2 | -6.547e+00 | 0.0085 | 380.0 | 30.72% | 13046.2 | 26.88% | <a href="#">motif file</a> <a href="#">(matrix)</a> <a href="#">svg</a> |  |

|    |  |                                                                         |      |            |        |       |        |         |        |                                                                           |                     |
|----|--|-------------------------------------------------------------------------|------|------------|--------|-------|--------|---------|--------|---------------------------------------------------------------------------|---------------------|
|    |  | Seq(GSE22441)/Homer                                                     |      |            |        |       |        |         |        | <a href="#">file</a><br><a href="#">(matrix)</a>                          |                     |
| 63 |  | MyoG(bHLH)/C2C12-MyoG-ChIP-Seq(GSE36024)/Homer                          | 1e-2 | -6.505e+00 | 0.0086 | 283.0 | 22.88% | 9435.3  | 19.44% | <a href="#">motif</a><br><a href="#">file</a><br><a href="#">(matrix)</a> | <a href="#">svg</a> |
| 64 |  | Zic3(Zf)/mES-Zic3-ChIP-Seq(GSE37889)/Homer                              | 1e-2 | -6.462e+00 | 0.0089 | 148.0 | 11.96% | 4559.9  | 9.39%  | <a href="#">motif</a><br><a href="#">file</a><br><a href="#">(matrix)</a> | <a href="#">svg</a> |
| 65 |  | ETS1(ETS)/Jurkat-ETS1-ChIP-Seq(GSE17954)/Homer                          | 1e-2 | -6.293e+00 | 0.0104 | 301.0 | 24.33% | 10137.5 | 20.88% | <a href="#">motif</a><br><a href="#">file</a><br><a href="#">(matrix)</a> | <a href="#">svg</a> |
| 66 |  | GATA(Zf),IR4/iTreg-Gata3-ChIP-Seq(GSE20898)/Homer                       | 1e-2 | -6.129e+00 | 0.0120 | 45.0  | 3.64%  | 1115.6  | 2.30%  | <a href="#">motif</a><br><a href="#">file</a><br><a href="#">(matrix)</a> | <a href="#">svg</a> |
| 67 |  | Tcf12(bHLH)/GMI2878-Tcf12-ChIP-Seq(GSE32465)/Homer                      | 1e-2 | -6.116e+00 | 0.0120 | 256.0 | 20.70% | 8504.7  | 17.52% | <a href="#">motif</a><br><a href="#">file</a><br><a href="#">(matrix)</a> | <a href="#">svg</a> |
| 68 |  | ERG(ETS)/VCaP-ERG-ChIP-Seq(GSE14097)/Homer                              | 1e-2 | -6.041e+00 | 0.0127 | 459.0 | 37.11% | 16143.0 | 33.25% | <a href="#">motif</a><br><a href="#">file</a><br><a href="#">(matrix)</a> | <a href="#">svg</a> |
| 69 |  | ERE(NR),IR3/MCF7-ERa-ChIP-Seq(Unpublished)/Homer                        | 1e-2 | -5.975e+00 | 0.0134 | 84.0  | 6.79%  | 2400.3  | 4.94%  | <a href="#">motif</a><br><a href="#">file</a><br><a href="#">(matrix)</a> | <a href="#">svg</a> |
| 70 |  | Rfx6(HTH)/Min6b1-Rfx6.HA-ChIP-Seq(GSE62844)/Homer                       | 1e-2 | -5.953e+00 | 0.0135 | 303.0 | 24.49% | 10271.4 | 21.16% | <a href="#">motif</a><br><a href="#">file</a><br><a href="#">(matrix)</a> | <a href="#">svg</a> |
| 71 |  | Esrrb(NR)/mES-Esrrb-ChIP-Seq(GSE11431)/Homer                            | 1e-2 | -5.888e+00 | 0.0142 | 213.0 | 17.22% | 6967.3  | 14.35% | <a href="#">motif</a><br><a href="#">file</a><br><a href="#">(matrix)</a> | <a href="#">svg</a> |
| 72 |  | Bcl6(Zf)/Liver-Bcl6-ChIP-Seq(GSE31578)/Homer                            | 1e-2 | -5.765e+00 | 0.0159 | 451.0 | 36.46% | 15895.8 | 32.75% | <a href="#">motif</a><br><a href="#">file</a><br><a href="#">(matrix)</a> | <a href="#">svg</a> |
| 73 |  | Isl1(Homeobox)/Neuron-Isl1-ChIP-Seq(GSE31456)/Homer                     | 1e-2 | -5.686e+00 | 0.0169 | 715.0 | 57.80% | 26181.3 | 53.93% | <a href="#">motif</a><br><a href="#">file</a><br><a href="#">(matrix)</a> | <a href="#">svg</a> |
| 74 |  | EHF(ETS)/LoVo-EHF-ChIP-Seq(GSE49402)/Homer                              | 1e-2 | -5.677e+00 | 0.0169 | 415.0 | 33.55% | 14541.5 | 29.96% | <a href="#">motif</a><br><a href="#">file</a><br><a href="#">(matrix)</a> | <a href="#">svg</a> |
| 75 |  | CTCF(Zf)/CD4+-CTCF-ChIP-Seq(Barski_et_al.)/Homer                        | 1e-2 | -5.358e+00 | 0.0229 | 32.0  | 2.59%  | 758.8   | 1.56%  | <a href="#">motif</a><br><a href="#">file</a><br><a href="#">(matrix)</a> | <a href="#">svg</a> |
| 76 |  | OCT4-SOX2-TCF-NANOG(POU,Homeobox,HMG)/mES-Oct4-ChIP-Seq(GSE11431)/Homer | 1e-2 | -5.299e+00 | 0.0239 | 129.0 | 10.43% | 4032.3  | 8.31%  | <a href="#">motif</a><br><a href="#">file</a><br><a href="#">(matrix)</a> | <a href="#">svg</a> |
| 77 |  | BORIS(Zf)/K562-CTCF-ChIP-Seq(GSE32465)/Homer                            | 1e-2 | -5.202e+00 | 0.0260 | 49.0  | 3.96%  | 1304.3  | 2.69%  | <a href="#">motif</a><br><a href="#">file</a><br><a href="#">(matrix)</a> | <a href="#">svg</a> |
| 78 |  | HEB(bHLH)/mES-Heb-ChIP-Seq(GSE53233)/Homer                              | 1e-2 | -5.161e+00 | 0.0268 | 568.0 | 45.92% | 20542.5 | 42.32% | <a href="#">motif</a><br><a href="#">file</a>                             | <a href="#">svg</a> |

|    |  |                                                               |      |            |        |       |        |        |        |                                                                           |                     |
|----|--|---------------------------------------------------------------|------|------------|--------|-------|--------|--------|--------|---------------------------------------------------------------------------|---------------------|
|    |  |                                                               |      |            |        |       |        |        |        | <a href="#">(matrix)</a>                                                  |                     |
| 79 |  | RBPJ:Ebox(?bHLH)/Panc1-Rbpj1-ChIP-Seq(GSE47459)/Homer         | 1e-2 | -5.104e+00 | 0.0280 | 102.0 | 8.25%  | 3107.6 | 6.40%  | <a href="#">motif</a><br><a href="#">file</a><br><a href="#">(matrix)</a> | <a href="#">svg</a> |
| 80 |  | GABPA(ETS)/Jurkat-GABPa-ChIP-Seq(GSE17954)/Homer              | 1e-2 | -5.102e+00 | 0.0280 | 244.0 | 19.73% | 8235.8 | 16.97% | <a href="#">motif</a><br><a href="#">file</a><br><a href="#">(matrix)</a> | <a href="#">svg</a> |
| 81 |  | MafA(bZIP)/Islet-MafA-ChIP-Seq(GSE30298)/Homer                | 1e-2 | -5.070e+00 | 0.0282 | 223.0 | 18.03% | 7466.9 | 15.38% | <a href="#">motif</a><br><a href="#">file</a><br><a href="#">(matrix)</a> | <a href="#">svg</a> |
| 82 |  | AP-1(bZIP)/ThioMac-PU.1-ChIP-Seq(GSE21512)/Homer              | 1e-2 | -5.031e+00 | 0.0290 | 252.0 | 20.37% | 8544.4 | 17.60% | <a href="#">motif</a><br><a href="#">file</a><br><a href="#">(matrix)</a> | <a href="#">svg</a> |
| 83 |  | HIF2a(bHLH)/785_O-HIF2a-ChIP-Seq(GSE34871)/Homer              | 1e-2 | -4.991e+00 | 0.0298 | 104.0 | 8.41%  | 3190.8 | 6.57%  | <a href="#">motif</a><br><a href="#">file</a><br><a href="#">(matrix)</a> | <a href="#">svg</a> |
| 84 |  | JunB(bZIP)/DendriticCells-Junb-ChIP-Seq(GSE36099)/Homer       | 1e-2 | -4.911e+00 | 0.0319 | 191.0 | 15.44% | 6320.7 | 13.02% | <a href="#">motif</a><br><a href="#">file</a><br><a href="#">(matrix)</a> | <a href="#">svg</a> |
| 85 |  | Tcf3(HMG)/mES-Tcf3-ChIP-Seq(GSE11724)/Homer                   | 1e-2 | -4.756e+00 | 0.0368 | 112.0 | 9.05%  | 3501.0 | 7.21%  | <a href="#">motif</a><br><a href="#">file</a><br><a href="#">(matrix)</a> | <a href="#">svg</a> |
| 86 |  | Tbx20(T-box)/Heart-Tbx20-ChIP-Seq(GSE29636)/Homer             | 1e-2 | -4.755e+00 | 0.0368 | 72.0  | 5.82%  | 2109.3 | 4.35%  | <a href="#">motif</a><br><a href="#">file</a><br><a href="#">(matrix)</a> | <a href="#">svg</a> |
| 87 |  | PAX6(Paired,Homeobox)/Forebrain-Pax6-ChIP-Seq(GSE66961)/Homer | 1e-2 | -4.686e+00 | 0.0386 | 38.0  | 3.07%  | 986.6  | 2.03%  | <a href="#">motif</a><br><a href="#">file</a><br><a href="#">(matrix)</a> | <a href="#">svg</a> |
| 88 |  | BATF(bZIP)/Th17-BATF-ChIP-Seq(GSE39756)/Homer                 | 1e-2 | -4.642e+00 | 0.0399 | 230.0 | 18.59% | 7801.3 | 16.07% | <a href="#">motif</a><br><a href="#">file</a><br><a href="#">(matrix)</a> | <a href="#">svg</a> |
