# Supplementary material for: TLE3 loss confers AR inhibitor resistance by facilitating GR-mediated human prostate cancer cell growth
Source: eLife. 2019 Dec 19;8:e47430. doi: 10.7554/eLife.47430 (PMC6968917; doi:10.7554/eLife.47430)
Supplement: Supplementary file 3. [file elife-47430-supp3.xlsx]

## Sheet: Munka1
Sample	Expression (1=high)	Time (months)	Event
TCGA-CH-5751-01A-11R-1580-07	1	35.5	0
TCGA-KK-A59Y-01A-11R-A26U-07	1	45.3	0
TCGA-YL-A9WK-01A-11R-A37L-07	1	33.6	1
TCGA-J4-AATZ-01A-11R-A41O-07	1	13.7	0
TCGA-KK-A6E0-01A-11R-A311-07	0	31.4	1
TCGA-FC-A5OB-01A-11R-A29R-07	0	9.1	0
TCGA-KK-A7B0-01A-11R-A32O-07	1	33.3	0
TCGA-YL-A8SL-01B-21R-A37L-07	0	26.6	0
TCGA-G9-A9S0-01A-11R-A41O-07	1	14.3	1
TCGA-KK-A8I9-01A-11R-A36G-07	1	24	0
TCGA-VP-A878-01A-31R-A352-07	1	96	0
TCGA-YL-A8SP-01B-11R-A37L-07	1	72.3	0
TCGA-2A-A8VT-01A-11R-A37L-07	1	33.2	0
TCGA-ZG-A9N3-01A-11R-A41O-07	0	8.1	0
TCGA-HI-7171-01A-12R-2118-07	0	7.3	1
TCGA-CH-5752-01A-11R-1580-07	1	31.4	0
TCGA-KC-A4BR-01A-32R-A32Y-07	1	45	0
TCGA-YL-A8HM-01A-11R-A36G-07	0	37.5	0
TCGA-XJ-A9DI-01A-11R-A37L-07	0	48.7	0
TCGA-YL-A8SK-01B-21R-A37L-07	1	38.5	0
TCGA-HI-7168-01A-11R-2118-07	0	10.3	1
TCGA-KK-A8I7-01A-21R-A36G-07	1	63	0
TCGA-ZG-A9LN-01A-11R-A41O-07	0	3.8	0
TCGA-J4-A6G3-01A-11R-A311-07	1	17.6	0
TCGA-CH-5741-01A-11R-1580-07	1	13.2	0
TCGA-XJ-A9DX-01A-11R-A37L-07	1	26.3	0
TCGA-YL-A8SO-01B-31R-A37L-07	1	108.2	0
TCGA-VN-A88R-01A-11R-A36G-07	1	15.3	0
TCGA-XK-AAIV-01A-11R-A41O-07	0	31.9	0
TCGA-V1-A8MU-01A-11R-A37L-07	1	46.6	0
TCGA-4L-AA1F-01A-11R-A41O-07	0	11.7	0
TCGA-YL-A8HK-01A-11R-A36G-07	0	45.9	1
TCGA-M7-A724-01A-12R-A32O-07	1	16.1	0
TCGA-KK-A8IC-01A-11R-A36G-07	1	35.3	1
TCGA-ZG-A8QZ-01A-11R-A37L-07	0	10.3	0
TCGA-YL-A8SQ-01B-11R-A37L-07	1	48.2	1
TCGA-YL-A9WY-01A-11R-A41O-07	0	25.5	1
TCGA-HC-8257-01A-11R-2263-07	1	1	0
TCGA-YL-A8SI-01A-11R-A41O-07	1	48	0
TCGA-CH-5788-01A-11R-1580-07	1	26.2	1
TCGA-YL-A9WL-01A-11R-A41O-07	1	24.7	1
TCGA-VP-A87B-01A-11R-A352-07	1	77	0
TCGA-YL-A9WH-01A-11R-A37L-07	0	14.2	0
TCGA-V1-A9O5-01A-11R-A41O-07	0	4.1	1
TCGA-KK-A6E1-01A-11R-A311-07	1	55.3	0
TCGA-J9-A52B-01A-11R-A26U-07	1	14.1	0
TCGA-KK-A8I4-01A-11R-A36G-07	1	68.9	0
TCGA-KK-A7AQ-01A-11R-A33R-07	1	46.2	0
TCGA-V1-A8WV-01A-11R-A37L-07	1	22.9	0
TCGA-YL-A8HL-01A-11R-A36G-07	1	39.1	0
TCGA-G9-7521-01A-11R-2263-07	1	16.2	0
TCGA-VP-A87D-01A-11R-A352-07	1	39.8	1
TCGA-YL-A8SC-01A-11R-A37L-07	1	42	0
TCGA-X4-A8KQ-01A-12R-A36G-07	1	37.7	0
TCGA-M7-A723-01A-12R-A32O-07	0	2.1	0
TCGA-YL-A8SB-01A-31R-A37L-07	1	46.1	0
TCGA-KK-A8II-01A-11R-A36G-07	1	20.9	1
TCGA-KK-A8ID-01A-11R-A36G-07	1	65.8	0
TCGA-KK-A7B4-01A-11R-A32O-07	1	21.2	1
TCGA-YL-A8HJ-01A-11R-A36G-07	0	53.7	0
TCGA-G9-A9S4-01A-11R-A41O-07	1	25.2	0
TCGA-KK-A7AU-01A-11R-A32O-07	1	54	0
TCGA-VN-A88K-01A-11R-A352-07	1	25.9	0
TCGA-KK-A8IA-01A-11R-A36G-07	1	48	0
TCGA-J9-A52E-01A-11R-A26U-07	0	10.8	0
